# Supplementary material for: EHMT2 directs DNA methylation for efficient gene silencing in mouse embryos
Source: HighWire-hosted journal article supplement (doi:10.1101/gr.198291.115), 2015-11-17
Supplement: SuppTable_S1.xlsx [file SuppTable_S1.xlsx]

## Sheet: eDMR_WTvsG9aKO
chrom	start	end	Ov_Rep	Rep_name	Ov_Exon	GeneName_Exon	Ov_Intron	GeneName_Intron	Ov_CGI	dist to closest TSS	GeneName_TSS	Meth Ehmt2KO-WT	DMR.qvalue	Meth WT#1	Meth WT#2	Meth WT#3	Meth WT#4	Meth Ehmt2KO#1	Meth Ehmt2KO#2	Meth Ehmt2KO#3
chr15	40162579	40162639	1	LTR/ERVK/RLTR17	0		0		0	28245	9330182O14Rik	-0.812	2e-29	0.905	0.948	0.81	0.963	0.083	0	0.2
chr18	62749369	62749824	1	LTR/ERVK/RLTR16B_MM	0		0		0	6751	2700046A07Rik	-0.811	6e-41	0.913	0.89	0.888	0.842	0.088	0.056	0.074
chr10	114119334	114119507	0		0		0		0	532843	Mir669h	-0.777	8e-36	0.893	0.968	0.946	0.925	0.235	0.078	0.156
chr5	97392052	97392400	0		1	Naa11	0		1	104	Naa11	-0.737	6e-40	0.928	0.915	0.934	0.935	0.159	0.228	0.184
chr17	69037952	69038073	0		0		0		0	-118797	Epb4.1l3	-0.724	3e-33	0.789	0.815	0.823	0.821	0.084	0.089	0.091
chr8	92560439	92560535	0		0		0		0	-113801	Irx6	-0.688	3e-33	0.71	0.783	0.756	0.797	0.106	0.034	0.08
chr12	119346338	119346373	1	LINE/L1/L1Md_T	0		0		0	-97053	Macc1	-0.675	2e-29	0.779	0.807	0.752	0.754	0.113	0.093	0.087
chr16	23901674	23901742	1	LTR/ERVK/RLTR17	0		0		0	-10864	Sst	-0.674	2e-29	0.893	0.885	0.915	0.907	0.232	0.272	0.173
chrX	72217884	72217937	0		0		0		0	-4106	Magea4	-0.67	5e-24	0.867	0.784	0.82	0.789	0.115	0.268	0.051
chr7	120409607	120409660	0		1	Abca16	0		0	-12	Abca16	-0.665	3e-33	0.764	0.757	0.757	0.719	0.096	0.082	0.073
chr9	16452862	16452932	1	LINE/L1/L1Md_T	0		0		0	-74666	Fat3	-0.658	1e-37	0.956	0.928	0.918	0.908	0.257	0.289	0.261
chr15	27422173	27422326	1	LTR/ERVK/RLTR17	0		0		0	-44426	Ank	-0.646	3e-40	0.89	0.904	0.909	0.879	0.288	0.227	0.234
chr5	75518470	75518607	0		0		0		0	-56448	Kit	-0.642	8e-36	0.662	0.676	0.697	0.732	0.039	0.046	0.064
chr11	36943966	36944150	0		1	Tenm2	0		0	183	Tenm2	-0.626	1e-39	0.689	0.634	0.691	0.779	0.074	0.072	0.067
chr5	149324868	149324969	0		0		0		0	59861	Alox5ap	-0.613	8e-36	0.75	0.775	0.761	0.674	0.088	0.081	0.209
chrX	73214317	73214688	0		1	Xlr4b	1	Xlr4b	0	170	Xlr4b	-0.606	7e-27	0.895	0.87	0.856	0.923	0.19	0.525	0.114
chrX	69147216	69147517	1	LINE/L1/L1Md_Gf	0		0		0	-212964	Aff2	-0.605	8e-41	0.893	0.951	0.956	0.869	0.289	0.609	0.189
chr1	96240837	96240992	1	LINE/L1/L1Md_T	0		0		0	-219156	1700063A18Rik	-0.604	7e-39	0.903	0.876	0.899	0.884	0.379	0.21	0.269
chr11	82163480	82164017	1	LTR/ERVK/RLTR16C_MM	0		0		0	16064	Ccl1	-0.603	1e-40	0.776	0.807	0.833	0.786	0.234	0.214	0.147
chr12	12987024	12987086	0		0		0		0	-45219	Mycn	-0.596	3e-33	0.83	0.773	0.804	0.766	0.211	0.176	0.203
chr19	36716269	36716372	1	LTR/ERVK/MLTR31FA_MM	0		0		0	20284	Ppp1r3c	-0.596	8e-36	0.628	0.674	0.704	0.636	0.075	0.049	0.068
chr1	24312195	24312296	0		0		1	Col19a1	0	117044	Col9a1	-0.59	2e-29	0.761	0.814	0.749	0.754	0.145	0.09	0.303
chr2	170888154	170888466	0		0		0		0	156504	Dok5	-0.59	5e-35	0.652	0.691	0.672	0.682	0.073	0.084	0.096
chr5	149587616	149587682	0		0		1	Wdr95	0	48666	Hsph1	-0.589	2e-29	0.834	0.829	0.889	0.846	0.317	0.202	0.262
chr10	86080087	86080156	0		0		1	Syn3	0	-15731	4930486F22Rik	-0.588	3e-33	0.798	0.849	0.881	0.828	0.24	0.26	0.253
chr1	184634259	184634335	1	LINE/L1/Lx5	0		0		0	-76606	1700112H15Rik	-0.578	8e-36	0.773	0.75	0.778	0.768	0.192	0.146	0.23
chr17	57973786	57973922	1	LINE/L1/L1Md_T	0		1	Cntnap5c	0	204285	Cntnap5c	-0.578	3e-40	0.909	0.911	0.932	0.918	0.413	0.314	0.291
chr4	69428920	69429574	2	LINE/L1/L1Md_Gf--LINE/L1/L1Md_F2	0		0		0	-474850	Brinp1	-0.574	9e-41	0.664	0.684	0.699	0.641	0.107	0.095	0.091
chr18	85001920	85001980	1	LINE/L1/L1Md_T	0		0		0	-50426	Timm21	-0.573	3e-33	0.914	0.898	0.881	0.889	0.342	0.241	0.382
chr15	101835396	101835541	0		0		0		0	15318	Krt1	-0.572	8e-36	0.904	0.91	0.887	0.899	0.316	0.276	0.392
chr10	28041001	28041094	1	LINE/L1/L1Md_T	0		0		0	-33771	Ptprk	-0.572	1e-37	0.928	0.919	0.885	0.91	0.323	0.315	0.378
chr17	34911506	34911598	0		1	Ehmt2	1	Ehmt2	0	-2913	Slc44a4	-0.569	3e-33	0.911	0.894	0.922	0.888	0.306	0.338	0.36
chrX	73192267	73192349	0		0		1	Xlr3b	0	130	Xlr3b	-0.567	1e-18	0.7	0.698	0.749	0.705	0.116	0.22	0.102
chr8	113531201	113531281	0		0		1	4930571O06Rik	0	13960	4930571O06Rik	-0.555	3e-33	0.8	0.822	0.848	0.826	0.272	0.26	0.274
chr18	61953555	61953731	0		0		1	Sh3tc2	0	569	Sh3tc2	-0.553	6e-41	0.87	0.852	0.877	0.869	0.324	0.238	0.378
chr2	6505721	6505783	0		0		0		0	153017	Usp6nl	-0.55	1e-15	0.696	0.824	0.706	0.777	0.236	0.156	0.206
chr1	153855403	153855535	0		0		0		0	-4274	Teddm2	-0.547	7e-26	0.892	0.908	0.884	0.879	0.376	0.329	0.329
chr7	98423507	98423712	0		0		0		0	-16805	Gucy2d	-0.539	1e-09	0.671	0.715	0.693	0.692	0.146	0.351	0.142
chr8	110152770	110152908	0		0		1	Calb2	0	-8506	Mir544	-0.536	5e-21	0.606	0.598	0.678	0.631	0.091	0.096	0.093
chr6	67205609	67205837	0		0		0		0	-61255	Serbp1	-0.528	6e-32	0.853	0.837	0.8	0.804	0.302	0.251	0.336
chr2	147870940	147871082	1	LINE/L1/L1Md_T	0		0		0	160319	A530006G24Rik	-0.526	6e-41	0.714	0.68	0.678	0.66	0.141	0.157	0.173
chr6	15684698	15684785	1	LINE/L1/L1Md_T	0		0		0	-35918	Mdfic	-0.526	8e-36	0.888	0.907	0.935	0.897	0.337	0.384	0.42
chr11	99350859	99350975	0		1	Krt27	0		0	177	Krt27	-0.523	3e-40	0.783	0.742	0.778	0.765	0.244	0.216	0.269
chr6	4282490	4282542	1	LINE/L1/L1Md_T	0		0		0	-195589	Bet1	-0.522	8e-36	0.905	0.926	0.921	0.905	0.355	0.401	0.422
chr6	121540050	121540206	0		0		0		0	-66450	Iqsec3	-0.521	6e-41	0.853	0.884	0.904	0.844	0.384	0.244	0.422
chr1	131003449	131003577	0		0		0		0	-16331	Il10	-0.52	7e-39	0.514	0.592	0.548	0.497	0.007	0.01	0.035
chr6	18108941	18109176	0		1	Asz1	0		0	3	Asz1	-0.518	2e-36	0.939	0.954	0.948	0.933	0.395	0.426	0.453
chr17	49761747	49761860	0		0		1	Kif6	0	146633	Kif6	-0.518	2e-34	0.827	0.83	0.888	0.889	0.386	0.281	0.355
chr13	40887899	40888060	0		1	Gcnt2	1	Gcnt2	0	1223	Gcnt2	-0.516	5e-33	0.654	0.732	0.671	0.686	0.148	0.186	0.176
chr3	135571706	135572047	1	LTR/ERVK/RLTR16C_MM	0		0		0	86266	Manba	-0.516	1e-40	0.67	0.683	0.676	0.698	0.169	0.155	0.175
chr15	98226004	98226185	0		0		0		0	-5038	Olfr287	-0.514	3e-33	0.754	0.781	0.77	0.788	0.211	0.274	0.288
chr16	89693457	89693552	1	LTR/ERVK/RLTR44B	0		0		0	-122321	Krtap11-1	-0.513	8e-36	0.889	0.871	0.887	0.861	0.421	0.299	0.372
chr4	98081517	98081560	0		0		1	Nfia	0	301727	Tm2d1	-0.512	3e-15	0.842	0.833	0.936	0.889	0.423	0.255	0.412
chr1	68385875	68385993	0		0		1	Erbb4	0	722125	Erbb4	-0.51	1e-37	0.856	0.874	0.838	0.835	0.387	0.306	0.327
chr5	52975562	52975615	0		0		1	5033403H07Rik	0	16704	5033403H07Rik	-0.509	8e-26	0.803	0.674	0.704	0.698	0.09	0.156	0.388
chr7	114283167	114283276	1	LTR/ERVK/RLTR17	0		0		0	-7106	Psma1	-0.506	2e-29	0.791	0.714	0.745	0.74	0.24	0.249	0.235
chr16	87843292	87843367	1	LTR/ERVK/RLTR17	0		0		0	144377	Bach1	-0.502	3e-33	0.884	0.892	0.904	0.916	0.458	0.356	0.376
chr10	100681464	100681524	1	LINE/L1/L1Md_T	0		0		0	89109	1700017N19Rik	-0.501	2e-29	0.92	0.9	0.901	0.896	0.328	0.454	0.427
chr9	100323184	100323243	1	LTR/ERVK/RLTR17	0		0		0	163259	Il20rb	-0.5	8e-36	0.923	0.929	0.926	0.912	0.378	0.472	0.416
chr5	32053629	32053700	0		0		1	Bre	0	-82807	Fosl2	-0.497	3e-33	0.754	0.765	0.775	0.748	0.28	0.233	0.277
chr13	14317087	14317163	0		1	Hecw1	0		0	206101	Hecw1	-0.493	3e-33	0.93	0.929	0.893	0.91	0.399	0.386	0.482
chr17	57302211	57302289	0		1	Vav1	1	Vav1	0	23151	Vav1	-0.493	2e-29	0.914	0.88	0.929	0.89	0.494	0.268	0.467
chr2	76360122	76360284	0		0		1	Cyct	0	250	Cyct	-0.493	1e-39	0.899	0.869	0.878	0.893	0.356	0.49	0.332
chr8	108363881	108364068	0		0		0		0	220703	3010033K07Rik	-0.492	7e-39	0.58	0.646	0.683	0.673	0.187	0.133	0.138
chr1	45587518	45587594	1	LTR/ERV1/RLTR41A2	0		0		0	-84274	Col5a2	-0.491	3e-33	0.802	0.75	0.826	0.791	0.289	0.336	0.279
chr14	8800347	8800413	0		0		0		0	133991	4930455B14Rik	-0.489	1e-39	0.508	0.656	0.603	0.627	0.092	0.132	0.102
chr11	114485426	114485664	0		0		1	Mir466n	0	-36685	4932435O22Rik	-0.488	9e-30	0.643	0.648	0.62	0.616	0.142	0.194	0.097
chr17	33139480	33139636	0		1	Morc2b	0		0	125	Morc2b	-0.486	1e-25	0.674	0.753	0.723	0.715	0.187	0.235	0.266
chrX	156838028	156838237	1	LINE/L1/L1Md_Gf	0		0		0	298650	4930503H13Rik	-0.484	2e-30	0.773	0.888	0.936	0.796	0.263	0.448	0.38
chr1	166940047	166940177	1	LTR/ERVK/IAPLTR2_Mm	0		0		0	59618	Gm16701	-0.483	8e-37	0.654	0.655	0.561	0.594	0.164	0.074	0.162
chr7	135395990	135396201	0		0		0		0	-14270	Foxi2	-0.481	8e-16	0.866	0.934	0.93	0.903	0.443	0.379	0.458
chr4	58034581	58034786	0		0		0		0	-25560	Txndc8	-0.481	8e-24	0.557	0.566	0.459	0.489	0.032	0.039	0.041
chr5	92587666	92587771	0		0		1	Fam47e	0	-15332	Stbd1	-0.479	8e-36	0.687	0.72	0.714	0.666	0.244	0.204	0.203
chr17	37995808	37996031	0		0		0		0	-42898	Olfr761	-0.477	2e-22	0.639	0.409	0.602	0.496	0.068	0.099	0.011
chr2	136550207	136550300	0		1	Ankef1	0		0	17934	Ankef1	-0.471	1e-39	0.882	0.881	0.856	0.836	0.422	0.348	0.405
chr7	51510250	51510534	0		0		0		0	-636	Ano5	-0.468	7e-34	0.795	0.797	0.786	0.797	0.372	0.278	0.328
chr8	112310678	112310865	1	LTR/ERVK/RMER17B	0		0		0	-259270	Cntnap4	-0.468	4e-25	0.831	0.83	0.853	0.818	0.43	0.396	0.262
chr3	78993233	78993441	0		0		0		0	152538	Rapgef2	-0.467	6e-41	0.673	0.704	0.706	0.677	0.229	0.216	0.224
chr18	64288622	64288755	0		0		0		0	-11508	St8sia3os	-0.467	5e-39	0.951	0.96	0.942	0.916	0.47	0.448	0.508
chr17	57493031	57493257	0		0		0		0	52170	Vmn2r120	-0.458	6e-40	0.821	0.879	0.844	0.88	0.36	0.433	0.403
chr2	151095637	151095718	1	LINE/L1/L1Md_Gf	0		0		0	-2566	Gm14151	-0.457	1e-37	0.834	0.857	0.888	0.862	0.416	0.33	0.462
chr8	24338828	24338901	0		0		0		0	100082	1810011O10Rik	-0.453	2e-22	0.923	0.95	0.889	0.884	0.356	0.583	0.435
chr3	99500298	99500452	0		0		0		0	246616	Tbx15	-0.45	4e-38	0.923	0.851	0.852	0.799	0.532	0.386	0.304
chr1	168720383	168720726	1	LINE/L1/L1Md_T	0		0		0	229912	Mir6348	-0.445	2e-40	0.862	0.852	0.861	0.887	0.417	0.427	0.419
chr6	21451949	21452019	1	LINE/L1/L1Md_T	0		1	Kcnd2	0	235876	Kcnd2	-0.443	8e-36	0.914	0.907	0.944	0.909	0.517	0.404	0.506
chr11	105972384	105972520	0		1	Ace--Gm11651	1	Gm11651	0	-2755	Ace	-0.443	5e-35	0.734	0.731	0.741	0.742	0.296	0.28	0.305
chr19	30017529	30017848	1	LTR/ERVK/RLTR17	0		0		0	-12824	Uhrf2	-0.443	1e-21	0.888	0.899	0.917	0.881	0.505	0.462	0.401
chr15	36691294	36691333	1	LTR/ERVK/RLTR12C	0		0		0	-82341	Pabpc1	-0.441	9e-29	0.602	0.7	0.693	0.676	0.234	0.253	0.194
chr1	44419030	44419186	1	LINE/L1/L1Md_T	0		0		0	-132562	Gulp1	-0.441	6e-41	0.872	0.865	0.894	0.88	0.445	0.387	0.476
chr10	71130313	71130462	1	Other/Other/RMER1A	0		1	Bicc1	0	29246	Bicc1	-0.441	8e-17	0.49	0.509	0.487	0.395	0.044	0	0.044
chr3	146293736	146293796	1	LINE/L1/L1Md_T	0		0		0	72806	Lpar3	-0.44	1e-37	0.785	0.811	0.788	0.849	0.33	0.408	0.367
chr13	59866288	59866438	1	LTR/ERVK/RLTR31M	0		0		0	-43216	Zcchc6	-0.44	5e-12	0.746	0.788	0.71	0.738	0.372	0.189	0.353
chr15	55407833	55407906	0		1	Col14a1	1	Col14a1	0	100121	Col14a1	-0.439	6e-31	0.914	0.885	0.932	0.837	0.548	0.343	0.467
chr2	24435742	24435952	0		1	Pax8	1	Pax8	0	39752	Pax8	-0.438	2e-19	0.822	0.768	0.824	0.88	0.299	0.408	0.449
chr7	63544339	63544400	0		0		1	Otud7a	0	99599	Otud7a	-0.436	7e-39	0.841	0.892	0.785	0.874	0.473	0.366	0.398
chr5	120114615	120114950	0		0		0		0	-1730	Rbm19	-0.436	3e-35	0.867	0.824	0.893	0.835	0.388	0.446	0.472
chr11	91330675	91330758	1	LTR/ERVK/RLTR26_Mus	0		0		0	246839	Kif2b	-0.436	2e-29	0.81	0.851	0.832	0.819	0.42	0.328	0.429
chr8	110007183	110007352	0		0		0		0	16833	Tat	-0.434	8e-29	0.761	0.705	0.717	0.701	0.317	0.196	0.348
chr1	89974577	89974739	0		0		1	Asb18	0	39919	Asb18	-0.433	4e-30	0.764	0.826	0.753	0.816	0.327	0.381	0.362
chr11	82690779	82691070	0		0		0		0	-48822	Mir1928	-0.433	2e-23	0.676	0.687	0.667	0.69	0.201	0.266	0.276
chr16	88938477	88938552	0		0		0		0	-6250	Krtap19-9b	-0.433	2e-21	0.746	0.77	0.718	0.746	0.326	0.386	0.225
chr8	109314856	109314993	0		0		0		0	25984	Gm1943	-0.431	3e-26	0.541	0.558	0.604	0.52	0.107	0.112	0.155
chr1	52982840	52982910	1	LINE/L1/L1Md_T	0		0		0	-30035	1700019D03Rik	-0.43	8e-36	0.886	0.9	0.892	0.877	0.499	0.484	0.393
chr11	64545370	64545467	0		0		0		0	-108744	F930015N05Rik	-0.428	4e-15	0.628	0.65	0.719	0.676	0.274	0.261	0.186
chr11	22800588	22800664	0		0		0		0	59109	B3gnt2	-0.424	3e-33	0.814	0.763	0.774	0.774	0.315	0.37	0.383
chr18	81981336	81981559	0		0		0		0	10632	Mir5127	-0.424	2e-11	0.78	0.669	0.812	0.675	0.387	0.214	0.329
chr12	104761107	104761561	1	LTR/ERVK/RLTR17	0		0		0	-9382	Dicer1	-0.422	6e-31	0.882	0.889	0.903	0.886	0.478	0.489	0.441
chr15	38237965	38238025	0		0		0		0	18793	Odf1	-0.419	1e-28	0.794	0.755	0.819	0.693	0.362	0.338	0.337
chr4	88878455	88878533	0		0		0		0	1707	Ifne	-0.418	3e-33	0.48	0.539	0.567	0.491	0.137	0.087	0.079
chr13	97403897	97403935	1	LTR/ERVK/RLTR20A	0		0		0	-31053	Lincenc1	-0.418	5e-15	0.575	0.773	0.672	0.667	0.197	0.29	0.267
chr6	24348261	24348404	0		0		0		0	166735	Iqub	-0.416	7e-26	0.562	0.592	0.546	0.605	0.201	0.155	0.124
chr10	110225157	110225238	1	LINE/L1/L1Md_T	0		0		0	-224979	Nav3	-0.415	1e-37	0.932	0.892	0.875	0.902	0.437	0.535	0.483
chr13	90993880	90994033	0		0		1	Atg10	0	70835	Rps23	-0.415	2e-38	0.756	0.752	0.818	0.815	0.416	0.38	0.311
chr11	86055928	86056247	1	LTR/ERVK/RLTR17	0		0		0	-31738	Gm20759	-0.415	2e-31	0.732	0.711	0.724	0.717	0.313	0.326	0.279
chr14	43713749	43713813	0		0		0		0	-105768	Gm10375	-0.414	7e-39	0.914	0.914	0.93	0.901	0.495	0.492	0.513
chr10	116418339	116418495	0		1	Kcnmb4os1--Kcnmb4	1	Kcnmb4	1	297	Kcnmb4os1	-0.414	4e-23	0.664	0.701	0.647	0.676	0.206	0.272	0.295
chr5	75849045	75849090	0		0		0		0	129360	Kdr	-0.413	2e-29	0.79	0.86	0.802	0.838	0.436	0.399	0.395
chr17	10080223	10080484	0		0		0		0	239007	Qk	-0.413	2e-35	0.807	0.818	0.839	0.813	0.424	0.354	0.439
chr5	19962670	19962740	1	LINE/L1/L1Md_T	0		1	Magi2	0	55188	Magi2	-0.411	8e-36	0.921	0.911	0.912	0.9	0.448	0.539	0.513
chr2	85136896	85136989	0		1	Aplnr	0		0	583	Aplnr	-0.405	2e-27	0.746	0.697	0.684	0.663	0.266	0.311	0.299
chr3	13429857	13429933	0		0		0		0	-41759	Ralyl	-0.404	8e-31	0.84	0.865	0.854	0.848	0.452	0.525	0.368
chr5	43909325	43909391	0		0		1	Cd38	0	40532	Cd38	-0.403	1e-32	0.694	0.661	0.682	0.617	0.247	0.254	0.28
chr11	26926004	26926087	0		0		0		0	140939	Gm12070	-0.403	3e-33	0.893	0.912	0.904	0.91	0.536	0.434	0.533
chr8	26314740	26314818	1	LTR/ERVK/RLTR17	0		0		0	156611	Thap1	-0.402	2e-29	0.922	0.935	0.924	0.928	0.515	0.46	0.6
chr16	13076256	13076371	0		0		0		0	-33421	Ercc4	-0.401	7e-16	0.76	0.816	0.796	0.749	0.391	0.377	0.366
chr14	33589215	33589793	0		1	Ptpn20	1	Ptpn20	0	235	Ptpn20	-0.4	1e-30	0.784	0.762	0.779	0.801	0.36	0.387	0.396
chr5	81595528	81595593	0		0		1	Lphn3	0	573968	Lphn3	-0.4	3e-10	0.626	0.696	0.853	0.703	0.211	0.354	0.396
chr9	8477588	8477744	1	LINE/L1/L1Md_T	0		0		0	-66475	Trpc6	-0.399	6e-41	0.918	0.938	0.94	0.922	0.597	0.521	0.475
chr10	53255497	53255605	1	LTR/ERVK/RMER17A	0		0		0	-24718	Gm19395	-0.399	7e-36	0.851	0.858	0.853	0.841	0.45	0.437	0.47
chrX	38300047	38300260	0		0		0		0	-15967	Atp1b4	-0.398	4e-18	0.869	0.89	0.888	0.853	0.442	0.563	0.425
chr17	22976664	22976669	1	LINE/L1/L1Md_A	0		0		0	-28304	Vmn2r-ps129	-0.397	4e-09	0.901	0.945	0.878	0.868	0.6	0.437	0.467
chr13	56870645	56870829	0		0		1	Trpc7	0	25052	Trpc7	-0.396	2e-19	0.718	0.727	0.696	0.671	0.332	0.286	0.301
chr1	193509596	193509707	0		0		0		0	-2122	Mir205	-0.395	4e-32	0.582	0.611	0.574	0.619	0.218	0.175	0.211
chr9	106566612	106566717	1	LTR/ERVK/RLTR26_Mus	0		0		0	4303	Iqcf4	-0.394	7e-31	0.62	0.585	0.582	0.608	0.234	0.167	0.212
chr14	120148683	120148939	0		0		0		0	-106376	Oxgr1	-0.394	2e-38	0.88	0.901	0.877	0.917	0.472	0.483	0.546
chr1	166100581	166100816	0		1	Dusp27	0		0	27200	Dusp27	-0.394	3e-36	0.823	0.849	0.839	0.795	0.481	0.359	0.46
chr15	97059034	97059218	0		0		0		0	-3170	Slc38a4	-0.391	7e-39	0.929	0.925	0.936	0.918	0.539	0.575	0.492
chr19	58759563	58759675	0		0		0		0	-103	Pnliprp2	-0.391	2e-36	0.68	0.716	0.743	0.724	0.342	0.296	0.333
chr9	64934256	64934325	0		0		1	Slc24a1	0	17317	Slc24a1	-0.391	1e-26	0.549	0.595	0.541	0.589	0.175	0.155	0.202
chr3	141211386	141211609	0		1	Pdha2	0		1	857	Pdha2	-0.39	1e-37	0.949	0.946	0.967	0.95	0.57	0.521	0.599
chr8	104068705	104068887	0		0		0		0	-32828	Cdh5	-0.39	1e-14	0.76	0.692	0.644	0.662	0.309	0.352	0.239
chr6	6905504	6905628	0		0		0		0	-23498	Dlx5	-0.389	7e-18	0.747	0.842	0.818	0.825	0.391	0.409	0.45
chr1	162120240	162120311	1	LINE/L1/L1Md_T	0		1	Dnm3	0	-97346	Dnm3os	-0.388	1e-37	0.684	0.658	0.75	0.654	0.287	0.306	0.3
chr5	149343611	149343745	0		0		0		0	-68127	Medag	-0.388	4e-21	0.945	0.919	0.928	0.946	0.489	0.536	0.613
chr4	119638700	119638768	0		1	Guca2a	0		0	1003	Guca2a	-0.387	2e-29	0.645	0.694	0.729	0.692	0.304	0.282	0.322
chr3	39910971	39911064	0		0		0		0	611894	1700017G19Rik	-0.386	2e-10	0.79	0.807	0.804	0.785	0.475	0.45	0.399
chr4	121054606	121054685	0		1	Col9a2	0		0	15081	Col9a2	-0.385	5e-21	0.786	0.823	0.78	0.779	0.441	0.416	0.365
chr15	3303375	3303628	0		1	Ccdc152	1	Ccdc152	0	24	Ccdc152	-0.385	3e-20	0.882	0.816	0.876	0.879	0.592	0.455	0.387
chr1	61356191	61356423	0		0		0		0	-22124	9530026F06Rik	-0.384	3e-31	0.633	0.682	0.662	0.686	0.29	0.266	0.29
chr17	36461235	36461343	0		1	H2-M10.4	0		0	1040	H2-M10.4	-0.384	3e-27	0.868	0.834	0.834	0.832	0.458	0.445	0.47
chr13	4211828	4211941	0		0		0		0	20698	Akr1c13	-0.383	3e-22	0.822	0.784	0.786	0.76	0.307	0.365	0.544
chr9	115626136	115626208	0		0		0		0	-283282	Gadl1	-0.383	7e-39	0.793	0.834	0.823	0.899	0.529	0.387	0.445
chr9	18779403	18779799	0		0		0		0	-23968	Olfr24	-0.383	2e-09	0.729	0.671	0.694	0.663	0.302	0.409	0.27
chr3	54811011	54811390	0		0		0		1	-3409	Rfxap	-0.382	5e-15	0.634	0.713	0.639	0.716	0.288	0.3	0.292
chr11	57465256	57465439	0		0		0		0	53296	Fam114a2	-0.382	7e-07	0.634	0.681	0.555	0.644	0.282	0.208	0.25
chr14	61598755	61598885	0		0		1	Trim13	0	595	Trim13	-0.382	7e-35	0.708	0.727	0.693	0.705	0.307	0.347	0.324
chr11	112818405	112818632	0		0		0		0	-19510	Gm11681	-0.381	3e-10	0.573	0.52	0.61	0.55	0.127	0.131	0.286
chr18	56459211	56459333	0		0		1	Gramd3	0	27141	Gramd3	-0.381	1e-26	0.735	0.635	0.686	0.652	0.336	0.236	0.314
chr12	80721993	80722071	0		1	Plekhd1	0		0	29432	Plekhd1	-0.381	1e-39	0.922	0.902	0.92	0.91	0.5	0.539	0.556
chr2	85137669	85137859	0		1	Aplnr	0		0	1405	Aplnr	-0.38	1e-10	0.481	0.547	0.538	0.503	0.165	0.16	0.086
chr11	12756495	12756849	1	LINE/L1/L1Md_Gf	0		0		0	-291712	Cobl	-0.379	6e-38	0.697	0.747	0.752	0.714	0.41	0.341	0.293
chr13	21329811	21330005	1	LINE/L1/L1Md_T	0		0		0	-17021	Olfr1367	-0.379	2e-23	0.921	0.896	0.862	0.906	0.535	0.482	0.534
chr8	36024527	36024619	1	LTR/ERVK/RMER13B	0		0		0	-70254	D8Ertd82e	-0.378	2e-35	0.845	0.83	0.865	0.841	0.409	0.395	0.598
chr2	58963416	58963591	1	Other/Other/RMER1A	0		1	Ccdc148	0	55102	Ccdc148	-0.377	4e-30	0.764	0.763	0.728	0.771	0.406	0.351	0.384
chr9	44513823	44514107	0		1	Cxcr5	0		0	12456	Cxcr5	-0.377	8e-30	0.843	0.884	0.841	0.854	0.475	0.493	0.47
chr11	17284193	17284299	0		0		0		0	26629	C1d	-0.376	3e-32	0.685	0.608	0.612	0.64	0.272	0.235	0.274
chr14	68036966	68037081	1	LTR/ERVK/RLTR17	0		0		0	-46859	Nefl	-0.376	2e-27	0.719	0.775	0.719	0.761	0.411	0.357	0.336
chr18	82838841	82839117	0		0		0		0	-16917	4930445N18Rik	-0.375	3e-28	0.738	0.766	0.726	0.714	0.346	0.382	0.355
chr3	129788733	129789163	0		1	Lrit3	0		0	15082	Lrit3	-0.374	6e-36	0.863	0.83	0.83	0.822	0.5	0.435	0.469
chr12	109862052	109862205	1	LINE/L1/L1_Mur3	0		0		0	114251	Mir3072	-0.372	6e-09	0.715	0.62	0.667	0.67	0.357	0.268	0.263
chr12	9256212	9256355	0		0		0		0	226288	Ttc32	-0.372	1e-36	0.798	0.836	0.844	0.781	0.487	0.408	0.428
chr14	95362917	95362993	1	LINE/L1/L1Md_T	0		0		0	-518310	4921530L21Rik	-0.371	1e-37	0.92	0.936	0.928	0.939	0.524	0.568	0.586
chr18	40530662	40530846	0		1	Kctd16	0		0	272394	Kctd16	-0.371	2e-07	0.717	0.768	0.688	0.709	0.383	0.284	0.381
chr13	109091776	109092037	1	LTR/ERVK/RLTR44E	0		1	Pde4d	0	-232837	Mir582	-0.371	9e-08	0.706	0.733	0.667	0.65	0.23	0.454	0.269
chr10	41607290	41607417	0		0		0		0	-19601	Ccdc162	-0.37	6e-23	0.426	0.404	0.388	0.488	0.042	0.056	0.071
chr16	95601031	95601280	0		0		0		0	-14563	Erg	-0.37	3e-39	0.891	0.883	0.897	0.891	0.533	0.454	0.572
chr11	50622550	50622578	0		0		1	Adamts2	0	20480	Adamts2	-0.368	1e-06	0.597	0.719	0.712	0.667	0.233	0.347	0.333
chr17	64557704	64557801	0		0		0		0	-2162	AU016765	-0.368	2e-25	0.867	0.933	0.846	0.879	0.555	0.492	0.491
chr1	181539920	181540048	0		0		0		0	-28533	Ccdc121	-0.367	3e-26	0.626	0.746	0.689	0.656	0.308	0.309	0.32
chr3	131982752	131982861	1	LTR/ERVK/RLTR44E	0		0		0	-102485	Dkk2	-0.366	8e-36	0.901	0.939	0.976	0.929	0.577	0.498	0.634
chr8	56505446	56505545	0		0		0		0	45070	Cep44	-0.366	1e-28	0.832	0.834	0.801	0.837	0.432	0.478	0.467
chr14	9286000	9286169	0		0		0		0	-598010	Mnd1-ps	-0.364	4e-12	0.758	0.792	0.782	0.804	0.393	0.402	0.469
chr2	149775955	149776039	1	LTR/ERVK/RLTR26_Mus	0		0		0	-54785	Syndig1	-0.364	3e-22	0.462	0.504	0.393	0.501	0.07	0.111	0.123
chr6	85076202	85076569	0		1	Npm3-ps1	0		1	246	Npm3-ps1	-0.363	7e-26	0.769	0.806	0.777	0.793	0.418	0.431	0.41
chr15	36729692	36729764	1	LTR/ERVK/RLTR16B_MM	0		0		0	61204	Ywhaz	-0.362	3e-33	0.553	0.547	0.547	0.504	0.173	0.186	0.171
chr1	45439280	45439409	1	LTR/ERVK/RLTR31B_Mm	0		1	Col5a2	0	63938	Col5a2	-0.362	2e-37	0.905	0.901	0.894	0.876	0.526	0.555	0.515
chr17	32481817	32481930	0		1	Cyp4f39	1	Cyp4f39	0	-24587	Cyp4f17	-0.362	5e-29	0.772	0.72	0.762	0.731	0.378	0.34	0.435
chr2	22869839	22870004	1	LTR/ERVK/RMER17B	0		1	Apbb1ip	0	-25599	Pdss1	-0.362	3e-22	0.946	0.947	0.931	0.958	0.583	0.582	0.581
chr12	27310808	27310912	0		0		0		0	31858	Sox11	-0.362	5e-35	0.735	0.699	0.717	0.694	0.363	0.342	0.34
chr2	167368499	167368720	0		0		0		0	-19432	B4galt5	-0.361	2e-22	0.74	0.749	0.741	0.735	0.481	0.31	0.35
chr5	81794813	81795017	0		1	Lphn3	0		1	773323	Lphn3	-0.361	4e-11	0.882	0.823	0.886	0.834	0.644	0.384	0.487
chr6	82694858	82694960	0		0		0		0	-42044	Pole4	-0.36	4e-24	0.601	0.64	0.599	0.529	0.226	0.183	0.286
chr6	67246416	67246528	0		0		0		0	-20506	Serbp1	-0.359	2e-22	0.78	0.788	0.765	0.748	0.308	0.422	0.504
chr13	90787789	90787927	1	LTR/ERVK/RLTR26	0		0		0	117497	Atp6ap1l	-0.359	3e-11	0.916	0.911	0.88	0.863	0.61	0.5	0.493
chr13	117430039	117430142	1	LTR/ERVK/RMER13B	0		0		0	-172229	Hcn1	-0.358	2e-23	0.935	0.876	0.881	0.907	0.56	0.535	0.53
chr10	116024315	116024333	1	LINE/L1/L1Md_Gf	0		1	Ptprr	0	5962	Ptprr	-0.357	8e-16	0.927	0.947	0.923	0.933	0.641	0.633	0.45
chr11	90029530	90029700	0		0		0		0	-732	Tmem100	-0.357	2e-10	0.564	0.678	0.663	0.706	0.181	0.306	0.291
chr11	33873406	33873574	0		0		1	Kcnip1	0	-29905	Kcnip1	-0.357	2e-10	0.714	0.733	0.692	0.715	0.391	0.322	0.356
chr6	99857589	99857750	0		0		0		0	-131278	Prok2	-0.357	8e-11	0.812	0.899	0.87	0.801	0.444	0.456	0.566
chr4	64017229	64017361	0		1	Tnc	0		0	29720	Tnc	-0.357	2e-27	0.949	0.906	0.935	0.967	0.574	0.562	0.61
chrX	73096845	73096924	0		0		1	Xlr3a	0	211	Xlr3a	-0.357	7e-28	0.731	0.737	0.775	0.799	0.471	0.407	0.329
chr2	43931222	43931510	1	LTR/ERVK/RLTR34D_MM	0		1	Arhgap15	0	133958	Arhgap15os	-0.355	2e-24	0.919	0.941	0.928	0.932	0.544	0.65	0.531
chr10	120239141	120239223	1	LTR/ERVK/RLTR34B_MM	0		0		0	12123	Llph	-0.355	6e-22	0.851	0.873	0.85	0.828	0.513	0.53	0.444
chr5	116130934	116131103	0		1	Ccdc60	1	Ccdc60	0	-47772	Tmem233	-0.355	1e-36	0.825	0.854	0.859	0.838	0.502	0.449	0.514
chr16	25041001	25041123	0		0		0		0	-18576	A230028O05Rik	-0.354	4e-30	0.907	0.909	0.895	0.9	0.579	0.554	0.516
chr9	95805356	95805568	0		0		1	Pls1	0	39817	Pls1	-0.354	5e-13	0.846	0.866	0.857	0.849	0.513	0.4	0.586
chr2	118271690	118271815	1	LTR/ERVK/RLTR17	0		0		0	-14786	Fsip1	-0.352	1e-28	0.93	0.903	0.943	0.947	0.618	0.602	0.515
chr16	50832789	50832882	0		0		0		0	-100063	5330426P16Rik	-0.352	3e-33	0.867	0.862	0.884	0.816	0.498	0.535	0.482
chr8	92004727	92004794	1	LTR/ERVK/RLTR20B3A_MM	0		0		0	-203106	Irx3	-0.352	2e-29	0.766	0.717	0.692	0.661	0.385	0.35	0.339
chr14	17884948	17885084	0		0		1	Thrb	0	-96627	Thrb	-0.349	6e-24	0.872	0.845	0.869	0.906	0.462	0.546	0.566
chr2	46296905	46296998	1	LINE/L1/L1Md_T	0		0		0	600348	1700019E08Rik	-0.348	2e-30	0.657	0.648	0.655	0.609	0.312	0.297	0.273
chr5	111842661	111842760	0		0		0		0	-80982	E130006D01Rik	-0.348	5e-31	0.586	0.66	0.646	0.657	0.325	0.234	0.308
chr3	41497738	41497786	0		0		0		0	-4563	C430002E04Rik	-0.348	8e-36	0.48	0.495	0.522	0.457	0.171	0.109	0.14
chr11	100349419	100349559	0		1	Hap1	0		0	6652	Hap1	-0.348	2e-16	0.826	0.834	0.855	0.831	0.545	0.438	0.484
chr6	133092311	133092446	0		0		0		0	-12860	2700089E24Rik	-0.348	2e-19	0.816	0.822	0.808	0.808	0.454	0.454	0.488
chr10	3267502	3267587	0		0		1	H60c	0	227	H60c	-0.347	3e-34	0.761	0.792	0.797	0.819	0.495	0.415	0.426
chr17	25590420	25590540	0		0		1	Lmf1	0	11307	Lmf1	-0.347	1e-05	0.972	0.955	0.951	0.95	0.626	0.579	0.632
chrX	142631943	142632175	0		0		0		0	-49340	Tmem164	-0.346	7e-27	0.734	0.743	0.79	0.749	0.368	0.486	0.37
chr7	28983373	28983440	0		1	Map4k1	1	Map4k1	0	553	Map4k1	-0.345	1e-22	0.76	0.722	0.712	0.702	0.381	0.42	0.331
chr6	83599361	83599447	0		0		0		0	-26900	Stambp	-0.345	8e-30	0.388	0.333	0.317	0.418	0.026	0.015	0.016
chr10	116711061	116711156	0		0		0		0	18069	1700030O20Rik	-0.343	1e-18	0.781	0.76	0.797	0.729	0.397	0.429	0.443
chr4	45322695	45322817	0		0		0		0	-2153	Exosc3	-0.343	1e-27	0.789	0.79	0.778	0.772	0.406	0.399	0.514
chr19	38275251	38275439	0		0		1	Lgi1	0	10564	Lgi1	-0.343	1e-11	0.881	0.87	0.908	0.923	0.515	0.596	0.545
chr16	92001281	92001428	0		0		0		0	-56967	Slc5a3	-0.343	2e-20	0.585	0.629	0.687	0.564	0.277	0.286	0.257
chr1	40968217	40968302	0		0		0		0	162660	Tmem182	-0.343	2e-29	0.833	0.825	0.85	0.884	0.471	0.497	0.544
chr17	88123381	88123425	0		0		0		0	-2108	Gm4832	-0.342	4e-08	0.812	0.943	0.908	0.963	0.578	0.636	0.48
chr4	154655170	154655302	0		0		0		0	12631	Actrt2	-0.342	5e-21	0.858	0.911	0.915	0.896	0.58	0.492	0.587
chr18	64428374	64428694	0		0		0		1	60532	Fech	-0.342	2e-26	0.907	0.895	0.901	0.887	0.566	0.532	0.567
chr1	9639127	9639199	0		0		0		0	-8071	2610203C22Rik	-0.341	5e-24	0.695	0.642	0.659	0.673	0.254	0.351	0.371
chr9	71601999	71602264	0		0		0		0	-9772	Myzap	-0.34	3e-39	0.93	0.914	0.949	0.926	0.547	0.677	0.544
chr10	95680828	95681012	0		0		0		0	-116753	Nudt4	-0.34	2e-15	0.477	0.498	0.538	0.54	0.146	0.194	0.181
chr13	70486009	70486103	0		0		0		0	-87184	1700100L14Rik	-0.339	1e-32	0.704	0.63	0.676	0.643	0.364	0.306	0.305
chr12	17174785	17174859	0		1	Kcnf1	0		0	2066	Kcnf1	-0.338	3e-33	0.75	0.733	0.741	0.764	0.383	0.384	0.461
chr11	82925943	82926084	0		1	Unc45b	0		0	14762	Unc45b	-0.338	2e-19	0.714	0.814	0.757	0.695	0.296	0.476	0.449
chr9	121938098	121938314	0		1	1700048O20Rik	1	1700048O20Rik	0	932	1700048O20Rik	-0.338	7e-37	0.354	0.407	0.468	0.405	0.097	0.033	0.08
chrX	73242744	73243121	0		1	Xlr4c	1	Xlr4c	0	198	Xlr4c	-0.338	3e-11	0.935	0.859	0.883	0.892	0.463	0.634	0.563
chr16	50526183	50526323	0		1	G730013B05Rik	0		0	9	G730013B05Rik	-0.337	1e-16	0.984	0.965	0.948	0.969	0.698	0.57	0.618
chr2	151476726	151476862	0		0		0		0	-643	4921509C19Rik	-0.336	9e-26	0.692	0.821	0.773	0.745	0.419	0.386	0.456
chr14	118712862	118713024	0		0		0		0	-6724	Abcc4	-0.335	8e-11	0.727	0.769	0.795	0.763	0.438	0.4	0.444
chr19	11878435	11878614	0		0		0		1	-7310	Olfr1419	-0.335	3e-12	0.644	0.683	0.6	0.645	0.336	0.311	0.278
chr7	130040682	130040760	0		0		0		0	78557	Gm4265	-0.335	8e-36	0.743	0.744	0.752	0.706	0.417	0.372	0.415
chr12	76216766	76216993	0		1	Tex21	1	Tex21	0	29866	Tex21	-0.334	9e-19	0.78	0.609	0.681	0.801	0.362	0.412	0.376
chr17	88160591	88160934	1	LTR/ERV1/MERV1_I-int	0		0		0	35251	Gm4832	-0.333	2e-38	0.758	0.818	0.841	0.826	0.525	0.434	0.473
chr11	15778359	15778452	1	LINE/L1/L1Md_T	0		0		0	-479317	Vstm2a	-0.333	1e-08	0.891	0.872	0.805	0.937	0.536	0.353	0.74
chr14	32628909	32628979	0		0		1	Prrxl1	0	29018	Prrxl1	-0.332	2e-14	0.469	0.57	0.59	0.514	0.165	0.225	0.228
chr4	139556031	139556420	0		0		1	Iffo2	0	-18493	Iffo2	-0.332	2e-12	0.725	0.726	0.7	0.741	0.408	0.298	0.5
chr5	75828986	75829053	1	LINE/L2/L2a	0		0		0	149408	Kdr	-0.332	3e-33	0.911	0.888	0.866	0.908	0.554	0.522	0.606
chr10	43667094	43667189	0		0		0		0	73716	F830002L21Rik	-0.331	8e-29	0.625	0.683	0.671	0.639	0.329	0.352	0.289
chr4	10032602	10032703	1	LTR/ERVK/RMER13B	0		0		0	-115255	4930448K20Rik	-0.331	6e-18	0.715	0.726	0.641	0.73	0.335	0.421	0.359
chr5	116647587	116647679	0		0		0		0	-55816	Srrm4	-0.331	3e-33	0.939	0.944	0.963	0.962	0.714	0.531	0.615
chr14	17636611	17636730	1	LTR/ERVK/RMER17B	0		0		0	-24289	Thrb	-0.331	3e-22	0.836	0.875	0.911	0.85	0.53	0.501	0.58
chr3	96185291	96185418	0		1	Sv2a	0		0	4128	Sv2a	-0.33	1e-15	0.89	0.923	0.903	0.909	0.52	0.544	0.66
chr12	75749007	75749159	0		0		0		0	-13354	Sgpp1	-0.329	4e-17	0.742	0.797	0.722	0.732	0.352	0.439	0.466
chr7	44497477	44497595	0		1	Fam71e1	1	Fam71e1	0	949	Fam71e1	-0.329	7e-22	0.703	0.756	0.733	0.71	0.401	0.415	0.376
chr10	103993532	103993678	1	LINE/L1/L1Md_Gf	0		0		0	-149381	Gm6763	-0.329	7e-32	0.885	0.837	0.881	0.836	0.544	0.53	0.518
chr17	48647494	48647826	0		0		0		0	192760	Unc5cl	-0.329	3e-35	0.371	0.464	0.442	0.406	0.107	0.034	0.131
chr17	45748550	45748623	0		0		0		0	-14742	1600014C23Rik	-0.328	3e-06	0.838	0.843	0.79	0.803	0.468	0.463	0.54
chr3	9107775	9107880	0		0		0		0	45865	4930539M17Rik	-0.327	1e-06	0.769	0.809	0.802	0.789	0.507	0.417	0.471
chr10	67427417	67427579	0		0		0		0	-110370	Egr2	-0.327	0.0001	0.524	0.533	0.497	0.525	0.133	0.236	0.209
chr3	84438357	84438638	0		0		0		0	40993	Fhdc1	-0.327	9e-07	0.586	0.624	0.661	0.647	0.382	0.264	0.235
chr1	55103605	55104067	2	LTR/ERVK/RMER13B--LTR/ERV1/MERV1_I-int	0		0		0	15689	Hspe1	-0.327	2e-20	0.524	0.55	0.667	0.542	0.275	0.23	0.213
chr5	58000596	58000647	1	LINE/L1/L1Md_Gf	0		1	Pcdh7	0	282602	Pcdh7	-0.327	8e-36	0.881	0.85	0.886	0.872	0.504	0.563	0.558
chr17	47065108	47065242	0		0		0		0	-54643	Ubr2	-0.326	3e-18	0.798	0.879	0.833	0.83	0.481	0.483	0.565
chr13	45620806	45620884	0		0		1	Atxn1	0	113377	Gmpr	-0.325	3e-26	0.769	0.769	0.784	0.716	0.429	0.408	0.468
chr18	68111973	68112130	0		0		1	Ldlrad4	0	148921	Mir7219	-0.325	1e-07	0.734	0.783	0.749	0.702	0.421	0.422	0.403
chr8	48817133	48817333	0		0		0		0	-142543	Tenm3	-0.325	6e-05	0.556	0.763	0.662	0.587	0.277	0.28	0.392
chr15	101568123	101568300	0		1	Krt75	1	Krt75	0	-5262	4732456N10Rik	-0.325	0.0003	0.666	0.611	0.737	0.8	0.452	0.292	0.394
chr9	110678889	110679108	1	LTR/ERVK/RLTR11A2	0		1	Ccdc12	0	22496	Ccdc12	-0.324	3e-15	0.65	0.693	0.659	0.717	0.354	0.376	0.335
chr12	110046354	110046406	0		0		0		0	111693	3110009F21Rik	-0.324	9e-09	0.739	0.785	0.855	0.747	0.492	0.504	0.379
chr5	48644073	48644111	1	LINE/L1/L1Md_T	0		1	Kcnip4	0	-44410	Kcnip4	-0.324	3e-33	0.973	0.948	0.972	0.964	0.653	0.675	0.59
chr11	29824070	29824291	0		1	4931440F15Rik	1	Eml6	0	1488	4931440F15Rik	-0.323	9e-07	0.819	0.77	0.74	0.908	0.555	0.504	0.399
chr3	98274375	98274430	1	LTR/ERVK/RMER17B	0		0		0	-6028	Hmgcs2	-0.323	2e-07	0.86	0.749	0.762	0.862	0.556	0.414	0.486
chr6	140192594	140192745	1	LINE/L1/Lx9	0		0		0	151146	Capza3	-0.323	2e-23	0.822	0.822	0.816	0.835	0.507	0.49	0.505
chr6	23235811	23235893	1	LINE/L1/Lx2A1	0		0		0	12412	Fezf1	-0.323	7e-27	0.895	0.846	0.852	0.851	0.564	0.52	0.531
chr8	122444499	122444584	0		1	9330133O14Rik	0		0	887	9330133O14Rik	-0.322	4e-24	0.576	0.639	0.645	0.688	0.286	0.301	0.359
chr16	36199369	36199478	0		0		0		0	-1538	Gm6815	-0.321	1e-37	0.457	0.514	0.457	0.391	0.073	0.122	0.207
chr1	105284386	105284620	0		1	Rnf152	0		0	72207	Rnf152	-0.321	2e-31	0.76	0.753	0.8	0.785	0.496	0.412	0.452
chr10	118601336	118601468	0		0		0		0	-44877	Tmevpg1	-0.321	1e-24	0.822	0.867	0.871	0.85	0.49	0.439	0.664
chr17	51677691	51678208	1	LTR/ERVK/RLTR17	0		0		0	134104	Satb1	-0.32	5e-12	0.892	0.942	0.916	0.911	0.683	0.488	0.707
chr3	126155096	126155269	1	LTR/ERVK/RLTR50B	0		0		0	-208669	Arsj	-0.32	4e-07	0.75	0.794	0.758	0.768	0.483	0.408	0.45
chr4	148826364	148826515	0		0		1	Casz1	0	22049	Casz1	-0.32	3e-10	0.57	0.685	0.686	0.616	0.325	0.275	0.355
chr15	91710032	91710158	0		0		1	Lrrk2	0	36872	Lrrk2	-0.32	3e-21	0.591	0.642	0.595	0.612	0.309	0.252	0.31
chr2	170528366	170528495	0		0		0		0	-16503	Gm16796	-0.32	8e-33	0.951	0.945	0.952	0.947	0.581	0.537	0.765
chr10	69295945	69296181	0		0		0		0	56849	Cdk1	-0.319	3e-35	0.889	0.879	0.856	0.863	0.56	0.539	0.561
chr17	71256197	71256456	0		1	Emilin2	1	Emilin2	0	51673	Lpin2	-0.319	2e-18	0.859	0.786	0.815	0.797	0.481	0.499	0.505
chrX	168779110	168779231	0		0		0		0	-15928	Arhgap6	-0.318	3e-10	0.777	0.72	0.764	0.803	0.406	0.405	0.527
chr10	29030453	29030615	0		0		0		0	-44228	2310057J18Rik	-0.318	1e-28	0.802	0.875	0.83	0.818	0.537	0.48	0.519
chr2	17671336	17671412	1	LTR/ERVK/RMER13B	0		1	Nebl	0	59694	Nebl	-0.316	2e-28	0.906	0.922	0.907	0.925	0.596	0.586	0.612
chr5	74126373	74126485	0		0		0		0	32900	Snora26	-0.316	2e-34	0.505	0.448	0.541	0.507	0.181	0.203	0.167
chr4	153936827	153936918	0		0		0		0	13604	BC039966	-0.316	1e-35	0.801	0.815	0.832	0.818	0.508	0.466	0.525
chr8	36163965	36164023	0		0		0		0	69167	D8Ertd82e	-0.316	3e-27	0.817	0.824	0.849	0.773	0.463	0.503	0.534
chr1	35763480	35763586	2	Other/Other/RMER1B--Other/Other/RMER1A	0		0		0	-240900	Mir7669	-0.316	8e-18	0.692	0.678	0.734	0.674	0.424	0.327	0.383
chr7	25598182	25598260	1	LTR/ERVK/RLTR20B2	0		0		0	17671	Erich4	-0.315	3e-25	0.885	0.88	0.859	0.905	0.588	0.519	0.593
chr11	96713781	96713876	0		0		1	Skap1	0	63727	Snx11	-0.315	2e-15	0.417	0.469	0.482	0.5	0.154	0.143	0.155
chr17	65558647	65558751	0		0		0		0	-17917	Tmem232	-0.315	1e-30	0.553	0.635	0.587	0.673	0.364	0.224	0.303
chr13	23717186	23717293	0		0		0		0	-6429	Hfe	-0.315	5e-16	0.649	0.506	0.555	0.567	0.3	0.217	0.246
chr1	145509629	145509752	1	LINE/L1/Lx3B	0		0		0	-734269	Rgs18	-0.314	9e-21	0.848	0.846	0.873	0.901	0.587	0.582	0.492
chr3	38202421	38202514	0		0		0		0	5651	5430434I15Rik	-0.313	7e-19	0.685	0.725	0.734	0.756	0.473	0.438	0.327
chr17	76075494	76075645	0		0		0		0	214548	Gm4710	-0.313	7e-13	0.839	0.889	0.889	0.817	0.577	0.46	0.604
chr1	36115712	36115812	1	LTR/ERV1/RLTR14-int	0		0		0	28551	Mir6897	-0.312	7e-31	0.78	0.777	0.789	0.784	0.45	0.49	0.472
chr7	79375490	79375588	0		1	Rlbp1	0		0	11488	Rlbp1	-0.312	4e-25	0.739	0.798	0.731	0.721	0.435	0.401	0.466
chr4	128395004	128395166	0		1	Csmd2	1	Csmd2	0	-134190	Hmgb4	-0.311	1e-22	0.894	0.916	0.923	0.938	0.626	0.58	0.617
chrX	140433960	140434126	0		0		0		0	-22559	Prps1	-0.311	0.003	0.847	0.843	0.833	0.764	0.37	0.677	0.485
chr16	30444796	30445000	1	LTR/ERVK/RMER17B	0		0		0	-56368	Atp13a3	-0.31	3e-06	0.483	0.497	0.544	0.518	0.245	0.165	0.193
chr15	29395442	29395578	1	LINE/L1/L1Md_T	0		0		0	-777082	Ctnnd2	-0.309	2e-35	0.844	0.873	0.869	0.841	0.493	0.668	0.499
chr7	29085771	29086034	0		1	Ryr1	0		1	-2208	Mir1963	-0.309	3e-29	0.827	0.806	0.822	0.826	0.604	0.451	0.476
chr8	97802109	97802238	1	LINE/L1/L1Md_T	0		0		0	-1209712	Gm15679	-0.308	8e-28	0.915	0.924	0.936	0.914	0.635	0.621	0.587
chr14	78537712	78537861	0		0		0		0	-926	Akap11	-0.308	8e-05	0.428	0.512	0.423	0.536	0.197	0.222	0.083
chr16	37854259	37854410	0		0		0		0	-14065	Lrrc58	-0.307	3e-12	0.744	0.832	0.831	0.778	0.376	0.622	0.473
chr15	97339448	97339519	0		0		1	Pced1b	0	-92197	Amigo2	-0.307	4e-07	0.761	0.853	0.801	0.672	0.437	0.414	0.544
chr5	119257759	119258008	0		0		0		0	-57866	Gm7538	-0.307	4e-36	0.639	0.641	0.582	0.683	0.262	0.384	0.34
chr14	34143227	34143339	0		0		0		0	9136	Npy4r	-0.307	6e-20	0.816	0.863	0.886	0.858	0.586	0.551	0.508
chr5	54974393	54974590	1	LINE/L1/L1Md_Gf	0		0		0	624501	Gm10440	-0.306	8e-33	0.552	0.471	0.604	0.545	0.229	0.224	0.257
chr15	84772638	84772755	0		0		0		0	-52430	Gm20556	-0.306	9e-33	0.912	0.909	0.911	0.917	0.633	0.592	0.594
chr16	95608566	95608611	1	LTR/ERVK/RLTR31A_Mm	0		0		0	-21995	Erg	-0.305	2e-29	0.886	0.907	0.931	0.886	0.676	0.523	0.591
chr7	32484104	32484213	0		0		0		0	42618	Scgb1b29	-0.305	8e-12	0.627	0.651	0.662	0.644	0.319	0.364	0.34
chr5	64374846	64375009	0		0		0		0	93014	1700027F09Rik	-0.305	3e-32	0.782	0.838	0.84	0.849	0.481	0.502	0.582
chr6	8074293	8074519	1	LTR/ERVK/RMER13B	0		1	Col28a1	0	118211	Col28a1	-0.305	9e-25	0.857	0.855	0.838	0.871	0.51	0.589	0.552
chr17	70516363	70516426	0		1	Dlgap1	0		1	-5715	Dlgap1	-0.305	7e-39	0.827	0.806	0.832	0.801	0.491	0.493	0.554
chr13	17949592	17949671	0		0		0		0	-5415	Rala	-0.305	8e-36	0.842	0.846	0.806	0.812	0.502	0.469	0.594
chr2	160059160	160059234	0		0		0		0	42545	9130015L21Rik	-0.304	1e-14	0.92	0.898	0.881	0.882	0.544	0.499	0.729
chr11	114592182	114592328	0		0		1	Mir466n	0	-76287	Rpl38	-0.304	4e-05	0.857	0.94	0.854	0.835	0.613	0.514	0.575
chr2	170094418	170094544	0		0		0		0	-23703	A630075F10Rik	-0.303	1e-35	0.932	0.896	0.926	0.904	0.629	0.622	0.583
chr10	35037560	35037674	0		0		0		0	554218	Frk	-0.303	1e-13	0.875	0.868	0.895	0.867	0.615	0.522	0.58
chr10	26168584	26168752	1	LTR/ERVK/RLTR10-int	0		0		0	-61038	Samd3	-0.303	7e-11	0.844	0.918	0.915	0.938	0.532	0.571	0.7
chr2	84194929	84195268	1	LINE/L1/L1Md_T	0		0		0	230168	Calcrl	-0.303	8e-31	0.751	0.7	0.713	0.68	0.388	0.4	0.438
chr12	80720674	80720888	0		1	Plekhd1	1	Plekhd1	0	28181	Plekhd1	-0.303	6e-36	0.729	0.751	0.723	0.74	0.403	0.448	0.446
chr4	110717844	110718266	1	LINE/L1/L1Md_T	0		1	Agbl4	0	320358	Agbl4	-0.303	2e-32	0.851	0.815	0.824	0.833	0.59	0.512	0.495
chr5	75934327	75934403	0		1	Kdr	0		0	44063	Kdr	-0.303	3e-33	0.868	0.819	0.835	0.817	0.482	0.567	0.546
chr17	47574256	47574451	0		0		1	Ccnd3	0	-19112	Ccnd3	-0.302	7e-08	0.684	0.745	0.725	0.754	0.517	0.377	0.387
chr7	6759856	6760019	0		0		1	Usp29	0	29356	Usp29	-0.302	5e-09	0.566	0.647	0.656	0.68	0.295	0.368	0.337
chrX	61709857	61710114	0		1	Ldoc1	0		0	371	Ldoc1	-0.301	2e-11	0.744	0.53	0.452	0.72	0.224	0.479	0.226
chr14	66177972	66178081	0		1	Ptk2b	1	Ptk2b	0	35526	Ptk2b	-0.301	2e-14	0.739	0.799	0.722	0.667	0.458	0.361	0.474
chr9	20354807	20355011	1	LINE/L1/L1Md_T	0		1	Zfp560	0	-18815	Olfr18	-0.3	2e-40	0.783	0.823	0.808	0.813	0.546	0.503	0.47
chr10	118676544	118676643	0		0		0		0	-120069	Tmevpg1	-0.3	4e-16	0.638	0.653	0.729	0.692	0.382	0.374	0.379
chr5	75933751	75933848	0		1	Kdr	0		0	44628	Kdr	-0.299	1e-30	0.779	0.803	0.848	0.768	0.53	0.516	0.453
chr6	5482244	5482394	0		0		0		0	13959	Pdk4	-0.299	0.009	0.848	0.816	0.759	0.741	0.574	0.346	0.556
chr5	63875051	63875153	0		0		1	0610040J01Rik	0	62608	0610040J01Rik	-0.299	9e-26	0.736	0.65	0.698	0.76	0.37	0.437	0.426
chr7	3164099	3164219	0		1	AU018091	0		0	5044	AU018091	-0.299	6e-22	0.861	0.832	0.787	0.8	0.497	0.541	0.526
chr17	36285551	36285666	0		1	H2-M10.2	1	H2-M10.2	0	813	H2-M10.2	-0.299	3e-23	0.832	0.817	0.81	0.796	0.549	0.471	0.523
chr10	84308896	84309071	0		0		0		0	131487	Nuak1	-0.298	5e-17	0.89	0.948	0.905	0.854	0.603	0.621	0.574
chr19	56474418	56474546	0		0		1	Plekhs1	0	12846	Plekhs1	-0.298	9e-29	0.963	0.928	0.898	0.915	0.638	0.575	0.67
chr8	90490719	90490820	0		0		0		0	-142518	Tox3	-0.298	3e-32	0.814	0.882	0.867	0.889	0.602	0.511	0.583
chr1	117289035	117289159	1	LTR/ERV1/RLTR5_Mm	0		0		0	1022035	Tsn	-0.298	4e-13	0.773	0.626	0.823	0.808	0.49	0.58	0.31
chr2	168987765	168987919	0		0		0		0	9574	1700017J07Rik	-0.297	3e-07	0.821	0.869	0.771	0.746	0.402	0.487	0.558
chr5	91729193	91729247	0		0		0		0	38080	1700063O14Rik	-0.297	9e-10	0.903	0.822	0.922	0.931	0.59	0.56	0.634
chr7	110648553	110648717	0		0		0		0	20967	Adm	-0.297	2e-07	0.844	0.895	0.88	0.826	0.571	0.458	0.67
chr4	24866021	24866128	1	LTR/ERVK/ERVB7_3-LTR_MM	0		0		0	-14988	Klhl32	-0.297	2e-20	0.512	0.542	0.511	0.539	0.279	0.155	0.254
chr12	86761329	86761522	0		0		1	Lrrc74a	0	27058	Lrrc74a	-0.297	1e-35	0.768	0.777	0.778	0.778	0.52	0.416	0.494
chr4	41475683	41475748	0		0		1	Nudt2	0	10569	Nudt2	-0.297	0.0002	0.748	0.788	0.791	0.744	0.444	0.511	0.455
chr18	64493638	64493719	0		0		0		0	-4612	Fech	-0.297	4e-28	0.586	0.527	0.649	0.575	0.248	0.312	0.3
chr11	24864886	24865036	0		0		0		0	-134239	Gm10466	-0.297	3e-18	0.749	0.732	0.673	0.72	0.375	0.451	0.436
chr13	60227031	60227147	0		0		0		0	21619	Gm5084	-0.297	5e-15	0.666	0.702	0.689	0.721	0.387	0.415	0.392
chr4	74228018	74228087	0		0		0		0	-14444	Kdm4c	-0.297	4e-13	0.848	0.868	0.867	0.823	0.488	0.619	0.554
chr11	96713280	96713354	0		0		1	Skap1	0	64238	Snx11	-0.296	8e-06	0.715	0.815	0.755	0.812	0.386	0.622	0.426
chr10	78520323	78520409	0		0		0		0	-54133	Ilvbl	-0.296	1e-29	0.622	0.612	0.566	0.657	0.354	0.337	0.262
chr13	97365601	97365875	0		0		0		0	-69231	Lincenc1	-0.295	2e-33	0.432	0.394	0.388	0.393	0.096	0.098	0.127
chr10	93443050	93443159	1	LTR/ERVL/RLTR28	0		0		0	-10291	Lta4h	-0.295	2e-16	0.918	0.896	0.884	0.856	0.616	0.569	0.595
chr2	155614128	155614252	0		1	Myh7b	1	Myh7b	0	2948	Myh7b	-0.294	6e-10	0.522	0.6	0.604	0.584	0.318	0.251	0.282
chr3	9057950	9058127	1	LTR/ERVK/RLTR9E	0		0		0	-3925	4930539M17Rik	-0.293	1e-07	0.889	0.863	0.871	0.857	0.593	0.563	0.577
chr10	57782021	57782158	1	LTR/ERVK/RMER17B	0		0		0	-2832	Fabp7	-0.293	3e-13	0.889	0.88	0.882	0.791	0.517	0.558	0.629
chr4	153929560	153929625	0		0		0		0	20884	BC039966	-0.293	1e-26	0.759	0.732	0.782	0.731	0.426	0.497	0.449
chr10	26949603	26949790	0		0		0		0	177185	Arhgap18	-0.292	4e-23	0.797	0.806	0.798	0.796	0.511	0.49	0.52
chr4	127861876	127861968	0		0		0		0	108919	CK137956	-0.292	3e-16	0.799	0.789	0.796	0.737	0.495	0.459	0.51
chr11	118135873	118135957	0		0		0		0	-6696	Dnah17	-0.292	8e-21	0.832	0.764	0.789	0.79	0.497	0.542	0.467
chr18	32133078	32133190	0		1	Proc	1	Proc	0	5071	Proc	-0.292	1e-27	0.654	0.687	0.651	0.6	0.372	0.303	0.394
chr6	142879144	142879255	0		0		1	St8sia1	0	64970	Gm7457	-0.292	2e-16	0.549	0.641	0.665	0.637	0.315	0.272	0.407
chr10	121247087	121247256	0		0		0		0	64017	Tbc1d30	-0.292	1e-09	0.834	0.854	0.832	0.871	0.488	0.65	0.529
chr8	61532154	61532278	0		0		1	Palld	0	44483	Cbr4	-0.291	2e-07	0.607	0.519	0.558	0.453	0.246	0.166	0.318
chr3	84730236	84730397	0		0		0		0	64125	Tmem154	-0.291	3e-13	0.871	0.846	0.866	0.907	0.596	0.669	0.479
chr1	51459471	51459568	0		0		0		0	18879	Nabp1	-0.29	4e-20	0.696	0.758	0.688	0.722	0.42	0.403	0.455
chr16	92507938	92508014	0		0		1	Clic6	0	9830	Clic6	-0.29	8e-28	0.832	0.844	0.855	0.846	0.553	0.564	0.543
chr2	159227964	159228044	1	LTR/ERVK/RMER17B2	0		0		0	433198	Dhx35	-0.29	5e-21	0.813	0.828	0.845	0.822	0.55	0.484	0.575
chr2	135067168	135067226	1	LTR/ERVK/RLTR26_Mus	0		1	Plcb1	0	148419	4930545L23Rik	-0.289	5e-22	0.874	0.898	0.872	0.829	0.576	0.559	0.598
chr8	31091924	31092068	0		1	Dusp26	0		0	2335	Dusp26	-0.289	1e-05	0.825	0.72	0.808	0.787	0.48	0.538	0.471
chr12	9429498	9429597	0		0		0		0	141037	1700022H16Rik	-0.289	1e-33	0.763	0.674	0.737	0.706	0.418	0.437	0.436
chrX	140295577	140295675	0		0		0		0	-15321	Mir3475	-0.289	7e-16	0.753	0.665	0.67	0.774	0.316	0.529	0.436
chr17	45329140	45329247	0		0		0		0	104513	Cdc5l	-0.289	5e-23	0.805	0.838	0.85	0.822	0.553	0.565	0.501
chr17	34906694	34906829	0		1	Ehmt2	0		0	-7703	Slc44a4	-0.289	9e-13	0.946	0.944	0.924	0.938	0.643	0.718	0.586
chr7	89848746	89848866	0		0		1	Me3	0	54823	Ccdc81	-0.288	1e-16	0.861	0.952	0.898	0.848	0.559	0.625	0.622
chr2	139306915	139307059	0		0		0		0	-186932	Sptlc3	-0.288	2e-15	0.844	0.91	0.932	0.893	0.595	0.615	0.606
chr10	67928852	67929313	1	LTR/ERVL-MaLR/MLT1F-int	0		0		0	-16420	Zfp365	-0.288	5e-20	0.745	0.817	0.778	0.782	0.499	0.476	0.53
chr5	99005525	99005764	1	LINE/L1/Lx7	0		1	Prkg2	0	31435	Prkg2	-0.288	0.0002	0.722	0.722	0.771	0.783	0.359	0.368	0.657
chr16	95861226	95861329	0		0		1	1600002D24Rik	0	37435	1600002D24Rik	-0.287	6e-17	0.817	0.747	0.821	0.774	0.518	0.485	0.506
chr11	61212306	61212496	0		1	Aldh3a1	1	Aldh3a1	0	3660	Aldh3a1	-0.287	7e-13	0.331	0.405	0.336	0.475	0.055	0.101	0.145
chr17	7819893	7820241	0		0		0		0	-15093	Fndc1	-0.287	5e-09	0.899	0.921	0.868	0.914	0.547	0.653	0.639
chr13	90913959	90914079	0		0		0		0	-8664	Atp6ap1l	-0.287	1e-10	0.737	0.704	0.746	0.756	0.466	0.443	0.435
chr18	69779779	69779922	0		0		0		0	-145708	Ccdc68	-0.287	1e-19	0.301	0.306	0.357	0.303	0.038	0.024	0.026
chr2	17946234	17946390	0		0		0		0	50634	H2afb1	-0.287	5e-13	0.752	0.769	0.701	0.74	0.407	0.409	0.546
chr11	118122029	118122163	0		0		1	Dnah17	0	7123	Dnah17	-0.287	0.0004	0.897	0.838	0.785	0.783	0.694	0.417	0.504
chr5	88112166	88112923	1	LINE/L1/L1Md_Gf	0		0		0	25989	Smr2	-0.286	2e-13	0.887	0.885	0.891	0.886	0.6	0.627	0.594
chr7	70718171	70718324	0		0		0		0	-351502	Nr2f2	-0.286	7e-25	0.853	0.842	0.844	0.834	0.528	0.582	0.56
chr8	24353878	24354242	0		0		0		0	84886	1810011O10Rik	-0.285	2e-19	0.777	0.78	0.795	0.849	0.486	0.504	0.555
chr3	53421857	53421928	0		0		0		0	41366	Nhlrc3	-0.285	4e-38	0.919	0.902	0.899	0.873	0.64	0.584	0.615
chr6	56380533	56380702	1	LTR/ERVK/RMER17B	0		0		0	-10984	Pde1c	-0.285	2e-09	0.756	0.756	0.796	0.776	0.471	0.553	0.437
chr8	92206522	92206566	0		0		0		0	149576	Crnde	-0.285	0.001	0.565	0.715	0.653	0.873	0.524	0.444	0.283
chr9	56619981	56620177	0		1	Lingo1	0		1	65174	Lingo1	-0.284	2e-39	0.69	0.679	0.678	0.704	0.344	0.402	0.464
chr2	158243356	158243406	0		0		0		0	184	Mir7685	-0.284	1e-18	0.855	0.866	0.85	0.861	0.46	0.552	0.711
chr19	47239822	47240012	0		1	Neurl1a	0		0	11075	Neurl1a	-0.284	1e-34	0.598	0.601	0.646	0.579	0.333	0.282	0.351
chr3	130144907	130145073	0		0		0		0	-35854	Col25a1	-0.284	1e-05	0.848	0.785	0.892	0.824	0.637	0.686	0.335
chr16	6284179	6284299	1	LTR/ERV1/RLTR41	0		1	Rbfox1	0	308653	1700123O21Rik	-0.283	2e-15	0.744	0.724	0.803	0.744	0.523	0.384	0.506
chr14	82290941	82291065	0		0		0		0	-2152559	Pcdh17	-0.283	2e-23	0.545	0.56	0.547	0.596	0.236	0.267	0.333
chr13	15027334	15027560	1	LINE/L1/L1Md_T	0		0		0	397190	AW209491	-0.283	3e-38	0.826	0.806	0.832	0.792	0.5	0.524	0.572
chr2	7452173	7452260	1	LINE/L1/L1Md_T	0		0		0	-56018	Celf2	-0.283	8e-36	0.935	0.936	0.947	0.947	0.642	0.644	0.686
chr4	72765258	72765388	1	LTR/ERVK/RMER17D	0		0		0	87311	Aldoart1	-0.282	1e-15	0.721	0.747	0.763	0.773	0.437	0.426	0.543
chr9	102820021	102820052	0		0		0		0	-14883	Ryk	-0.282	1e-27	0.784	0.828	0.777	0.788	0.518	0.51	0.51
chr4	47285983	47286050	0		0		1	Col15a1	0	-67288	Tgfbr1	-0.282	2e-29	0.824	0.822	0.805	0.801	0.511	0.557	0.526
chr10	118782752	118782921	0		0		0		0	86067	Dyrk2	-0.281	2e-05	0.764	0.72	0.762	0.793	0.468	0.514	0.466
chr8	40898997	40899188	0		1	Slc7a2	0		1	-27140	Pdgfrl	-0.281	2e-11	0.877	0.93	0.914	0.868	0.642	0.566	0.638
chr5	21689066	21689137	1	LTR/ERVK/RMER13A	0		1	Napepld	0	12243	Napepld	-0.281	5e-21	0.658	0.742	0.737	0.714	0.418	0.391	0.488
chr10	44441736	44441893	0		1	Prdm1	0		0	16873	Prdm1	-0.281	1e-19	0.958	0.933	0.917	0.958	0.738	0.699	0.54
chr9	83498422	83498470	0		0		0		0	-49891	Sh3bgrl2	-0.281	8e-31	0.833	0.833	0.814	0.857	0.527	0.537	0.595
chr1	184628138	184628400	0		0		0		0	-70578	1700112H15Rik	-0.28	3e-16	0.874	0.877	0.852	0.88	0.538	0.609	0.621
chr16	21336401	21336481	0		0		0		0	-39569	Gm16863	-0.28	6e-20	0.688	0.712	0.658	0.665	0.37	0.397	0.436
chr19	45083620	45083848	0		0		0		0	7596	Kazald1	-0.28	1e-12	0.457	0.405	0.456	0.428	0.141	0.171	0.16
chr8	60624090	60624283	0		0		0		0	-8638	Mfap3l	-0.28	1e-05	0.759	0.764	0.799	0.851	0.45	0.459	0.637
chr14	50978469	50978918	0		0		0		0	22554	Pnp2	-0.28	4e-11	0.92	0.915	0.928	0.917	0.622	0.633	0.663
chr7	16224792	16225180	1	LTR/ERVK/RMER17B	0		0		0	-2954	Dhx34	-0.28	5e-19	0.619	0.605	0.651	0.595	0.356	0.293	0.363
chr4	56049138	56049266	0		0		0		0	-516727	Klf4	-0.28	7e-13	0.741	0.691	0.796	0.692	0.405	0.474	0.47
chr17	67939587	67939627	0		0		1	Arhgap28	0	64501	Arhgap28	-0.279	6e-13	0.606	0.619	0.671	0.678	0.366	0.384	0.344
chr11	4440893	4441249	0		1	Hormad2	0		0	11	Hormad2	-0.279	7e-35	0.529	0.578	0.581	0.549	0.303	0.291	0.245
chr3	32133914	32134020	1	LINE/L1/L1Md_F2	0		1	Kcnmb2	0	231265	Kcnmb2	-0.279	1e-10	0.851	0.837	0.883	0.876	0.628	0.495	0.623
chr4	138827225	138827291	0		0		1	Pla2g5	0	-4598	Pla2g2a	-0.278	6e-22	0.587	0.61	0.614	0.664	0.363	0.335	0.326
chr18	50122970	50123159	1	LTR/ERVK/RMER17B2	0		0		0	-5136	Hsd17b4	-0.277	3e-06	0.73	0.853	0.837	0.813	0.605	0.498	0.49
chr13	71491647	71491922	1	LINE/L1/L1Md_T	0		0		0	471939	Irx1	-0.277	3e-11	0.774	0.767	0.727	0.723	0.5	0.441	0.471
chr14	59677752	59677824	0		0		1	Atp8a2	0	52508	Shisa2	-0.276	1e-27	0.631	0.587	0.606	0.699	0.35	0.321	0.391
chr12	109779696	109779802	0		0		0		0	31872	Mir3072	-0.276	2e-25	0.796	0.853	0.848	0.837	0.562	0.519	0.589
chr2	169885550	169885675	0		1	Tshz2	0		0	185059	A630075F10Rik	-0.275	2e-15	0.88	0.851	0.855	0.888	0.597	0.63	0.551
chr15	78037645	78037821	1	LTR/ERVK/RLTR17	0		1	Cacng2	0	-66909	Eif3d	-0.275	5e-05	0.886	0.945	0.947	0.892	0.666	0.548	0.711
chr3	129256476	129256691	0		0		0		0	42653	Pitx2	-0.275	1e-22	0.381	0.48	0.446	0.449	0.228	0.115	0.15
chr1	33109031	33109132	0		0		0		0	560712	Prim2	-0.275	4e-23	0.815	0.892	0.892	0.879	0.603	0.661	0.524
chr19	21346883	21346965	1	LTR/ERVK/RLTR17	0		0		0	74647	Zfand5	-0.275	3e-31	0.908	0.917	0.962	0.922	0.705	0.605	0.647
chr4	143013669	143013762	0		0		0		0	122446	Mir7021	-0.275	1e-20	0.613	0.598	0.576	0.543	0.334	0.332	0.259
chr15	21287329	21287475	0		0		1	Cdh12	0	175951	Cdh12	-0.275	6e-11	0.809	0.852	0.788	0.814	0.494	0.56	0.567
chr15	89895224	89895352	1	LTR/ERVK/RMER13B	0		0		0	-53428	Syt10	-0.275	1e-16	0.845	0.786	0.845	0.833	0.534	0.54	0.583
chr8	25307620	25307697	0		0		0		0	-1388	5430421F17Rik	-0.274	3e-28	0.839	0.866	0.844	0.864	0.558	0.508	0.672
chr8	122322903	122323077	0		0		1	Zfpm1	0	37756	Trhr2	-0.274	2e-07	0.525	0.431	0.49	0.502	0.161	0.281	0.201
chr16	84549273	84549446	0		0		0		0	-130428	4930529L06Rik	-0.274	0.007	0.832	0.628	0.627	0.709	0.341	0.343	0.591
chr8	47763366	47763430	0		0		0		0	-49467	Cdkn2aip	-0.274	3e-29	0.717	0.722	0.724	0.797	0.498	0.462	0.439
chr2	72791705	72791797	0		0		1	6430710C18Rik	0	21966	6430710C18Rik	-0.273	9e-22	0.785	0.776	0.741	0.784	0.459	0.536	0.5
chr4	127312255	127312779	0		1	Gja4	0		0	1522	Gja4	-0.273	0.0002	0.68	0.66	0.659	0.595	0.436	0.326	0.361
chr9	26960715	26960787	0		0		0		0	-37670	Gm1110	-0.273	8e-27	0.757	0.756	0.7	0.748	0.444	0.463	0.493
chr19	36129441	36129517	0		0		0		0	-9635	Ankrd1	-0.272	5e-26	0.365	0.406	0.487	0.318	0.108	0.111	0.148
chr8	36639911	36640005	0		0		1	Dlc1	0	-26015	Dlc1	-0.272	3e-37	0.845	0.865	0.885	0.841	0.602	0.54	0.621
chr9	83460625	83460912	1	LINE/L1/L1Md_T	0		0		0	-19641	Lca5	-0.272	1e-24	0.881	0.848	0.887	0.824	0.563	0.591	0.61
chr8	48957960	48958033	0		0		0		0	-283306	Tenm3	-0.272	8e-25	0.885	0.877	0.865	0.828	0.591	0.582	0.602
chr2	169754500	169754671	0		0		1	Tshz2	0	120941	Tshz2	-0.272	3e-16	0.869	0.938	0.865	0.925	0.565	0.609	0.71
chr12	79735346	79735522	0		0		1	Rad51b	0	377579	Zfp36l1	-0.272	0.003	0.627	0.834	0.795	0.733	0.408	0.424	0.595
chr1	184675659	184675729	0		0		0		0	-36802	4930488B22Rik	-0.271	6e-27	0.536	0.522	0.524	0.468	0.21	0.234	0.28
chr10	61175039	61175136	0		0		1	Tbata	0	-173	Tbata	-0.271	4e-16	0.606	0.575	0.644	0.55	0.291	0.335	0.343
chr17	58594658	58594697	0		0		0		0	396697	2610034M16Rik	-0.27	2e-22	0.89	0.931	0.852	0.854	0.558	0.615	0.667
chr9	47274502	47274621	0		0		0		0	-255789	Cadm1	-0.27	2e-20	0.888	0.856	0.88	0.909	0.606	0.623	0.573
chr10	24107100	24107187	0		0		0		0	2390	Taar9	-0.27	4e-10	0.646	0.691	0.695	0.673	0.436	0.359	0.423
chr10	30423728	30423825	0		0		0		0	176973	Trmt11	-0.27	5e-08	0.635	0.692	0.662	0.683	0.321	0.496	0.38
chr10	130412408	130412479	0		0		0		0	17168	Vmn2r85	-0.27	5e-32	0.529	0.5	0.521	0.503	0.251	0.24	0.239
chr15	84182766	84182944	0		0		1	Pnpla3	0	-9377	Samm50	-0.27	0.0007	0.689	0.729	0.772	0.595	0.488	0.375	0.412
chr2	78060452	78060562	1	LINE/L1/Lx8b	0		1	4930440I19Rik	0	9331	4930440I19Rik	-0.269	2e-11	0.832	0.956	0.881	0.892	0.683	0.501	0.681
chr14	72980143	72980343	0		0		0		1	-45359	Gm9199	-0.269	8e-30	0.939	0.93	0.941	0.934	0.67	0.678	0.652
chr1	84405069	84405178	1	LTR/ERVK/RMER13B	0		1	Dner	0	-120479	Pid1	-0.269	2e-17	0.51	0.513	0.521	0.562	0.248	0.264	0.26
chr10	51991270	51991351	1	LINE/L1/L1Md_T	0		0		0	-31191	Vgll2	-0.269	1e-35	0.608	0.571	0.565	0.609	0.316	0.327	0.313
chr2	72471559	72471647	0		0		0		0	-4615	Cdca7	-0.268	8e-30	0.6	0.598	0.666	0.643	0.371	0.356	0.346
chr16	50482357	50482553	0		0		0		0	-43789	G730013B05Rik	-0.268	2e-16	0.337	0.35	0.252	0.336	0.03	0.059	0.061
chr19	3205621	3206055	0		0		0		0	-8135	1700030N03Rik	-0.268	5e-11	0.768	0.713	0.718	0.702	0.445	0.53	0.398
chr8	94473623	94473713	0		0		1	Nlrc5	0	906	Nlrc5	-0.268	8e-20	0.651	0.739	0.741	0.686	0.386	0.461	0.461
chr16	21653185	21653399	0		1	2510009E07Rik	0		0	41373	2510009E07Rik	-0.267	8e-06	0.759	0.776	0.833	0.766	0.484	0.565	0.502
chr3	19584756	19585428	0		0		1	Dnajc5b	0	53846	Dnajc5b	-0.267	4e-11	0.92	0.899	0.905	0.873	0.584	0.659	0.669
chr17	20627974	20628103	1	LINE/L1/L1Md_Gf	0		0		0	-3161	Fpr-rs3	-0.267	3e-13	0.907	0.819	0.91	0.868	0.551	0.692	0.581
chr17	82999744	82999901	0		0		0		0	78403	Gm19689	-0.267	7e-16	0.804	0.758	0.848	0.82	0.559	0.416	0.645
chr15	96952696	96952876	0		0		0		0	103170	Slc38a4	-0.267	3e-06	0.762	0.738	0.698	0.705	0.408	0.501	0.462
chr9	59197718	59197957	0		0		0		0	-93733	Adpgk	-0.266	2e-21	0.755	0.76	0.842	0.78	0.559	0.429	0.568
chr3	35357235	35357402	0		0		0		0	308845	Gm6639	-0.266	0.0001	0.793	0.79	0.804	0.649	0.406	0.459	0.613
chr2	52335654	52335762	0		0		1	Neb	0	3090	Neb	-0.266	2e-30	0.868	0.848	0.864	0.845	0.617	0.537	0.62
chr1	158956584	158956690	0		1	Pappa2	0		0	801	Pappa2	-0.266	1e-20	0.9	0.835	0.888	0.851	0.629	0.585	0.591
chr19	45045457	45045636	0		1	Pdzd7	0		0	226	Pdzd7	-0.266	1e-08	0.366	0.464	0.358	0.446	0.095	0.127	0.207
chr1	184615215	184615348	0		0		0		0	-57591	1700112H15Rik	-0.265	6e-16	0.856	0.88	0.924	0.877	0.591	0.691	0.575
chr5	75513159	75513250	0		0		0		0	-61782	Kit	-0.265	4e-21	0.926	0.902	0.914	0.929	0.636	0.677	0.646
chr6	140336039	140336187	0		0		0		0	-87985	Plekha5	-0.265	4e-09	0.731	0.748	0.799	0.697	0.48	0.492	0.46
chr17	25477644	25477704	0		0		0		0	6085	Tekt4	-0.265	7e-06	0.727	0.737	0.738	0.762	0.463	0.438	0.527
chr2	102420465	102420567	1	LTR/ERVL/MERVL_2A-int	0		0		0	-19616	Trim44	-0.265	6e-19	0.657	0.627	0.661	0.62	0.333	0.402	0.393
chr17	24408683	24408747	0		1	Abca3	1	Abca3	0	5798	D330041H03Rik	-0.264	2e-29	0.753	0.762	0.795	0.725	0.484	0.473	0.492
chr8	98224749	98224804	0		0		0		0	-787110	Gm15679	-0.264	7e-39	0.961	0.954	0.961	0.959	0.676	0.704	0.702
chr2	38366116	38366172	0		0		1	Lhx2	0	14837	Lhx2	-0.264	7e-20	0.845	0.793	0.73	0.718	0.507	0.502	0.512
chr1	34516761	34516891	1	LTR/ERVK/RMER4B	0		0		0	18397	Prss39	-0.264	1e-17	0.516	0.518	0.567	0.528	0.256	0.246	0.301
chrX	21714678	21715063	0		1	Slc6a14	0		0	-29	Slc6a14	-0.264	7e-07	0.708	0.551	0.584	0.662	0.214	0.516	0.357
chr3	119946569	119946675	0		0		0		0	-163234	Ptbp2	-0.264	2e-13	0.789	0.782	0.85	0.838	0.491	0.584	0.578
chr15	79627600	79627826	1	LTR/ERVK/RMER13B	0		1	Fam227a	0	-22604	Dmc1	-0.263	0.0002	0.938	0.992	0.836	0.89	0.694	0.668	0.593
chr5	120242296	120242355	1	LTR/ERVK/RMER17B	0		0		0	-103063	Gm10390	-0.263	1e-06	0.773	0.788	0.756	0.805	0.586	0.492	0.476
chrX	73082151	73082528	0		1	Xlr4a	1	Xlr4a	0	167	Xlr4a	-0.263	1e-08	0.875	0.868	0.782	0.888	0.622	0.564	0.583
chr3	152929349	152929524	0		0		1	St6galnac5	0	52771	St6galnac5	-0.263	1e-13	0.746	0.72	0.688	0.706	0.416	0.446	0.497
chr5	100728897	100728973	0		0		0		0	-9252	Hpse	-0.263	2e-19	0.843	0.87	0.803	0.772	0.521	0.531	0.622
chr1	167583921	167584067	0		0		0		0	-14367	Rxrg	-0.262	2e-06	0.676	0.726	0.661	0.662	0.311	0.412	0.534
chr12	116404503	116404587	1	LTR/ERV1/RLTR6-int	1	D430020J02Rik	0		0	616	D430020J02Rik	-0.262	4e-35	0.9	0.904	0.93	0.928	0.679	0.578	0.704
chr11	53819138	53819510	0		0		1	Gm12216	0	39932	Gm12216	-0.262	9e-13	0.818	0.848	0.853	0.854	0.548	0.564	0.631
chr8	91060769	91060907	1	Other/Other/RMER1B	0		0		0	-9218	Rbl2	-0.262	4e-20	0.605	0.695	0.705	0.581	0.326	0.358	0.467
chr2	171853552	171853638	0		0		0		0	109204	1700028P15Rik	-0.262	8e-22	0.808	0.823	0.841	0.802	0.513	0.566	0.586
chr10	87514954	87515076	1	LTR/ERVK/RLTR17	0		0		0	-6779	Pah	-0.262	2e-20	0.923	0.94	0.958	0.944	0.7	0.65	0.688
chr15	97457133	97457176	0		0		0		0	-209867	Amigo2	-0.261	3e-12	0.947	0.939	0.888	0.912	0.638	0.608	0.735
chr2	166295880	166296003	0		0		0		0	22035	Gm11468	-0.261	3e-22	0.728	0.744	0.748	0.722	0.498	0.466	0.462
chr6	121410625	121410769	0		1	Iqsec3	0		0	62981	Iqsec3	-0.261	7e-14	0.792	0.745	0.8	0.655	0.535	0.483	0.443
chr16	17506140	17506342	0		1	Aifm3	1	Aifm3	0	-2729	Lztr1	-0.261	1e-13	0.858	0.819	0.898	0.882	0.537	0.638	0.635
chr5	36357831	36357950	0		0		1	Sorcs2	0	40249	Sorcs2	-0.261	0.0002	0.87	0.895	0.769	0.785	0.561	0.487	0.644
chr8	78081344	78081480	0		0		0		0	-131929	Ttc29	-0.261	5e-08	0.735	0.676	0.622	0.591	0.426	0.423	0.336
chr2	66542971	66543069	0		1	Scn9a	1	Gm13629--Scn9a	0	91942	Scn9a	-0.26	7e-19	0.834	0.858	0.782	0.776	0.534	0.581	0.54
chr2	4985351	4985427	0		1	Ucma	0		0	9268	Ucma	-0.26	5e-18	0.779	0.756	0.816	0.767	0.474	0.538	0.547
chr8	45785110	45785310	0		1	Sorbs2	1	Sorbs2--Sorbs2os	0	34087	Sorbs2os	-0.26	6e-14	0.965	0.945	0.943	0.925	0.652	0.723	0.681
chr17	79971508	79971624	0		0		0		0	-75443	Atl2	-0.259	7e-26	0.663	0.68	0.723	0.68	0.425	0.321	0.535
chr8	36432395	36432785	1	LTR/ERVK/RMER13B	0		0		0	-56600	6430573F11Rik	-0.259	2e-23	0.9	0.893	0.889	0.902	0.58	0.647	0.669
chr8	10688498	10688574	0		0		0		0	193918	B930025P03Rik	-0.259	1e-12	0.786	0.795	0.796	0.858	0.523	0.605	0.528
chr6	15607300	15607504	1	LINE/L1/L1Md_T	0		0		0	-113258	Mdfic	-0.259	9e-29	0.904	0.895	0.91	0.902	0.617	0.623	0.688
chr8	110013500	110013731	0		0		0		0	23181	Tat	-0.259	7e-29	0.927	0.937	0.957	0.924	0.722	0.626	0.686
chr6	69802853	69803315	1	LINE/L1/L1Md_T	0		0		0	-475910	Rprl1	-0.259	6e-12	0.733	0.681	0.662	0.7	0.492	0.401	0.425
chr17	45158572	45158646	0		0		0		0	275098	Cdc5l	-0.258	3e-23	0.547	0.527	0.547	0.584	0.292	0.282	0.306
chr1	136375611	136375780	0		0		0		0	-29592	Camsap2	-0.258	7e-39	0.779	0.854	0.826	0.725	0.572	0.439	0.602
chr17	69039269	69039409	0		0		0		0	-117470	Epb4.1l3	-0.258	5e-06	0.9	0.868	0.876	0.864	0.613	0.728	0.509
chr3	35355481	35355529	0		0		0		0	310658	Gm6639	-0.258	2e-15	0.925	0.905	0.874	0.878	0.666	0.664	0.584
chr3	68691276	68691542	0		1	Il12a	1	Il12a	0	-14	Il12a	-0.258	2e-10	0.876	0.881	0.864	0.861	0.598	0.607	0.687
chr6	35871621	35871794	0		0		0		0	-331820	Mtpn	-0.258	9e-06	0.721	0.771	0.801	0.666	0.504	0.412	0.522
chr13	41341732	41341991	0		0		1	Nedd9	0	17139	Nedd9	-0.258	6e-11	0.904	0.892	0.917	0.873	0.64	0.574	0.704
chr3	127679750	127679920	0		1	Alpk1	0		0	46691	Neurog2	-0.258	2e-20	0.883	0.85	0.855	0.835	0.59	0.657	0.545
chr5	150082848	150082978	0		0		0		0	64239	Rxfp2	-0.258	4e-11	0.817	0.849	0.866	0.835	0.591	0.462	0.694
chr15	97049989	97050090	0		0		1	Slc38a4	0	5916	Slc38a4	-0.258	3e-31	0.491	0.441	0.49	0.516	0.256	0.238	0.186
chr2	163281017	163281146	0		0		1	Tox2	0	55629	Tox2	-0.258	1e-05	0.631	0.629	0.635	0.635	0.405	0.455	0.262
chr1	130422937	130422994	0		1	Daf2	0		0	33	Daf2	-0.258	1e-27	0.562	0.628	0.579	0.561	0.317	0.357	0.299
chr7	99990412	99990745	0		0		0		0	-10120	Rnf169	-0.258	1e-08	0.562	0.6	0.617	0.583	0.229	0.335	0.431
chr5	100569450	100569602	0		0		1	Plac8	0	2679	Plac8	-0.257	6e-14	0.493	0.566	0.621	0.55	0.331	0.273	0.298
chr11	52579947	52580030	1	LTR/ERVK/RMER17A2	0		0		0	183561	9530068E07Rik	-0.257	4e-10	0.766	0.795	0.852	0.771	0.567	0.476	0.576
chr4	56524479	56524579	0		0		0		0	216896	Actl7b	-0.257	9e-10	0.847	0.761	0.881	0.825	0.53	0.592	0.596
chr3	126944586	126944854	0		0		1	Ank2	0	-1334	Ank2	-0.257	2e-15	0.872	0.894	0.915	0.892	0.603	0.656	0.649
chr13	97882426	97882649	0		0		0		0	322539	Gm5086	-0.257	9e-13	0.715	0.732	0.715	0.746	0.409	0.5	0.5
chr10	21918930	21919100	0		0		1	Sgk1	0	36832	Sgk1	-0.257	7e-06	0.93	0.962	0.908	0.981	0.583	0.741	0.74
chr16	69706056	69706250	1	LINE/L1/L1Md_T	0		0		0	157591	Speer2	-0.257	1e-36	0.83	0.829	0.849	0.773	0.554	0.536	0.599
chr2	169735853	169736024	0		0		1	Tshz2	0	102293	Tshz2	-0.257	4e-09	0.889	0.904	0.922	0.908	0.694	0.537	0.715
chr4	54587229	54587625	0		0		0		0	-360517	Zfp462	-0.257	9e-05	0.785	0.776	0.79	0.75	0.452	0.519	0.584
chr14	119248745	119248811	0		0		1	Hs6st3	0	110514	Hs6st3	-0.257	4e-23	0.621	0.534	0.61	0.568	0.298	0.322	0.356
chr14	77637662	77637729	0		1	Enox1	0		0	-130828	Gm6994	-0.257	7e-19	0.84	0.815	0.819	0.794	0.458	0.66	0.564
chr14	95882099	95882226	0		1	4921530L21Rik	0		0	897	4921530L21Rik	-0.256	8e-21	0.915	0.889	0.921	0.872	0.58	0.696	0.654
chr3	152067442	152067605	0		0		0		0	98376	Gipc2	-0.256	0.0007	0.667	0.703	0.542	0.547	0.287	0.301	0.491
chr4	119087777	119087895	1	LTR/ERVK/RLTR26D_MM	0		0		0	-20908	Slc2a1	-0.256	1e-18	0.764	0.781	0.704	0.768	0.478	0.521	0.498
chr15	97098322	97098462	0		0		0		0	-42436	Slc38a4	-0.256	2e-20	0.767	0.817	0.828	0.792	0.547	0.502	0.582
chr11	61336666	61336826	0		1	Slc47a2	1	Slc47a2	0	6114	Slc47a2	-0.256	3e-18	0.891	0.903	0.914	0.932	0.62	0.652	0.692
chr16	92300730	92300839	0		0		0		0	-518	Smim11	-0.256	8e-09	0.503	0.455	0.46	0.506	0.235	0.123	0.322
chr12	76795264	76795431	0		1	Gpx2	0		0	206	Gpx2	-0.256	1e-05	0.65	0.708	0.702	0.754	0.406	0.499	0.435
chr4	153588286	153588348	0		0		0		0	-105487	Ajap1	-0.255	2e-16	0.885	0.855	0.876	0.879	0.609	0.601	0.645
chr14	120313709	120313815	0		0		1	Mbnl2	0	38094	Mbnl2	-0.254	3e-18	0.808	0.848	0.852	0.803	0.527	0.578	0.618
chr2	78598120	78598194	0		0		0		0	-270889	Ube2e3	-0.254	7e-25	0.929	0.898	0.88	0.869	0.654	0.628	0.64
chr4	65823324	65823524	1	LINE/L1/L1Md_T	0		1	Astn2	0	218439	Trim32	-0.254	2e-39	0.943	0.95	0.924	0.919	0.663	0.721	0.671
chrX	169731659	169731750	1	LTR/ERVK/RMER17B2	0		1	Mid1	0	46506	Mid1	-0.253	3e-21	0.832	0.827	0.828	0.88	0.574	0.644	0.55
chr15	94496116	94496221	0		0		0		0	47339	Pus7l	-0.253	1e-29	0.769	0.76	0.745	0.751	0.531	0.485	0.492
chr1	9058334	9058414	1	LINE/L1/L1Md_T	0		1	Sntg1	0	241503	Sntg1	-0.253	2e-19	0.781	0.855	0.893	0.78	0.538	0.496	0.687
chr13	70743427	70743675	0		0		1	Adamts16	0	98259	Adamts16	-0.252	3e-14	0.815	0.81	0.822	0.83	0.603	0.547	0.555
chr9	89187217	89187520	1	LINE/L1/L1Md_F3	0		0		0	-11904	Bcl2a1b	-0.252	6e-27	0.869	0.877	0.875	0.893	0.63	0.623	0.623
chr4	127193026	127193152	0		1	Dlgap3	1	Dlgap3	0	20210	Dlgap3	-0.252	2e-08	0.872	0.882	0.831	0.841	0.622	0.633	0.58
chr7	111471853	111471918	0		1	Galnt18	0		0	308091	Galnt18	-0.252	5e-26	0.818	0.831	0.854	0.877	0.614	0.589	0.572
chr17	82791661	82791733	0		0		0		0	286528	Gm19689	-0.252	4e-13	0.82	0.804	0.803	0.836	0.548	0.475	0.668
chrX	152209054	152209112	0		1	Iqsec2	0		0	-24143	Kdm5c	-0.252	1e-20	0.838	0.836	0.81	0.87	0.485	0.707	0.566
chr7	25192112	25192210	0		0		0		0	25564	Mir7048	-0.252	4e-28	0.831	0.848	0.847	0.845	0.605	0.596	0.57
chr8	35183745	35183904	0		0		0		0	-191916	Ppp1r3b	-0.252	1e-38	0.93	0.918	0.927	0.923	0.643	0.66	0.713
chr14	87280967	87281165	0		0		0		0	-135516	Tdrd3	-0.252	4e-26	0.953	0.932	0.947	0.952	0.72	0.668	0.697
chr10	123209041	123209130	0		0		0		0	-12067	Usp15	-0.252	7e-16	0.914	0.907	0.886	0.897	0.713	0.662	0.573
chr10	63416276	63416602	0		0		0		0	-13658	Ctnna3	-0.252	4e-13	0.627	0.694	0.75	0.692	0.503	0.385	0.431
chr15	102042409	102042503	0		0		0		0	14241	Krt18	-0.252	3e-19	0.589	0.582	0.632	0.529	0.346	0.306	0.339
chr8	36009654	36009788	0		0		0		0	-85106	D8Ertd82e	-0.251	2e-11	0.622	0.699	0.69	0.64	0.394	0.482	0.356
chr5	128781777	128782333	0		0		1	Rimbp2	1	45810	Piwil1	-0.251	5e-11	0.632	0.707	0.64	0.655	0.483	0.329	0.41
chr13	15861323	15861369	1	LTR/ERVK/RMER17B2	0		0		0	54104	A530046M15Rik	-0.251	3e-22	0.89	0.911	0.903	0.883	0.658	0.662	0.613
chr12	85428561	85428664	0		0		0		0	-45288	Fos	-0.251	0.0006	0.765	0.832	0.839	0.788	0.451	0.577	0.614
chr4	24869092	24869214	0		0		0		0	-18067	Klhl32	-0.251	2e-11	0.872	0.832	0.811	0.83	0.551	0.611	0.595
chr3	129181923	129182036	0		0		0		0	-17897	Pitx2	-0.251	1e-12	0.76	0.67	0.718	0.647	0.421	0.459	0.459
chr10	21494423	21494471	0		0		0		0	-98697	1700020N01Rik	-0.25	2e-11	0.482	0.51	0.545	0.65	0.288	0.293	0.309
chr10	99279392	99279478	0		0		0		0	16205	Dusp6	-0.25	4e-17	0.704	0.8	0.796	0.798	0.456	0.52	0.598
chr17	62899180	62899332	0		0		0		0	-17939	Efna5	-0.25	2e-08	0.774	0.765	0.909	0.833	0.552	0.492	0.67
chr5	74729770	74730132	0		0		0		0	-27048	Lnx1	-0.25	8e-16	0.767	0.749	0.75	0.805	0.507	0.535	0.514
chr13	111593385	111593477	0		0		0		0	-92746	Mier3	-0.25	2e-19	0.853	0.867	0.847	0.875	0.637	0.559	0.634
chr15	67040292	67040328	0		0		0		0	-70669	Ndrg1	-0.25	0.0007	0.657	0.63	0.62	0.642	0.448	0.298	0.42
chr17	44511315	44511524	0		0		1	Runx2	0	224756	Runx2	-0.25	1e-06	0.842	0.764	0.801	0.778	0.568	0.484	0.586
chr10	46097910	46097983	2	LTR/ERVK/RLTR26_Mus--LTR/ERVK/MERVK26-int	0		0		0	-146801	Snord14d	-0.25	3e-26	0.933	0.92	0.955	0.906	0.605	0.702	0.729
chr8	58014244	58014398	1	LINE/L1/L1Md_F2	0		1	Galntl6	0	-361266	Galnt7	-0.25	2e-05	0.719	0.707	0.755	0.623	0.518	0.381	0.454
chr15	96218202	96218446	1	LTR/ERVK/RLTR17	0		0		0	-20350	2610037D02Rik	-0.249	3e-06	0.955	0.944	0.992	0.975	0.62	0.714	0.816
chr14	61751276	61751356	1	LTR/ERVK/MLTR31FA_MM	0		0		0	-68943	Dleu2	-0.249	2e-28	0.792	0.779	0.807	0.786	0.546	0.511	0.569
chr4	119009898	119010032	0		0		0		0	47999	Lao1	-0.249	6e-13	0.795	0.728	0.742	0.717	0.486	0.534	0.472
chr7	28795821	28796218	0		1	Rinl	1	Rinl	0	7052	Rinl	-0.249	5e-19	0.767	0.796	0.77	0.783	0.584	0.527	0.481
chr7	141687501	141687628	0		0		0		0	-2775	Muc2	-0.249	9e-25	0.697	0.696	0.714	0.712	0.39	0.46	0.521
chr1	87070594	87070931	0		0		0		0	19166	Alppl2	-0.248	3e-07	0.528	0.543	0.518	0.583	0.32	0.244	0.322
chr2	159947314	159947404	0		1	4933416E03Rik	0		0	19	4933416E03Rik	-0.248	2e-18	0.747	0.71	0.728	0.708	0.458	0.556	0.413
chr10	111594759	111594871	0		0		0		0	-542	4933440J02Rik	-0.248	7e-14	0.738	0.742	0.76	0.713	0.408	0.498	0.562
chr9	7647129	7647263	1	LINE/L1/L1Md_F3	0		1	Mmp20	0	18966	Mmp20	-0.248	4e-11	0.788	0.754	0.717	0.805	0.566	0.474	0.52
chr10	20649298	20649358	1	LINE/L1/L1Md_T	0		1	Pde7b	0	75740	Pde7b	-0.248	2e-36	0.917	0.958	0.955	0.949	0.7	0.68	0.708
chr16	34649879	34650028	0		0		0		0	-1256	Ropn1	-0.248	4e-06	0.557	0.544	0.61	0.597	0.311	0.316	0.359
chr12	35909017	35909281	1	LINE/L1/L1Md_T	0		0		0	-16471	Agr3	-0.247	0.0001	0.912	0.924	0.957	0.925	0.55	0.767	0.734
chr17	40418749	40418853	0		0		0		0	-99594	Crisp1	-0.247	1e-06	0.824	0.831	0.763	0.708	0.541	0.542	0.522
chr12	34290969	34291094	0		0		1	Hdac9	0	237857	Hdac9	-0.247	3e-26	0.951	0.971	0.939	0.949	0.687	0.707	0.724
chr6	138747567	138747965	1	LINE/L1/L1Md_T	0		0		0	-89322	Igbp1b	-0.247	7e-27	0.642	0.67	0.682	0.606	0.453	0.363	0.393
chr9	71602711	71602824	0		0		0		0	-10408	Myzap	-0.247	4e-18	0.839	0.797	0.846	0.828	0.552	0.587	0.601
chr11	82175180	82175233	0		0		0		0	4606	Ccl1	-0.247	6e-11	0.551	0.604	0.543	0.591	0.267	0.338	0.374
chr1	18323568	18323776	1	LTR/ERVK/RMER17B	0		0		0	-58534	Defb41	-0.246	4e-16	0.889	0.885	0.908	0.916	0.671	0.647	0.645
chr3	131019145	131019253	0		0		0		0	-91097	Lef1	-0.246	2e-07	0.467	0.379	0.462	0.406	0.138	0.208	0.199
chr5	104396403	104396526	0		0		0		0	-38646	Spp1	-0.246	8e-14	0.736	0.748	0.686	0.724	0.42	0.494	0.509
chr9	10467889	10467993	1	LINE/L1/L1Md_F2	0		1	Cntn5	0	436785	Cntn5	-0.246	1e-09	0.697	0.757	0.658	0.689	0.343	0.518	0.497
chr9	102494639	102494720	0		0		0		0	-11457	Ky	-0.245	2e-07	0.649	0.652	0.65	0.708	0.483	0.395	0.382
chr17	32676423	32676569	0		1	Cyp4f40	0		0	-9162	Cyp4f15	-0.245	7e-09	0.279	0.408	0.324	0.304	0.034	0.118	0.099
chr12	31392438	31392578	0		0		0		0	-41037	Dld	-0.245	9e-07	0.815	0.728	0.836	0.739	0.573	0.552	0.479
chr14	70895854	70895930	0		1	Gfra2	1	Gfra2	0	5786	Gfra2	-0.245	5e-35	0.862	0.877	0.865	0.869	0.652	0.64	0.578
chr2	6133025	6133144	0		1	Gm10857	0		0	202	Gm10857	-0.245	2e-17	0.835	0.845	0.835	0.802	0.628	0.564	0.568
chr12	73685942	73686090	0		0		1	Prkch	0	100976	Prkch	-0.245	3e-16	0.789	0.787	0.757	0.829	0.494	0.58	0.561
chr4	117389489	117389643	0		0		1	Rnf220	0	107349	Rnf220	-0.245	7e-16	0.826	0.73	0.777	0.732	0.554	0.462	0.549
chr19	28763454	28763490	0		0		0		1	-71693	Slc1a1	-0.245	8e-36	0.95	0.969	0.947	0.959	0.641	0.728	0.767
chr6	100526871	100526998	0		0		0		0	-465	1700049E22Rik	-0.245	1e-16	0.663	0.713	0.706	0.697	0.444	0.41	0.497
chr5	112644135	112644254	0		0		0		0	-54198	1700034G24Rik	-0.244	4e-24	0.637	0.69	0.653	0.657	0.39	0.425	0.431
chr13	55811260	55811406	0		0		0		0	20092	Pitx1	-0.244	2e-07	0.621	0.735	0.611	0.667	0.385	0.452	0.405
chr15	60016402	60016440	0		1	4933412E24Rik	0		0	197	4933412E24Rik	-0.244	5e-05	0.867	0.78	0.815	0.825	0.472	0.596	0.667
chr8	112418564	112418724	1	LINE/L1/Lx8	0		0		0	-151398	Cntnap4	-0.244	2e-05	0.911	0.978	0.955	0.908	0.754	0.507	0.82
chr3	62573649	62573719	1	LINE/L1/L1Md_T	0		1	Gpr149	0	31456	Gpr149	-0.244	3e-33	0.924	0.933	0.933	0.932	0.643	0.728	0.69
chr8	112215456	112215545	0		0		0		0	204142	Terf2ip	-0.244	2e-21	0.857	0.907	0.884	0.871	0.585	0.72	0.603
chr6	30461771	30461891	0		0		0		0	47875	Tmem209	-0.244	3e-05	0.798	0.653	0.719	0.768	0.456	0.594	0.419
chr17	23523481	23523545	1	LTR/ERVK/ETnERV-int	0		0		0	40713	Zfp213	-0.244	6e-29	0.626	0.65	0.644	0.643	0.433	0.393	0.363
chr6	143537089	143537183	0		0		0		0	114152	1700060C16Rik	-0.243	4e-18	0.809	0.783	0.87	0.801	0.576	0.59	0.55
chr8	93627490	93627590	0		0		0		0	-91833	Ces5a	-0.243	4e-11	0.809	0.718	0.712	0.718	0.48	0.466	0.543
chr18	15894941	15895024	0		0		0		0	-176936	Chst9	-0.243	2e-13	0.838	0.811	0.812	0.811	0.577	0.576	0.574
chr12	71778138	71778233	0		0		0		0	-52881	Daam1	-0.243	3e-22	0.616	0.614	0.71	0.588	0.367	0.39	0.412
chr5	146661774	146661988	1	LTR/ERVK/RLTR17	0		0		0	-76642	Gpr12	-0.243	5e-21	0.762	0.767	0.793	0.793	0.519	0.551	0.538
chr14	94842317	94842446	1	LINE/L1/Lx2A1	0		0		0	-951713	Pcdh9	-0.243	1e-16	0.944	0.91	0.912	0.904	0.68	0.603	0.737
chr7	81063382	81063479	0		0		1	Alpk3	0	5831	Alpk3	-0.242	1e-24	0.697	0.661	0.696	0.65	0.436	0.406	0.46
chr17	80255469	80255552	0		0		1	Dhx57	0	31022	Gemin6	-0.242	2e-12	0.642	0.655	0.678	0.704	0.461	0.374	0.447
chr8	26807530	26807619	0		0		0		0	16849	2310008N11Rik	-0.242	3e-18	0.678	0.728	0.742	0.761	0.456	0.502	0.503
chr12	73408933	73409014	0		0		1	D830013O20Rik	0	589	D830013O20Rik	-0.242	6e-21	0.765	0.779	0.777	0.825	0.558	0.524	0.554
chr8	91856177	91856227	0		0		0		0	-54548	Irx3	-0.242	4e-08	0.571	0.575	0.576	0.672	0.261	0.356	0.451
chr6	86628276	86628459	0		1	Asprv1	0		0	195	Asprv1	-0.242	4e-07	0.715	0.722	0.69	0.707	0.46	0.462	0.476
chr15	10178749	10178797	0		0		1	Prlr	0	1536	Prlr	-0.242	0.0006	0.763	0.789	0.639	0.646	0.451	0.467	0.482
chr1	170294600	170294805	0		0		0		0	11630	Gm7694	-0.241	0.004	0.906	0.919	0.95	0.945	0.6	0.65	0.817
chr17	44135162	44135258	0		0		0		0	-29402	Enpp4	-0.241	9e-08	0.777	0.782	0.745	0.86	0.434	0.691	0.484
chr13	17950027	17950196	0		0		0		0	-5895	Rala	-0.241	0.001	0.816	0.747	0.919	0.775	0.534	0.518	0.667
chr3	21531019	21531129	0		0		0		0	-545577	Tbl1xr1	-0.241	1e-15	0.487	0.491	0.498	0.499	0.249	0.27	0.235
chr7	43937487	43937554	0		1	Klk15	0		0	3750	Klk15	-0.241	6e-28	0.739	0.729	0.682	0.688	0.436	0.459	0.508
chr1	186234547	186234710	0		0		0		0	-117318	Lyplal1	-0.24	7e-14	0.808	0.796	0.791	0.85	0.589	0.526	0.608
chr17	69902431	69902569	0		0		0		0	463175	A330050F15Rik	-0.24	2e-26	0.698	0.653	0.628	0.648	0.425	0.455	0.388
chr10	77178705	77178795	1	LTR/ERVK/RLTR20B3A_MM	0		0		0	-12220	Col18a1	-0.24	2e-20	0.782	0.796	0.787	0.764	0.518	0.575	0.533
chrX	86318325	86318430	0		0		0		0	36616	Gm41	-0.24	2e-14	0.847	0.944	0.933	0.907	0.718	0.594	0.69
chrX	109773198	109773253	1	LINE/L1/L1Md_T	0		0		0	576471	Gm6377	-0.24	1e-20	0.9	0.915	0.91	0.889	0.605	0.606	0.778
chr6	54523370	54523478	0		0		1	Scrn1	0	42958	Scrn1	-0.24	6e-11	0.955	0.919	0.919	0.886	0.692	0.625	0.724
chr6	144772698	144772774	0		0		0		0	99869	Sox5os3	-0.24	2e-06	0.783	0.868	0.88	0.83	0.624	0.672	0.499
chrX	114709761	114709903	1	LINE/L1/L1Md_T	0		0		0	-195179	Ube2dnl1	-0.24	4e-27	0.869	0.925	0.917	0.864	0.654	0.697	0.642
chr7	58217445	58217532	1	LTR/ERVK/RMER17B2	0		0		0	-440713	Atp10a	-0.24	3e-09	0.707	0.71	0.705	0.695	0.502	0.484	0.412
chr13	40430318	40430558	0		0		0		0	-142427	Ofcc1	-0.24	2e-10	0.649	0.697	0.737	0.714	0.456	0.447	0.473
chr16	30628553	30628643	0		0		0		0	28876	Fam43a	-0.239	2e-20	0.529	0.58	0.602	0.535	0.266	0.403	0.298
chr3	62077303	62077454	1	LINE/L1/L1Md_F3	0		0		0	-261398	Arhgef26	-0.239	0.0002	0.688	0.731	0.702	0.755	0.413	0.604	0.424
chr2	106911663	106911771	0		0		0		0	58674	Arl14ep	-0.239	3e-18	0.695	0.727	0.74	0.711	0.482	0.513	0.446
chr5	53748186	53748315	1	LINE/L1/L1Md_T	0		0		0	-40546	Cckar	-0.239	3e-23	0.942	0.88	0.931	0.921	0.654	0.689	0.693
chr10	61828168	61828558	0		0		0		0	-44499	H2afy2	-0.239	4e-15	0.856	0.891	0.881	0.895	0.601	0.615	0.709
chr14	35095475	35095582	0		0		1	Grid1	0	200920	Mir346	-0.239	3e-07	0.622	0.579	0.603	0.589	0.485	0.228	0.364
chr7	4325180	4325294	1	LTR/ERVK/RLTR26	0		0		0	-12486	Ncr1	-0.239	1e-07	0.801	0.86	0.818	0.775	0.626	0.499	0.6
chr2	75752533	75752610	0		0		0		0	-47931	Nfe2l2	-0.239	1e-19	0.835	0.826	0.848	0.829	0.521	0.63	0.635
chr13	58980101	58980198	0		0		1	Ntrk2	0	172454	Ntrk2	-0.239	2e-20	0.729	0.793	0.755	0.758	0.494	0.532	0.531
chr7	108530399	108530475	1	LINE/L1/L1Md_F2	0		0		0	-6489	Olfr502	-0.239	4e-37	0.944	0.961	0.955	0.965	0.703	0.758	0.692
chr13	42956687	42956788	0		1	Phactr1	0		0	90492	Phactr1	-0.239	1e-17	0.909	0.92	0.866	0.904	0.64	0.648	0.695
chr16	38374218	38374349	0		1	Popdc2	1	Popdc2	0	12075	Popdc2	-0.239	2e-14	0.876	0.759	0.816	0.849	0.638	0.57	0.552
chr17	18791585	18791724	1	LTR/ERVK/IAPEY3-int	0		0		0	-122667	Vmn2r97	-0.239	1e-08	0.952	0.921	0.955	0.964	0.703	0.714	0.721
chr8	103741678	103741772	0		0		0		0	137927	4933400L20Rik	-0.239	7e-14	0.632	0.714	0.72	0.699	0.464	0.451	0.441
chr8	18918800	18918911	0		0		0		0	32015	Xkr5	-0.239	1e-09	0.761	0.695	0.709	0.64	0.475	0.423	0.486
chr13	59279921	59279987	0		0		0		0	264497	Agtpbp1	-0.238	5e-06	0.924	0.96	0.956	0.909	0.68	0.583	0.833
chr7	23385800	23385924	0		1	Nlrp5	0		0	-34	Nlrp5	-0.238	6e-17	0.826	0.778	0.785	0.833	0.542	0.618	0.543
chr16	45064061	45064532	1	LTR/ERVK/RLTR10-int	0		0		0	-29756	Ccdc80	-0.238	7e-06	0.718	0.691	0.654	0.671	0.439	0.436	0.449
chr10	100653575	100653901	1	LTR/ERVK/RLTR16B_MM	0		0		0	61353	1700017N19Rik	-0.238	6e-06	0.898	0.854	0.855	0.862	0.609	0.578	0.702
chr17	24762155	24762220	0		0		0		0	9186	Hs3st6	-0.238	2e-05	0.782	0.791	0.793	0.808	0.575	0.571	0.531
chr18	12855081	12855175	0		0		1	Osbpl1a	0	7585	Osbpl1a	-0.238	3e-10	0.887	0.86	0.891	0.86	0.655	0.696	0.564
chr17	34912750	34912949	0		1	Ehmt2	1	Ehmt2	0	-1615	Slc44a4	-0.238	6e-24	0.903	0.889	0.885	0.928	0.67	0.66	0.66
chr15	76999379	76999566	0		0		0		0	23255	Mb	-0.238	0.0001	0.76	0.735	0.649	0.674	0.507	0.37	0.521
chr10	121293852	121294253	1	LTR/ERVK/RLTR16C_MM	0		1	Tbc1d30	0	17137	Tbc1d30	-0.237	3e-12	0.625	0.708	0.673	0.647	0.39	0.354	0.396
chr12	8143060	8143151	1	LTR/ERVK/RLTR17	0		0		0	-65000	1110057K04Rik	-0.237	2e-26	0.958	0.956	0.934	0.94	0.764	0.625	0.74
chr14	70009499	70009647	0		0		1	Pebp4	0	-67871	Egr3	-0.237	1e-12	0.688	0.611	0.657	0.574	0.366	0.384	0.437
chr11	42680203	42680326	0		0		0		0	260508	Gabrb2	-0.237	0.0002	0.828	0.839	0.924	0.88	0.76	0.521	0.613
chr9	14862817	14862840	0		0		1	Gpr83	0	2575	Gpr83	-0.237	2e-05	0.845	0.804	0.764	0.761	0.414	0.697	0.562
chr10	43004508	43004616	0		0		1	Sobp	0	144051	Scml4	-0.237	2e-29	0.87	0.844	0.869	0.819	0.58	0.59	0.664
chr7	83567895	83567953	0		0		0		0	-17006	Tmc3	-0.237	4e-10	0.654	0.582	0.637	0.587	0.41	0.418	0.306
chr11	94950298	94950408	0		1	Col1a1	0		0	14084	Col1a1	-0.236	6e-26	0.936	0.946	0.904	0.94	0.774	0.59	0.724
chr2	170731009	170731261	0		0		0		0	-671	Dok5	-0.236	8e-07	0.525	0.544	0.612	0.538	0.347	0.297	0.313
chr15	93005844	93005910	0		0		0		0	269207	Gxylt1	-0.236	6e-18	0.685	0.631	0.68	0.67	0.412	0.443	0.433
chr11	100348544	100348653	0		1	Hap1	1	Hap1	0	7543	Hap1	-0.236	7e-13	0.561	0.586	0.526	0.535	0.346	0.3	0.301
chr18	83192534	83192742	0		0		0		0	133246	4921531P14Rik	-0.236	0.0004	0.953	0.87	0.893	0.9	0.514	0.7	0.791
chr10	57099377	57099464	1	LINE/L1/L1Md_T	0		0		0	386933	4930467K11Rik	-0.236	2e-27	0.846	0.859	0.856	0.846	0.592	0.601	0.656
chr5	103812683	103812887	0		0		1	Aff1	0	58213	Aff1	-0.236	2e-11	0.898	0.956	0.883	0.88	0.646	0.665	0.692
chr5	60995212	60995481	1	LTR/ERVK/RMER17A2	0		0		0	-813496	G6pd2	-0.236	2e-07	0.61	0.658	0.616	0.676	0.338	0.41	0.381
chr10	103640935	103641081	1	LINE/L1/L1Md_A	0		0		0	273201	Slc6a15	-0.236	6e-11	0.826	0.818	0.841	0.862	0.689	0.547	0.564
chr17	13930618	13930709	0		0		0		0	-17708	Gm7168	-0.235	2e-23	0.752	0.794	0.867	0.839	0.527	0.569	0.636
chr13	49209317	49209532	1	LINE/L1/Lx2A1	0		1	1110007C09Rik	0	6602	1110007C09Rik	-0.235	3e-11	0.607	0.58	0.56	0.587	0.339	0.331	0.378
chr4	34429615	34429791	0		0		0		0	-120911	Akirin2	-0.235	0.001	0.759	0.805	0.81	0.789	0.541	0.497	0.629
chr9	102649126	102649185	0		0		0		0	22861	Anapc13	-0.235	5e-12	0.88	0.865	0.811	0.858	0.667	0.537	0.655
chr9	78064869	78064990	0		1	Gcm1	0		0	12973	Gcm1	-0.235	5e-08	0.828	0.793	0.818	0.733	0.5	0.601	0.574
chr18	40354669	40354820	1	LINE/L1/L1Md_F2	0		1	Kctd16	0	96384	Kctd16	-0.235	3e-06	0.612	0.635	0.629	0.606	0.421	0.357	0.376
chr10	62172165	62172243	0		0		0		0	22023	Mir7662	-0.235	2e-20	0.792	0.764	0.771	0.784	0.607	0.479	0.539
chr10	67353047	67353238	0		0		0		0	-67861	Nrbf2	-0.235	5e-07	0.897	0.89	0.893	0.877	0.732	0.625	0.608
chr6	137171784	137171869	1	LTR/ERV1/RLTR41	0		0		0	-1330	Rerg	-0.235	0.0007	0.598	0.611	0.562	0.577	0.351	0.406	0.3
chr1	167551561	167551859	0		0		0		0	-46651	Rxrg	-0.235	9e-11	0.354	0.427	0.448	0.43	0.195	0.176	0.169
chr4	43646765	43646810	0		0		1	Npr2	0	6764	Spag8	-0.235	0.0005	0.795	0.768	0.848	0.771	0.702	0.494	0.487
chr5	64236575	64236687	0		0		1	Tbc1d1	0	6275	Tbc1d1	-0.235	2e-13	0.772	0.736	0.723	0.646	0.427	0.507	0.517
chr5	116179717	116179835	0		0		1	Ccdc60	0	-96530	Tmem233	-0.235	2e-07	0.815	0.835	0.855	0.871	0.643	0.584	0.599
chr17	16858038	16858099	1	LINE/L1/L1Md_T	0		0		0	-206034	Zfp960	-0.235	5e-28	0.898	0.896	0.916	0.871	0.678	0.621	0.682
chr4	47318459	47318618	1	LTR/ERVK/RMER13A2	0		0		0	-34766	Tgfbr1	-0.234	2e-08	0.93	0.95	0.925	0.934	0.708	0.608	0.783
chr10	91575776	91575881	0		0		0		0	-404209	Tmpo	-0.234	2e-05	0.828	0.764	0.825	0.821	0.542	0.557	0.632
chr9	42885559	42885601	0		0		1	Grik4	0	58791	Grik4	-0.234	0.0002	0.614	0.66	0.648	0.755	0.347	0.508	0.447
chr14	22051507	22051615	0		0		1	1700112E06Rik	0	31850	1700112E06Rik	-0.234	3e-15	0.73	0.787	0.735	0.772	0.543	0.526	0.493
chr7	79089514	79089665	0		1	Acan	1	Acan	0	36108	Acan	-0.234	1e-12	0.584	0.618	0.585	0.638	0.372	0.389	0.357
chr18	53510451	53510544	0		0		1	Prdm6	0	45953	Prdm6	-0.234	4e-11	0.887	0.872	0.815	0.868	0.685	0.52	0.672
chr3	30702793	30702963	1	LTR/ERVK/RMER13B	0		0		0	-43414	Samd7	-0.234	6e-16	0.586	0.564	0.626	0.618	0.341	0.391	0.359
chr13	57429215	57429465	0		1	Spock1	1	Spock1	0	478992	Spock1	-0.234	6e-25	0.885	0.872	0.892	0.907	0.639	0.677	0.648
chr11	43156083	43156172	0		0		1	Atp10b	0	6252	Atp10b	-0.233	5e-28	0.934	0.931	0.93	0.933	0.738	0.682	0.68
chr13	42818182	42818545	0		0		1	Phactr1	0	-47882	Phactr1	-0.233	5e-21	0.678	0.665	0.676	0.715	0.41	0.455	0.483
chr3	121250222	121250278	0		0		1	Tmem56	0	13066	Tmem56	-0.233	2e-22	0.86	0.88	0.92	0.851	0.623	0.628	0.688
chr14	100385190	100385459	1	LINE/L1/L1Md_T	0		0		0	-235528	Klf12	-0.232	8e-30	0.907	0.916	0.94	0.937	0.649	0.733	0.697
chr1	153819260	153819299	1	LTR/ERVK/RMER13A	0		1	Rgsl1	0	24861	Rgsl1	-0.232	0.002	0.687	0.606	0.687	0.726	0.37	0.48	0.481
chr16	29556411	29556477	0		0		0		0	-11580	Atp13a4	-0.232	1e-25	0.83	0.77	0.772	0.794	0.589	0.521	0.564
chr10	116963208	116963311	1	LTR/ERVL/LTR16D1	1	4933412E12Rik	0		0	-1479	D630029K05Rik	-0.232	4e-06	0.878	0.803	0.858	0.74	0.683	0.527	0.559
chr19	51549922	51549999	1	LINE/L1/L1Md_T	0		0		0	-714362	Ins1	-0.232	1e-35	0.934	0.952	0.956	0.947	0.749	0.666	0.73
chr18	76616383	76616514	0		0		0		0	-239956	Skor2	-0.232	3e-17	0.78	0.784	0.774	0.825	0.486	0.559	0.629
chr9	103029181	103029287	0		0		1	Slco2a1	0	20746	Slco2a1	-0.232	1e-13	0.694	0.755	0.715	0.657	0.459	0.516	0.452
chr8	28594264	28594456	0		0		0		0	-509507	Gm8096	-0.231	0.002	0.688	0.686	0.684	0.676	0.399	0.377	0.584
chr13	59682494	59682569	1	LTR/ERVK/RMER17C-int	0		0		0	-6748	Golm1	-0.231	9e-23	0.477	0.432	0.467	0.406	0.225	0.22	0.198
chr2	163290502	163290591	0		0		1	Tox2	0	65093	Tox2	-0.231	2e-08	0.452	0.471	0.384	0.437	0.25	0.224	0.14
chr10	60317097	60317170	0		1	Cdh23	0		0	-29716	4632428N05Rik	-0.231	5e-31	0.903	0.926	0.911	0.91	0.69	0.675	0.676
chr12	45309323	45309569	0		0		0		0	-234963	Stxbp6	-0.231	6e-21	0.286	0.322	0.28	0.322	0.085	0.046	0.082
chr11	32277591	32277760	0		1	Hba-x	0		0	1077	Hba-x	-0.23	0.002	0.738	0.709	0.618	0.68	0.5	0.513	0.355
chr17	73006167	73006234	0		0		0		0	87896	Lbh	-0.23	2e-17	0.567	0.584	0.574	0.519	0.326	0.358	0.309
chr2	71461587	71461714	1	LTR/ERVK/RMER13A	0		1	Metap1d	0	8313	Metap1d	-0.23	4e-15	0.582	0.535	0.526	0.484	0.262	0.315	0.329
chr12	104614971	104615134	0		0		0		0	136900	Dicer1	-0.23	6e-12	0.892	0.844	0.898	0.854	0.594	0.646	0.688
chr12	43928991	43929202	1	LINE/L1/L1Md_T	0		0		0	280972	Dnajb9	-0.23	1e-21	0.917	0.875	0.887	0.849	0.587	0.744	0.626
chr2	114480088	114480158	1	LINE/L1/L1Md_T	0		0		0	174805	Dph6	-0.23	6e-35	0.917	0.913	0.918	0.899	0.69	0.695	0.657
chr4	54534974	54535028	0		0		0		0	-412943	Zfp462	-0.23	2e-05	0.65	0.765	0.834	0.893	0.591	0.481	0.592
chr15	91752160	91752271	0		1	Lrrk2	0		0	78993	Lrrk2	-0.229	2e-19	0.785	0.814	0.781	0.847	0.577	0.564	0.592
chr11	117600534	117600617	0		0		0		0	-10670	2900041M22Rik	-0.229	5e-19	0.588	0.669	0.67	0.667	0.425	0.43	0.403
chr17	14169600	14169776	0		0		0		0	34143	Dact2	-0.229	2e-19	0.55	0.588	0.595	0.506	0.317	0.331	0.344
chr2	163277410	163277480	0		0		1	Tox2	0	51992	Tox2	-0.229	1e-31	0.841	0.837	0.859	0.86	0.59	0.6	0.671
chr1	37261216	37261538	0		1	Cnga3	0		0	-38460	Inpp4a	-0.228	1e-19	0.931	0.938	0.93	0.917	0.702	0.687	0.717
chr8	112129298	112129407	1	LINE/L1/Lx4A	0		0		0	117994	Terf2ip	-0.228	3e-18	0.792	0.829	0.78	0.824	0.586	0.539	0.608
chr12	106143116	106143156	0		0		0		0	132874	Vrk1	-0.228	7e-19	0.682	0.657	0.654	0.674	0.458	0.418	0.436
chr8	23453625	23453681	0		0		0		0	42152	Sfrp1	-0.228	5e-05	0.879	0.809	0.834	0.828	0.526	0.648	0.649
chr14	13907459	13907645	1	LTR/ERVK/RLTR9E	0		0		0	53761	Thoc7	-0.228	1e-06	0.933	0.92	0.951	0.831	0.583	0.7	0.75
chr19	10798373	10798460	0		1	Cd6	0		0	31642	Cd6	-0.227	9e-19	0.823	0.805	0.822	0.743	0.584	0.552	0.581
chr2	78174026	78174095	1	LINE/L1/Lx8b	0		1	4930440I19Rik	0	-63486	Gm14461	-0.227	2e-10	0.846	0.795	0.808	0.788	0.607	0.584	0.556
chr5	52910301	52910644	0		0		0		0	76338	Anapc4	-0.227	2e-18	0.374	0.44	0.423	0.408	0.173	0.198	0.157
chr10	41992760	41992848	0		0		1	Armc2	0	25578	Armc2	-0.227	2e-09	0.831	0.836	0.851	0.796	0.56	0.648	0.599
chr12	73617907	73617987	0		0		1	Prkch	0	32907	Prkch	-0.227	3e-13	0.49	0.511	0.463	0.515	0.267	0.273	0.262
chr12	82548657	82548800	0		0		0		0	-68309	Rgs6	-0.227	0.0006	0.906	0.828	0.898	0.897	0.619	0.685	0.662
chr18	82926967	82927054	0		0		1	Zfp516	0	-6450	4930592I03Rik	-0.226	4e-14	0.817	0.794	0.816	0.786	0.588	0.492	0.651
chr7	105038322	105038443	1	LTR/ERVK/RLTR10-int	0		0		0	3183	Olfr676	-0.226	4e-11	0.69	0.664	0.619	0.696	0.466	0.393	0.464
chr17	25373913	25374069	0		1	Tpsg1	1	Tpsg1	0	3439	Tpsg1	-0.226	3e-22	0.574	0.509	0.567	0.513	0.31	0.292	0.342
chr17	87471904	87472033	0		0		0		0	-25033	Calm2	-0.226	0.003	0.737	0.764	0.798	0.77	0.593	0.5	0.548
chr10	30946065	30946167	1	LTR/ERVK/BGLII	0		0		0	-103333	Hey2	-0.226	2e-14	0.848	0.862	0.836	0.915	0.58	0.652	0.686
chr10	126377736	126377852	0		0		0		0	411576	Lrig3	-0.226	7e-09	0.72	0.711	0.724	0.782	0.516	0.545	0.463
chr15	38259644	38259747	0		0		0		0	40494	Odf1	-0.226	2e-09	0.595	0.613	0.648	0.638	0.441	0.36	0.388
chr12	56709795	56709923	0		1	Pax9	0		0	14221	Pax9	-0.226	4e-11	0.62	0.597	0.664	0.63	0.405	0.39	0.41
chr1	157052001	157052194	1	LTR/ERVK/RMER13B	0		0		0	56547	Tex35	-0.225	0.001	0.805	0.786	0.766	0.806	0.57	0.529	0.594
chr1	3934416	3934514	1	LTR/ERVK/RLTR17	0		0		0	-262967	Xkr4	-0.225	4e-22	0.938	0.897	0.932	0.9	0.719	0.687	0.666
chr17	47392101	47392401	0		1	Guca1b	0		0	6859	Guca1b	-0.225	5e-13	0.603	0.636	0.669	0.673	0.395	0.377	0.488
chr11	5803108	5803260	0		1	Pgam2	1	Pgam2	0	612	Pgam2	-0.225	3e-09	0.691	0.69	0.609	0.638	0.403	0.462	0.433
chr13	46594882	46595341	1	LINE/L2/L2b	0		1	Cap2	0	-74409	C78339	-0.225	4e-20	0.877	0.895	0.882	0.876	0.609	0.635	0.728
chr19	53404815	53404883	0		0		0		0	-14276	Smndc1	-0.225	3e-19	0.95	0.941	0.958	0.976	0.691	0.762	0.745
chr6	142938644	142938731	0		0		1	St8sia1	0	25764	St8sia1	-0.225	7e-07	0.705	0.7	0.697	0.753	0.455	0.512	0.497
chr7	112985853	112985953	0		0		0		0	31942	Rassf10	-0.225	7e-13	0.682	0.691	0.726	0.656	0.45	0.464	0.475
chr1	136365017	136365070	0		0		0		0	-18940	Camsap2	-0.224	1e-05	0.488	0.634	0.495	0.498	0.287	0.238	0.386
chr13	3626975	3627040	1	LTR/ERVK/RMER17B2	0		0		0	-7023	Asb13	-0.224	2e-10	0.737	0.702	0.755	0.751	0.477	0.5	0.558
chr13	104616053	104616177	0		0		0		0	200838	Cwc27	-0.224	2e-20	0.889	0.869	0.881	0.865	0.598	0.705	0.653
chr9	85244448	85244595	1	LTR/ERVK/RMER17A2	0		0		0	82602	Fam46a	-0.224	1e-09	0.818	0.811	0.85	0.794	0.56	0.644	0.584
chr15	96174669	96174783	1	LTR/ERVK/MLTR31C_MM	0		0		0	-8073	Gm4371	-0.224	2e-13	0.893	0.892	0.9	0.85	0.702	0.646	0.632
chr7	121487211	121487488	0		0		1	Hs3st2	0	95055	Hs3st2	-0.224	0.0003	0.83	0.726	0.763	0.777	0.49	0.562	0.596
chr10	43037574	43037614	0		0		1	Sobp	0	136936	Sobp	-0.224	6e-15	0.613	0.652	0.552	0.625	0.397	0.325	0.436
chr5	109079165	109079294	1	LINE/L1/L1Md_T	0		0		0	18634	Vmn2r12	-0.224	2e-19	0.924	0.878	0.891	0.918	0.633	0.71	0.693
chr10	17024214	17024290	0		0		1	Gm20125	0	71530	Gm20125	-0.223	4e-16	0.666	0.704	0.657	0.7	0.378	0.471	0.524
chr19	53296795	53297077	0		0		0		0	-13569	Mxi1	-0.223	6e-11	0.636	0.654	0.629	0.65	0.367	0.418	0.47
chr8	125591520	125591619	0		0		1	4930567H12Rik	0	6933	4930567H12Rik	-0.223	3e-11	0.876	0.907	0.892	0.944	0.661	0.674	0.71
chr10	48810329	48810400	0		0		0		0	285479	C130030K03Rik	-0.223	1e-12	0.89	0.91	0.887	0.897	0.668	0.653	0.697
chr11	63957621	63957721	0		0		0		0	-35387	Hs3st3b1	-0.223	8e-19	0.657	0.763	0.685	0.681	0.481	0.45	0.484
chr13	76345701	76346283	1	LINE/L1/L1Md_F2	0		0		0	-38968	Mctp1	-0.223	7e-05	0.698	0.737	0.746	0.698	0.515	0.472	0.505
chr18	76137087	76137970	0		1	Zbtb7c	0		0	-33023	Mir6358	-0.223	2e-09	0.868	0.873	0.892	0.881	0.661	0.618	0.686
chr11	108918828	108918989	0		0		0		0	-1440	Axin2	-0.222	2e-13	0.794	0.794	0.82	0.784	0.578	0.563	0.586
chr6	143316118	143316209	0		0		0		0	70277	D6Ertd474e	-0.222	0.0001	0.736	0.814	0.881	0.786	0.505	0.531	0.712
chr11	28382774	28382926	1	LINE/L1/L1Md_F3	0		0		0	201474	Ccdc85a	-0.222	5e-05	0.686	0.597	0.656	0.623	0.4	0.447	0.406
chr6	34229542	34229634	0		0		0		0	-52534	Slc35b4	-0.222	1e-17	0.425	0.465	0.43	0.453	0.258	0.201	0.203
chr10	95175889	95176070	0		1	Cradd	1	Cradd	0	148117	Cradd	-0.222	9e-13	0.566	0.584	0.588	0.612	0.35	0.358	0.388
chr16	96820819	96820990	0		1	Dscam	0		0	349831	Dscam	-0.222	3e-14	0.921	0.898	0.891	0.921	0.692	0.73	0.636
chr1	178553053	178553111	0		0		1	Kif26b	0	23958	Kif26b	-0.222	2e-17	0.752	0.704	0.779	0.754	0.537	0.542	0.495
chr16	31575706	31575953	0		0		0		0	-87612	Dlg1	-0.221	7e-22	0.322	0.439	0.452	0.367	0.182	0.149	0.193
chr5	112425000	112425138	0		0		1	Sez6l	0	-24356	Gm6588	-0.221	0.0003	0.642	0.699	0.643	0.605	0.472	0.373	0.432
chr1	127420358	127420723	0		0		1	Mgat5	0	215555	Mgat5	-0.221	0.0002	0.538	0.579	0.546	0.585	0.348	0.338	0.337
chr12	106584081	106584198	0		0		0		0	132184	4933406K04Rik	-0.221	5e-11	0.861	0.859	0.847	0.879	0.654	0.646	0.619
chr13	45078696	45078798	0		0		0		1	-76651	Dtnbp1	-0.221	3e-28	0.335	0.376	0.396	0.322	0.131	0.165	0.111
chr3	59736898	59736959	0		0		1	Gm5538	0	7143	Gm5538	-0.221	3e-22	0.756	0.736	0.778	0.736	0.557	0.507	0.527
chr12	102389955	102390073	0		1	Rin3	0		0	49683	Lgmn	-0.221	2e-29	0.428	0.468	0.368	0.369	0.178	0.187	0.197
chr2	51871827	51871894	1	LTR/ERVK/RMER17B	0		0		0	62784	Rbm43	-0.221	5e-20	0.808	0.815	0.833	0.826	0.573	0.627	0.598
chr13	58668807	58668886	0		0		0		0	-57969	Slc28a3	-0.221	4e-36	0.458	0.489	0.458	0.506	0.364	0.16	0.249
chr8	104211010	104211091	0		1	Bean1	0		0	37508	Tk2	-0.221	2e-17	0.855	0.893	0.892	0.886	0.634	0.648	0.695
chr18	83285905	83285965	0		0		0		0	39949	4921531P14Rik	-0.22	3e-13	0.726	0.624	0.655	0.686	0.462	0.475	0.422
chr8	60472883	60473236	1	LINE/L1/L1Md_T	0		0		0	-33063	Aadat	-0.22	2e-27	0.811	0.844	0.839	0.818	0.597	0.632	0.611
chr10	30316355	30316443	1	LTR/ERV1/RLTR5_Mm	0		0		0	-115859	Cenpw	-0.22	8e-18	0.833	0.786	0.85	0.798	0.525	0.619	0.647
chr14	104853256	104853373	0		0		1	D130009I18Rik	0	214168	D130009I18Rik	-0.22	1e-17	0.845	0.851	0.849	0.859	0.658	0.585	0.647
chr2	118113033	118113372	0		1	Thbs1	0		0	1281	Thbs1	-0.22	9e-29	0.713	0.713	0.7	0.703	0.482	0.472	0.506
chr14	50370786	50370937	1	LTR/ERVK/RMER13B	0		0		0	12949	Tlr11	-0.22	2e-07	0.796	0.872	0.85	0.887	0.595	0.656	0.64
chr10	115806020	115806274	1	LINE/L2/L2	0		0		0	-11136	Tspan8	-0.22	1e-11	0.854	0.849	0.86	0.882	0.561	0.699	0.663
chr12	11760416	11760497	0		0		0		0	122443	Tubb2a-ps2	-0.22	9e-17	0.972	0.936	0.968	0.928	0.694	0.725	0.774
chr7	105434554	105434710	0		1	Cckbr	1	Cckbr	0	8813	Cckbr	-0.219	3e-26	0.936	0.919	0.911	0.929	0.696	0.722	0.693
chr5	66988020	66988124	0		0		1	Limch1	0	19657	Limch1	-0.219	4e-16	0.742	0.807	0.8	0.786	0.554	0.542	0.598
chr18	76824771	76824913	0		0		0		0	-31562	Skor2	-0.219	5e-12	0.802	0.83	0.799	0.81	0.627	0.592	0.556
chr4	53396676	53396766	0		0		0		0	-43691	Slc44a1	-0.219	5e-15	0.806	0.774	0.812	0.824	0.575	0.568	0.612
chr10	121266856	121267286	0		1	Tbc1d30	0		0	44118	Tbc1d30	-0.219	5e-12	0.53	0.588	0.538	0.528	0.337	0.302	0.341
chr6	32215125	32215285	0		1	Plxna4	1	Plxna4	0	164918	1700012A03Rik	-0.219	8e-23	0.759	0.755	0.809	0.718	0.532	0.542	0.551
chr6	35338072	35338178	0		0		0		0	7280	1700065J11Rik	-0.219	7e-06	0.753	0.713	0.778	0.705	0.519	0.525	0.507
chr7	113066522	113066673	0		0		0		0	75417	4930543E12Rik	-0.219	3e-05	0.716	0.671	0.754	0.628	0.405	0.475	0.543
chr7	6995567	6995724	0		1	Aurkc	1	Aurkc	0	262	Aurkc	-0.219	0.0003	0.833	0.854	0.887	0.751	0.664	0.605	0.567
chr1	109502115	109502271	1	LINE/L1/L1Md_Gf	0		0		0	-481543	Cdh7	-0.219	7e-32	0.885	0.89	0.91	0.904	0.647	0.69	0.698
chr12	90364977	90365133	1	LINE/L1/L1Md_F2	0		0		0	373383	Dio2	-0.219	4e-30	0.834	0.829	0.822	0.835	0.606	0.59	0.636
chr5	106816074	106816175	0		0		0		0	109766	Hfm1	-0.219	2e-29	0.522	0.548	0.591	0.659	0.355	0.229	0.498
chr12	11208523	11208693	0		1	Msgn1	0		0	340	Msgn1	-0.219	3e-05	0.841	0.857	0.826	0.895	0.583	0.665	0.654
chr2	82847950	82848090	0		0		0		0	794363	Zfp804a	-0.219	2e-07	0.837	0.79	0.844	0.847	0.642	0.622	0.57
chr5	67463929	67464082	0		1	C330024D21Rik	1	C330024D21Rik	0	109	C330024D21Rik	-0.218	4e-08	0.954	0.887	0.927	0.91	0.781	0.655	0.668
chr11	66911978	66912097	0		1	Pirt	1	Gm12298	0	48	Pirt	-0.218	1e-10	0.378	0.445	0.509	0.535	0.261	0.25	0.237
chr9	60545431	60545839	0		1	9230112J17Rik	1	9230112J17Rik	0	247	9230112J17Rik	-0.218	0.0005	0.764	0.779	0.776	0.701	0.559	0.503	0.549
chr10	95254010	95254120	0		0		1	Cradd	0	70032	Cradd	-0.218	6e-24	0.816	0.835	0.813	0.881	0.586	0.64	0.63
chr6	88234114	88234298	0		0		0		0	11939	Dnajb8	-0.218	3e-14	0.548	0.605	0.543	0.64	0.389	0.348	0.359
chrX	155063163	155063247	0		0		0		0	-1652	Magea5	-0.218	9e-22	0.894	0.88	0.924	0.867	0.757	0.681	0.582
chr6	112727390	112727469	0		1	Srgap3	0		1	-30760	Rad18	-0.218	6e-14	0.715	0.734	0.79	0.69	0.478	0.55	0.518
chr3	34005231	34005321	0		0		0		0	-14802	Fxr1	-0.217	5e-29	0.915	0.91	0.919	0.903	0.652	0.692	0.744
chr14	57313992	57314413	0		0		1	Cryl1	0	84281	Cryl1	-0.217	5e-07	0.686	0.705	0.704	0.769	0.503	0.469	0.488
chr5	4943596	4943939	1	LINE/L1/L1Md_T	0		1	Cdk14	0	-185552	Fzd1	-0.217	2e-11	0.886	0.886	0.919	0.878	0.659	0.698	0.669
chr4	132567485	132567654	0		0		1	Ptafr	0	3504	Ptafr	-0.217	0.001	0.758	0.767	0.792	0.67	0.568	0.532	0.487
chr10	116192438	116192554	0		0		1	Ptprr	0	15146	Ptprr	-0.217	3e-18	0.826	0.855	0.869	0.808	0.598	0.659	0.612
chr3	115442855	115442990	1	LINE/L1/L1Md_T	0		0		0	272133	S1pr1	-0.217	2e-13	0.898	0.883	0.872	0.894	0.588	0.694	0.726
chr4	126721968	126722057	0		1	Tfap2e	0		0	14257	Tfap2e	-0.217	5e-23	0.71	0.691	0.712	0.67	0.471	0.475	0.491
chr9	54922963	54923105	1	LINE/L1/L1Md_T	0		1	Hykk	0	5745	Hykk	-0.216	2e-32	0.812	0.837	0.763	0.836	0.597	0.602	0.592
chr2	142902644	142902731	0		0		0		0	-1224	Kif16b	-0.216	7e-21	0.387	0.293	0.307	0.376	0.134	0.081	0.16
chr14	45552167	45552394	0		0		1	4930527F14Rik	0	8571	4930527F14Rik	-0.216	0.001	0.778	0.923	0.826	0.851	0.581	0.636	0.667
chr6	21026911	21027281	1	LINE/L1/L1Md_Gf	0		0		0	-189012	Kcnd2	-0.216	3e-10	0.735	0.71	0.739	0.699	0.541	0.595	0.413
chr17	29172217	29172311	0		0		1	Cpne5	0	37209	Rab44	-0.216	7e-08	0.416	0.458	0.402	0.398	0.2	0.213	0.193
chr2	124719164	124719264	0		0		0		0	65634	Sema6d	-0.216	1e-15	0.728	0.792	0.748	0.817	0.499	0.573	0.595
chr14	28451866	28451984	0		0		1	Erc2	0	-53547	Wnt5a	-0.216	3e-09	0.563	0.516	0.594	0.576	0.335	0.31	0.398
chr10	17878110	17878313	1	LTR/ERVK/RMER13B	0		0		0	69855	Heca	-0.215	2e-06	0.548	0.53	0.544	0.534	0.279	0.376	0.316
chr16	87739082	87739264	0		0		0		0	40220	Bach1	-0.215	1e-07	0.907	0.807	0.881	0.886	0.668	0.644	0.649
chr1	153721070	153721144	1	LTR/ERVK/MLTR31FA_MM	0		0		0	16722	C230024C17Rik	-0.215	2e-20	0.838	0.899	0.897	0.882	0.653	0.677	0.664
chr5	119640616	119640725	0		0		0		0	14729	Gm16063	-0.215	5e-12	0.823	0.833	0.893	0.856	0.618	0.715	0.57
chr10	11063437	11063572	1	LTR/ERVK/RLTR20B2	0		1	Grm1	0	18827	Grm1	-0.215	0.004	0.8	0.841	0.901	0.81	0.654	0.673	0.543
chr12	31237548	31237744	0		0		0		0	-27647	Lamb1	-0.215	0.001	0.895	0.899	0.878	0.892	0.626	0.777	0.625
chr15	10740153	10740278	0		0		1	4930556M19Rik	0	25317	4930556M19Rik	-0.214	2e-18	0.934	0.914	0.93	0.849	0.68	0.623	0.778
chr13	24906012	24906095	0		0		1	4932702P03Rik	0	455	4932702P03Rik	-0.214	1e-18	0.83	0.789	0.793	0.755	0.597	0.604	0.535
chr13	25583205	25583370	0		0		0		0	-313292	Nrsn1	-0.214	3e-06	0.954	0.923	0.926	0.886	0.688	0.761	0.679
chr2	129774482	129774541	1	LTR/ERVK/RLTR10-int	0		0		0	-26004	Stk35	-0.214	6e-06	0.856	0.762	0.761	0.865	0.653	0.632	0.512
chr11	49958520	49958644	0		1	Rasgef1c	1	Rasgef1c	0	56748	Rasgef1c	-0.214	2e-25	0.81	0.844	0.839	0.818	0.594	0.593	0.656
chr15	97085139	97085220	1	LTR/ERVK/RMER17B	0		0		0	-29224	Slc38a4	-0.214	7e-16	0.861	0.83	0.868	0.836	0.668	0.598	0.639
chr8	118635565	118636072	0		0		1	Cdh13	0	352064	Cdh13	-0.213	6e-08	0.808	0.768	0.762	0.785	0.584	0.581	0.539
chr14	44847124	44847235	0		0		0		0	12195	Ptgdr	-0.213	2e-07	0.806	0.817	0.813	0.775	0.623	0.599	0.549
chr2	84086886	84087318	1	LINE/L1/L1Md_T	0		0		0	-145876	Zswim2	-0.213	2e-27	0.815	0.787	0.778	0.791	0.536	0.586	0.616
chr8	31012114	31012187	0		0		0		0	-77511	Dusp26	-0.213	0.001	0.828	0.776	0.867	0.845	0.641	0.637	0.57
chr8	86147459	86147751	0		0		0		0	306604	Phkb	-0.213	2e-08	0.718	0.75	0.752	0.75	0.509	0.574	0.507
chr1	167581206	167581287	0		0		0		0	-17115	Rxrg	-0.213	2e-12	0.635	0.626	0.594	0.607	0.375	0.398	0.434
chr6	35303510	35303625	0		0		1	Slc13a4	0	4558	Slc13a4	-0.213	2e-26	0.849	0.901	0.909	0.915	0.696	0.671	0.679
chr14	54162095	54162156	0		0		0		0	91803	Dad1	-0.212	1e-23	0.804	0.809	0.786	0.835	0.636	0.52	0.631
chr9	82495261	82495411	1	LINE/L1/L1Md_F3	0		0		0	-334469	Irak1bp1	-0.212	0.0008	0.802	0.733	0.775	0.792	0.578	0.606	0.504
chr19	30260726	30260845	1	Other/Other/RMER1B	0		0		0	27830	Mbl2	-0.212	9e-07	0.895	0.922	0.906	0.912	0.65	0.754	0.686
chr4	87666921	87666998	0		0		0		0	139363	Mllt3	-0.212	2e-16	0.794	0.743	0.769	0.812	0.543	0.559	0.598
chr6	60891647	60892179	1	LTR/ERV1/MMVL30-int	0		0		0	-52403	Mmrn1	-0.212	2e-18	0.9	0.924	0.94	0.932	0.666	0.699	0.773
chr2	181718817	181718904	0		1	Oprl1	0		0	3513	Oprl1	-0.212	2e-14	0.817	0.809	0.784	0.789	0.596	0.574	0.596
chr4	9081810	9082122	0		0		0		0	-187350	Clvs1	-0.212	8e-12	0.346	0.274	0.29	0.338	0.099	0.083	0.117
chr19	20744043	20744109	0		0		0		0	-16520	Aldh1a7	-0.212	4e-30	0.88	0.9	0.916	0.895	0.685	0.658	0.714
chr7	19372996	19373260	0		1	Ppp1r13l	0		0	-8910	Ercc2	-0.212	8e-14	0.717	0.716	0.7	0.637	0.436	0.468	0.539
chr17	29374888	29374972	0		1	Fgd2	0		0	14017	Fgd2	-0.212	4e-13	0.9	0.89	0.905	0.906	0.693	0.719	0.675
chr3	52383546	52383633	0		0		0		0	115254	Foxo1	-0.212	0.0007	0.686	0.805	0.809	0.675	0.573	0.501	0.522
chr4	83186682	83186767	0		0		0		0	-134557	Frem1	-0.211	5e-15	0.491	0.485	0.441	0.456	0.23	0.291	0.251
chr14	27318973	27319066	0		0		1	Arhgef3	0	-17016	Arhgef3	-0.211	2e-13	0.778	0.734	0.758	0.774	0.525	0.552	0.573
chr7	29090023	29090391	0		1	Ryr1	1	Ryr1	0	-6513	Mir1963	-0.211	5e-21	0.722	0.647	0.689	0.696	0.474	0.465	0.493
chr9	43699036	43699110	0		0		0		0	-45502	Pvrl1	-0.211	0.0005	0.932	0.859	0.861	0.892	0.639	0.7	0.685
chr8	26450652	26450756	0		0		0		0	292536	Thap1	-0.211	3e-09	0.792	0.784	0.759	0.725	0.556	0.54	0.562
chr11	114186079	114186158	0		0		0		0	-12139	1700092K14Rik	-0.21	5e-20	0.778	0.804	0.753	0.787	0.602	0.542	0.564
chr13	71879863	71880032	1	LINE/L1/L1Md_T	0		0		0	83775	Irx1	-0.21	9e-36	0.923	0.917	0.944	0.912	0.722	0.737	0.683
chr16	46039735	46039862	1	LTR/ERVK/RMER17A2	0		1	Cd96	0	-29385	Plcxd2	-0.21	5e-11	0.91	0.894	0.897	0.905	0.662	0.666	0.746
chr2	69162740	69162886	0		0		1	Nostrin	0	27014	Nostrin	-0.21	5e-08	0.591	0.715	0.61	0.603	0.362	0.409	0.488
chr6	142788830	142788911	0		0		1	Gm766	0	15596	Gm766	-0.21	1e-18	0.411	0.444	0.464	0.429	0.351	0.163	0.167
chr17	11962042	11962127	0		0		1	Park2	0	-78895	D17Ertd648e	-0.21	4e-12	0.743	0.764	0.758	0.76	0.485	0.532	0.622
chr18	3900173	3900289	0		0		0		0	-265600	Lyzl1	-0.21	8e-13	0.863	0.837	0.872	0.839	0.626	0.653	0.649
chr15	38244154	38244266	0		0		0		0	25008	Odf1	-0.21	9e-15	0.883	0.912	0.9	0.851	0.692	0.621	0.716
chr3	31090057	31090154	0		0		0		0	-4951	Skil	-0.21	2e-12	0.744	0.787	0.759	0.728	0.494	0.638	0.501
chr12	57564376	57564519	0		0		1	4921506M07Rik	0	334	4921506M07Rik	-0.209	1e-11	0.776	0.829	0.829	0.807	0.532	0.653	0.621
chr5	17751418	17751620	1	LTR/ERVK/RMER13B	0		0		0	84377	Cd36	-0.209	4e-06	0.939	0.911	0.917	0.947	0.647	0.813	0.699
chr4	73750469	73750852	1	LINE/L1/L1Md_T	0		1	Rasef	0	39942	Rasef	-0.209	7e-06	0.93	0.922	0.921	0.895	0.718	0.711	0.694
chr10	34258536	34258601	1	LTR/ERV1/MuRRS-int	0		0		0	-23621	Tspyl1	-0.209	2e-19	0.815	0.837	0.73	0.75	0.583	0.555	0.587
chr17	9726193	9726277	0		0		0		0	49631	4930452A19Rik	-0.209	2e-15	0.356	0.455	0.346	0.467	0.153	0.232	0.204
chr4	124533734	124533972	0		0		0		0	-35325	4933407E24Rik	-0.209	2e-25	0.621	0.629	0.629	0.685	0.401	0.387	0.507
chr5	30013370	30013447	0		1	Il6	0		0	248	Il6	-0.209	6e-16	0.53	0.562	0.577	0.531	0.332	0.328	0.363
chr15	101350995	101351092	0		1	Krt80	0		0	-18307	Mir1941	-0.209	8e-08	0.584	0.655	0.686	0.546	0.443	0.385	0.398
chr10	116288317	116288493	0		0		0		0	-12968	Ptprb	-0.209	8e-16	0.479	0.449	0.467	0.459	0.26	0.241	0.263
chr15	97055203	97055320	0		0		1	Slc38a4	0	694	Slc38a4	-0.209	6e-12	0.445	0.449	0.465	0.45	0.383	0.258	0.088
chr14	99366331	99366467	0		0		0		0	67709	Klf5	-0.209	0.002	0.658	0.659	0.797	0.755	0.463	0.568	0.494
chr2	38397494	38397589	0		0		0		0	46235	Lhx2	-0.209	2e-15	0.815	0.815	0.864	0.805	0.592	0.659	0.596
chr10	118126078	118126431	0		0		0		0	-15532	Mdm1	-0.209	2e-07	0.887	0.9	0.88	0.904	0.669	0.717	0.715
chr5	98997195	98997275	0		0		1	Prkg2	0	39844	Prkg2	-0.209	0.0005	0.536	0.597	0.596	0.641	0.426	0.419	0.308
chr15	97404635	97404703	0		0		0		0	-157382	Amigo2	-0.208	2e-22	0.809	0.8	0.806	0.782	0.585	0.591	0.599
chr8	112589055	112589314	0		0		1	Cntnap4	0	19142	Cntnap4	-0.208	1e-09	0.695	0.662	0.673	0.682	0.521	0.433	0.457
chr5	52372822	52372926	0		0		0		0	9071	Sod3	-0.208	0.0002	0.545	0.662	0.625	0.643	0.382	0.45	0.403
chr3	33610514	33610719	1	LTR/ERVK/RMER17B	0		0		0	-189566	Ttc14	-0.208	4e-18	0.463	0.453	0.442	0.435	0.246	0.254	0.221
chr5	92101801	92101923	1	LTR/ERV1/RMER5	0		0		0	-18118	G3bp2	-0.208	7e-09	0.898	0.905	0.902	0.824	0.676	0.621	0.723
chr5	150883238	150883319	0		0		0		0	-69328	Kl	-0.208	1e-15	0.553	0.639	0.574	0.639	0.373	0.435	0.369
chr18	73541882	73541950	0		0		0		0	-30788	Mex3c	-0.208	2e-12	0.752	0.816	0.884	0.852	0.543	0.638	0.673
chr10	32045941	32045989	1	LINE/L1/L1Md_T	0		1	Nkain2	0	-436240	Rnf217	-0.208	2e-24	0.821	0.874	0.861	0.874	0.69	0.64	0.62
chr10	58780699	58780776	1	LINE/L1/L1Md_F2	0		0		0	-32620	Sh3rf3	-0.208	3e-36	0.94	0.945	0.95	0.922	0.744	0.706	0.744
chr7	66292853	66292961	0		0		1	Lrrk1	0	88817	Mir7057	-0.207	3e-08	0.696	0.598	0.598	0.601	0.418	0.378	0.454
chr3	83033035	83033084	0		1	Fga	0		0	6908	Fga	-0.207	5e-07	0.308	0.409	0.315	0.443	0.168	0.155	0.164
chr2	114011671	114011894	0		1	Gjd2	0		0	-1782	A530058N18Rik	-0.207	1e-15	0.745	0.76	0.773	0.729	0.541	0.509	0.582
chr17	32649646	32649756	0		0		0		0	-9781	Cyp4f40	-0.207	3e-07	0.859	0.865	0.872	0.829	0.609	0.677	0.662
chr1	77732092	77732190	0		0		0		0	-217053	Epha4	-0.207	2e-05	0.895	0.87	0.824	0.846	0.652	0.656	0.65
chr1	172575580	172575716	1	LTR/ERVK/RMER13B	0		0		0	14920	Slamf8	-0.207	2e-17	0.905	0.854	0.884	0.873	0.673	0.653	0.687
chr10	97693602	97694210	0		1	Ccer1	1	Gm10754	0	848	Ccer1	-0.206	9e-15	0.892	0.893	0.902	0.924	0.758	0.685	0.652
chr10	33491904	33491977	1	LINE/L1/L1Md_Gf	0		0		0	132660	Clvs2	-0.206	7e-15	0.923	0.928	0.943	0.936	0.701	0.721	0.755
chr8	104590990	104591141	0		0		1	Mir297-2	0	-401	Pdp2	-0.206	1e-08	0.382	0.424	0.353	0.356	0.137	0.166	0.211
chr4	135698801	135698947	0		1	Ifnlr1	0		0	12418	Ifnlr1	-0.206	7e-14	0.83	0.761	0.858	0.805	0.727	0.462	0.638
chr11	94527688	94527859	0		0		0		0	-6272	Mycbpap	-0.206	3e-06	0.835	0.834	0.81	0.826	0.656	0.529	0.674
chr11	87570847	87570970	0		0		0		0	-7480	Sept4	-0.206	1e-16	0.741	0.654	0.696	0.7	0.438	0.512	0.523
chr19	47794989	47795062	0		0		1	Cfap43	0	42335	Cfap43	-0.205	3e-18	0.754	0.787	0.773	0.797	0.563	0.538	0.618
chr19	15308387	15308543	1	LINE/L1/L1Md_A	0		0		0	616157	Psat1	-0.205	5e-35	0.922	0.91	0.921	0.923	0.708	0.715	0.735
chr1	190669337	190669502	0		0		0		0	242350	Rps6kc1	-0.205	8e-06	0.857	0.928	0.94	0.944	0.638	0.723	0.774
chr4	13889645	13889835	0		1	Runx1t1	0		0	104959	Runx1t1	-0.205	0.002	0.826	0.813	0.786	0.826	0.622	0.581	0.615
chr7	36087923	36088015	0		0		0		0	-284980	Zfp507	-0.205	9e-21	0.921	0.892	0.935	0.903	0.659	0.746	0.717
chr4	144807461	144807528	0		0		0		0	-20911	Gm438	-0.205	0.0007	0.534	0.48	0.563	0.559	0.412	0.316	0.265
chr10	115175609	115175674	0		0		1	Tph2	0	9380	Tph2	-0.205	9e-11	0.547	0.581	0.51	0.521	0.288	0.292	0.418
chr14	77582438	77582573	0		1	Enox1	0		0	-75638	Gm6994	-0.205	1e-22	0.674	0.732	0.728	0.672	0.52	0.446	0.529
chr2	174670836	174670978	0		0		1	Zfp831	0	27374	Zfp831	-0.205	0.0002	0.77	0.795	0.778	0.668	0.574	0.458	0.61
chr6	112459493	112459644	0		1	Cav3	0		0	64	Cav3	-0.204	1e-09	0.846	0.723	0.854	0.77	0.534	0.596	0.651
chr4	135690529	135690597	0		1	Ifnlr1	0		0	4107	Ifnlr1	-0.204	5e-05	0.815	0.831	0.779	0.802	0.637	0.544	0.629
chr10	115693472	115693784	0		0		0		0	-105848	Lgr5	-0.204	8e-07	0.879	0.906	0.889	0.926	0.719	0.71	0.72
chr3	101796706	101796822	0		0		0		0	39459	Mab21l3	-0.204	8e-05	0.736	0.722	0.701	0.587	0.527	0.497	0.428
chr19	58004562	58004572	0		0		1	Atrnl1	0	-46599	Mir5623	-0.204	0.004	0.917	0.912	0.879	0.914	0.578	0.792	0.76
chr2	112053637	112053938	1	LINE/L1/L1Md_T	0		0		0	-10758	Olfr1312	-0.204	4e-30	0.909	0.907	0.906	0.896	0.676	0.692	0.732
chr6	127250009	127250137	0		0		0		0	57894	D130058E03	-0.204	0.006	0.392	0.524	0.399	0.554	0.264	0.319	0.205
chr4	150157750	150157835	0		0		1	Slc2a7	0	8821	Slc2a7	-0.204	1e-16	0.625	0.662	0.58	0.666	0.402	0.389	0.497
chr5	101082838	101082939	0		0		0		0	236660	Agpat9	-0.204	6e-09	0.871	0.837	0.842	0.837	0.598	0.614	0.697
chr1	80239993	80240121	0		0		0		0	-26113	Fam124b	-0.204	4e-11	0.648	0.629	0.507	0.578	0.316	0.373	0.47
chr17	27091119	27091280	0		1	Mir7677	1	Itpr3	0	-44	Mir7677	-0.204	2e-07	0.98	0.928	0.94	0.928	0.75	0.75	0.719
chr2	6060247	6060339	0		0		0		0	69892	Proser2	-0.203	2e-05	0.796	0.859	0.797	0.793	0.571	0.675	0.578
chr4	125717122	125717260	0		0		0		0	205119	2610028E06Rik	-0.203	9e-06	0.618	0.617	0.687	0.653	0.503	0.38	0.44
chr6	140289965	140290208	0		0		0		0	-134012	Plekha5	-0.203	1e-11	0.797	0.849	0.822	0.798	0.596	0.583	0.663
chr1	135364703	135364876	0		1	Lmod1	0		0	10273	Shisa4	-0.203	3e-16	0.82	0.828	0.815	0.804	0.581	0.64	0.62
chr17	47138124	47138169	0		0		0		0	-2795	Trerf1	-0.203	9e-13	0.737	0.719	0.674	0.714	0.475	0.47	0.575
chr2	163824310	163824432	0		0		1	Wisp2	0	3538	Wisp2	-0.203	7e-12	0.696	0.764	0.763	0.776	0.528	0.54	0.574
chr3	123113236	123113803	0		1	Synpo2	0		0	-78533	Myoz2	-0.202	1e-15	0.893	0.912	0.934	0.884	0.673	0.711	0.742
chr1	59508784	59508852	0		0		0		0	-7445	Gm973	-0.202	2e-15	0.324	0.368	0.277	0.351	0.14	0.13	0.114
chr13	78212059	78212217	0		0		1	A830082K12Rik	0	-13156	Nr2f1	-0.202	0.005	0.298	0.27	0.312	0.2	0.085	0.04	0.124
chr7	51262956	51263032	0		0		0		0	-248034	Ano5	-0.202	0.0001	0.984	0.968	0.966	0.953	0.726	0.769	0.803
chr10	94253272	94253619	0		0		0		0	45257	Gm4792	-0.202	1e-11	0.777	0.841	0.831	0.83	0.64	0.562	0.65
chr5	65036818	65036974	0		0		1	Fam114a1	0	66579	Mir574	-0.202	3e-12	0.879	0.889	0.852	0.85	0.71	0.589	0.696
chr1	171185580	171185672	0		0		1	Pcp4l1	0	10642	Pcp4l1	-0.202	4e-11	0.572	0.578	0.546	0.574	0.375	0.33	0.394
chr14	87809779	87809838	1	LTR/ERVK/RLTR10-int	0		0		0	393226	Tdrd3	-0.202	1e-13	0.905	0.919	0.851	0.879	0.719	0.647	0.699
chr8	36394560	36394678	0		0		0		0	-94571	6430573F11Rik	-0.201	2e-16	0.767	0.82	0.826	0.763	0.592	0.592	0.596
chr13	105793290	105793366	1	LINE/L1/L1Md_T	0		0		0	349636	Htr1a	-0.201	4e-23	0.788	0.811	0.768	0.752	0.609	0.56	0.567
chr8	113966363	113966462	0		0		0		0	-117573	Adamts18	-0.201	2e-06	0.542	0.495	0.555	0.531	0.31	0.239	0.441
chr1	161314319	161314419	1	LTR/ERV1/RLTR1B-int	0		0		0	-63203	Prdx6	-0.201	1e-15	0.53	0.488	0.504	0.431	0.275	0.261	0.325
chr17	29769718	29769947	0		0		0		0	-52815	Ccdc167	-0.201	0.0003	0.881	0.845	0.902	0.893	0.639	0.634	0.771
chr11	104581642	104581675	0		0		1	Myl4	0	-26341	Itgb3	-0.201	0.008	0.889	0.926	0.854	0.8	0.597	0.788	0.611
chr18	69205472	69205605	1	LTR/ERVK/RMER17D2	0		0		0	-138953	Tcf4	-0.201	0.007	0.746	0.775	0.76	0.717	0.512	0.655	0.477
chr17	31096837	31096901	0		0		1	Abcg1	0	32742	Tff3	-0.201	3e-07	0.959	0.944	0.96	0.946	0.75	0.75	0.75
chr5	117748676	117748833	0		1	Ksr2	1	Ksr2	0	-118364	Nos1	-0.2	4e-18	0.891	0.905	0.899	0.882	0.707	0.713	0.662
chr12	69120083	69120169	1	LTR/ERVK/RLTR17	0		0		0	39060	Rps29	-0.2	5e-24	0.905	0.917	0.911	0.917	0.692	0.694	0.753
chr17	9978852	9979065	0		0		0		0	-203092	4930452A19Rik	-0.2	4e-14	0.712	0.77	0.791	0.777	0.541	0.551	0.594
chr8	89986841	89986892	1	LTR/ERVK/RMER17A2	0		0		0	361386	Tox3	-0.2	9e-06	0.698	0.748	0.765	0.739	0.596	0.524	0.5
chr7	25422651	25423004	0		0		1	4732471J01Rik	1	-9942	Cxcl17	0.2	5e-06	0.363	0.339	0.376	0.397	0.593	0.556	0.555
chr13	3478828	3478959	0		0		1	2810429I04Rik	0	592	2810429I04Rik	0.2	7e-08	0.152	0.177	0.221	0.124	0.376	0.394	0.334
chr11	115227725	115227901	0		0		1	Tmem104	0	39430	Grin2c	0.2	7e-09	0.212	0.142	0.153	0.149	0.395	0.274	0.422
chr14	24930353	24930486	0		0		0		0	212821	4930572O13Rik	0.2	7e-08	0.351	0.23	0.303	0.378	0.387	0.605	0.56
chr5	35908230	35908364	0		0		1	Afap1	0	14979	Afap1	0.2	1e-11	0.364	0.317	0.342	0.403	0.397	0.603	0.671
chr8	18740300	18740432	0		0		1	Mcph1--Angpt2	0	1196	Angpt2	0.201	9e-14	0.373	0.355	0.377	0.508	0.538	0.64	0.636
chr4	136783748	136783954	0		0		1	Ephb2	0	52160	Ephb2	0.201	1e-16	0.307	0.256	0.325	0.369	0.485	0.552	0.509
chr11	96863353	96863541	0		0		0		0	13055	Mir152	0.201	4e-16	0.282	0.345	0.26	0.319	0.426	0.508	0.572
chr10	77664288	77664568	0		0		0		1	-22140	Tspear	0.201	2e-25	0.329	0.29	0.327	0.276	0.502	0.495	0.526
chr4	152128150	152128337	0		1	Espn	0		0	681	Espn	0.202	4e-22	0.664	0.596	0.602	0.804	0.873	0.879	0.857
chr11	96767984	96768052	0		1	Snx11	0		0	9537	Snx11	0.202	4e-17	0.534	0.57	0.607	0.5	0.734	0.772	0.758
chr13	65726395	65726837	0		0		0		1	-386836	Gm10324	0.202	6e-22	0.068	0.07	0.08	0.082	0.284	0.297	0.251
chr2	157383199	157383433	0		0		1	Manbal	0	15723	Manbal	0.202	4e-09	0.449	0.374	0.339	0.475	0.554	0.65	0.628
chr4	134954561	134954723	0		0		0		0	23663	Syf2	0.202	8e-05	0.4	0.288	0.319	0.22	0.485	0.564	0.475
chr9	120127113	120127174	0		0		0		0	-621	Rpsa	0.203	8e-10	0.48	0.515	0.532	0.52	0.735	0.763	0.647
chr3	146405382	146405536	0		0		1	Ssx2ip	0	818	Ssx2ip	0.203	1e-07	0.586	0.545	0.548	0.432	0.729	0.712	0.756
chr2	33216751	33216805	0		0		1	Angptl2--Ralgps1	0	818	Angptl2	0.203	4e-18	0.207	0.195	0.196	0.201	0.429	0.409	0.372
chr7	80382816	80382880	0		1	Fes	0		0	5098	Fes	0.203	2e-13	0.332	0.33	0.347	0.365	0.48	0.601	0.556
chr4	43558989	43559055	0		0		1	Tln1	0	3561	Tln1	0.203	9e-05	0.129	0.169	0.16	0.068	0.27	0.39	0.349
chr10	127540027	127540169	0		1	Lrp1	1	Lrp1	0	-5539	Nxph4	0.203	4e-11	0.574	0.634	0.614	0.597	0.811	0.808	0.806
chr6	119520776	119520893	1	LTR/ERVK/RLTR34C_MM	0		1	Wnt5b	0	23513	Wnt5b	0.203	7e-15	0.331	0.332	0.333	0.429	0.49	0.617	0.573
chr5	111958301	111958460	0		0		0		0	-196652	E130006D01Rik	0.204	2e-14	0.463	0.553	0.538	0.599	0.755	0.731	0.743
chr8	119632798	119633477	0		1	Kcng4	1	Kcng4	1	2542	Kcng4	0.204	1e-11	0.514	0.504	0.518	0.517	0.719	0.719	0.724
chr4	107828983	107829142	0		0		1	Lrp8	0	26804	Lrp8	0.204	5e-07	0.234	0.19	0.325	0.358	0.41	0.566	0.465
chr15	76205868	76206489	0		1	Plec	1	Plec	0	143	Plec	0.204	2e-15	0.512	0.475	0.48	0.527	0.669	0.721	0.717
chr7	27663397	27663458	0		1	Map3k10	0		0	9505	Ttc9b	0.204	0.001	0.567	0.518	0.54	0.554	0.745	0.773	0.729
chr10	79990363	79990501	0		0		1	Cnn2--Bc1	0	1833	Cnn2	0.204	1e-10	0.435	0.413	0.391	0.479	0.665	0.616	0.617
chr7	137253355	137253578	0		0		1	Ebf3	0	18784	Gm10578	0.204	3e-16	0.267	0.277	0.225	0.278	0.415	0.492	0.488
chr8	120232957	120233240	0		0		0		0	-4868	A330074K22Rik	0.205	3e-19	0.52	0.484	0.559	0.548	0.701	0.739	0.76
chr10	81587721	81588063	0		1	Tle2	1	Tle2	1	12606	Tle2	0.205	2e-25	0.546	0.543	0.551	0.516	0.753	0.737	0.743
chr12	22744936	22746003	0		0		0		1	264773	2410018L13Rik	0.205	9e-12	0.069	0.083	0.103	0.108	0.291	0.311	0.275
chr17	29798277	29798476	0		0		0		0	-81359	Ccdc167	0.205	9e-05	0.163	0.284	0.233	0.206	0.406	0.472	0.401
chr4	43421771	43421917	0		1	Rusc2	0		0	7290	Fam166b	0.205	0.007	0.561	0.482	0.415	0.4	0.658	0.694	0.653
chr7	6189610	6189888	0		1	Zfp444	0		1	-7340	Galp	0.205	1e-08	0.265	0.452	0.324	0.305	0.546	0.578	0.499
chr4	114767113	114767326	0		0		0		0	-54499	Gm12830	0.205	3e-22	0.387	0.379	0.393	0.493	0.558	0.625	0.671
chr8	69920413	69920543	0		0		1	Gatad2a	0	-17920	Ndufa13	0.205	4e-07	0.412	0.424	0.415	0.488	0.665	0.616	0.643
chr4	126150461	126151044	0		1	Sh3d21	1	Sh3d21	0	2750	Eva1b	0.205	2e-19	0.566	0.552	0.6	0.621	0.748	0.809	0.811
chr15	40167822	40168249	0		0		0		0	33672	9330182O14Rik	0.206	4e-13	0.667	0.629	0.659	0.718	0.894	0.887	0.86
chr8	120564053	120564163	0		0		1	Gse1	0	24967	Gins2	0.206	2e-15	0.492	0.516	0.489	0.569	0.676	0.727	0.77
chr11	113950829	113950870	0		0		1	Sdk2	0	115101	Sdk2	0.206	6e-06	0.423	0.445	0.433	0.52	0.692	0.657	0.635
chr12	22156172	22156900	0		0		0		1	-739100	Ywhaq	0.206	1e-20	0.047	0.043	0.085	0.063	0.251	0.285	0.262
chr12	19489950	19490191	0		0		0		1	975561	5730507C01Rik	0.207	5e-12	0.277	0.277	0.278	0.262	0.501	0.5	0.443
chr2	33601400	33601522	0		0		1	Lmx1b	0	39050	Lmx1b	0.207	2e-09	0.489	0.559	0.547	0.529	0.704	0.82	0.686
chr14	51487964	51488168	1	LINE/L1/L1Md_T	0		0		0	36105	Vmn2r89	0.207	3e-20	0.587	0.535	0.529	0.52	0.755	0.723	0.771
chr7	19118045	19118476	0		0		0		1	-1598	Fbxo46	0.207	0.0008	0.221	0.192	0.191	0.219	0.413	0.394	0.421
chr8	83668524	83668655	0		1	Ptger1	0		1	1951	Ptger1	0.207	1e-31	0.099	0.139	0.041	0.072	0.24	0.334	0.31
chr2	166080655	166080751	0		0		1	Sulf2	0	74582	Sulf2	0.207	1e-15	0.249	0.207	0.244	0.235	0.441	0.499	0.383
chr4	153479228	153479347	0		0		1	Ajap1	0	3542	Ajap1	0.207	1e-08	0.204	0.215	0.309	0.254	0.435	0.449	0.472
chr7	29212631	29213063	0		0		1	Catsperg1	0	1186	Catsperg1	0.207	6e-23	0.12	0.127	0.117	0.111	0.387	0.226	0.364
chr11	113368088	113368221	0		0		1	Slc39a11	0	-158485	4732490B19Rik	0.208	1e-12	0.557	0.509	0.531	0.616	0.697	0.779	0.809
chr16	52178797	52178913	0		0		1	Cblb	0	147307	Cblb	0.208	2e-07	0.532	0.473	0.569	0.57	0.709	0.736	0.789
chr2	37793318	37793871	0		1	Crb2	0		1	17346	Crb2	0.208	1e-17	0.365	0.341	0.357	0.358	0.596	0.549	0.545
chr5	24591077	24592416	0		1	Chpf2--Mir671	0		0	-367	Mir671	0.208	2e-12	0.396	0.371	0.306	0.413	0.576	0.558	0.602
chr11	69654756	69654856	0		0		0		0	-230	Sox15	0.208	3e-10	0.548	0.496	0.501	0.486	0.68	0.727	0.742
chr5	135029348	135029443	0		0		1	Stx1a	0	5825	Stx1a	0.208	4e-11	0.524	0.461	0.445	0.49	0.725	0.643	0.699
chr7	30313981	30314092	0		1	Alkbh6	0		1	-779	Syne4	0.208	3e-20	0.512	0.487	0.531	0.463	0.755	0.723	0.643
chr1	75492659	75493051	0		1	Obsl1	1	Obsl1	0	13324	Tmem198	0.208	1e-19	0.287	0.287	0.259	0.292	0.493	0.461	0.514
chr4	151012587	151012774	0		1	Per3	0		0	15584	Uts2	0.208	0.0001	0.698	0.633	0.655	0.612	0.811	0.918	0.818
chr12	85476138	85476482	0		1	Fos	0		0	2410	Fos	0.208	6e-15	0.484	0.386	0.366	0.405	0.581	0.605	0.674
chr6	122628713	122628864	0		1	Dppa3	1	Dppa3	0	2365	Dppa3	0.209	2e-08	0.35	0.407	0.409	0.292	0.625	0.564	0.644
chr4	117588965	117589103	0		0		1	Eri3	0	38670	Eri3	0.209	6e-05	0.49	0.446	0.496	0.603	0.629	0.79	0.735
chr1	162282151	162282344	0		0		1	Dnm3	0	58881	Mir214	0.209	0.001	0.533	0.446	0.546	0.592	0.703	0.802	0.767
chr11	107337504	107337741	0		1	Pitpnc1	1	Pitpnc1	0	133098	Pitpnc1	0.209	8e-17	0.534	0.44	0.464	0.581	0.675	0.739	0.728
chr4	124674833	124674932	0		0		0		0	17237	Pou3f1	0.209	3e-18	0.508	0.534	0.535	0.505	0.711	0.716	0.761
chr5	73071370	73071531	0		0		1	Fryl	0	64547	Slc10a4	0.209	8e-06	0.454	0.493	0.504	0.554	0.758	0.631	0.74
chr17	34899836	34899910	0		1	Ehmt2	0		0	900	Ehmt2	0.209	4e-32	0.015	0.036	0.033	0.047	0.249	0.224	0.252
chr19	7196178	7196487	0		1	Macrod1	1	Macrod1	0	9952	Otub1	0.209	5e-22	0.137	0.147	0.165	0.162	0.38	0.34	0.277
chr15	99600227	99600268	0		0		0		0	-1151	Aqp6	0.209	2e-05	0.348	0.414	0.448	0.49	0.688	0.556	0.656
chr17	30635698	30635762	0		1	Dnah8	0		0	8795	Dnah8	0.209	1e-34	0.24	0.214	0.257	0.255	0.5	0.393	0.457
chr9	32835534	32835638	0		0		0		0	139545	Ets1	0.209	2e-14	0.237	0.277	0.314	0.403	0.463	0.625	0.463
chr8	111680637	111680735	0		0		0		0	8988	Mir7076	0.209	3e-20	0.317	0.294	0.386	0.374	0.585	0.478	0.594
chr10	80664700	80664806	0		0		0		0	-7682	Btbd2	0.21	4e-13	0.421	0.403	0.383	0.407	0.62	0.541	0.68
chr3	5574797	5574948	0		0		1	Pex2	0	1376	Pex2	0.21	0.0001	0.703	0.616	0.645	0.634	0.817	0.904	0.857
chr2	167860654	167860801	0		0		0		0	-71598	Ptpn1	0.21	4e-11	0.489	0.518	0.559	0.483	0.669	0.736	0.762
chr11	115323031	115323090	0		1	Otop2	0		0	-1142	Ush1g	0.21	5e-23	0.364	0.399	0.39	0.41	0.569	0.606	0.624
chr9	20972242	20972852	0		0		1	S1pr2	0	4246	S1pr2	0.21	2e-05	0.456	0.42	0.402	0.513	0.603	0.687	0.694
chr2	165310870	165311012	0		0		1	Elmo2	0	5952	Elmo2	0.21	4e-16	0.581	0.607	0.541	0.62	0.759	0.852	0.78
chr19	4441883	4442114	0		0		1	A930001C03Rik	0	2440	A930001C03Rik	0.211	6e-12	0.321	0.405	0.355	0.475	0.589	0.614	0.596
chr2	129947814	129948027	0		0		0		0	-64419	Tgm3	0.211	7e-16	0.533	0.443	0.482	0.452	0.647	0.681	0.737
chr12	23426636	23427022	0		0		0		1	-416586	2410018L13Rik	0.211	5e-09	0.18	0.224	0.222	0.226	0.433	0.427	0.412
chr11	97344003	97344131	0		1	Gpr179	1	Gpr179	0	8006	Gpr179	0.211	5e-13	0.507	0.422	0.456	0.45	0.689	0.668	0.652
chr18	81510481	81510682	0		0		0		1	481498	Mir5127	0.211	0.008	0.513	0.421	0.451	0.399	0.644	0.702	0.626
chr5	115415547	115415633	0		0		0		0	-14094	Msi1	0.211	3e-07	0.473	0.404	0.424	0.506	0.628	0.67	0.693
chr11	6006293	6006618	2	LTR/ERV1/RLTR4_Mm--LTR/ERV1/RLTR4_MM-int	0		1	Camk2b	0	50699	Ykt6	0.211	5e-17	0.759	0.61	0.656	0.741	0.9	0.919	0.887
chr13	66542084	66542132	0		0		0		0	-100990	2410141K09Rik	0.212	0.004	0.572	0.459	0.592	0.56	0.707	0.748	0.811
chr3	153084873	153084960	0		0		0		0	67192	4930482G09Rik	0.212	1e-16	0.533	0.548	0.454	0.559	0.628	0.781	0.8
chr8	85025751	85025891	0		0		0		0	-543	Asna1	0.212	4e-13	0.368	0.364	0.344	0.35	0.556	0.614	0.535
chr11	6244763	6244858	1	LTR/ERV1/RLTR1B-int	0		0		0	-14565	Npc1l1	0.212	3e-12	0.502	0.504	0.503	0.472	0.715	0.709	0.699
chr3	108568010	108568144	0		0		0		0	-3621	Taf13	0.212	9e-10	0.555	0.506	0.514	0.586	0.762	0.738	0.756
chr11	62302681	62302798	0		0		1	Ttc19	0	21268	Ttc19	0.212	3e-05	0.58	0.613	0.672	0.724	0.819	0.923	0.834
chr11	97052263	97052395	0		1	Osbpl7	1	Osbpl7	0	1510	Osbpl7	0.212	5e-12	0.281	0.266	0.321	0.302	0.535	0.49	0.492
chr4	147187695	147187934	0		0		1	Gm13152	1	11949	Gm13152	0.212	2e-34	0.634	0.611	0.587	0.569	0.79	0.827	0.822
chr12	19881849	19882523	0		0		0		1	933593	1700030C10Rik	0.213	7e-12	0.251	0.263	0.303	0.277	0.491	0.496	0.471
chr16	22187749	22187884	1	LTR/ERVK/RMER13B	0		0		0	-24517	Igf2bp2	0.213	0.0002	0.71	0.678	0.702	0.604	0.873	0.858	0.929
chr5	114560518	114560737	0		0		0		0	-7622	Fam222a	0.213	4e-13	0.215	0.197	0.233	0.259	0.482	0.451	0.384
chr8	120972340	120972430	0		0		0		0	110647	Fendrr	0.213	1e-27	0.08	0.115	0.122	0.081	0.274	0.264	0.401
chr9	120602140	120602219	0		0		0		0	24850	5830454E08Rik	0.213	2e-07	0.296	0.348	0.252	0.302	0.462	0.572	0.504
chr10	79675467	79675943	0		1	Tpgs1	0		1	6296	Tpgs1	0.213	3e-15	0.435	0.444	0.423	0.371	0.603	0.674	0.624
chr8	120409438	120409714	0		0		0		0	-79289	Gse1	0.214	1e-07	0.3	0.284	0.377	0.446	0.501	0.588	0.605
chr4	152547606	152548182	0		0		1	Nphp4	0	69753	Nphp4	0.214	2e-17	0.632	0.579	0.635	0.573	0.795	0.828	0.837
chr8	122630331	122630740	0		1	Cbfa2t3	0		1	-7801	Pabpn1l	0.214	3e-09	0.647	0.67	0.691	0.683	0.851	0.907	0.901
chr13	112825769	112825880	0		0		1	Ppap2a	0	25048	Ppap2a	0.214	2e-05	0.523	0.501	0.562	0.596	0.786	0.741	0.753
chr15	78438507	78438643	0		1	Kctd17	0		0	10012	Kctd17	0.214	1e-16	0.334	0.343	0.344	0.317	0.605	0.529	0.513
chr12	41485380	41485407	0		0		1	Immp2l--Lrrn3	0	663	Lrrn3	0.214	2e-08	0.437	0.411	0.404	0.417	0.618	0.605	0.671
chr11	50290611	50290640	0		0		1	Maml1	0	1710	Maml1	0.214	4e-15	0.422	0.394	0.436	0.415	0.599	0.606	0.687
chr3	97312122	97312318	0		0		1	Mir378c	0	2965	Mir378c	0.214	2e-05	0.205	0.218	0.278	0.255	0.361	0.475	0.522
chr19	7421280	7421488	0		1	2700081O15Rik	0		1	-1188	Mir6991	0.214	1e-32	0.618	0.593	0.578	0.591	0.806	0.802	0.821
chr11	105313446	105313734	0		0		1	Mrc2	0	20945	Mrc2	0.214	3e-09	0.554	0.504	0.593	0.614	0.72	0.84	0.782
chr12	69693667	69693758	0		0		1	L2hgdh	0	-11860	Sos2	0.214	7e-13	0.693	0.682	0.751	0.658	0.908	0.916	0.912
chr19	15340178	15340244	0		0		0		0	584411	Psat1	0.215	1e-15	0.671	0.604	0.61	0.626	0.813	0.881	0.834
chr17	34026963	34027028	0		1	H2-Ke6	1	H2-Ke6	0	1059	H2-Ke6	0.215	2e-13	0.279	0.206	0.168	0.253	0.432	0.44	0.454
chr3	96699391	96699665	0		1	Pias3	1	Pias3	0	2453	Pias3	0.215	3e-08	0.332	0.289	0.289	0.273	0.48	0.481	0.573
chr14	66004897	66005110	0		0		1	Gulo	0	4206	Gulo	0.215	4e-12	0.561	0.588	0.537	0.614	0.789	0.839	0.743
chr12	20815005	20815514	0		1	1700030C10Rik	1	1700030C10Rik	1	519	1700030C10Rik	0.216	5e-13	0.234	0.257	0.309	0.246	0.472	0.499	0.456
chr13	19438602	19439286	1	LINE/L1/L1Md_T	0		0		0	-43192	Stard3nl	0.216	3e-21	0.349	0.393	0.356	0.329	0.54	0.572	0.592
chr6	124965129	124965997	0		1	Cops7a	1	Cops7a	1	-166	Cops7a	0.216	1e-32	0.022	0.023	0.024	0.036	0.222	0.253	0.246
chr10	80131070	80131626	0		1	Dos	1	Bc1	1	6039	Dos	0.216	2e-14	0.349	0.333	0.336	0.336	0.538	0.594	0.53
chr18	47304509	47304725	0		0		1	Sema6a	0	64251	Sema6a	0.216	7e-07	0.341	0.324	0.294	0.354	0.44	0.636	0.557
chr1	133408494	133408568	0		0		1	Sox13	0	15681	Sox13	0.216	1e-15	0.392	0.392	0.448	0.508	0.619	0.701	0.635
chr11	33197689	33197815	0		0		0		0	5836	Tlx3	0.216	5e-23	0.25	0.167	0.198	0.07	0.426	0.427	0.311
chr15	79002036	79002196	0		1	Triobp	1	Triobp--Gm10865	0	-106	Mir6956	0.217	0.002	0.349	0.367	0.366	0.499	0.706	0.532	0.598
chr11	88582153	88582227	0		0		1	Msi2	0	136039	Msi2	0.217	5e-07	0.475	0.493	0.486	0.522	0.699	0.719	0.714
chr7	62419796	62420326	0		1	Mkrn3	0		1	78	Mkrn3	0.217	3e-19	0.218	0.246	0.223	0.228	0.455	0.379	0.5
chr9	108431861	108432076	0		0		0		0	-3486	Ccdc36	0.217	0.0008	0.356	0.508	0.384	0.414	0.628	0.594	0.684
chr15	58975201	58975286	0		0		1	Mtss1	0	41435	Ndufb9	0.217	2e-07	0.494	0.417	0.465	0.429	0.628	0.721	0.657
chr4	154540957	154541145	0		0		1	Prdm16	0	95316	5930403L14Rik	0.218	3e-13	0.495	0.397	0.481	0.519	0.653	0.698	0.716
chr14	20737349	20737410	0		1	Camk2g	0		0	-2818	Ndst2	0.218	3e-29	0.655	0.579	0.598	0.643	0.814	0.855	0.839
chr15	85947840	85947931	0		0		1	Celsr1	0	68560	Trmu	0.218	4e-25	0.64	0.691	0.611	0.721	0.843	0.887	0.922
chr5	117307966	117307994	0		0		0		0	-11285	Vsig10	0.218	0.0009	0.353	0.375	0.327	0.386	0.666	0.494	0.576
chr4	100974079	100974138	0		1	Cachd1	0		0	-94929	Raver2	0.218	2e-13	0.557	0.602	0.545	0.626	0.79	0.761	0.851
chr15	83367097	83367220	0		1	1700001L05Rik	0		1	139	1700001L05Rik	0.219	2e-09	0.204	0.21	0.214	0.15	0.378	0.395	0.465
chr5	120252142	120252376	0		0		0		0	-112996	Gm10390	0.219	3e-31	0.09	0.183	0.155	0.132	0.394	0.293	0.404
chr5	115655981	115656101	0		1	Ccdc64	1	Ccdc64	0	10469	Mir7030	0.219	1e-08	0.571	0.55	0.528	0.582	0.772	0.745	0.809
chr8	120548435	120548504	0		0		1	Gse1	0	9775	Mir7687	0.219	3e-23	0.53	0.498	0.56	0.52	0.711	0.775	0.753
chr18	37092001	37092037	0		1	Pcdhac1	1	Pcdha1--Pcdha2--Pcdha3--Pcdha4--Pcdha4-g--Pcdha5--Pcdha6--Pcdha6-g--Pcdha7--Pcdha7-g--Pcdha8--Pcdha9--Pcdha10--Pcdha11--Pcdha12	0	1884	Pcdhac1	0.219	3e-05	0.292	0.326	0.287	0.219	0.497	0.449	0.556
chr5	142963580	142963643	0		0		1	Fscn1	0	3258	Fscn1	0.219	1e-12	0.157	0.14	0.128	0.207	0.353	0.414	0.364
chr9	118082713	118082843	0		0		1	Cmc1	0	42257	Azi2	0.219	2e-13	0.207	0.224	0.218	0.316	0.426	0.475	0.478
chr4	148676486	148677520	0		0		0		0	33687	Gm572	0.219	5e-13	0.441	0.404	0.435	0.475	0.5	0.71	0.608
chr7	129744465	129744572	0		0		0		0	152656	Wdr11	0.219	5e-15	0.394	0.417	0.433	0.503	0.565	0.708	0.694
chr18	18718013	18718101	0		0		0		0	-1137067	4930545E07Rik	0.22	2e-07	0.151	0.235	0.238	0.154	0.39	0.482	0.369
chr12	23633987	23634934	0		0		0		1	462809	9030624G23Rik	0.22	2e-10	0.168	0.178	0.215	0.198	0.403	0.421	0.406
chr4	127419267	127419407	0		0		0		0	-61173	Gjb5	0.22	7e-05	0.13	0.177	0.241	0.263	0.429	0.41	0.431
chr9	48662526	48662618	0		0		1	Zbtb16	0	-57495	Nnmt	0.22	2e-08	0.403	0.443	0.359	0.383	0.552	0.634	0.666
chr3	37641911	37642003	0		0		1	Spry1	0	2008	Spry1	0.22	2e-13	0.446	0.525	0.486	0.659	0.724	0.754	0.767
chr8	84084530	84084723	0		0		1	Rfx1	0	-1472	Mir709	0.22	1e-27	0.203	0.213	0.194	0.22	0.424	0.404	0.453
chr12	24096492	24097573	0		1	9030624G23Rik	1	9030624G23Rik	1	237	9030624G23Rik	0.22	4e-17	0.041	0.045	0.047	0.051	0.256	0.275	0.267
chr4	32249849	32249923	0		0		0		0	-167548	Bach2	0.22	6e-20	0.371	0.417	0.409	0.445	0.616	0.626	0.647
chr5	35079133	35079326	0		1	Dok7	0		0	22147	Dok7	0.22	0.002	0.268	0.334	0.318	0.352	0.521	0.453	0.64
chr5	114596832	114596965	0		0		1	Fam222a	0	28648	Fam222a	0.22	0.0002	0.288	0.304	0.338	0.366	0.462	0.615	0.554
chr15	79470889	79471238	0		0		0		0	-29007	Csnk1e	0.221	0.0003	0.268	0.257	0.263	0.272	0.431	0.513	0.522
chr5	142479090	142479167	0		0		0		0	15198	Ap5z1	0.221	2e-30	0.165	0.16	0.174	0.17	0.394	0.379	0.391
chr5	120626404	120626646	0		1	Ddx54	1	Ddx54	0	7710	Ccdc42b	0.221	6e-23	0.193	0.233	0.206	0.185	0.444	0.399	0.433
chr3	142688089	142688170	1	LTR/ERV1/RLTR1B-int	0		0		0	-12917	Ccbl2	0.221	3e-29	0.702	0.701	0.742	0.702	0.942	0.921	0.935
chr14	48171465	48171635	0		0		1	Peli2	0	-27165	Gm6498	0.222	1e-07	0.514	0.681	0.559	0.814	0.789	0.939	0.873
chr19	7156889	7157009	0		0		1	Macrod1	0	49335	Otub1	0.222	3e-19	0.514	0.483	0.493	0.583	0.715	0.756	0.748
chr5	120492678	120492800	0		1	Plbd2	0		0	10884	Plbd2	0.222	6e-28	0.617	0.663	0.653	0.637	0.878	0.875	0.841
chr4	118265769	118265935	0		0		1	Ptprf	0	25545	Ptprf	0.222	2e-07	0.499	0.533	0.482	0.524	0.776	0.767	0.651
chr18	35823728	35823851	0		0		0		0	-6027	Cxxc5	0.222	4e-16	0.191	0.173	0.258	0.261	0.432	0.436	0.461
chr7	29965145	29965593	0		0		0		1	-13476	Zfp74	0.222	6e-14	0.429	0.514	0.434	0.45	0.69	0.67	0.677
chr8	108407206	108407376	0		0		0		0	177386	3010033K07Rik	0.222	9e-08	0.588	0.546	0.605	0.603	0.809	0.791	0.821
chr11	114642345	114642427	0		0		1	Mir466n	0	-26156	Rpl38	0.222	8e-11	0.567	0.576	0.591	0.55	0.749	0.799	0.831
chr4	43426533	43426989	0		1	Rusc2	0		0	2373	Fam166b	0.223	4e-12	0.457	0.432	0.466	0.52	0.707	0.671	0.705
chr4	145837083	145837349	0		1	Gm13238	0		1	-2	Gm13238	0.223	2e-34	0.564	0.522	0.546	0.544	0.757	0.782	0.763
chr5	147042571	147042800	0		0		1	Lnx2	0	33886	Lnx2	0.223	1e-16	0.557	0.518	0.53	0.561	0.71	0.787	0.795
chr11	116630694	116630777	1	LTR/ERVK/RMER17D2	0		0		0	-3717	Rhbdf2	0.223	9e-18	0.529	0.563	0.63	0.655	0.835	0.777	0.844
chr1	36255176	36255228	0		0		0		0	-10900	Uggt1	0.223	2e-19	0.164	0.213	0.229	0.204	0.406	0.397	0.471
chr2	165317574	165317680	0		0		1	Elmo2	0	-734	Elmo2	0.223	1e-13	0.301	0.235	0.267	0.384	0.522	0.508	0.529
chr14	44299060	44300013	1	LINE/L1/L1Md_T	0		0		0	-86299	1700047E10Rik	0.223	6e-12	0.592	0.532	0.604	0.566	0.788	0.8	0.794
chr12	20311931	20312979	0		0		0		1	503324	1700030C10Rik	0.224	3e-13	0.268	0.256	0.285	0.27	0.482	0.518	0.482
chr12	19387607	19388557	0		0		0		1	873573	5730507C01Rik	0.224	2e-22	0.047	0.057	0.073	0.065	0.287	0.313	0.261
chr4	152129283	152129596	0		0		1	Espn	0	-515	Espn	0.224	3e-08	0.284	0.242	0.213	0.387	0.524	0.462	0.528
chr2	175141558	175141654	0		0		0		0	65311	Gm6710	0.224	1e-32	0.058	0.04	0.079	0.109	0.261	0.314	0.315
chr13	112835288	112835406	0		0		1	Ppap2a	0	34571	Ppap2a	0.224	7e-13	0.362	0.431	0.392	0.392	0.569	0.686	0.6
chr11	101470395	101470495	0		0		1	Rnd2	0	2108	Rnd2	0.224	2e-07	0.373	0.421	0.259	0.356	0.5	0.688	0.539
chr6	6162280	6162427	0		0		1	Slc25a13	0	54819	Slc25a13	0.224	9e-07	0.489	0.624	0.436	0.509	0.707	0.768	0.738
chr15	80159476	80159571	0		0		1	Tab1	0	-14196	Mgat3	0.224	0.0001	0.327	0.28	0.322	0.362	0.569	0.541	0.53
chr4	154472087	154472140	0		0		1	Prdm16	0	164253	5930403L14Rik	0.225	1e-11	0.224	0.316	0.262	0.322	0.458	0.604	0.455
chr13	79973386	79973471	1	LTR/ERV1/RLTR1	0		0		0	-909993	Arrdc3	0.225	2e-06	0.616	0.685	0.7	0.736	0.881	0.896	0.95
chr4	136878276	136878345	0		0		0		0	7867	C1qb	0.225	4e-19	0.481	0.55	0.558	0.536	0.784	0.732	0.752
chr18	30267103	30267419	2	LTR/ERV1/RLTR4_Mm--LTR/ERV1/RLTR4_MM-int	0		0		0	-5634	Pik3c3	0.225	1e-16	0.729	0.769	0.593	0.615	0.856	0.956	0.892
chr5	128842385	128842494	0		0		1	Rimbp2	0	106195	Piwil1	0.225	7e-06	0.39	0.358	0.366	0.43	0.532	0.685	0.613
chr13	55569841	55569962	0		1	Fam193b	0		0	1218	Fam193b	0.225	4e-12	0.226	0.196	0.202	0.246	0.428	0.528	0.371
chr1	34805940	34806001	0		1	Arhgef4	1	Arhgef4	0	4249	Arhgef4	0.225	0.002	0.305	0.312	0.286	0.262	0.496	0.492	0.56
chr9	78821529	78821718	0		0		0		1	206079	Cd109	0.225	4e-21	0.108	0.11	0.153	0.08	0.351	0.398	0.265
chr7	44853745	44855268	0		1	Akt1s1	1	Akt1s1	1	-2639	Pnkp	0.225	6e-19	0.252	0.233	0.219	0.206	0.496	0.438	0.47
chr12	21898552	21899566	0		0		0		1	-481623	Ywhaq	0.225	2e-10	0.281	0.289	0.331	0.298	0.499	0.555	0.522
chr14	105499613	105499691	0		0		1	4930449E01Rik	0	865	4930449E01Rik	0.226	2e-10	0.246	0.224	0.244	0.374	0.416	0.514	0.564
chr8	71693708	71693965	0		1	B3gnt3	1	B3gnt3	1	4585	Insl3	0.226	1e-09	0.084	0.08	0.072	0.087	0.236	0.303	0.382
chr4	149875366	149875553	0		0		0		0	79546	Spsb1	0.226	3e-11	0.346	0.303	0.332	0.452	0.486	0.676	0.594
chr9	122865780	122866032	0		1	Zfp445	1	Zfp445	1	100	Zfp445	0.226	2e-39	0.004	0.004	0.002	0.014	0.257	0.22	0.218
chr12	20071350	20072102	0		0		0		1	744053	1700030C10Rik	0.226	4e-14	0.262	0.296	0.326	0.292	0.511	0.549	0.494
chr16	5244488	5244615	0		1	Alg1--Fam86	0		0	10932	Alg1	0.226	9e-19	0.406	0.41	0.447	0.449	0.611	0.709	0.641
chr10	81252497	81252550	0		0		0		0	-410	Matk	0.226	7e-23	0.319	0.27	0.297	0.279	0.518	0.508	0.525
chr4	137265924	137266087	0		0		0		0	-11628	Wnt4	0.226	3e-06	0.313	0.304	0.297	0.364	0.546	0.506	0.585
chr15	27788214	27788300	0		0		1	Trio	0	-106715	Fam105a	0.227	3e-26	0.492	0.526	0.531	0.598	0.676	0.845	0.768
chr10	62405444	62405592	0		1	Hkdc1	0		0	16939	Hkdc1	0.227	1e-06	0.646	0.615	0.611	0.6	0.869	0.881	0.787
chr5	125150667	125150782	0		0		1	Ncor2	0	28490	Ncor2	0.227	3e-12	0.538	0.498	0.501	0.564	0.717	0.796	0.744
chr17	34895414	34895772	0		1	Zbtb12	0		1	1035	Zbtb12	0.227	3e-08	0.677	0.667	0.63	0.703	0.92	0.812	0.92
chr15	83709902	83710619	0		0		1	Scube1	0	14779	Scube1	0.227	1e-08	0.36	0.315	0.252	0.254	0.412	0.635	0.572
chr12	96511296	96511427	1	LINE/L1/L1Md_T	0		0		0	-464140	1700019M22Rik	0.228	4e-21	0.49	0.547	0.479	0.477	0.731	0.766	0.689
chr4	107016004	107016088	0		0		1	Ssbp3	0	50820	Mrpl37	0.228	2e-17	0.556	0.551	0.601	0.67	0.748	0.872	0.846
chr1	87173664	87173756	0		0		0		0	-9782	Prss56	0.228	1e-17	0.515	0.44	0.459	0.545	0.684	0.73	0.737
chr1	189883763	189883814	0		0		1	Smyd2	0	38500	Smyd2	0.229	4e-22	0.58	0.631	0.628	0.594	0.812	0.844	0.857
chr2	61453952	61454052	0		0		0		0	-124583	Tank	0.229	3e-23	0.537	0.532	0.546	0.602	0.723	0.797	0.828
chr3	41581210	41581453	0		1	Jade1	1	Jade1	0	16453	Jade1	0.229	6e-23	0.315	0.337	0.31	0.333	0.521	0.576	0.558
chr5	92844063	92844172	0		0		1	Shroom3	0	34737	Shroom3	0.229	5e-16	0.381	0.371	0.443	0.519	0.614	0.7	0.658
chr6	136469065	136469277	0		0		0		0	-49679	Atf7ip	0.23	5e-15	0.146	0.112	0.091	0.127	0.4	0.28	0.367
chr8	105253939	105254027	0		1	B3gnt9	0		0	1170	B3gnt9	0.23	1e-23	0.393	0.415	0.395	0.411	0.61	0.638	0.652
chr4	136942866	136943050	0		0		1	Epha8	0	13858	Epha8	0.23	8e-24	0.421	0.387	0.367	0.414	0.587	0.568	0.666
chr9	117102489	117102632	0		0		1	Rbms3	0	149923	Rbms3	0.23	1e-06	0.576	0.569	0.685	0.644	0.805	0.876	0.867
chr1	132521343	132521501	0		0		1	Cntn2	0	15193	Tmem81	0.23	3e-15	0.464	0.523	0.529	0.553	0.776	0.728	0.736
chr15	27997558	27997765	0		0		1	Trio	0	28186	Trio	0.23	2e-18	0.463	0.482	0.532	0.521	0.613	0.799	0.774
chr5	143980967	143980975	0		0		0		0	33882	Ccz1	0.23	0.001	0.409	0.459	0.525	0.436	0.667	0.692	0.702
chr15	76195521	76195645	0		1	Plec	1	Plec	0	127	Plec	0.23	4e-18	0.321	0.354	0.308	0.283	0.519	0.518	0.599
chr13	55483628	55483699	0		0		1	Dbn1	0	4412	Dbn1	0.231	6e-25	0.532	0.523	0.512	0.63	0.737	0.824	0.779
chr19	47510599	47510942	0		0		1	Obfc1	0	-2211	Gm19557	0.231	3e-10	0.487	0.468	0.491	0.534	0.74	0.756	0.682
chr4	155174165	155174185	0		0		1	Ski	0	48360	Ski	0.231	0.0004	0.276	0.34	0.359	0.473	0.622	0.644	0.514
chr5	104571516	104571601	0		0		0		0	45824	D930016D06Rik	0.231	8e-32	0.009	0.023	0.014	0.026	0.25	0.316	0.18
chr5	121982034	121982150	0		0		1	Cux2	0	65733	Cux2	0.231	2e-12	0.408	0.434	0.469	0.476	0.756	0.661	0.618
chr12	20815904	20816061	0		0		0		1	-203	1700030C10Rik	0.232	1e-32	0.13	0.182	0.207	0.191	0.371	0.42	0.437
chrX	75723898	75723956	0		0		0		1	40772	4933407K13Rik	0.232	3e-25	0.516	0.748	0.821	0.519	0.929	0.807	0.912
chr8	120231052	120231138	0		0		0		0	-2865	A330074K22Rik	0.232	7e-29	0.28	0.219	0.231	0.35	0.43	0.56	0.516
chr13	55171599	55172362	0		0		0		0	19163	Fgfr4	0.232	2e-06	0.23	0.274	0.236	0.216	0.421	0.472	0.489
chr12	8913075	8913166	0		0		0		0	-8186	Laptm4a	0.232	5e-27	0.234	0.223	0.278	0.303	0.464	0.508	0.504
chr3	152264897	152264972	0		0		1	Nexn	0	1386	Nexn	0.232	1e-31	0.357	0.367	0.377	0.388	0.545	0.622	0.645
chr2	28534585	28534660	0		0		1	Ralgds	0	1159	Ralgds	0.233	3e-18	0.43	0.424	0.488	0.527	0.656	0.721	0.723
chr4	134784722	134784778	0		0		0		0	-16746	Ldlrap1	0.233	6e-05	0.433	0.553	0.502	0.61	0.789	0.785	0.7
chr12	98677589	98677665	0		1	Ptpn21	0		0	49486	Spata7	0.233	3e-28	0.494	0.488	0.482	0.475	0.743	0.66	0.751
chr8	120550590	120550715	0		0		1	Gse1	0	11957	Mir7687	0.233	4e-15	0.154	0.203	0.261	0.225	0.412	0.48	0.439
chr14	122230774	122230923	0		0		1	Clybl--1700108J01Rik	0	2790	1700108J01Rik	0.234	5e-06	0.33	0.402	0.401	0.431	0.516	0.704	0.661
chr13	112652189	112652468	0		1	Ddx4	1	Ddx4	1	-18	Ddx4	0.234	1e-19	0.61	0.523	0.518	0.597	0.792	0.814	0.785
chr18	70582419	70582543	0		0		1	Mbd2	0	14190	Mbd2	0.234	2e-22	0.509	0.434	0.577	0.528	0.705	0.788	0.745
chr13	44840728	44840803	0		0		1	Jarid2	0	109496	Jarid2	0.234	7e-12	0.076	0.071	0.079	0.162	0.338	0.319	0.336
chr4	118744081	118744129	1	LTR/ERVK/MMERVK9C_I-int	0		0		0	9575	Olfr1339	0.235	0.004	0.693	0.628	0.737	0.61	0.912	0.92	0.874
chr12	86881884	86882679	0		1	Irf2bpl	0		1	2532	Irf2bpl	0.235	1e-31	0.026	0.029	0.03	0.034	0.278	0.257	0.26
chr6	72215737	72215754	0		0		1	Atoh8	0	19831	Atoh8	0.235	0.0003	0.424	0.365	0.436	0.519	0.572	0.662	0.78
chr4	103954028	103954055	0		0		0		0	-413495	Dab1	0.235	9e-08	0.349	0.438	0.411	0.455	0.578	0.609	0.756
chr12	19606396	19607485	0		0		0		1	1092431	5730507C01Rik	0.236	5e-16	0.206	0.252	0.264	0.259	0.477	0.492	0.476
chrX	168508585	168508660	1	LTR/ERVK/MMERVK9C_I-int	0		1	Frmpd4	0	68611	Frmpd4	0.236	9e-07	0.687	0.671	0.548	0.665	0.894	0.847	0.896
chr8	125876242	125876313	0		0		1	Pcnxl2	0	22039	Pcnxl2	0.236	0.0005	0.635	0.531	0.607	0.721	0.769	0.848	0.959
chr13	65351955	65352285	0		0		0		1	73267	Zfp369	0.236	3e-21	0.058	0.069	0.057	0.084	0.283	0.33	0.297
chr10	117432672	117432755	0		0		0		0	-55741	Cpsf6	0.236	2e-27	0.14	0.14	0.152	0.15	0.455	0.311	0.377
chr8	124750185	124750307	0		0		1	Fam89a	0	1563	Fam89a	0.237	6e-08	0.524	0.538	0.549	0.526	0.792	0.73	0.788
chr4	152548578	152548722	0		0		1	Nphp4	0	70509	Nphp4	0.237	7e-13	0.362	0.346	0.329	0.374	0.554	0.619	0.599
chr5	114574996	114575106	0		0		1	Fam222a	0	6801	Fam222a	0.238	0.008	0.423	0.341	0.362	0.359	0.603	0.654	0.574
chr5	140331060	140331193	0		1	Ftsj2	0		0	772	Ftsj2	0.238	2e-07	0.485	0.473	0.522	0.504	0.78	0.786	0.636
chr7	80587704	80588028	0		1	Crtc3	0		0	-48150	Gm15880	0.238	2e-07	0.359	0.392	0.388	0.386	0.622	0.656	0.579
chr14	14345577	14345819	0		0		0		1	-796	Il3ra	0.238	8e-32	0.017	0.016	0.01	0.02	0.267	0.164	0.332
chr6	85224486	85224644	0		0		1	Sfxn5	0	36635	Emx1	0.239	2e-14	0.321	0.302	0.312	0.364	0.61	0.576	0.509
chr10	62183579	62183692	0		0		0		0	10591	Mir7662	0.239	0.0001	0.315	0.378	0.318	0.348	0.513	0.631	0.589
chr18	50046399	50046561	0		0		1	Tnfaip8	0	-6801	Tnfaip8	0.239	3e-09	0.422	0.44	0.375	0.587	0.568	0.857	0.663
chr8	71461587	71461831	0		1	Abhd8	0		1	1948	Abhd8	0.239	5e-19	0.597	0.627	0.642	0.616	0.824	0.882	0.872
chr7	35371359	35371440	0		0		1	Rhpn2	0	25367	C230052I12Rik	0.239	7e-20	0.489	0.478	0.44	0.559	0.595	0.835	0.758
chr2	63971280	63971369	0		0		0		0	126714	Fign	0.239	9e-20	0.3	0.348	0.394	0.452	0.555	0.61	0.672
chr11	90033334	90033356	0		0		1	Tmem100	0	2998	Tmem100	0.239	8e-10	0.355	0.317	0.456	0.466	0.568	0.686	0.658
chr12	112545073	112545144	0		0		0		0	-33948	Tmem179	0.239	9e-11	0.34	0.412	0.39	0.56	0.625	0.696	0.669
chr7	19426030	19426274	0		1	Mark4	0		1	-4735	A930016O22Rik	0.24	5e-09	0.677	0.671	0.63	0.706	0.917	0.915	0.902
chr15	101052374	101052473	0		1	Fignl2	0		0	1975	Fignl2	0.24	2e-10	0.536	0.482	0.622	0.544	0.835	0.782	0.742
chr19	44649906	44650053	0		0		0		0	87127	Hif1an	0.24	1e-08	0.184	0.144	0.071	0.095	0.322	0.438	0.329
chr12	13086054	13086220	0		0		0		0	-144301	Mycn	0.24	1e-15	0.522	0.5	0.553	0.632	0.734	0.816	0.824
chr6	84431465	84431592	0		0		0		0	-7690	Gm10445	0.241	3e-05	0.304	0.311	0.348	0.403	0.56	0.604	0.58
chr5	118567608	118567680	0		0		1	Med13l	0	6926	Med13l	0.241	6e-27	0.244	0.275	0.268	0.329	0.447	0.566	0.543
chr11	119126583	119126761	0		0		0		0	27465	Mir6934	0.241	0.002	0.311	0.442	0.354	0.508	0.582	0.649	0.706
chr18	37089948	37090536	0		1	Pcdhac1	1	Pcdha1--Pcdha2--Pcdha3--Pcdha4--Pcdha4-g--Pcdha5--Pcdha6--Pcdha6-g--Pcdha7--Pcdha7-g--Pcdha8--Pcdha9--Pcdha10--Pcdha11--Pcdha12	1	107	Pcdhac1	0.242	5e-18	0.143	0.15	0.134	0.154	0.389	0.38	0.388
chr17	28876789	28876932	0		1	Pnpla1	1	Pnpla1	0	18450	Pnpla1	0.243	0.0005	0.37	0.298	0.333	0.291	0.595	0.607	0.489
chr8	121374542	121374668	0		0		0		0	167349	1700018B08Rik	0.243	3e-17	0.237	0.26	0.231	0.194	0.532	0.38	0.51
chr12	20845338	20845390	1	LTR/ERVK/IAPEY4_I-int	0		0		0	-29585	1700030C10Rik	0.243	9e-27	0.451	0.609	0.591	0.532	0.874	0.724	0.769
chr9	88719653	88719794	0		1	Gm2382	0		1	74	Gm2382	0.243	2e-27	0.005	0.014	0.019	0.019	0.19	0.241	0.339
chr4	154984036	154984225	0		1	Plch2	0		1	19998	Pank4	0.243	2e-09	0.541	0.517	0.506	0.499	0.752	0.761	0.764
chr17	34671262	34672742	0		1	Tnxb	0		1	1468	Tnxb	0.243	2e-16	0.156	0.149	0.155	0.169	0.545	0.332	0.322
chr19	41088595	41088767	0		1	Tll2	1	Tll2	1	-11568	Opalin	0.243	1e-12	0.397	0.436	0.444	0.432	0.662	0.627	0.72
chr17	25624861	25625022	0		0		1	Lmf1	0	45769	Lmf1	0.244	3e-19	0.588	0.652	0.646	0.777	0.866	0.951	0.911
chr12	109614562	109614705	0		0		1	Rian	0	2813	Mir1188	0.244	6e-16	0.489	0.385	0.47	0.558	0.666	0.789	0.702
chr17	27324812	27324979	0		0		0		0	-3488	Mir7216	0.244	2e-12	0.374	0.378	0.42	0.404	0.64	0.554	0.721
chr5	119381597	119381747	0		0		0		0	-181654	Gm7538	0.245	3e-19	0.612	0.586	0.665	0.793	0.918	0.914	0.895
chr6	83316145	83316279	0		0		1	Mthfd2	0	1392	Mthfd2	0.245	3e-21	0.212	0.207	0.225	0.303	0.415	0.553	0.479
chr11	117317408	117317988	0		0		1	Sept9	0	-14016	Sept9	0.245	1e-15	0.308	0.253	0.33	0.371	0.489	0.614	0.545
chr4	117317481	117317619	0		0		1	Rnf220	0	65211	Tmem53	0.245	3e-19	0.421	0.456	0.391	0.386	0.667	0.678	0.633
chr10	117045312	117045825	0		1	Lrrc10	0		0	228	Lrrc10	0.246	3e-16	0.453	0.459	0.481	0.414	0.693	0.713	0.687
chr11	120011881	120012479	0		1	Aatk	1	Aatk	1	-2586	Mir3065	0.246	4e-25	0.465	0.399	0.504	0.448	0.628	0.737	0.716
chr15	78889697	78889764	0		1	Gga1	1	Gga1	0	-2109	Mir6955	0.246	4e-15	0.208	0.239	0.215	0.218	0.471	0.434	0.493
chr2	173584482	173584585	0		0		1	Ppp4r1l-ps	0	-6193	Ankrd60	0.247	5e-12	0.22	0.206	0.297	0.254	0.427	0.504	0.542
chr5	135108002	135108235	0		0		1	Mlxipl	0	1228	Mlxipl	0.247	3e-28	0.148	0.136	0.094	0.155	0.465	0.416	0.315
chr18	37294791	37294871	0		1	Pcdhb2	1	Pcdha4-g--Pcdha6-g--Pcdha7-g	0	-8	Pcdhb2	0.247	1e-28	0.181	0.227	0.221	0.225	0.424	0.501	0.459
chr10	82241213	82241293	0		1	Zfp938	0		0	22	Zfp938	0.247	3e-34	0.017	0.027	0.014	0.04	0.204	0.392	0.222
chr4	148885627	148886034	0		0		1	Casz1	0	81439	Casz1	0.247	3e-24	0.414	0.438	0.409	0.478	0.607	0.724	0.701
chr12	73551175	73551301	0		1	2210039B01Rik	0		0	2756	2210039B01Rik	0.248	2e-11	0.419	0.522	0.525	0.562	0.766	0.734	0.766
chr7	114657009	114657141	0		0		0		0	-20718	Calca	0.248	6e-20	0.15	0.183	0.312	0.227	0.432	0.459	0.509
chr8	84210455	84210598	0		0		0		0	-1619	Mir3074-2	0.248	6e-22	0.187	0.189	0.217	0.226	0.462	0.465	0.431
chr12	111693407	111693547	0		0		0		0	15373	Trmt61a	0.249	8e-17	0.391	0.37	0.33	0.408	0.674	0.565	0.633
chr10	81304827	81304894	0		0		1	Pip5k1c	0	11898	Pip5k1c	0.249	2e-12	0.235	0.214	0.207	0.21	0.505	0.436	0.453
chr5	135258281	135258954	0		0		0		0	-7571	Fzd9	0.25	2e-18	0.368	0.333	0.295	0.334	0.585	0.584	0.598
chr11	77471553	77471862	0		1	Ankrd13b	0		1	7796	Coro6	0.25	3e-18	0.634	0.589	0.59	0.607	0.854	0.835	0.872
chr14	14347090	14347341	0		1	Il3ra	1	Il3ra	0	722	Il3ra	0.25	5e-07	0.547	0.597	0.697	0.599	0.818	0.854	0.907
chr8	120540339	120540417	0		0		1	Gse1	0	1683	Mir7687	0.25	3e-32	0.359	0.353	0.384	0.405	0.567	0.674	0.635
chr9	74186822	74186983	0		0		1	Wdr72	0	76569	Wdr72	0.25	8e-06	0.333	0.383	0.347	0.38	0.47	0.743	0.62
chr17	35424788	35425389	0		1	H2-Q8--H2-Q6	1	H2-Q8--H2-Q6	1	242	H2-Q8	0.251	9e-35	0.024	0.027	0.019	0.027	0.369	0.221	0.237
chr2	167892194	167892224	0		0		0		0	-40117	Ptpn1	0.251	0.004	0.274	0.209	0.152	0.307	0.45	0.513	0.496
chr7	128389224	128389364	0		0		1	Rgs10	0	28878	Rgs10	0.251	1e-08	0.382	0.352	0.389	0.376	0.53	0.674	0.69
chr17	87352739	87352900	0		0		1	Ttc7	0	69935	Ttc7	0.251	9e-06	0.357	0.388	0.398	0.272	0.592	0.605	0.618
chr7	19586373	19586785	0		1	Clasrp	1	Clasrp	1	9293	Zfp296	0.251	3e-22	0.665	0.691	0.657	0.626	0.897	0.915	0.922
chr5	136982585	136982715	0		1	Znhit1	1	Znhit1	0	-4368	Plod3	0.252	2e-30	0.345	0.32	0.341	0.365	0.58	0.597	0.607
chrX	101698490	101698562	0		0		0		1	35621	Cxcr3	0.252	9e-13	0.602	0.486	0.474	0.601	0.823	0.742	0.82
chr14	72916107	72916153	1	LINE/L1/L1Md_T	0		0		0	-109472	Gm9199	0.252	8e-13	0.659	0.72	0.821	0.676	0.969	0.977	0.966
chr19	33761393	33761494	0		0		0		0	-171133	Lipo1	0.252	7e-31	0.312	0.248	0.269	0.217	0.469	0.577	0.498
chr14	7853858	7853909	0		0		1	Flnb	0	35928	Flnb	0.253	2e-08	0.452	0.364	0.515	0.577	0.638	0.863	0.688
chr1	55235424	55235490	0		0		0		0	-1719	Mars2	0.253	5e-27	0.407	0.446	0.455	0.384	0.718	0.641	0.671
chr12	19288194	19289268	0		0		0		1	774222	5730507C01Rik	0.254	5e-17	0.102	0.122	0.153	0.124	0.398	0.381	0.355
chr7	19087374	19087501	0		0		1	Dmpk	0	611	Mir3100	0.254	4e-15	0.386	0.444	0.376	0.41	0.714	0.599	0.664
chr9	70298270	70298498	0		0		1	Myo1e	0	91035	Myo1e	0.254	8e-15	0.54	0.599	0.53	0.603	0.75	0.899	0.82
chr19	8252220	8252277	0		0		0		0	-33409	Slc22a29	0.254	3e-26	0.041	0.138	0.077	0.112	0.457	0.318	0.264
chr17	34915688	34915805	0		0		1	Slc44a4	0	1281	Slc44a4	0.254	7e-13	0.172	0.194	0.154	0.191	0.422	0.437	0.438
chr7	44898671	44899100	0		1	Fuz	1	Fuz	0	2808	Fuz	0.255	3e-28	0.467	0.466	0.447	0.486	0.748	0.704	0.722
chr8	84131005	84131092	0		1	Podnl1	0		1	5060	Podnl1	0.255	2e-32	0.391	0.396	0.409	0.423	0.635	0.684	0.661
chr7	37343116	37343262	0		0		0		0	426563	Zfp536	0.255	6e-05	0.247	0.328	0.303	0.272	0.46	0.598	0.571
chr12	56524835	56524972	0		0		1	E030019B13Rik	0	4516	E030019B13Rik	0.256	3e-11	0.534	0.545	0.535	0.457	0.77	0.76	0.791
chr18	36992735	36993114	0		1	Pcdha8	1	Pcdha1--Pcdha2--Pcdha3--Pcdha4--Pcdha4-g--Pcdha5--Pcdha6--Pcdha6-g--Pcdha7--Pcdha7-g	0	458	Pcdha8	0.256	7e-08	0.3	0.344	0.423	0.355	0.596	0.56	0.637
chr11	36001886	36002068	0		0		0		0	-21888	Wwc1	0.256	0.0005	0.556	0.479	0.552	0.496	0.759	0.735	0.838
chr5	137584074	137584198	0		0		1	Tfr2	0	13332	Tfr2	0.257	1e-23	0.189	0.172	0.201	0.211	0.57	0.349	0.432
chr17	35060264	35061027	0		1	Ddah2	1	Ddah2	0	1612	Ddah2	0.258	6e-10	0.502	0.572	0.575	0.657	0.834	0.818	0.85
chr3	89186804	89187513	0		1	Fam189b	1	Fam189b	1	3934	Fam189b	0.258	1e-14	0.517	0.473	0.474	0.492	0.764	0.737	0.741
chr8	121063721	121064011	0		0		1	Fendrr	0	19166	Fendrr	0.258	2e-11	0.502	0.462	0.548	0.546	0.73	0.814	0.776
chr7	28468131	28468184	0		0		1	Mir466f-2	0	15921	Lrfn1	0.258	7e-20	0.499	0.492	0.539	0.48	0.756	0.77	0.757
chr10	79797468	79797562	0		0		1	Palm--Bc1	0	3944	Palm	0.258	3e-32	0.329	0.289	0.42	0.35	0.587	0.612	0.617
chr18	54278213	54278391	0		0		0		0	-143992	Redrum	0.258	7e-06	0.461	0.711	0.629	0.783	0.868	0.923	0.921
chr7	98887914	98888399	0		1	Uvrag	0		0	49312	Wnt11	0.258	2e-28	0.573	0.582	0.593	0.574	0.816	0.859	0.848
chr2	168872020	168872555	0		0		0		0	83299	Zfp64	0.258	2e-13	0.148	0.164	0.145	0.207	0.386	0.446	0.44
chr4	146475193	146475462	0		0		0		1	26299	Gm13251	0.259	1e-30	0.469	0.457	0.468	0.463	0.686	0.751	0.732
chr11	84760992	84761037	0		0		0		0	-40582	1700109G15Rik	0.259	0.0008	0.545	0.358	0.251	0.444	0.666	0.639	0.672
chr1	38210545	38210664	0		1	Aff3	1	Aff3	0	-80942	Rev1	0.26	4e-20	0.321	0.316	0.376	0.305	0.568	0.606	0.598
chr16	72678696	72678774	0		0		1	Robo1	0	15587	Robo1	0.26	1e-17	0.436	0.389	0.472	0.658	0.638	0.852	0.755
chr5	23712503	23712701	0		1	AI506816	1	AI506816	1	65	AI506816	0.261	3e-21	0.009	0.032	0.031	0.03	0.174	0.32	0.364
chr5	144191086	144191246	0		1	Bhlha15	0		1	881	Bhlha15	0.261	6e-27	0.514	0.49	0.485	0.456	0.71	0.8	0.736
chr17	47919987	47920410	0		0		1	Foxp4	0	4434	Foxp4	0.261	4e-05	0.437	0.454	0.47	0.556	0.756	0.732	0.772
chr2	173254254	173254338	0		0		1	Pmepa1	0	22237	Pmepa1	0.261	8e-16	0.486	0.385	0.548	0.484	0.738	0.765	0.704
chr11	69557297	69557418	0		1	Efnb3	0		0	2879	Efnb3	0.262	2e-09	0.296	0.348	0.27	0.328	0.597	0.45	0.673
chr13	97259728	97259836	0		0		0		0	18678	Enc1	0.262	2e-24	0.566	0.507	0.512	0.523	0.752	0.818	0.796
chr17	35425767	35425822	0		1	H2-Q8--H2-Q6	0		1	918	H2-Q6	0.262	1e-37	0.112	0.122	0.111	0.127	0.478	0.313	0.35
chr12	108119402	108119534	0		0		1	Setd3	0	59816	Setd3	0.263	6e-13	0.507	0.456	0.44	0.577	0.672	0.822	0.779
chr13	62466678	62466820	0		1	Zfp935	1	Zfp935	0	63	Zfp935	0.263	3e-37	0.004	0.01	0.009	0.006	0.3	0.274	0.237
chr18	10051987	10052171	0		0		0		0	-21930	Usp14	0.264	6e-10	0.52	0.238	0.336	0.275	0.67	0.54	0.61
chr3	68782440	68782543	0		0		0		0	-87093	1110032F04Rik	0.264	2e-13	0.471	0.371	0.539	0.595	0.64	0.857	0.774
chr6	113600538	113600588	0		0		1	Fancd2os	0	152	Fancd2os	0.266	4e-35	0.464	0.438	0.443	0.349	0.68	0.675	0.712
chr18	45024065	45024146	1	LINE/L1/L1Md_T	0		0		0	195442	Ythdc2	0.266	8e-08	0.384	0.442	0.474	0.368	0.733	0.817	0.496
chr5	44538209	44538316	0		0		1	Ldb2	0	261484	Ldb2	0.267	8e-14	0.515	0.445	0.276	0.46	0.562	0.828	0.68
chr13	94562842	94562943	0		0		1	Ap3b1	0	203933	Ap3b1	0.267	2e-28	0.491	0.509	0.493	0.622	0.731	0.832	0.822
chr4	151983100	151983785	0		1	Thap3	1	Thap3	0	5544	Thap3	0.267	2e-13	0.523	0.533	0.458	0.458	0.76	0.725	0.791
chr6	90782108	90782294	0		0		1	Iqsec1	0	27922	Iqsec1	0.267	9e-06	0.415	0.409	0.408	0.401	0.649	0.675	0.7
chr8	70331281	70331823	0		1	Gdf1--Cers1--Upf1	0		1	1788	Gdf1	0.268	2e-30	0.696	0.626	0.638	0.591	0.893	0.926	0.898
chr2	75608651	75608773	0		0		0		0	-50546	Hnrnpa3	0.268	2e-28	0.389	0.404	0.423	0.358	0.629	0.622	0.736
chr12	23800170	23801235	0		0		0		1	296567	9030624G23Rik	0.269	8e-14	0.157	0.165	0.189	0.177	0.412	0.494	0.419
chr5	109557517	109557715	0		1	Crlf2	1	Crlf2	0	1377	Crlf2	0.269	7e-20	0.004	0.009	0.011	0.015	0.198	0.27	0.348
chr8	121310990	121311070	0		0		0		0	183346	Foxl1	0.269	7e-33	0.166	0.186	0.196	0.23	0.452	0.466	0.476
chr5	147133628	147133684	0		0		0		0	-55039	Gsx1	0.269	2e-07	0.356	0.283	0.442	0.38	0.696	0.619	0.594
chr5	113332384	113332484	0		0		0		0	5211	Mir7230	0.27	2e-19	0.274	0.33	0.311	0.262	0.61	0.464	0.619
chr8	20122701	20122802	0		0		0		1	174680	6820431F20Rik	0.271	6e-41	0.326	0.286	0.321	0.312	0.572	0.599	0.593
chr13	66007556	66007718	0		0		0		1	-105815	Gm10324	0.271	2e-07	0.23	0.27	0.255	0.325	0.576	0.488	0.56
chr13	13415234	13415320	0		0		0		0	-21653	Gpr137b	0.271	5e-09	0.364	0.384	0.448	0.346	0.644	0.608	0.718
chr7	7277708	7278426	1	LINE/L1/L1Md_F2	1	Vmn2r29	1	Vmn2r29	1	222	Vmn2r29	0.271	4e-30	0.351	0.377	0.402	0.414	0.699	0.658	0.636
chr4	112979415	112979796	0		0		1	Skint6	1	-204745	Skint10	0.272	2e-19	0.137	0.149	0.163	0.209	0.436	0.437	0.435
chr16	8562615	8562747	1	LTR/ERVK/MMERVK9C_I-int	0		1	Abat	0	49253	Abat	0.273	9e-19	0.225	0.358	0.309	0.298	0.501	0.538	0.676
chr7	45808483	45808641	0		0		1	Cyth2	0	5754	Cyth2	0.273	0.001	0.488	0.381	0.441	0.439	0.829	0.667	0.636
chr11	102665556	102665931	0		1	Gm1564	1	Gm1564	1	160	Gm1564	0.273	6e-09	0.465	0.476	0.452	0.46	0.693	0.748	0.766
chr2	34645067	34645202	0		0		0		0	110098	Gapvd1	0.273	2e-29	0.221	0.289	0.212	0.258	0.57	0.44	0.544
chr11	119130156	119130346	0		0		0		0	23886	Mir6934	0.273	0.0001	0.16	0.248	0.315	0.177	0.455	0.412	0.631
chr19	47338614	47338808	0		0		1	Sh3pxd2a	0	-65122	Mir6995	0.273	1e-06	0.4	0.548	0.497	0.52	0.77	0.645	0.877
chr14	27050703	27050861	0		0		1	Il17rd	0	11782	Il17rd	0.273	5e-15	0.376	0.358	0.389	0.525	0.649	0.689	0.715
chr11	116498680	116498861	0		0		0		1	-8424	Prpsap1	0.274	1e-33	0.192	0.253	0.208	0.216	0.457	0.475	0.543
chr9	89066578	89067123	0		0		0		1	25985	Trim43b	0.274	8e-16	0.552	0.638	0.746	0.552	0.92	0.832	0.937
chr10	75853400	75853573	0		0		0		0	6764	Mif	0.275	3e-12	0.467	0.496	0.412	0.529	0.775	0.742	0.739
chr18	30267913	30268033	1	LTR/ERV1/RLTR4_MM-int	0		0		0	-4922	Pik3c3	0.275	2e-30	0.659	0.757	0.476	0.56	0.844	0.901	0.915
chr11	69855564	69855655	0		1	Tnk1	0		0	3120	Tnk1	0.276	7e-38	0.307	0.299	0.258	0.331	0.542	0.611	0.571
chr2	176798854	176799088	0		0		1	Gm14295	0	372	Gm14295	0.276	2e-25	0.178	0.196	0.199	0.197	0.461	0.539	0.405
chr17	34038465	34038737	0		0		0		0	-835	Col11a2	0.277	1e-26	0.144	0.143	0.155	0.147	0.413	0.404	0.454
chr13	65258698	65259460	0		0		0		1	-19774	Zfp369	0.278	6e-14	0.351	0.343	0.329	0.284	0.602	0.619	0.598
chr17	28300410	28300597	0		1	Ppard	0		0	-13025	Fance	0.278	9e-17	0.428	0.4	0.459	0.597	0.674	0.769	0.806
chr13	66641890	66641946	0		0		0		0	-200800	2410141K09Rik	0.279	4e-06	0.394	0.406	0.467	0.384	0.73	0.679	0.666
chr8	120004485	120004651	0		0		1	Crispld2	0	12099	Crispld2	0.279	1e-17	0.547	0.42	0.439	0.585	0.679	0.777	0.875
chr6	148355260	148355427	0		1	Rps4l	1	Tmtc1	1	689	Rps4l	0.279	2e-35	0.545	0.538	0.509	0.514	0.8	0.821	0.796
chr1	179609855	179610138	0		1	Cnst	0		0	-58234	Sccpdh	0.28	2e-25	0.426	0.467	0.453	0.494	0.724	0.73	0.765
chr1	155218310	155218498	0		0		0		0	59702	Stx6	0.28	1e-05	0.316	0.288	0.277	0.368	0.657	0.509	0.608
chr18	38584248	38584444	0		0		0		0	16922	Spry4	0.28	5e-19	0.472	0.5	0.45	0.494	0.714	0.791	0.773
chr5	120225389	120225773	0		0		0		0	-86318	Gm10390	0.281	2e-17	0.396	0.436	0.368	0.481	0.647	0.79	0.696
chr8	84995649	84995815	0		1	Hook2	1	Hook2	0	5138	Hook2	0.281	5e-12	0.275	0.371	0.27	0.324	0.627	0.521	0.626
chr6	125803450	125803618	0		0		1	Ano2	0	113116	Ano2	0.282	9e-08	0.556	0.516	0.443	0.506	0.787	0.818	0.756
chr10	19868867	19868957	0		0		1	Pex7	0	-17453	Slc35d3	0.282	1e-16	0.355	0.371	0.363	0.393	0.593	0.724	0.643
chr5	117125776	117125964	0		0		1	Taok3	0	5742	Taok3	0.283	0.002	0.555	0.729	0.645	0.464	0.944	0.862	0.838
chr11	78348544	78348724	0		1	Unc119	0		0	5113	Unc119	0.284	3e-12	0.533	0.451	0.476	0.666	0.778	0.898	0.768
chr8	122880098	122880157	0		0		0		0	31755	Cdh15	0.284	7e-16	0.391	0.425	0.426	0.522	0.662	0.758	0.758
chr15	83699187	83699278	0		0		1	Scube1	0	25807	Scube1	0.284	5e-27	0.428	0.447	0.375	0.527	0.685	0.756	0.744
chr14	56998219	56998254	1	LINE/L1/L1Md_T	0		0		0	-16897	B020004C17Rik	0.284	5e-16	0.619	0.597	0.64	0.589	0.873	0.908	0.903
chr11	98019312	98019621	0		0		1	Cacnb1	0	-1094	Cacnb1	0.284	3e-09	0.153	0.15	0.066	0.084	0.383	0.383	0.428
chr17	27366243	27366288	0		0		0		0	8170	Mir7218	0.284	1e-18	0.63	0.584	0.637	0.63	0.903	0.89	0.919
chr15	76461291	76461491	0		0		1	Bop1	0	3954	Scx	0.285	6e-18	0.419	0.371	0.389	0.447	0.699	0.703	0.671
chr5	109645206	109645341	1	LTR/ERVK/IAPEY4_I-int	0		0		0	-86281	Crlf2	0.285	2e-18	0.454	0.633	0.578	0.428	0.795	0.847	0.786
chr4	98756405	98756502	0		1	Kank4	0		0	29701	L1td1	0.285	3e-22	0.502	0.537	0.438	0.621	0.776	0.854	0.797
chr5	123115076	123115209	0		1	Tmem120b	1	Tmem120b	0	17487	Rhof	0.285	2e-06	0.26	0.258	0.332	0.263	0.608	0.526	0.468
chr11	102311382	102311461	0		1	Ubtf	0		0	5865	Ubtf	0.286	8e-16	0.438	0.578	0.566	0.548	0.826	0.825	0.801
chr15	100839070	100839086	0		0		0		0	-31566	Scn8a	0.286	2e-17	0.193	0.146	0.212	0.236	0.538	0.478	0.434
chr12	79746152	79746589	0		0		1	Rad51b	0	366643	Zfp36l1	0.287	3e-17	0.313	0.271	0.364	0.495	0.55	0.739	0.652
chr18	74294988	74295229	0		0		1	Cfap53	0	12009	Cfap53	0.288	2e-26	0.363	0.455	0.443	0.358	0.758	0.651	0.67
chr18	65892826	65892985	0		0		0		0	19428	Grp	0.289	8e-12	0.572	0.483	0.476	0.432	0.817	0.765	0.752
chr17	39011427	39011505	0		0		0		0	-25228	Esp24	0.29	6e-36	0.108	0.159	0.165	0.199	0.452	0.467	0.427
chr13	66199850	66199950	0		0		0		1	86448	Gm10324	0.29	2e-32	0.098	0.101	0.109	0.142	0.436	0.398	0.376
chr9	108111475	108111544	0		1	Bsn	0		0	-17030	Apeh	0.292	4e-30	0.168	0.095	0.104	0.13	0.38	0.405	0.462
chr8	14992800	14992980	0		0		1	Arhgef10	0	-18134	Kbtbd11	0.293	3e-29	0.523	0.412	0.474	0.605	0.721	0.849	0.818
chr18	75047253	75047442	0		0		1	Dym	0	28577	Dym	0.294	9e-05	0.286	0.339	0.442	0.292	0.702	0.479	0.722
chr17	34651660	34651718	0		1	Atf6b	0		0	4544	Atf6b	0.294	6e-35	0.329	0.336	0.354	0.386	0.654	0.648	0.634
chr11	115270317	115270535	0		1	Fdxr	1	Fdxr	0	-3183	Grin2c	0.294	3e-06	0.495	0.499	0.467	0.467	0.774	0.749	0.804
chr1	135543544	135543628	0		0		1	Nav1	0	41769	Nav1	0.294	6e-17	0.45	0.405	0.515	0.52	0.698	0.812	0.787
chr7	27257354	27257451	0		1	Adck4	0		0	-1358	Numbl	0.295	5e-39	0.077	0.115	0.132	0.108	0.561	0.301	0.347
chr4	134975535	134975604	0		0		0		0	44591	Syf2	0.296	4e-14	0.304	0.336	0.278	0.372	0.57	0.625	0.662
chr5	36982106	36982216	0		1	Wfs1	0		0	6821	Wfs1	0.296	5e-25	0.553	0.525	0.435	0.542	0.748	0.878	0.802
chr15	100271606	100271680	1	LTR/ERVK/MMERVK9C_I-int	0		0		0	-9193	Tmprss12	0.297	4e-23	0.508	0.403	0.396	0.442	0.725	0.728	0.751
chr13	119662019	119662155	1	LTR/ERVK/IAPEY4_I-int	0		0		0	-17954	1700074H08Rik	0.297	2e-17	0.607	0.638	0.552	0.499	0.899	0.866	0.848
chr11	3945992	3946066	1	LTR/ERVK/MMERVK9C_I-int	0		0		0	-13951	Tcn2	0.297	7e-25	0.228	0.227	0.168	0.428	0.594	0.538	0.546
chr11	116354470	116354710	0		1	Rnf157	1	Rnf157	0	-19236	Foxj1	0.298	1e-34	0.272	0.322	0.32	0.28	0.625	0.566	0.602
chr4	139336852	139336994	0		0		0		0	15653	Mrto4	0.299	8e-23	0.245	0.298	0.258	0.31	0.538	0.638	0.555
chr10	61602676	61602702	0		0		1	Npffr1	0	7206	Npffr1	0.3	2e-05	0.376	0.292	0.398	0.284	0.645	0.628	0.643
chr13	65420360	65420488	0		0		0		1	141571	Zfp369	0.3	8e-33	0.041	0.031	0.046	0.022	0.325	0.36	0.319
chr11	101166398	101166546	0		1	Plekhh3	0		0	4830	Plekhh3	0.302	4e-08	0.169	0.412	0.292	0.238	0.751	0.527	0.463
chr4	141044924	141044998	0		0		1	Crocc	0	8700	Crocc	0.303	9e-12	0.142	0.141	0.188	0.119	0.467	0.431	0.456
chr8	89047271	89047382	0		0		0		0	-3164	Sall1	0.304	1e-37	0.029	0.02	0.022	0.035	0.296	0.341	0.357
chr7	115667179	115667252	0		0		1	Sox6	0	134393	Sox6	0.304	8e-10	0.227	0.386	0.409	0.444	0.558	0.739	0.712
chr4	43427486	43427601	0		1	Fam166b	0		0	1590	Fam166b	0.306	3e-32	0.137	0.205	0.176	0.127	0.474	0.462	0.469
chr17	32143385	32143673	0		1	Notch3	0		1	23323	Notch3	0.307	5e-14	0.137	0.149	0.137	0.165	0.427	0.476	0.449
chr2	31850259	31850335	0		0		0		0	-4292	Fibcd1	0.308	3e-33	0.408	0.356	0.383	0.535	0.556	0.816	0.809
chr9	4260436	4260786	0		0		0		1	48883	Aasdhppt	0.309	2e-22	0.487	0.57	0.545	0.553	0.84	0.847	0.856
chr11	98003063	98003287	0		1	Cacnb1	0		0	-7002	Arl5c	0.309	2e-37	0.195	0.196	0.184	0.219	0.515	0.497	0.508
chr2	155385905	155386089	0		1	Trp53inp2	0		0	4142	Trp53inp2	0.309	3e-34	0.493	0.481	0.405	0.482	0.766	0.815	0.741
chr2	168292341	168292431	0		0		0		0	-23055	Kcng1	0.309	5e-32	0.199	0.164	0.241	0.34	0.485	0.554	0.597
chr4	139430321	139430478	0		1	Ubr4	1	Ubr4	0	49742	Ubr4	0.31	2e-13	0.36	0.319	0.451	0.429	0.648	0.726	0.725
chr12	18387604	18388230	0		0		0		1	-126592	5730507C01Rik	0.31	1e-30	0.183	0.198	0.218	0.189	0.507	0.52	0.496
chr15	85507576	85507920	0		0		0		0	-4521	7530416G11Rik	0.31	1e-15	0.554	0.634	0.537	0.531	0.864	0.895	0.864
chr10	81812257	81812357	0		1	Gm10778	1	Gm10778	1	122	Gm10778	0.311	9e-15	0.082	0.155	0.13	0.136	0.417	0.454	0.442
chr15	79828054	79829189	0		1	Cbx6--Npcd	1	Npcd--Cbx6	1	5711	Npcd	0.311	9e-15	0.508	0.617	0.636	0.663	0.894	0.879	0.919
chr8	69902149	69902630	0		1	Tssk6--Ndufa13	0		1	176	Tssk6	0.312	1e-33	0.099	0.082	0.088	0.066	0.364	0.437	0.387
chr10	82048213	82048417	0		1	Zfp873	1	Zfp873	1	189	Zfp873	0.312	6e-41	0.017	0.022	0.021	0.027	0.316	0.356	0.326
chr4	154544062	154544170	0		0		1	Prdm16	0	92251	5930403L14Rik	0.313	7e-30	0.193	0.194	0.235	0.202	0.419	0.554	0.587
chr16	5007843	5007857	0		1	Smim22	1	Smim22	0	535	Smim22	0.314	0.0001	0.593	0.524	0.57	0.48	0.773	0.857	0.933
chr11	6007121	6007240	1	LTR/ERV1/RLTR4_MM-int	0		1	Camk2b	0	51423	Ykt6	0.315	9e-31	0.557	0.469	0.421	0.597	0.816	0.838	0.824
chr15	96507549	96507921	0		0		0		0	-46892	Scaf11	0.316	8e-13	0.385	0.538	0.451	0.392	0.717	0.82	0.736
chr10	127332390	127332650	0		1	Gli1	1	Gli1	0	8794	Arhgap9	0.317	6e-41	0.327	0.311	0.314	0.364	0.653	0.603	0.683
chr4	141041370	141041723	0		1	Crocc	1	Crocc	0	12115	Crocc	0.318	1e-22	0.51	0.524	0.563	0.545	0.849	0.891	0.818
chr4	139346151	139346495	0		0		0		1	6253	Mrto4	0.318	1e-36	0.546	0.552	0.559	0.509	0.877	0.834	0.868
chr11	117232264	117232743	0		0		1	Sept9	0	32844	Sept9	0.318	7e-39	0.335	0.377	0.379	0.374	0.639	0.715	0.701
chr8	4779239	4779437	0		1	Shcbp1	1	Shcbp1	1	196	Shcbp1	0.322	7e-28	0.044	0.05	0.058	0.051	0.364	0.43	0.328
chr9	44107744	44107934	0		1	Mfrp--C1qtnf5	0		0	531	C1qtnf5	0.324	9e-32	0.409	0.379	0.366	0.362	0.72	0.681	0.71
chr3	152557904	152557972	0		0		1	Ak5	0	-108974	AI115009	0.324	0.0002	0.156	0.279	0.232	0.163	0.676	0.42	0.502
chrX	75673248	75673770	0		0		0		0	91190	4933407K13Rik	0.325	2e-27	0.638	0.604	0.468	0.696	0.921	0.914	0.91
chr13	65562930	65563117	0		0		0		1	284171	Zfp369	0.326	5e-29	0.22	0.245	0.214	0.223	0.583	0.555	0.514
chr19	10426437	10426560	0		1	Syt7	1	Syt7	1	30949	Lrrc10b	0.327	1e-37	0.313	0.294	0.331	0.401	0.628	0.687	0.67
chr5	115438890	115439027	0		0		1	Msi1	0	9274	Msi1	0.328	4e-14	0.523	0.399	0.531	0.538	0.803	0.804	0.87
chr4	141053632	141054183	0		1	Crocc	1	Crocc	0	-247	Crocc	0.329	3e-16	0.303	0.453	0.335	0.4	0.705	0.667	0.726
chr19	61227912	61228635	0		1	Csf2ra	1	Csf2ra	1	144	Csf2ra	0.329	3e-32	0.469	0.473	0.499	0.434	0.769	0.819	0.807
chr8	120191186	120191447	0		0		0		0	-13847	Fam92b	0.33	2e-37	0.539	0.527	0.495	0.428	0.863	0.807	0.832
chr8	120549925	120550102	0		0		1	Gse1	0	11319	Mir7687	0.331	2e-08	0.354	0.206	0.21	0.264	0.62	0.567	0.578
chr3	95427911	95428178	0		0		1	Gm4349	1	696	Gm4349	0.331	2e-32	0.197	0.194	0.212	0.126	0.463	0.541	0.535
chr13	66247889	66247989	0		0		0		1	134487	Gm10324	0.333	3e-33	0.109	0.148	0.184	0.149	0.512	0.449	0.48
chr12	3235118	3235646	0		0		0		1	-408	Rab10os	0.335	1e-31	0.065	0.179	0.12	0.046	0.428	0.314	0.502
chr11	115427684	115427742	0		0		1	Kctd2	0	7588	Kctd2	0.337	2e-30	0.491	0.508	0.516	0.496	0.888	0.794	0.84
chr4	149049459	149049548	0		0		1	Pex14	0	50308	Pex14	0.337	2e-36	0.14	0.115	0.123	0.155	0.478	0.455	0.479
chr8	20424276	20424405	0		0		1	2610005L07Rik	1	474	2610005L07Rik	0.343	2e-40	0.055	0.047	0.031	0.034	0.409	0.429	0.317
chr9	58247082	58247339	0		1	Pml	0		1	2576	Pml	0.344	8e-41	0.128	0.102	0.117	0.122	0.452	0.518	0.413
chr7	65930672	65930751	0		0		1	Pcsk6	0	68577	Pcsk6	0.345	3e-33	0.405	0.396	0.368	0.511	0.681	0.8	0.814
chr11	120763447	120763680	0		0		0		0	20640	Rfng	0.348	1e-39	0.068	0.063	0.045	0.056	0.414	0.411	0.393
chr2	155386558	155386715	0		1	Trp53inp2	0		1	4781	Trp53inp2	0.348	1e-39	0.124	0.118	0.091	0.096	0.451	0.49	0.426
chr7	19053984	19054185	0		1	Sympk	0		0	-602	Rsph6a	0.35	1e-12	0.603	0.457	0.487	0.509	0.868	0.87	0.856
chr15	99818034	99818107	0		0		1	Lima1	0	2079	Lima1	0.354	2e-24	0.224	0.23	0.279	0.294	0.56	0.602	0.668
chr16	4718779	4719019	1	LTR/ERV1/RLTR41B	1	Nmral1	1	Nmral1	0	457	Nmral1	0.355	2e-33	0.108	0.178	0.083	0.169	0.558	0.416	0.467
chr4	154549987	154550077	0		0		1	Prdm16	0	86335	5930403L14Rik	0.356	8e-33	0.286	0.319	0.362	0.384	0.635	0.726	0.721
chr9	44505876	44506212	0		1	Bcl9l	0		0	6909	Bcl9l	0.358	4e-26	0.431	0.414	0.454	0.409	0.788	0.773	0.802
chr17	21231936	21232028	0		0		0		0	3157	Vmn1r234	0.36	6e-26	0.464	0.449	0.457	0.443	0.782	0.811	0.847
chr17	27706096	27706147	0		0		1	Pacsin1	0	20884	Pacsin1	0.364	6e-30	0.408	0.404	0.391	0.48	0.758	0.761	0.834
chr8	20550230	20550293	0		0		0		1	-64664	Gm21119	0.365	1e-39	0.04	0.057	0.059	0.065	0.386	0.474	0.399
chr7	13007123	13007937	0		1	Zbtb45	0		1	2270	Zbtb45	0.371	1e-22	0.306	0.225	0.291	0.284	0.577	0.604	0.659
chr3	88536188	88537007	0		1	Mex3a--Mir1905	0		1	-216	Mir1905	0.372	1e-17	0.124	0.103	0.148	0.149	0.351	0.498	0.514
chr14	52009329	52009545	0		1	Zfp219	0		1	5121	Zfp219	0.375	1e-39	0.381	0.379	0.385	0.359	0.739	0.751	0.764
chr16	77329508	77329580	0		1	Mir99ahg	0		0	217	Mir99ahg	0.378	8e-36	0.218	0.221	0.262	0.401	0.518	0.752	0.693
chr8	20550641	20550743	0		0		0		1	-64234	Gm21119	0.379	6e-38	0.17	0.13	0.196	0.165	0.566	0.556	0.509
chr11	98767343	98767391	0		0		0		0	8010	Nr1d1	0.38	1e-05	0.192	0.181	0.248	0.182	0.478	0.68	0.587
chr2	180659435	180659733	0		1	Dido1	0		0	-16893	Tcfl5	0.381	7e-36	0.209	0.247	0.227	0.233	0.547	0.673	0.61
chr5	111420827	111421173	0		1	Mn1	0		0	2835	Mn1	0.383	1e-32	0.275	0.234	0.259	0.279	0.606	0.673	0.657
chr13	65311354	65311746	0		0		0		0	32697	Zfp369	0.385	7e-39	0.449	0.3	0.357	0.341	0.652	0.717	0.663
chr17	28007813	28008093	0		1	Anks1	1	Anks1	0	72631	Tcp11	0.388	5e-39	0.331	0.348	0.34	0.348	0.736	0.735	0.715
chr4	147275519	147276093	0		0		1	Gm13152	1	99941	Gm13152	0.388	9e-26	0.204	0.214	0.227	0.191	0.557	0.596	0.643
chr8	19785077	19785175	0		0		1	Gm21119	1	55551	Gm21119	0.389	5e-34	0.102	0.091	0.117	0.162	0.492	0.566	0.462
chr8	120416314	120416488	0		0		0		0	-72464	Gse1	0.393	3e-25	0.352	0.302	0.344	0.354	0.67	0.738	0.784
chr19	8770987	8771249	0		1	Tmem223	0		1	123	Tmem223	0.393	6e-41	0.156	0.083	0.096	0.097	0.528	0.522	0.452
chr10	79735202	79735986	0		1	Hcn2	1	Bc1	1	10987	Polrmt	0.395	7e-27	0.34	0.306	0.322	0.3	0.727	0.72	0.683
chr17	17005019	17005080	0		0		0		0	-59052	Zfp960	0.4	3e-33	0.031	0.01	0.02	0.078	0.386	0.51	0.411
chr4	146067104	146067907	0		1	Gm13034	0		1	-17	Gm13034	0.402	3e-25	0.2	0.216	0.223	0.222	0.624	0.62	0.607
chr3	125403865	125404237	0		1	Ndst4	0		0	-39	Ndst4	0.402	6e-15	0.421	0.344	0.303	0.31	0.589	0.844	0.807
chr15	103314017	103314566	0		1	Zfp385a	0		1	-3854	Gpr84	0.404	2e-25	0.369	0.274	0.218	0.348	0.68	0.761	0.675
chr8	20296997	20297098	0		0		1	6820431F20Rik	1	384	6820431F20Rik	0.408	6e-41	0.137	0.142	0.143	0.155	0.547	0.572	0.555
chr4	88641065	88641138	0		0		0		0	3357	Ifna13	0.411	2e-29	0.218	0.209	0.253	0.316	0.639	0.727	0.612
chr17	29873875	29874749	0		0		1	Mdga1	0	13570	Mdga1	0.418	9e-24	0.237	0.281	0.302	0.277	0.663	0.67	0.786
chr5	99906022	99906510	0		0		0		1	72672	Hnrnpd	0.425	4e-33	0.044	0.072	0.074	0.095	0.429	0.576	0.573
chr4	145464214	145464414	0		1	Smarca5-ps	0		1	105	Smarca5-ps	0.425	2e-38	0.101	0.091	0.102	0.111	0.491	0.533	0.553
chr5	24482419	24483012	0		1	Agap3	1	Agap3	1	30540	Agap3	0.427	6e-32	0.49	0.47	0.459	0.433	0.882	0.879	0.897
chr4	126236972	126237093	0		1	Map7d1	1	Map7d1	1	19287	Map7d1	0.427	8e-41	0.305	0.31	0.329	0.264	0.764	0.716	0.708
chr6	148354614	148354880	0		1	Rps4l	1	Tmtc1	1	92	Rps4l	0.427	8e-41	0.075	0.063	0.085	0.075	0.541	0.536	0.425
chr4	147738536	147739047	0		0		0		1	-36161	Zfp534	0.427	9e-24	0.2	0.211	0.233	0.228	0.642	0.646	0.626
chr4	134160076	134160153	1	LTR/ERV1/RLTR4_MM-int	0		1	Cep85	0	26971	Cep85	0.432	7e-39	0.361	0.48	0.354	0.334	0.916	0.754	0.771
chr4	145640697	145641152	0		0		0		1	23779	Gm13212	0.432	5e-39	0.199	0.18	0.219	0.192	0.624	0.63	0.639
chr5	104860107	104860192	0		0		0		0	-82	Zfp951	0.436	3e-32	0.31	0.388	0.271	0.364	0.735	0.791	0.78
chr8	70868564	70868800	0		1	Ccdc124	1	Ccdc124	1	4808	Ccdc124	0.446	7e-25	0.096	0.084	0.08	0.092	0.567	0.557	0.527
chr10	80131994	80132304	0		1	Dos	1	Bc1--Dos	1	5238	Dos	0.447	5e-38	0.329	0.296	0.306	0.24	0.724	0.758	0.735
chr10	82083199	82083555	0		0		0		1	35251	Zfp873	0.452	2e-39	0.079	0.05	0.061	0.056	0.467	0.551	0.524
chr9	22188454	22188552	0		0		1	Zfp872--Mir680-2	0	338	Zfp872	0.469	8e-36	0.092	0.199	0.16	0.168	0.724	0.52	0.628
chr4	146941831	146942618	0		0		0		1	-79625	Rex2	0.47	2e-21	0.457	0.363	0.391	0.397	0.851	0.869	0.894
chr5	30232135	30232326	0		0		0		0	-387	Ept1	0.486	2e-28	0.123	0.254	0.303	0.144	0.777	0.664	0.634
chr19	61225285	61227262	0		1	Csf2ra	1	Csf2ra	1	2144	Csf2ra	0.51	1e-21	0.072	0.079	0.086	0.078	0.627	0.529	0.593
chr8	119896132	119896209	1	LTR/ERV1/RLTR4_MM-int	0		0		0	-14681	Usp10	0.544	1e-39	0.051	0.065	0.054	0.07	0.762	0.473	0.578
chr5	28168581	28169142	0		0		1	En2	0	3167	En2	0.597	6e-41	0.014	0.013	0.011	0.016	0.616	0.606	0.638
chr11	101140228	101140642	0		0		0		0	-15448	Tubg2	0.703	4e-40	0.054	0.052	0.03	0.028	0.801	0.605	0.825
chr5	109556788	109556851	0		0		1	Crlf2	1	2173	Crlf2	0.733	2e-29	0.181	0.163	0.175	0.256	0.905	0.957	0.918
