# Supplementary material for: EHMT2 directs DNA methylation for efficient gene silencing in mouse embryos
Source: HighWire-hosted journal article supplement (doi:10.1101/gr.198291.115), 2015-11-17
Supplement: SuppTable_S2.xlsx [file SuppTable_S2.xlsx]

## Sheet: DESeq_results_WTvsG9aKO
gene.id	chromosome	log2 (FoldChange Ehmt2KO/WT)	adjusted p-value	NrmCnts_WT#1	NrmCnts_WT#2	NrmCnts_Ehmt2KO#1	NrmCnts_Ehmt2KO#2	fpkm_WT#1	fpkm_WT#2	fpkm_Ehmt2KO#1	fpkm_Ehmt2KO#2
Cyct	chr2	8.06015	1.68799e-71	1.703	4.607	1739.11	1210.57	0.0813	0.21985	83	57.7748
Naa11	chr5	7.71214	1.29958e-36	0.852	0	665.614	458.293	0.00795	0	6.21359	4.27823
Magea10	chrX	7.68721	3.3691e-32	0	0	457.189	414.7	0	0	7.88429	7.15155
Tktl2	chr8	7.58173	5.41166e-31	0	0	397.8	406.875	0	0	1.93799	1.9822
Magea4	chrX	6.72922	3.80422e-25	0.852	0	270.056	264.916	0.02821	0	8.94584	8.77559
Pdha2	chr3	6.67812	3.48678e-21	0	0	174.808	271.623	0	0	2.33399	3.62665
Magea8	chrX	6.58277	3.27894e-20	0	0	272.297	156.49	0	0	5.19504	2.98562
Cd3e	chr9	6.36632	5.03331e-31	1.703	2.764	443.743	301.803	0.03725	0.06044	9.70405	6.60002
Ptprtos	chr2	6.26509	6.87297e-23	1.703	0	247.644	215.733	0.08477	0	12.3247	10.7365
Sohlh2	chr3	5.91362	4.06025e-15	0	0	146.794	110.661	0	0	1.9633	1.48004
Gm773	chrX	5.88299	6.34227e-15	0	0	107.574	145.313	0	0	3.55225	4.79843
Myh3	chr11	5.79482	3.88912e-26	2.555	2.764	249.885	289.507	0.01339	0.01449	1.30962	1.51727
Btla	chr16	5.56666	4.63947e-23	18.737	28.561	1253.91	2556.38	0.18189	0.27725	12.1722	24.8158
Ptpn20	chr14	5.47532	8.30386e-17	2.555	0	151.276	167.668	0.02597	0	1.5374	1.704
Nxf3	chrX	5.35868	1.17071e-142	55.36	35.932	1967.71	2034.38	0.58378	0.3789	20.7497	21.4527
Nlrp4c	chr7	5.30048	3.34893e-12	0.852	0	72.837	159.844	0.0074	0	0.6329	1.38894
Asz1	chr6	5.29508	2.53113e-12	11.072	1.843	895.329	896.467	0.19983	0.03326	16.1588	16.1794
4933427D06Rik	chr6	5.27541	1.39501e-15	3.407	0	209.545	127.428	0.04082	0	2.51065	1.52677
Pramef25	chr4	5.25039	1.55328e-10	0	0	44.822	173.257	0	0	0.67639	2.61454
Ccdc108	chr1	5.13078	8.43852e-14	1.703	2.764	89.645	311.863	0.00936	0.01518	0.49233	1.71276
Magea5	chrX	5.11599	3.6189e-11	0	0.921	136.709	67.067	0	0.01851	2.74671	1.3475
Abca16	chr7	5.11473	2.47578e-12	1.703	0	142.311	87.188	0.01021	0	0.85287	0.52252
4933425L06Rik	chr13	5.03236	1.09746e-09	0	0	108.695	50.301	0	0	1.58246	0.73232
Gm13119	chr4	5.0273	1.32076e-09	0	0	45.943	120.721	0	0	0.69632	1.82966
Gm12794	chr4	5.00755	2.74475e-09	0	0	33.617	167.668	0	0	0.72705	3.62628
Rhox7a	chrX	4.9656	5.92923e-15	5.11	0	186.013	147.548	0.16325	0	5.94247	4.71364
Enkur	chr2	4.84428	1.94794e-10	1.703	0	67.234	134.135	0.04461	0	1.76094	3.51316
BC080695	chr4	4.6863	3.68326e-08	0.852	0	24.652	212.38	0.01272	0	0.36813	3.1714
Rhbg	chr3	4.5368	2.47014e-07	0	0	25.773	115.132	0	0	0.4233	1.89097
Plekhd1	chr12	4.43834	7.344e-13	3.407	3.685	113.177	152.019	0.03033	0.03281	1.00769	1.35354
2410012E07Rik	chr14	4.40321	8.6108e-10	0.852	2.764	90.766	90.541	0.01971	0.06396	2.10048	2.09528
Tcstv3	chr13	4.36134	1.33313e-06	0	0	16.808	134.135	0	0	0.60119	4.79759
Magea3	chrX	4.31712	2.71039e-07	0	0.921	59.39	54.772	0	0.02614	1.68477	1.55376
Slc9b1	chr3	4.28436	4.53274e-24	11.924	13.82	351.857	262.68	0.16679	0.19331	4.92182	3.67441
Tcstv1	chr13	4.26587	2.24278e-06	0	0	23.532	88.305	0	0	0.84358	3.16562
Tmem92	chr11	4.25487	1.96098e-06	0	0	36.979	54.772	0	0	0.53098	0.78647
Pou5f1	chr17	4.24546	2.67021e-36	60.47	59.886	820.252	1760.52	1.31599	1.30327	17.8508	38.3134
1700019E08Rik	chr2	4.23752	2.37675e-06	0	0	63.872	31.298	0	0	3.15874	1.54782
Zscan4f	chr7	4.22666	3.43473e-06	0	0	17.929	107.308	0	0	0.30784	1.84244
Chrna9	chr5	4.2214	2.52085e-06	0	0	36.979	52.536	0	0	0.57976	0.82367
1700008I05Rik	chrX	4.09105	6.16196e-12	4.258	5.528	123.262	133.017	0.0753	0.09775	2.17953	2.35202
Aoah	chr13	4.07864	1.73453e-07	0	3.685	64.993	99.483	0	0.03627	0.63961	0.97904
1700091H14Rik	chr14	4.06978	1.18857e-06	1.703	0	44.822	76.01	0.03854	0	1.0141	1.71971
Zscan4d	chr7	4.05361	2.38223e-06	1.703	0.921	22.411	167.668	0.02685	0.01452	0.35331	2.64325
Pet2	chrX	3.98836	1.57329e-05	0	0	28.014	52.536	0	0	0.21036	0.3945
Trp73	chr4	3.95092	2.41343e-06	2.555	0	40.34	100.601	0.01507	0	0.23786	0.59317
Hormad2	chr11	3.85578	9.59505e-08	5.11	1.843	63.872	134.135	0.11949	0.04309	1.49352	3.13647
Gm6792	chr7	3.84504	2.7538e-05	0.852	0	19.05	91.659	0.02876	0	0.64325	3.09505
4930500J02Rik	chr2	3.8197	9.69372e-33	76.653	35.01	844.904	900.938	2.10231	0.96021	23.1728	24.7096
Mroh2b	chr15	3.81445	3.39313e-06	0	3.685	51.546	92.776	0	0.02213	0.30951	0.55707
Magea2	chrX	3.81181	5.06651e-05	0.852	0	146.794	8.942	0.01587	0	2.7358	0.16666
Sh3gl3	chr7	3.80723	1.36705e-28	28.958	36.853	417.97	611.431	0.57738	0.7348	8.33375	12.1911
Lincenc1	chr13	3.79405	3.50162e-22	21.292	16.584	329.445	281.683	0.18867	0.14695	2.91921	2.49599
Tph2	chr10	3.77759	6.40054e-05	0	0	26.893	42.476	0	0	0.32161	0.50795
Slc12a3	chr8	3.76586	2.1444e-06	1.703	1.843	53.787	65.95	0.01621	0.01754	0.512	0.62778
C920009B18Rik	chr10	3.76517	4.16861e-15	13.627	9.213	190.496	201.202	0.09478	0.06408	1.32496	1.39943
Gm4841	chr18	3.75363	3.82021e-17	12.775	14.741	242.041	207.909	0.14136	0.16312	2.67827	2.30058
D630023F18Rik	chr1	3.74723	1.96607e-10	10.22	4.607	171.446	117.368	0.12034	0.05424	2.01874	1.38198
Gm595	chrX	3.7385	2.11254e-06	0	5.528	79.56	88.305	0	0.08181	1.1774	1.30683
Spata18	chr5	3.68806	8.38403e-05	0.852	0	15.688	88.305	0.01372	0	0.25277	1.42282
Dnajb13	chr7	3.67614	1.44317e-05	1.703	0.921	64.993	39.123	0.0468	0.02531	1.78564	1.07487
AF067061	chr13	3.64823	9.2624e-05	0	0.921	20.17	70.421	0	0.03284	0.71897	2.51016
Clca3	chr3	3.63908	2.46312e-05	2.555	0	44.822	61.478	0.02734	0	0.47958	0.6578
D1Pas1	chr1	3.61352	1.75542e-05	0	3.685	54.908	68.185	0	0.03603	0.53683	0.66664
Nodal	chr10	3.59754	6.27178e-07	8.517	0.921	101.971	105.072	0.12773	0.01382	1.52925	1.57575
Ptprq	chr10	3.55354	1.02227e-05	5.962	0	86.283	73.774	0.02653	0	0.3839	0.32825
Xlr5a	chrX	3.53849	1.63895e-10	23.847	6.449	191.616	280.565	0.45387	0.12274	3.64691	5.33981
Dnmt3l	chr10	3.52237	1.86976e-08	7.665	4.607	101.971	107.308	0.09016	0.05418	1.19934	1.26211
Cyp2b23	chr7	3.49992	3.39892e-05	2.555	0.921	40.34	64.832	0.03677	0.01326	0.58058	0.93306
4430402I18Rik	chr19	3.48988	0.000386849	0	0	14.567	52.536	0	0	0.21258	0.76664
B020031M17Rik	chr13	3.47612	0.000392727	0	0	32.496	24.591	0	0	1.10324	0.83487
Gm8267	chr14	3.464	7.14806e-06	2.555	3.685	86.283	49.183	0.06471	0.09333	2.18515	1.24557
M1ap	chr6	3.45549	2.41827e-18	21.292	22.112	249.885	295.096	0.32601	0.33856	3.82606	4.51829
Utf1	chr7	3.43803	1.83209e-12	25.551	16.584	187.134	376.695	0.69171	0.44895	5.06607	10.1978
Gm5622	chr14	3.42843	8.35991e-12	12.775	11.056	163.602	157.608	0.25376	0.2196	3.24963	3.13057
Rpl10l	chr12	3.42816	0.000600661	0	4.607	442.622	354.339	0	0.14141	13.5873	10.8773
Lrrc10b	chr19	3.40797	3.15573e-05	6.814	1.843	36.979	164.315	0.10302	0.02786	0.5591	2.48437
1700013H16Rik	chrX	3.4073	7.04316e-10	13.627	10.135	118.78	213.498	0.34962	0.26002	3.04745	5.47757
Fam183b	chr11	3.38331	2.01792e-07	7.665	4.607	85.163	107.308	0.42832	0.25741	4.75871	5.99613
Ccdc146	chr5	3.36102	6.75448e-06	11.072	0.921	119.9	99.483	0.1026	0.00854	1.11103	0.92184
Dnah5	chr15	3.35706	2.07547e-10	11.072	11.977	128.865	172.14	0.02227	0.02409	0.25914	0.34617
1700028P14Rik	chr19	3.34701	0.000521986	0.852	0	28.014	35.769	0.03081	0	1.01352	1.2941
Toporsl	chr4	3.32443	0.000146128	0	4.607	73.957	46.947	0	0.06025	0.96731	0.61404
Gm20767	chr13	3.32227	7.63777e-07	7.665	9.213	68.354	187.789	0.16869	0.20275	1.50424	4.13258
Spata31d1a	chr13	3.31589	0.000368596	0.852	0.921	42.581	29.063	0.00625	0.00676	0.31265	0.21339
Psma8	chr18	3.31191	2.96192e-10	9.369	14.741	143.432	158.726	0.17378	0.27343	2.66051	2.9442
Daw1	chr1	3.25793	0.00088218	0	0.921	21.291	42.476	0	0.01735	0.40084	0.79969
Hydin	chr8	3.24707	7.86294e-13	17.034	17.505	182.652	204.555	0.03389	0.03483	0.36342	0.407
Xlr4b	chrX	3.2469	2.71184e-08	28.106	6.449	193.857	245.914	0.66865	0.15343	4.61195	5.85039
Rnase1	chr14	3.23841	8.47721e-07	7.665	5.528	78.439	105.072	0.24816	0.17896	2.53944	3.40167
Wnt8a	chr18	3.22868	1.10974e-25	43.436	52.515	432.537	535.421	0.89799	1.08569	8.94215	11.0691
Stat4	chr1	3.22636	9.97907e-06	4.258	4.607	62.751	74.892	0.04486	0.04853	0.66106	0.78895
Slc38a8	chr8	3.22622	6.06613e-05	1.703	6.449	45.943	101.719	0.0204	0.07724	0.55025	1.21827
Xlr	chrX	3.22516	1.49874e-06	7.665	4.607	84.042	88.305	0.10261	0.06166	1.12498	1.18205
Gm10451	chr12	3.22147	2.21413e-08	19.589	6.449	152.396	169.904	0.68887	0.2268	5.3592	5.97487
Pilrb2	chr5	3.19602	0.00090679	0.852	0.921	17.929	55.889	0.0148	0.01601	0.31158	0.97129
Btnl9	chr11	3.15745	0.000110982	4.258	1.843	59.39	49.183	0.0543	0.02349	0.75722	0.62708
Otof	chr5	3.15061	1.80657e-05	3.407	7.371	96.368	59.243	0.01492	0.03228	0.42208	0.25947
Drc1	chr5	3.12835	6.20347e-06	5.962	8.292	62.751	125.192	0.08262	0.11491	0.86964	1.73498
Aurkc	chr7	3.11514	0.000335842	1.703	2.764	39.22	49.183	0.0372	0.06036	0.85649	1.07406
4930503E14Rik	chr14	3.11429	8.55472e-05	4.258	2.764	53.787	58.125	0.10375	0.06734	1.31039	1.41608
Vrtn	chr12	3.09854	2.39477e-05	71.542	106.873	635.359	1778.4	0.62269	0.93021	5.53005	15.4789
Armc3	chr2	3.04925	0.00144463	0	2.764	32.496	44.712	0	0.02878	0.33836	0.46555
Khdc1a	chr1	3.04472	0.000467684	2.555	2.764	31.376	64.832	0.04115	0.04451	0.50528	1.04407
C8b	chr4	3.04298	0.00204104	1.703	0	22.411	43.594	0.02389	0	0.31433	0.61143
Gmnc	chr16	3.02912	0.0020831	0.852	0.921	45.943	17.885	0.00565	0.00611	0.30477	0.11864
Lrriq4	chr3	3.02059	0.00353679	0	0	25.773	17.885	0	0	0.29303	0.20334
Calb2	chr8	3.01952	0.000237007	1.703	7.371	89.645	46.947	0.03738	0.16175	1.96726	1.03026
Zfp36l3	chrX	3.01259	1.46875e-09	22.144	12.899	163.602	177.728	0.26613	0.15502	1.96619	2.13596
Usp17le	chr7	3.00732	0.00373736	0	0	16.808	26.827	0	0	0.28002	0.44693
1700026D08Rik	chr7	2.98207	0.00322899	0	1.843	11.206	70.421	0	0.04472	0.27194	1.709
4922502N22Rik	chr6	2.97081	0.00443743	0	0	41.461	8.942	0	0	1.13317	0.2444
Xlr3b	chrX	2.96897	1.30328e-08	12.775	18.426	132.226	165.433	0.24811	0.35786	2.56794	3.21283
Ccdc172	chr19	2.96281	0.000731092	1.703	3.685	36.979	52.536	0.04926	0.10657	1.06929	1.51916
A630023A22Rik	chr14	2.94954	0.00477165	0	0	19.05	22.356	0	0	0.44844	0.52627
Xlr4a	chrX	2.91726	4.73109e-06	33.216	6.449	175.928	230.265	0.87582	0.17005	4.63874	6.07144
Pifo	chr3	2.91667	7.6574e-07	22.996	9.213	122.141	192.26	0.64077	0.25672	3.40342	5.35723
Ankrd66	chr17	2.91275	0.00337458	0.852	0.921	30.255	24.591	0.02025	0.0219	0.71924	0.5846
Lrtm2	chr6	2.91008	0.00465331	0.852	0	20.17	29.063	0.00727	0	0.17217	0.24807
Zscan4b	chr7	2.90736	0.00596814	0	0	50.425	363.281	0	0	0.90281	6.50414
Mup6	chr4	2.89872	0.00491122	0.852	0	30.255	19.002	0.04953	0	1.75947	1.10507
Gm5771	chr6	2.886	0.00619831	0	0	11.206	32.416	0	0	0.42706	1.2354
Rhox2a	chrX	2.88552	0.00619831	0	0	12.326	30.18	0	0	0.49436	1.21043
Wdr63	chr3	2.87975	0.00528313	0	0.921	19.05	30.18	0	0.00939	0.1941	0.30752
Cml5	chr6	2.87767	0.005365	0.852	0	20.17	27.945	0.02713	0	0.6424	0.89002
Gm13078	chr4	2.85664	0.00651648	0.852	0	5.603	63.714	0.01268	0	0.08339	0.94826
Xlr5b	chrX	2.85141	1.75478e-05	16.182	5.528	95.248	121.839	0.44813	0.15308	2.63766	3.37403
Pim2	chrX	2.84033	1.49228e-60	350.898	330.755	2160.44	2824.65	5.39901	5.08908	33.2412	43.4609
Car3	chr3	2.83697	6.33564e-21	199.297	135.434	927.826	1618.56	4.09325	2.78162	19.0561	33.2428
Xlr5c	chrX	2.83666	0.00762472	0	0	8.964	35.769	0	0	0.52133	2.08014
Xlr4c	chrX	2.83417	0.00182904	10.22	0	63.872	93.894	0.26243	0	1.64006	2.41095
Foxj1	chr11	2.83381	0.000142899	9.369	20.269	57.149	262.68	0.11412	0.2469	0.69614	3.19979
Slc22a8	chr19	2.82965	0.00114448	3.407	2.764	39.22	46.947	0.03048	0.02473	0.35089	0.42003
Odf3b	chr15	2.82549	0.00443025	0.852	1.843	16.808	48.065	0.02572	0.05564	0.50754	1.45135
Ddx4	chr13	2.82514	1.60057e-05	6.814	12.899	82.922	106.19	0.0751	0.14218	0.91401	1.17049
Igbp1b	chr6	2.81885	0.00813965	0	0	10.085	32.416	0	0	0.23408	0.75238
Vwa3a	chr7	2.81386	5.93078e-05	8.517	6.449	86.283	64.832	0.05847	0.04428	0.59239	0.44511
Slc47a2	chr11	2.80867	0.00597225	1.703	0	26.893	27.945	0.0225	0	0.3553	0.36919
Ackr4	chr9	2.80439	0.00253905	1.703	2.764	30.255	42.476	0.02536	0.04116	0.4505	0.63247
Gal	chr19	2.79954	0.000705677	10.22	8.292	31.376	190.024	0.45916	0.37252	1.40959	8.53705
4930502E18Rik	chrX	2.7987	0.00480217	1.703	0.921	20.17	40.24	0.04447	0.02405	0.52653	1.05044
Trh	chr6	2.78505	6.57879e-05	153.305	163.995	824.734	2251.23	3.47854	3.72111	18.7135	51.081
Tsga8	chrX	2.76551	0.00995776	0	0	13.447	24.591	0	0	0.39391	0.72038
Dppa4	chr16	2.76241	0.0100655	0	0	16.808	20.12	0	0	0.34409	0.41189
Dynlrb2	chr8	2.73677	0.000383659	6.814	9.213	43.702	120.721	0.41547	0.5618	2.66483	7.36127
Lancl3	chrX	2.73564	0.000114241	5.11	11.977	76.198	84.952	0.04094	0.09595	0.61043	0.68056
5031410I06Rik	chr5	2.71711	0.0110072	0	0.921	8.964	43.594	0	0.00982	0.09553	0.46454
LOC101056136	chr14	2.71134	0.00408314	2.555	1.843	32.496	34.651	0.05819	0.04196	0.74002	0.7891
Mroh6	chr15	2.68591	0.0133403	0	0	28.014	10.06	0	0	0.26089	0.09369
2610037D02Rik	chr15	2.6793	1.16718e-06	24.699	12.899	164.723	128.546	0.21362	0.11156	1.42463	1.11175
Cfap44	chr16	2.67728	6.30102e-07	28.106	22.112	125.503	260.445	0.13408	0.10548	0.5987	1.24242
4930526L06Rik	chr19	2.67102	0.00282328	4.258	2.764	31.376	54.772	0.13111	0.0851	0.96598	1.68629
Cyp2a5	chr7	2.65832	0.0135168	0.852	0	32.496	12.296	0.0156	0	0.59504	0.22515
Xlr3c	chrX	2.6493	0.0137083	0.852	0	22.411	19.002	0.01689	0	0.44431	0.37673
Tekt4	chr17	2.64856	0.0151659	0	0	6.723	34.651	0	0	0.13782	0.7103
2410012M07Rik	chr9	2.6364	0.0101414	3.407	0	43.702	24.591	0.05898	0	0.75655	0.42572
Ano5	chr7	2.61589	0.00128266	3.407	11.056	49.305	90.541	0.01368	0.04441	0.19805	0.36369
Acsbg1	chr9	2.61502	0.000391267	10.22	5.528	62.751	76.01	0.11566	0.06256	0.71013	0.86017
Aqp9	chr9	2.60553	0.0175743	0	0	14.567	19.002	0	0	0.14695	0.19169
Nckap1l	chr15	2.59057	1.18605e-06	16.182	19.348	126.624	127.428	0.10773	0.12881	0.84299	0.84835
4930461G14Rik	chr9	2.57079	0.00313047	11.072	1.843	48.184	84.952	0.44577	0.07419	1.93993	3.42023
Celf6	chr9	2.56849	0.0185906	0.852	0	25.773	14.531	0.00967	0	0.29272	0.16504
Fgf5	chr5	2.56278	3.64034e-10	69.839	35.01	314.878	371.106	0.87587	0.43907	3.94897	4.65414
Mfap5	chr6	2.55814	0.00651093	2.555	3.685	25.773	49.183	0.05691	0.08208	0.57401	1.09539
Rhox2d	chrX	2.55577	0.0207429	0	0	14.567	17.885	0	0	0.57542	0.70646
Syt4	chr18	2.54825	0.00250462	10.22	3.685	39.22	93.894	0.08227	0.02967	0.31572	0.75586
AI662270	chr11	2.53999	3.03201e-05	57.915	12.899	283.502	231.382	1.29171	0.28768	6.3231	5.16064
2900011O08Rik	chr16	2.51534	0.000323209	39.178	16.584	86.283	342.043	0.52243	0.22114	1.15057	4.56107
Zfp42	chr8	2.51146	0.0113573	1.703	2.764	31.376	27.945	0.0297	0.04819	0.54709	0.48726
C430002E04Rik	chr3	2.51017	4.6743e-08	51.953	24.876	238.68	257.091	0.75254	0.36032	3.45727	3.72396
Adgb	chr10	2.51001	0.000400401	9.369	17.505	62.751	144.195	0.05638	0.10535	0.37766	0.8678
Krt27	chr11	2.50613	0.0241637	0	0	15.688	15.649	0	0	0.32011	0.31932
Efcab10	chr12	2.50406	7.9318e-05	11.924	22.112	86.283	157.608	0.55473	1.02872	4.0142	7.33249
4921509O07Rik	chr13	2.5038	0.0243305	0	0	16.808	14.531	0	0	0.20563	0.17777
Atp2b2	chr6	2.50239	0.00114939	7.665	16.584	50.425	147.548	0.03335	0.07215	0.21939	0.64194
Capsl	chr15	2.49619	3.78703e-07	23.847	37.774	156.879	241.442	0.79164	1.25395	5.20774	8.01491
Cftr	chr6	2.49524	6.34336e-09	32.364	33.168	230.836	179.964	0.16122	0.16522	1.14991	0.89649
Morn5	chr2	2.49404	0.018251	0	3.685	23.532	41.358	0	0.16773	1.07098	1.8823
AA792892	chr5	2.494	0.00375431	13.627	12.899	26.893	217.969	0.35308	0.33421	0.69682	5.64765
1700003M02Rik	chr4	2.49395	0.00366346	8.517	2.764	45.943	59.243	0.15586	0.05058	0.84077	1.08416
1700020N15Rik	chrX	2.49365	0.0238692	0	0.921	13.447	25.709	0	0.05299	0.77339	1.47867
Pramel1	chr4	2.48827	0.0256456	0	0	22.411	10.06	0	0	0.28844	0.12948
Gm13083	chr4	2.48632	0.0204804	1.703	1.843	6.723	63.714	0.02171	0.02348	0.08569	0.81203
Iqca	chr1	2.48374	0.0260014	0	0	19.05	12.296	0	0	0.18636	0.12029
Rlbp1	chr7	2.47668	0.000855819	5.962	11.977	66.113	72.656	0.08499	0.17073	0.94243	1.0357
9430018G01Rik	chr6	2.4756	0.000727142	5.962	13.82	71.716	79.363	0.04572	0.10598	0.54997	0.60861
Gm8994	chr6	2.47183	0.0015151	7.665	6.449	51.546	62.596	0.15303	0.12875	1.02906	1.24967
Ceacam20	chr7	2.47158	0.00549488	4.258	4.607	32.496	52.536	0.04619	0.04997	0.3525	0.56988
Cer1	chr4	2.44927	0.00265702	213.775	180.579	757.5	2471.43	3.85377	3.25534	13.6556	44.553
Drc7	chr8	2.44731	0.0202008	4.258	0	28.014	39.123	0.04722	0	0.31064	0.43382
Gm973	chr1	2.43938	0.0214176	1.703	2.764	8.964	62.596	0.01488	0.02414	0.07831	0.5468
Dnah9	chr11	2.42363	0.00366337	7.665	8.292	33.617	98.365	0.01748	0.0189	0.07664	0.22426
Kndc1	chr7	2.41973	0.00477165	11.924	7.371	30.255	134.135	0.05128	0.0317	0.13012	0.57687
4930467D21Rik	chr5	2.4153	0.0318788	0	0	22.411	8.942	0	0	0.23499	0.09376
Rsph4a	chr10	2.4135	0.00328304	12.775	12.899	34.737	171.022	0.10992	0.11097	0.29887	1.47141
Spag17	chr3	2.41237	0.00261682	6.814	9.213	41.461	83.834	0.02722	0.0368	0.16561	0.33486
Slc27a2	chr2	2.40407	0.000540181	13.627	9.213	66.113	92.776	0.18598	0.12574	0.90229	1.26619
Cfap52	chr11	2.39227	0.000571056	7.665	23.954	95.248	120.721	0.10937	0.34178	1.35897	1.72242
Gm16390	chrX	2.36512	0.0370089	0	0	31.376	4.471	0	0	0.91147	0.12989
Cfc1	chr1	2.35935	5.41494e-08	82.614	57.122	263.332	529.832	2.49939	1.72815	7.96678	16.0294
Akr1c12	chr13	2.34853	0.00195402	19.589	5.528	100.851	76.01	0.49972	0.14102	2.57275	1.93904
1110017D15Rik	chr4	2.34624	0.0233981	5.11	0.921	20.17	51.418	0.1244	0.02243	0.49102	1.25171
Iqub	chr6	2.34197	0.0183978	6.814	0.921	38.099	41.358	0.05861	0.00792	0.3277	0.35573
Gtf2a1l	chr17	2.34191	0.0271302	3.407	0.921	17.929	39.123	0.06608	0.01787	0.34776	0.75885
Pmaip1	chr18	2.32139	1.26477e-26	162.674	163.995	768.706	906.527	1.92483	1.94047	9.09569	10.7264
Aqp8	chr7	2.31672	0.000861806	35.771	9.213	177.049	112.897	0.75595	0.1947	3.74154	2.38583
Cd200r3	chr16	2.3145	NA	0	0	16.808	11.178	0	0	0.23917	0.15905
Ace	chr11	2.30581	0.00260063	7.665	10.135	53.787	67.067	0.04553	0.0602	0.31948	0.39836
Prr23a	chr9	2.29779	0.0449534	0	0	17.929	10.06	0	0	0.53166	0.29832
1700080O16Rik	chrX	2.29692	0.0449597	0	0	23.532	6.707	0	0	0.50824	0.14485
Mat1a	chr14	2.2965	0.0423591	0	1.843	25.773	15.649	0	0.0166	0.23217	0.14097
Zscan4a	chr7	2.296	0.0437253	0	0	28.014	297.332	0	0	0.38978	4.13701
Zscan4c	chr7	2.29098	0.0445365	0	0	20.17	210.144	0	0	0.2783	2.89949
Cyp2d26	chr15	2.28454	0.0123401	13.627	1.843	62.751	61.478	0.26014	0.03518	1.19794	1.17363
Acan	chr7	2.28403	0.00325846	7.665	11.977	48.184	83.834	0.03273	0.05114	0.20573	0.35794
Tmem238	chr7	2.28099	0.00138779	12.775	11.056	58.269	92.776	0.38172	0.33034	1.74106	2.77212
Vsx1	chr2	2.26708	0.027211	0.852	7.371	28.014	53.654	0.0075	0.06487	0.24656	0.47223
Slc6a13	chr6	2.2658	0.0151523	13.627	6.449	22.411	139.724	0.19904	0.0942	0.32734	2.04083
Aim2	chr1	2.25	5.74794e-29	287.873	285.61	1588.96	1198.27	3.56333	3.53532	19.6684	14.8324
Foxn4	chr5	2.24666	0.040088	0	5.528	28.014	41.358	0	0.05845	0.29621	0.4373
Spint5	chr2	2.24662	0.0511929	0	0	5.603	24.591	0	0	0.39717	1.74323
Kank4os	chr4	2.23975	2.31168e-05	20.441	28.561	126.624	138.606	0.2688	0.37559	1.66516	1.82273
Ak7	chr12	2.23781	0.0232636	1.703	8.292	30.255	55.889	0.01729	0.08419	0.30718	0.56745
Rec114	chr9	2.23655	3.02663e-06	25.551	37.774	166.964	166.551	0.9087	1.34342	5.93797	5.92327
Casp4	chr9	2.23432	0.0469436	3.407	0	16.808	36.887	0.07471	0	0.3686	0.80892
Car1	chr3	2.23393	0.0331672	5.11	2.764	12.326	68.185	0.12859	0.06955	0.31016	1.71574
Gm572	chr4	2.23312	0.0414088	7.665	0	21.291	72.656	0.1738	0	0.48274	1.6474
Slc7a3	chrX	2.23297	1.33251e-15	119.237	116.087	488.565	662.849	1.54986	1.5089	6.35041	8.61577
Otog	chr7	2.23093	0.00606924	8.517	8.292	70.595	41.358	0.02663	0.02593	0.22074	0.12932
BC147527	chr13	2.23068	0.0530173	1.703	0	6.723	39.123	0.03228	0	0.12742	0.74145
Armc4	chr18	2.22682	0.0304177	2.555	6.449	15.688	69.303	0.02308	0.05825	0.14169	0.62593
Serpina5	chr12	2.22448	0.0540443	0	0	4.482	26.827	0	0	0.06511	0.38967
Arhgap20os	chr9	2.22338	NA	0	0	8.964	17.885	0	0	0.1897	0.37846
Xlr3a	chrX	2.22321	0.00092831	57.064	11.977	212.907	190.024	1.08803	0.22837	4.0595	3.62319
Avpr1b	chr1	2.22026	0.000259053	22.996	32.246	94.127	213.498	0.17409	0.24413	0.71261	1.61633
9830166K06Rik	chr19	2.21808	0.0542435	0	2.764	5.603	55.889	0	0.03162	0.0641	0.63939
Abcc12	chr8	2.21295	0.0356802	2.555	2.764	34.737	19.002	0.01779	0.01924	0.24183	0.13229
Cass4	chr2	2.2091	0.0200057	7.665	2.764	33.617	48.065	0.06487	0.02339	0.28447	0.40674
Gm11544	chr11	2.2052	0.0567276	0	0	5.603	23.474	0	0	0.12966	0.54322
Bhmt	chr13	2.20039	0.0384861	3.407	1.843	19.05	34.651	0.05166	0.02794	0.28886	0.52543
Lect2	chr13	2.19623	0.0071689	19.589	4.607	86.283	70.421	0.70144	0.16495	3.08961	2.52161
Slpi	chr2	2.19426	0.0326536	0.852	8.292	36.979	44.712	0.03053	0.29725	1.32563	1.60285
Gm5039	chr12	2.19376	0.0593199	0	0.921	10.085	22.356	0	0.01763	0.193	0.42782
Gm4371	chr15	2.18567	0.0596123	18.737	0.921	208.425	207.909	0.36547	0.01797	4.06536	4.0553
Trim61	chr8	2.18375	0.0177538	6.814	4.607	51.546	31.298	0.09599	0.0649	0.72621	0.44094
Lrrc48	chr11	2.18228	0.00107254	14.479	13.82	73.957	84.952	0.24472	0.23358	1.25	1.43583
Anxa8	chr14	2.18123	0.0344226	2.555	3.685	25.773	30.18	0.0427	0.06159	0.43074	0.5044
Lrriq1	chr10	2.18038	0.0012452	14.479	12.899	73.957	80.481	0.0859	0.07653	0.43879	0.47749
Spef2	chr15	2.17274	0.00883045	11.924	5.528	62.751	49.183	0.12502	0.05796	0.65797	0.51569
Gm5800	chr14	2.16994	NA	0	0	8.964	16.767	0	0	0.33081	0.61873
Plb1	chr5	2.16196	0.000835329	14.479	16.584	87.404	81.599	0.08545	0.09787	0.51584	0.48158
Wfdc15a	chr2	2.16019	0.0530173	0.852	2.764	20.17	23.474	0.0574	0.18626	1.35925	1.58187
4931403E22Rik	chr19	2.15945	0.0476317	2.555	2.764	12.326	43.594	0.12012	0.12994	0.57947	2.04939
Elavl3	chr9	2.15566	0.00154541	35.771	29.482	77.319	283.918	0.22346	0.18417	0.48301	1.77362
2410007B07Rik	chr3	2.15503	0.0223887	4.258	8.292	26.893	63.714	0.12971	0.25256	0.81915	1.94067
Chrnb3	chr8	2.15254	0.0663654	0.852	0	32.496	4.471	0.00583	0	0.22238	0.0306
Spag8	chr4	2.1454	0.0308379	4.258	4.607	22.411	46.947	0.08507	0.09202	0.4477	0.93785
Dppa2	chr16	2.14022	0.0642824	2.555	0	25.773	16.767	0.04134	0	0.41698	0.27127
Dmkn	chr7	2.13878	0.0584865	6.814	0	15.688	68.185	0.09888	0	0.22766	0.98948
1700020N01Rik	chr10	2.13019	NA	0	0	14.567	10.06	0	0	0.43116	0.29776
Ugt1a6a	chr1	2.11184	NA	0	0	6.723	19.002	0	0	0.06394	0.18072
Lrrc6	chr15	2.10381	0.0208153	8.517	5.528	31.376	60.361	0.12834	0.0833	0.47279	0.90956
Cyp4f15	chr17	2.10196	1.47612e-10	82.614	73.706	313.757	392.344	1.2163	1.08514	4.61934	5.77634
Eomes	chr9	2.0822	0.019821	17.034	4.607	42.581	92.776	0.14399	0.03894	0.35995	0.78425
Mlxipl	chr5	2.08099	0.00112998	36.623	13.82	124.382	131.899	0.31518	0.11893	1.07044	1.13513
Ptk2b	chr14	2.07532	3.10918e-10	89.428	77.391	320.481	419.171	0.69617	0.60246	2.49484	3.26311
Gpr110	chr17	2.07105	NA	0	0	20.17	5.589	0	0	0.18077	0.05009
Gna14	chr19	2.07061	3.80074e-05	91.131	105.031	231.956	688.558	0.84594	0.97497	2.15318	6.39168
Prame	chrX	2.06864	NA	0	0	13.447	10.06	0	0	0.18627	0.13936
Uts2r	chr11	2.06212	NA	0	0	4.482	22.356	0	0	0.08265	0.41224
AY358078	chr14	2.0609	0.0846364	0.852	0	13.447	14.531	0.01831	0	0.28903	0.31234
Tmem63c	chr12	2.0551	NA	0	0	8.964	14.531	0	0	0.08446	0.13691
LOC100862268	chr3	2.05402	0.0138656	12.775	7.371	72.837	42.476	0.21851	0.12607	1.24581	0.72652
Nlrc4	chr17	2.0514	0.0156231	5.11	17.505	70.595	59.243	0.04181	0.14323	0.57763	0.48474
1700016K19Rik	chr11	2.05047	0.00401968	19.589	23.033	59.39	160.962	0.66793	0.78536	2.02502	5.48831
Pga5	chr19	2.05043	0.05878	3.407	2.764	16.808	35.769	0.07555	0.0613	0.37277	0.79327
Nme5	chr18	2.04967	0.000227935	38.326	35.932	113.177	238.089	1.45184	1.36113	4.28725	9.01906
Map3k19	chr1	2.0438	0.0872026	1.703	0	11.206	23.474	0.01359	0	0.0894	0.18728
Olr1	chr6	2.04225	0.0872487	2.555	0	43.702	5.589	0.02248	0	0.38453	0.04918
Efcab6	chr15	2.04129	0.039979	3.407	6.449	34.737	32.416	0.02093	0.03963	0.21344	0.19917
Gm13154	chr4	2.03895	2.61619e-05	29.809	35.932	151.276	147.548	0.33113	0.39914	1.68043	1.63902
Zbbx	chr3	2.03474	NA	0	0	7.844	15.649	0	0	0.10187	0.20324
Zic3	chrX	2.02492	2.97148e-05	566.377	526.997	1705.5	3213.64	4.40797	4.10148	13.2734	25.011
Slc24a4	chr12	2.016	0.0609613	5.11	1.843	25.773	29.063	0.07671	0.02766	0.38688	0.43626
4921511I17Rik	chr12	2.01478	0.0876937	0.852	1.843	13.447	21.238	0.01994	0.04315	0.31489	0.49735
2410004P03Rik	chr12	2.01014	4.18983e-05	37.475	50.673	149.035	243.678	0.65452	0.88504	2.603	4.25601
Gal3st2	chr1	2.0082	0.0960689	2.555	0	2.241	57.007	0.02819	0	0.02473	0.62903
Jakmip1	chr5	2.00657	0.039977	5.11	7.371	24.652	54.772	0.06737	0.09717	0.32501	0.72209
Dkk4	chr8	2.00062	0.096933	0.852	0.921	5.603	27.945	0.02035	0.02202	0.1339	0.66785
Padi3	chr4	2.00055	0.00112998	23.847	28.561	85.163	159.844	0.2441	0.29234	0.87171	1.63613
Foxh1	chr15	1.99872	7.90124e-24	275.097	251.521	974.889	1169.21	6.32429	5.78229	22.412	26.8792
Glra2	chrX	1.99648	0.054568	2.555	9.213	59.39	22.356	0.02931	0.10567	0.68117	0.25641
Banf2	chr2	1.99439	NA	0.852	0	15.688	11.178	0.05066	0	0.93305	0.66482
Gm13580	chr2	1.9885	0.0850377	3.407	0.921	20.17	22.356	0.1907	0.05157	1.12907	1.25142
Alox15	chr11	1.97807	0.103268	0	0.921	5.603	24.591	0	0.01199	0.07289	0.31991
Ccdc152	chr15	1.97347	0.083364	9.369	0	39.22	42.476	0.36868	0	1.5434	1.67154
AW495222	chr13	1.97054	NA	0	0	17.929	5.589	0	0	0.59266	0.18475
Slc52a3	chr2	1.96975	0.0519111	5.962	9.213	79.56	17.885	0.06769	0.1046	0.90327	0.20305
Dpys	chr15	1.96965	NA	0	0	5.603	17.885	0	0	0.06101	0.19474
AU019990	chr2	1.96965	NA	0	0	5.603	17.885	0	0	0.07055	0.2252
Usp17lb	chr7	1.96965	NA	0	0	5.603	17.885	0	0	0.12505	0.39917
Pde1c	chr6	1.95712	9.36715e-12	207.813	132.67	642.082	729.916	0.50881	0.32483	1.57208	1.78714
Plekhs1	chr19	1.95488	0.0506148	5.11	5.528	39.22	26.827	0.0672	0.0727	0.51576	0.35279
Pgr	chr9	1.95488	9.63322e-06	50.25	81.076	331.686	219.087	0.22906	0.36959	1.51199	0.9987
Gm7173	chrX	1.95208	0.0207596	6.814	14.741	50.425	61.478	0.07555	0.16346	0.55915	0.68172
Htr1d	chr4	1.95093	NA	0	0	15.688	6.707	0	0	0.15376	0.06573
E230019M04Rik	chrX	1.95024	NA	0	0	6.723	15.649	0	0	0.13992	0.32567
Cybb	chrX	1.94797	0.110172	0.852	0	25.773	4.471	0.00563	0	0.17039	0.02956
Cfap45	chr1	1.94741	0.00330099	17.886	30.404	78.439	143.077	0.30827	0.52403	1.35195	2.46603
Syce1	chr7	1.93447	0.110995	1.703	0.921	6.723	29.063	0.03659	0.01979	0.14442	0.62426
1700019A02Rik	chr1	1.93416	0.0912139	0.852	5.528	21.291	31.298	0.04266	0.27687	1.06635	1.56757
Tnfrsf8	chr4	1.93316	0.110747	1.703	0.921	7.844	26.827	0.03396	0.01837	0.1564	0.53489
Jade2	chr11	1.93201	6.33067e-11	102.203	115.165	386.594	473.943	0.52615	0.59288	1.99022	2.4399
Mesp1	chr7	1.92566	0.00549611	33.216	15.662	78.439	146.43	0.96852	0.45669	2.28715	4.26964
Hist1h1t	chr13	1.92499	0.00311414	22.144	20.269	72.837	117.368	0.94612	0.86601	3.11199	5.01462
Ush2a	chr1	1.92397	0.117319	1.703	0	3.362	36.887	0.00337	0	0.00664	0.0729
Fabp7	chr10	1.91367	8.89864e-13	189.928	223.881	655.529	951.238	7.82726	9.22655	27.0155	39.2022
Ninj2	chr6	1.91223	0.120173	0	1.843	16.808	14.531	0	0.0704	0.64214	0.55515
Ldhb	chr6	1.90814	6.03137e-25	1165.97	1341.45	3851.37	5701.84	28.384	32.6558	93.7567	138.804
Morn3	chr5	1.90666	0.096101	0.852	6.449	21.291	35.769	0.02885	0.21848	0.72125	1.21173
4932418E24Rik	chr2	1.90592	0.104181	1.703	2.764	15.688	23.474	0.017	0.02758	0.15655	0.23424
Vgll1	chrX	1.90376	0.113677	5.962	0	47.064	14.531	0.15773	0	1.24512	0.38444
Triml2	chr8	1.90247	0.10015	11.072	0	33.617	55.889	0.23701	0	0.71962	1.1964
Tmem72	chr6	1.89871	NA	0	0	2.241	24.591	0	0	0.0211	0.23156
Ms4a4d	chr19	1.89447	0.000269929	91.983	36.853	230.836	301.803	1.97307	0.79051	4.95152	6.47379
Pkhd1l1	chr15	1.89123	NA	0	0.921	20.17	6.707	0	0.00227	0.04972	0.01653
Pid1	chr1	1.88923	5.21355e-11	100.5	105.031	401.161	386.755	1.18337	1.23672	4.72359	4.55396
Sct	chr7	1.88631	1.72163e-05	49.398	98.582	303.672	285.036	2.89417	5.77573	17.7917	16.6998
Pcnxl2	chr8	1.8811	0.0379546	10.22	9.213	31.376	68.185	0.04436	0.03998	0.13617	0.29592
Kifc2	chr15	1.88075	1.88352e-09	137.975	175.973	476.239	726.563	1.37858	1.75824	4.75836	7.25947
Grm8	chr6	1.87666	0.00521804	15.331	23.033	79.56	87.188	0.13089	0.19666	0.6793	0.74442
Chit1	chr1	1.87519	0.131458	1.703	0	11.206	19.002	0.0289	0	0.19011	0.32239
Piwil2	chr14	1.8751	0.0418185	11.072	6.449	56.028	34.651	0.07077	0.04122	0.35813	0.22149
Phlda3	chr1	1.87093	3.41109e-18	189.076	191.635	688.025	732.152	4.04746	4.10224	14.7282	15.6728
Antxrl	chr14	1.87048	NA	0	0	4.482	17.885	0	0	0.06621	0.26418
A430089I19Rik	chr5	1.87048	NA	0	0	4.482	17.885	0	0	0.01904	0.07598
Gca	chr2	1.86459	0.000103113	109.869	70.942	227.474	491.827	1.04934	0.67756	2.17258	4.69739
Magea6	chrX	1.86356	NA	0	0	10.085	10.06	0	0	0.2637	0.26305
Gm13242	chr4	1.86338	0.020916	13.627	10.135	53.787	57.007	0.10725	0.07976	0.42333	0.44868
Ubxn10	chr4	1.86233	0.000635114	34.919	26.718	115.418	135.252	0.23964	0.18336	0.79207	0.92819
Gm13051	chr4	1.85988	0.000678101	29.809	29.482	108.695	131.899	0.33043	0.32681	1.20486	1.46208
Gm10220	chr5	1.85936	NA	0	0	5.603	15.649	0	0	0.05896	0.16469
Gpx2	chr12	1.85892	4.04061e-05	50.25	81.998	207.304	310.745	1.47893	2.41331	6.10126	9.14569
Cdx1	chr18	1.85665	3.37997e-23	743.529	1062.29	3027.76	3608.22	13.3425	19.0625	54.3325	64.7488
Tcte1	chr17	1.85476	0.126685	1.703	5.528	4.482	62.596	0.01741	0.05651	0.04582	0.63989
Igsf23	chr7	1.85197	0.0145846	47.695	11.056	146.794	116.25	0.79039	0.18321	2.43262	1.92646
1700019G24Rik	chr6	1.84864	NA	0	0	12.326	7.825	0	0	0.75162	0.47712
Tenm1	chrX	1.84777	0.0532258	11.924	4.607	45.943	40.24	0.04478	0.0173	0.17256	0.15114
Eps8l3	chr3	1.84545	0.104169	9.369	0.921	44.822	25.709	0.12961	0.01275	0.62008	0.35566
Cfap70	chr14	1.84392	0.0408396	7.665	11.977	35.858	60.361	0.06335	0.09898	0.29633	0.49882
Zmat4	chr8	1.84276	0.00125901	25.551	30.404	100.851	125.192	0.18964	0.22566	0.74853	0.9292
Dner	chr1	1.84073	0.072207	8.517	3.685	32.496	35.769	0.07364	0.03186	0.28097	0.30927
Ackr2	chr9	1.82865	NA	0	0	6.723	13.413	0	0	0.0701	0.13985
Nlrp5	chr7	1.8225	0.143341	0	3.685	19.05	21.238	0	0.03296	0.17038	0.18996
Trp53inp1	chr4	1.82213	1.94794e-10	258.915	157.546	758.621	764.568	1.49739	0.91114	4.38734	4.42173
Efhc1	chr1	1.81701	0.0172263	36.623	11.977	79.56	131.899	0.52087	0.17035	1.13154	1.87594
Rptn	chr3	1.81605	NA	0.852	0	10.085	13.413	0.00645	0	0.07639	0.1016
Dnah11	chr12	1.81552	1.92512e-05	50.25	68.178	196.098	249.267	0.11214	0.15215	0.43762	0.55627
Col6a5	chr9	1.81521	0.117034	5.962	1.843	38.099	15.649	0.02014	0.00622	0.12869	0.05286
Ccdc3	chr2	1.81486	0.081618	5.11	6.449	23.532	40.24	0.06037	0.0762	0.27802	0.47543
Cyp11a1	chr9	1.80843	NA	0	0.921	5.603	20.12	0	0.01631	0.09918	0.35617
Rs1	chrX	1.8081	0.146422	0	6.449	10.085	54.772	0	0.03468	0.05423	0.29452
Cacng8	chr7	1.80674	0.144766	5.11	0	16.808	32.416	0.11629	0	0.38249	0.73766
C330024D21Rik	chr5	1.80327	3.21594e-05	59.619	70.942	298.07	190.024	0.50073	0.59583	2.50345	1.59599
Fgf4	chr7	1.80064	0.000727142	45.14	108.716	224.112	367.753	0.46784	1.12675	2.32274	3.81144
Il33	chr19	1.79575	0.0581659	9.369	7.371	31.376	50.301	0.11303	0.08892	0.37853	0.60684
Gm8801	chr17	1.79278	0.0998346	11.924	1.843	48.184	31.298	0.20056	0.03099	0.81047	0.52644
Spaca1	chr4	1.79152	0.0631405	5.11	11.977	36.979	46.947	0.11905	0.27902	0.86146	1.09369
Neb	chr2	1.79005	2.58119e-12	155.86	156.625	503.133	605.842	0.21764	0.21871	0.70257	0.84599
C4bp-ps1	chr1	1.78807	NA	0.852	0	15.688	7.825	0.03547	0	0.65338	0.32588
Pilrb1	chr5	1.7875	NA	0.852	0	7.844	15.649	0.02622	0	0.2415	0.4818
Ambp	chr4	1.78374	0.0180194	63.025	17.505	235.318	102.837	1.6052	0.44584	5.99334	2.61915
Gfra3	chr18	1.78268	9.06027e-09	93.686	122.536	385.473	385.637	1.47694	1.93175	6.07689	6.07947
BC061237	chr14	1.77969	NA	0	0	11.206	7.825	0	0	0.39143	0.27332
Abca12	chr1	1.77856	0.130129	1.703	5.528	30.255	17.885	0.00643	0.02086	0.11416	0.06748
Xkr9	chr1	1.77712	0.159207	3.407	0	28.014	11.178	0.05555	0	0.45677	0.18226
Amhr2	chr15	1.77703	0.13079	3.407	2.764	20.17	21.238	0.05495	0.04458	0.32533	0.34255
Mcf2	chrX	1.77085	4.05771e-07	137.123	84.762	392.197	401.286	0.95649	0.59125	2.73574	2.79914
Nlrc5	chr8	1.77012	0.160687	5.11	0	7.844	46.947	0.02311	0	0.03547	0.21228
Adam2	chr14	1.76176	0.119411	5.962	3.685	15.688	41.358	0.07339	0.04537	0.19312	0.50913
Ahsg	chr16	1.76091	0.120173	3.407	6.449	15.688	42.476	0.07066	0.13377	0.3254	0.88104
Nlrp9b	chr7	1.76057	NA	0	0	4.482	15.649	0	0	0.04209	0.14696
Tdpoz3	chr3	1.75984	NA	0	0	3.362	17.885	0	0	0.09615	0.51151
Trpm1	chr7	1.75801	0.146526	3.407	1.843	16.808	21.238	0.01565	0.00847	0.07723	0.09758
Camk1d	chr2	1.75771	0.000347971	43.436	37.774	162.482	136.37	0.18579	0.16157	0.69497	0.58329
Kif9	chr9	1.75557	0.0757598	18.737	7.371	26.893	99.483	0.16865	0.06634	0.24206	0.89542
Lif	chr11	1.74793	0.11745	10.22	1.843	38.099	30.18	0.07397	0.01334	0.27574	0.21843
Eras	chrX	1.74774	3.73243e-07	219.737	121.615	540.111	658.378	6.40714	3.54606	15.7487	19.1971
Gabbr2	chr4	1.74397	0.0589601	11.072	9.213	32.496	59.243	0.08697	0.07237	0.25525	0.46534
1700012P22Rik	chr4	1.73767	NA	0	0	5.603	13.413	0	0	0.18102	0.43336
Sult6b1	chr17	1.73614	0.0434716	12.775	16.584	87.404	38.005	0.19475	0.25281	1.33242	0.57936
Ppapdc1a	chr7	1.73553	0.0734312	13.627	9.213	25.773	80.481	0.39332	0.26593	0.74389	2.32295
Gabra5	chr7	1.73276	0.0459225	10.22	11.977	45.943	49.183	0.12003	0.14066	0.53955	0.5776
Cyp2b19	chr7	1.73055	0.172732	0.852	0.921	0	48.065	0.00992	0.01074	0	0.56007
Ticam2	chr18	1.72466	0.0133344	18.737	52.515	105.333	169.904	0.18027	0.50526	1.01342	1.63467
Fa2h	chr8	1.72243	0.156311	5.962	0.921	20.17	26.827	0.07513	0.01161	0.25418	0.33806
Trim75	chr8	1.72192	0.165818	2.555	1.843	14.567	19.002	0.03204	0.02311	0.18269	0.23831
Lipc	chr9	1.72041	0.104335	28.958	1.843	71.716	82.716	0.47363	0.03014	1.17298	1.3529
Mir367	chr3	1.71549	NA	0.852	0.921	6.723	17.885	0.35661	0.38577	2.81516	7.4885
Tmem145	chr7	1.71525	0.0330248	26.403	19.348	47.064	138.606	0.3608	0.2644	0.64315	1.89412
Arhgap30	chr1	1.71519	0.0370089	20.441	17.505	42.581	112.897	0.14306	0.12251	0.29802	0.79014
Erich2	chr2	1.71481	0.00194976	28.958	47.909	126.624	152.019	0.51994	0.8602	2.27353	2.72951
A930001C03Rik	chr19	1.71284	NA	0.852	0.921	10.085	13.413	0.02242	0.02425	0.26547	0.35308
Nlrp14	chr7	1.71096	NA	0	0	8.964	8.942	0	0	0.08578	0.08556
Bpifb1	chr2	1.71092	0.174707	0.852	4.607	7.844	36.887	0.01562	0.0845	0.14388	0.67662
Rhox4c	chrX	1.71044	0.169499	1.703	2.764	19.05	14.531	0.05924	0.09612	0.66248	0.50535
C330024C12Rik	chr17	1.70884	0.184097	0	2.764	7.844	26.827	0	0.06218	0.17645	0.60348
Slc19a2	chr1	1.70673	9.0791e-08	92.835	98.582	338.41	309.628	0.81639	0.86693	2.97598	2.72286
Trim13	chr14	1.7045	1.00955e-12	260.619	194.399	768.706	747.801	4.81996	3.59528	14.2167	13.8301
Psors1c2	chr17	1.69468	0.0757707	12.775	10.135	28.014	72.656	0.47535	0.37708	1.04234	2.70338
Ipcef1	chr10	1.69357	0.124539	7.665	3.685	24.652	33.534	0.02921	0.01404	0.09395	0.1278
Nefm	chr14	1.69224	2.25296e-18	339.826	294.823	979.372	1102.14	3.30393	2.86639	9.52185	10.7155
2610305D13Rik	chr4	1.68839	3.49995e-09	181.411	143.726	606.224	473.943	2.22449	1.76239	7.43361	5.81156
Abhd12b	chr12	1.6862	NA	0.852	0	12.326	8.942	0.02476	0	0.35841	0.26002
Cox6b2	chr7	1.6828	6.38543e-08	106.462	111.48	329.445	394.58	5.41857	5.67399	16.7677	20.0829
Casp14	chr10	1.68232	NA	0	0	19.05	2.236	0	0	0.25664	0.03012
Ccdc60	chr5	1.68182	0.166315	7.665	0.921	21.291	32.416	0.09323	0.01121	0.25895	0.39426
Ephx1	chr1	1.68118	0.190247	0.852	2.764	6.723	26.827	0.01606	0.05213	0.12681	0.50598
Gabre	chrX	1.67654	0.00638687	26.403	44.223	98.609	155.373	0.29707	0.49759	1.10952	1.7482
Foxi3	chr6	1.6741	0.000266858	80.059	106.873	216.269	422.524	2.08469	2.78291	5.63148	11.0022
Zfp474	chr18	1.67193	NA	0	0	5.603	12.296	0	0	0.09116	0.20007
1700063O14Rik	chr5	1.67193	NA	0	0	5.603	12.296	0	0	0.35762	0.78481
Akap3	chr6	1.67193	NA	0	0	5.603	12.296	0	0	0.0558	0.12246
Htra1	chr7	1.66944	0.0346483	15.331	33.168	59.39	127.428	0.23611	0.51083	0.91468	1.96256
A530072M11Rik	chr4	1.66905	0.117829	10.22	4.607	45.943	24.591	0.1733	0.07811	0.77903	0.41698
Cdc20b	chr13	1.66772	NA	0.852	0.921	16.808	6.707	0.01714	0.01855	0.33836	0.13501
Gm13544	chr2	1.66659	0.0958969	8.517	7.371	31.376	39.123	0.09097	0.07873	0.33514	0.41789
Gm5591	chr7	1.66636	NA	0	0.921	12.326	8.942	0	0.00841	0.11249	0.08161
Dnah10	chr5	1.66631	0.143008	6.814	5.528	14.567	49.183	0.01524	0.01237	0.03259	0.11002
Dnaic2	chr11	1.66621	0.166315	0.852	11.056	24.652	44.712	0.00932	0.12093	0.26965	0.48906
Serpina6	chr12	1.66181	NA	0	0.921	5.603	16.767	0	0.01979	0.12035	0.36015
Msgn1	chr12	1.66113	0.0586529	246.991	478.166	849.386	2067.91	13.6797	26.4833	47.0434	114.531
Ptgds	chr2	1.66104	0.0686558	25.551	11.056	38.099	112.897	0.99675	0.43129	1.48626	4.40415
Spock1	chr13	1.6609	0.0128683	22.996	28.561	72.837	114.014	0.10822	0.13441	0.34277	0.53656
Ucp1	chr8	1.66	0.201389	1.703	0	20.17	6.707	0.03254	0	0.38529	0.12811
AW822252	chrX	1.65995	0.0781593	7.665	12.899	38.099	48.065	0.22268	0.37471	1.10679	1.3963
Gm2022	chr12	1.65106	NA	0	0	3.362	15.649	0	0	0.05794	0.26972
1700019G17Rik	chr6	1.65048	0.0137083	22.996	23.033	91.886	73.774	0.2203	0.22066	0.88027	0.70676
Pramef12	chr4	1.64931	0.0123644	25.551	28.561	119.9	73.774	0.32617	0.3646	1.5306	0.94177
Fam212b	chr3	1.64708	0.000622225	85.169	53.437	182.652	285.036	0.55942	0.35099	1.19972	1.87222
Naip6	chr13	1.64699	0.148637	5.11	5.528	17.929	35.769	0.02393	0.02589	0.08397	0.16753
Tmem215	chr4	1.64598	0.0302116	59.619	14.741	150.155	127.428	0.58036	0.1435	1.46168	1.24044
Ina	chr19	1.64377	1.02244e-06	88.576	108.716	299.19	340.926	1.23134	1.51131	4.15918	4.73936
1700012B09Rik	chr9	1.64166	NA	0	0	1.121	22.356	0	0	0.05137	1.02489
Tdrd6	chr17	1.64134	0.208013	0.852	2.764	4.482	30.18	0.00379	0.01229	0.01993	0.13421
Doc2b	chr11	1.64097	0.155233	7.665	2.764	30.255	23.474	0.05671	0.02045	0.22382	0.17365
Noxa1	chr2	1.64001	NA	0.852	0	3.362	20.12	0.01602	0	0.06321	0.37835
Gm20362	chr6	1.63954	0.0580893	432.661	141.884	1019.71	1227.33	6.50719	2.13392	15.3364	18.459
B020004J07Rik	chr4	1.63463	0.210758	2.555	0.921	4.482	29.063	0.04063	0.01465	0.07127	0.46211
Slc5a9	chr4	1.6326	0.1159	17.034	5.528	71.716	27.945	0.12269	0.03982	0.51654	0.20127
Slc5a8	chr10	1.63151	0.100404	14.479	5.528	41.461	43.594	0.08529	0.03256	0.24423	0.2568
Vwa5b1	chr4	1.6309	0.128029	5.962	13.82	21.291	68.185	0.04854	0.11252	0.17335	0.55516
Tpo	chr12	1.63002	NA	0	0	8.964	7.825	0	0	0.08578	0.07487
Dram1	chr10	1.62951	0.0382496	82.614	15.662	151.276	214.615	0.92425	0.17522	1.6924	2.40102
Slc9a9	chr9	1.62706	0.0515842	16.182	21.19	42.581	99.483	0.14553	0.19056	0.38293	0.89465
D17Ertd648e	chr17	1.62693	0.0536197	17.034	32.246	47.064	140.841	0.94676	1.79229	2.61585	7.82813
Amer3	chr1	1.62341	0.0484035	11.924	18.426	56.028	58.125	0.08596	0.13284	0.40392	0.41904
Spesp1	chr9	1.62228	NA	0.852	0	11.206	8.942	0.00888	0	0.11679	0.0932
Asic5	chr3	1.62133	NA	0	0	10.085	6.707	0	0	0.19113	0.12711
Rhox1	chrX	1.62133	NA	0	0	10.085	6.707	0	0	0.35908	0.23879
Tdrd5	chr1	1.61842	0.00294345	63.025	37.774	135.588	203.438	0.57005	0.34166	1.22636	1.84004
Rxrg	chr1	1.61777	0.00278304	57.064	35.932	181.531	130.781	0.75835	0.47752	2.41248	1.73803
Rnf17	chr14	1.61669	6.75987e-11	178.856	160.31	524.423	538.774	1.09125	0.9781	3.19966	3.28722
C8a	chr4	1.61523	0.215643	5.962	0	38.099	11.178	0.05151	0	0.32914	0.09657
Mir6368	chr13	1.61404	0.220084	0	2.764	11.206	19.002	0	0.93331	3.78381	6.41656
Tmed6	chr8	1.6117	0.116547	27.254	3.685	64.993	67.067	0.99174	0.1341	2.36499	2.44049
Cdh17	chr4	1.60753	0.222656	2.555	0	7.844	22.356	0.02318	0	0.07115	0.20279
Ankfn1	chr11	1.60564	0.116185	12.775	7.371	25.773	59.243	0.17983	0.10375	0.36278	0.8339
Ribc2	chr15	1.60507	NA	0.852	0.921	4.482	19.002	0.01619	0.01751	0.0852	0.36122
Cdh9	chr15	1.60485	NA	0	1.843	17.929	7.825	0	0.01994	0.19401	0.08467
BC039966	chr4	1.60325	NA	0	0	11.206	5.589	0	0	0.67413	0.33623
Gm19395	chr10	1.60324	0.192113	2.555	4.607	15.688	24.591	0.12194	0.21985	0.74871	1.17363
Ttc39b	chr4	1.60307	0.00106332	77.504	121.615	215.148	434.82	0.27771	0.43577	0.77092	1.55806
Ephx2	chr14	1.60262	6.84837e-06	147.343	92.132	369.786	388.991	1.78789	1.11795	4.48706	4.7201
Mro	chr18	1.59938	0.208464	3.407	1.843	15.688	17.885	0.04883	0.02641	0.22485	0.25634
1700007K13Rik	chr2	1.5992	0.0799625	17.886	9.213	40.34	64.832	0.69859	0.35986	1.57565	2.53226
Gm10768	chr19	1.59811	0.0920874	71.542	6.449	155.758	153.137	1.09969	0.09913	2.39419	2.3539
Armc2	chr10	1.59376	0.168479	10.22	2.764	40.34	22.356	0.06597	0.01784	0.26039	0.14431
Tppp3	chr8	1.5899	0.110034	16.182	17.505	23.532	112.897	0.49627	0.53684	0.72166	3.46224
Slc4a11	chr2	1.5868	0.153786	17.886	2.764	58.269	34.651	0.17547	0.02712	0.57165	0.33995
Asgr2	chr11	1.58116	0.128237	15.331	6.449	63.872	26.827	0.3509	0.14762	1.46195	0.61404
Rln3	chr8	1.57955	0.0925937	15.331	10.135	33.617	64.832	1.01354	0.67002	2.22249	4.28618
Mapk15	chr15	1.57826	0.141829	5.11	10.135	32.496	32.416	0.08315	0.1649	0.52875	0.52744
Fkbp6	chr5	1.57792	0.222193	0.852	4.607	19.05	16.767	0.01525	0.08248	0.34106	0.30019
Slc10a6	chr5	1.57582	0.210083	0	0	0	34.651	0	0	0	0.51232
Svop	chr5	1.57388	0.128046	8.517	9.213	25.773	46.947	0.08395	0.09081	0.25404	0.46274
Olfr695	chr7	1.57362	NA	0	0	4.482	12.296	0	0	0.1172	0.3215
Lman1l	chr9	1.57009	NA	0.852	1.843	8.964	15.649	0.0154	0.03331	0.16207	0.28292
Cfap57	chr4	1.56931	0.0638336	13.627	14.741	52.666	50.301	0.10987	0.11885	0.42462	0.40555
Adad1	chr3	1.56907	0.225234	1.703	3.685	10.085	24.591	0.02713	0.05869	0.1606	0.39161
AI467606	chr7	1.56897	NA	1.703	0.921	7.844	16.767	0.02789	0.01508	0.12843	0.27452
Gsn	chr2	1.56444	0.00596814	151.602	48.83	289.105	362.164	1.62042	0.52193	3.09016	3.87106
D130043K22Rik	chr13	1.56435	0.199552	6.814	2.764	34.737	14.531	0.04299	0.01744	0.21918	0.09169
9530080O11Rik	chr4	1.56213	0.208464	3.407	3.685	21.291	16.767	0.06188	0.06693	0.3867	0.30453
4931408D14Rik	chr19	1.55975	0.138149	11.072	13.82	20.17	81.599	0.10731	0.13395	0.1955	0.79089
Gucy2c	chr6	1.55963	0.239225	1.703	1.843	16.808	10.06	0.01359	0.0147	0.13411	0.08026
Nos1	chr5	1.55894	0.194243	4.258	5.528	14.567	33.534	0.03048	0.03956	0.10425	0.23999
Cpne4	chr9	1.55804	0.0040242	86.873	41.46	174.808	236.971	0.74661	0.35631	1.50234	2.03659
Gprin3	chr6	1.55729	NA	0	0	1.121	20.12	0	0	0.01135	0.20382
Rsph1	chr17	1.55727	0.00663756	74.097	34.089	154.638	195.613	2.00078	0.92047	4.17553	5.28195
Hrnr	chr3	1.55491	NA	0.852	1.843	7.844	16.767	0.00251	0.00543	0.02311	0.0494
Trp53cor1	chr17	1.55422	0.0850892	11.072	23.033	41.461	83.834	0.11141	0.23176	0.41718	0.84354
4933433C11Rik	chr2	1.55313	0.18852	5.11	4.607	24.652	21.238	0.11222	0.10116	0.54138	0.46639
Nek5	chr8	1.54942	0.22083	8.517	0.921	17.929	34.651	0.11126	0.01204	0.23421	0.45265
Acot12	chr13	1.54713	0.24874	2.555	0	4.482	26.827	0.02632	0	0.04617	0.27631
Cd80	chr16	1.54683	0.208064	4.258	3.685	22.411	17.885	0.07866	0.06808	0.41399	0.33038
Scn2b	chr9	1.54473	1.02227e-05	99.648	112.401	276.779	365.517	0.68595	0.77374	1.90526	2.5161
Msrb2	chr2	1.54245	0.00143418	57.064	79.234	259.97	164.315	1.50461	2.08917	6.8547	4.33253
LOC102633315	chr8	1.54205	0.145333	8.517	9.213	23.532	48.065	0.28605	0.30944	0.79035	1.61433
Ccdc33	chr9	1.54138	0.106504	11.924	10.135	35.858	46.947	0.1041	0.08848	0.31306	0.40987
Sytl3	chr17	1.53623	0.135818	14.479	9.213	68.354	24.591	0.18513	0.1178	0.874	0.31443
Scn4a	chr11	1.5358	0.155344	11.924	5.528	25.773	45.829	0.05675	0.02631	0.12267	0.21813
4930524B15Rik	chr11	1.53568	NA	0	0.921	10.085	8.942	0	0.01477	0.16167	0.14335
Tgm3	chr2	1.53378	0.138318	9.369	26.718	113.177	27.945	0.071	0.20247	0.85766	0.21177
Ube2l6	chr2	1.53276	0.000203458	275.949	125.3	524.423	697.5	6.24782	2.83694	11.8736	15.7923
Wdr20rt	chr12	1.53183	NA	0	0	13.447	3.353	0	0	0.18953	0.04727
Gk2	chr5	1.52949	NA	0	0	5.603	10.06	0	0	0.09521	0.17095
Dsg3	chr18	1.52217	NA	0.852	0.921	7.844	12.296	0.00651	0.00704	0.05996	0.09399
Ppp3r2	chr4	1.52068	NA	0	1.843	14.567	8.942	0	0.01939	0.15325	0.09408
Blnk	chr19	1.52061	0.0300132	20.441	47.909	124.382	98.365	0.30611	0.71745	1.86267	1.47306
Dand5	chr8	1.51727	0.000358442	59.619	73.706	189.375	212.38	1.11442	1.37774	3.53989	3.96991
Runx2	chr17	1.51621	0.00144381	70.691	46.987	178.169	181.082	0.25952	0.1725	0.65409	0.66479
Gm15713	chr16	1.5122	0.261505	1.703	1.843	15.688	10.06	0.0346	0.03743	0.31866	0.20435
Slc26a5	chr5	1.51122	0.252144	0.852	6.449	11.206	32.416	0.00579	0.04388	0.07623	0.22053
Ccdc65	chr15	1.51116	0.166315	5.962	14.741	23.532	59.243	0.09975	0.24663	0.3937	0.99117
Srrm4os	chr5	1.51015	0.168479	9.369	6.449	40.34	23.474	0.08761	0.06031	0.37725	0.21952
Dnajb7	chr15	1.50997	0.142501	6.814	13.82	45.943	32.416	0.18041	0.36593	1.2165	0.85832
Gm6812	chrX	1.50927	NA	0.852	0.921	4.482	16.767	0.05075	0.0549	0.26709	0.99912
Ccdc162	chr10	1.5092	0.0888493	12.775	14.741	51.546	44.712	0.14594	0.1684	0.58884	0.51077
Tmem252	chr19	1.50906	0.104856	23.847	9.213	73.957	44.712	0.30418	0.11752	0.94334	0.57031
Elfn2	chr15	1.50752	NA	0	1.843	19.05	5.589	0	0.0119	0.12307	0.03611
Npas2	chr1	1.50648	0.140882	13.627	7.371	31.376	48.065	0.10238	0.05537	0.23572	0.3611
Gm1045	chr5	1.50437	NA	0	0	4.482	11.178	0	0	0.18545	0.46248
Zcchc12	chrX	1.50389	0.0380766	20.441	36.853	113.177	72.656	0.29324	0.52869	1.62363	1.04233
Myt1l	chr12	1.50294	0.0251565	33.216	23.954	104.212	78.245	0.13865	0.09999	0.43502	0.32662
AU015836	chrX	1.50271	6.96599e-05	102.203	95.818	242.041	343.161	1.06984	1.003	2.53364	3.59214
Fbxo15	chr18	1.50138	0.179256	15.331	5.528	21.291	63.714	0.30355	0.10946	0.42156	1.26156
Cdkl2	chr5	1.49871	0.00643207	50.25	44.223	112.056	177.728	0.34485	0.30349	0.769	1.21968
Abca17	chr17	1.49858	NA	0.852	0	1.121	23.474	0.00514	0	0.00676	0.1417
Fuom	chr7	1.49263	0.104154	21.292	20.269	33.617	111.779	0.27676	0.26346	0.43695	1.45291
9030617O03Rik	chr12	1.49212	0.212625	6.814	4.607	16.808	33.534	0.06626	0.0448	0.16347	0.32613
Izumo1r	chr9	1.49123	0.239778	5.11	2.764	15.688	23.474	0.08717	0.04715	0.2676	0.40041
Chrd	chr16	1.49059	0.103436	14.479	21.19	35.858	88.305	0.13609	0.19918	0.33704	0.83002
Noto	chr6	1.49006	0.0308864	24.699	33.168	71.716	111.779	0.48417	0.65017	1.40582	2.19116
Mlana	chr19	1.48962	0.275269	0.852	1.843	2.241	25.709	0.05802	0.12552	0.15267	1.75131
Ankef1	chr2	1.48721	0.169351	16.182	9.213	20.17	78.245	0.18662	0.10625	0.23261	0.90237
Nkx1-2	chr7	1.48634	8.62061e-18	1303.94	1881.34	4397.09	4614.23	21.5177	31.046	72.5609	76.1442
Nat1	chr8	1.48529	0.158166	10.22	13.82	22.411	68.185	0.23845	0.32243	0.52287	1.59082
Tsnaxip1	chr8	1.48286	0.140882	11.072	11.977	28.014	55.889	0.15733	0.17019	0.39807	0.79417
Usp26	chrX	1.48197	NA	0	0.921	23.532	1.118	0	0.007	0.1788	0.00849
Riiad1	chr3	1.47913	0.181803	5.962	12.899	22.411	51.418	0.29813	0.645	1.12068	2.57119
Cdkn1a	chr17	1.47664	3.52476e-15	445.436	580.433	1464.58	1421.83	6.90434	8.99682	22.7012	22.0386
Trpa1	chr1	1.47514	0.0837426	12.775	21.19	54.908	58.125	0.09411	0.1561	0.40448	0.42818
Ehf	chr2	1.47463	0.251366	5.11	2.764	13.447	25.709	0.03658	0.01979	0.09626	0.18403
Dnajc6	chr4	1.47443	0.153836	9.369	19.348	78.439	26.827	0.05257	0.10857	0.44018	0.15055
Ttll6	chr11	1.47177	0.261247	5.962	2.764	7.844	38.005	0.0584	0.02707	0.07683	0.37226
Cyp4f39	chr17	1.47061	NA	0.852	0	11.206	6.707	0.01022	0	0.13441	0.08045
Fbp1	chr13	1.46912	0.278138	7.665	0	26.893	21.238	0.16276	0	0.57103	0.45094
Aldh3a1	chr11	1.46764	NA	0	0	2.241	14.531	0	0	0.04075	0.26423
Olfr986	chr9	1.46764	NA	0	0	2.241	14.531	0	0	0.06927	0.44914
Gm2381	chr7	1.46748	0.0594984	22.144	17.505	67.234	60.361	0.17065	0.1349	0.51813	0.46516
Pramef6	chr4	1.46578	NA	0	0	3.362	12.296	0	0	0.07099	0.25967
Asprv1	chr6	1.46505	0.128237	13.627	28.561	112.056	34.651	0.27951	0.58583	2.29846	0.71076
Dclk3	chr9	1.46501	0.266873	8.517	0.921	36.979	13.413	0.07646	0.00827	0.33198	0.12042
Cyp7a1	chr4	1.46229	NA	0	0	7.844	6.707	0	0	0.05904	0.05048
Csmd3	chr15	1.46212	0.288238	2.555	0	6.723	20.12	0.00616	0	0.01621	0.04852
Cxx1c	chrX	1.46063	1.57584e-07	379.004	437.628	863.954	1436.36	12.5021	14.4359	28.499	47.3808
Zscan10	chr17	1.45775	4.64736e-13	379.856	398.011	960.322	1203.86	4.36152	4.56998	11.0265	13.8227
Hpcal4	chr4	1.45765	0.174411	8.517	11.056	23.532	49.183	0.05749	0.07463	0.15885	0.33201
Acss1	chr2	1.45613	0.0300447	32.364	24.876	96.368	79.363	0.28279	0.21736	0.84204	0.69345
Adora2b	chr11	1.45578	0.0211041	96.241	33.168	197.219	195.613	1.639	0.56485	3.35865	3.3313
Tmem8c	chr2	1.45253	NA	0	0	8.964	5.589	0	0	0.18856	0.11756
Olfr558	chr7	1.45253	NA	0	0	8.964	5.589	0	0	0.09631	0.06005
Rbp7	chr4	1.45251	NA	0.852	0	12.326	5.589	0.04503	0	0.65166	0.29547
Wfdc13	chr2	1.45198	0.291374	0	6.449	13.447	30.18	0	0.18857	0.39318	0.88246
Gtsf1l	chr2	1.45171	0.255967	4.258	4.607	29.135	12.296	0.15197	0.16439	1.03969	0.43878
Nek11	chr9	1.45025	0.291914	0	9.213	8.964	52.536	0	0.11022	0.10724	0.6285
Lrrk2	chr15	1.44577	3.96739e-05	110.72	105.031	265.573	343.161	0.42248	0.40077	1.01335	1.30941
Acacb	chr5	1.445	0.0205151	42.585	35.01	88.524	144.195	0.15761	0.12957	0.32763	0.53367
Tnip3	chr6	1.44166	NA	0.852	0	3.362	15.649	0.0071	0	0.02801	0.13039
Lrrc9	chr12	1.43989	0.00658429	42.585	48.83	119.9	146.43	0.25487	0.29225	0.7176	0.87639
B3gnt7	chr1	1.43943	1.96607e-10	224.847	246.914	679.061	620.373	2.72099	2.98803	8.21765	7.50744
Ppp1r36	chr12	1.4373	0.293925	1.703	2.764	13.447	13.413	0.03681	0.05974	0.29062	0.2899
Scn1b	chr7	1.43637	0.286157	0.852	6.449	15.688	23.474	0.01765	0.13368	0.32518	0.48657
Slco1c1	chr6	1.43636	0.246983	4.258	6.449	30.255	15.649	0.04208	0.06373	0.29897	0.15464
E230008N13Rik	chr4	1.43492	0.301941	3.407	0.921	4.482	26.827	0.02106	0.00569	0.0277	0.16581
Phlda2	chr7	1.43478	0.00263989	1681.24	2590.76	5010.03	7239.92	71.6374	110.392	213.476	308.491
Tnfrsf13c	chr15	1.43143	0.140628	16.182	12.899	31.376	67.067	0.26662	0.21252	0.51695	1.10501
Teddm2	chr1	1.43123	NA	0	0	4.482	10.06	0	0	0.0851	0.191
Ttc25	chr11	1.42944	0.057266	29.809	18.426	70.595	78.245	0.33219	0.20534	0.78671	0.87195
Kcnmb2	chr3	1.4273	0.195194	5.11	14.741	40.34	32.416	0.05498	0.15859	0.43399	0.34874
H60c	chr10	1.42685	0.306743	0	4.607	17.929	15.649	0	0.05135	0.19987	0.17445
Zyg11a	chr4	1.4261	0.226317	5.11	8.292	31.376	21.238	0.07011	0.11376	0.43045	0.29137
H2afy3	chr15	1.42589	0.182918	5.962	15.662	42.581	34.651	0.09797	0.25738	0.69974	0.56943
Prss1	chr6	1.42468	NA	0.852	0	4.482	13.413	0.03314	0	0.17442	0.52197
Rinl	chr7	1.42437	0.00682982	146.491	58.965	319.36	272.741	1.60067	0.64429	3.48956	2.98016
Fndc9	chr11	1.42364	0.0575938	22.996	23.033	60.51	80.481	0.31911	0.31963	0.8397	1.11682
Foxa3	chr7	1.42355	0.0257544	66.432	29.482	155.758	128.546	1.02315	0.45407	2.39889	1.97978
Tat	chr8	1.42316	NA	0	0.921	3.362	15.649	0	0.01217	0.04441	0.20674
Strip2	chr6	1.41987	0.0321001	35.771	26.718	104.212	81.599	0.20923	0.15628	0.60954	0.47727
C4bp	chr1	1.41941	0.309905	2.555	0	6.723	19.002	0.04261	0	0.11213	0.31691
Clca6	chr3	1.41629	0.11958	15.331	14.741	40.34	57.007	0.16058	0.15441	0.42256	0.59714
Fgfbp1	chr5	1.41609	0.0206951	36.623	46.987	94.127	149.784	0.92154	1.18234	2.36852	3.769
Olfr985	chr9	1.41546	NA	0	0	1.121	16.767	0	0	0.03153	0.47181
Upk3a	chr15	1.4154	0.214863	19.589	4.607	63.872	26.827	0.5562	0.1308	1.81356	0.76171
Runx1	chr16	1.41516	0.0157064	114.127	45.145	266.694	195.613	0.48577	0.19215	1.13514	0.8326
4933406J08Rik	chr2	1.41497	NA	1.703	0.921	7.844	13.413	0.02534	0.01371	0.11669	0.19954
Isg20	chr7	1.41407	0.162129	15.331	8.292	39.22	41.358	0.30567	0.16533	0.78199	0.82463
Abhd3	chr18	1.40991	0.218844	8.517	6.449	23.532	32.416	0.14174	0.10733	0.39162	0.53946
Meig1	chr2	1.4098	NA	0.852	0	7.844	8.942	0.03788	0	0.3489	0.39776
Ube2d2b	chr5	1.40809	0.172302	8.517	14.741	48.184	31.298	0.16551	0.28646	0.93635	0.60821
Ptprv	chr1	1.40725	0.185204	11.924	9.213	25.773	48.065	0.06159	0.04759	0.13312	0.24826
Dnah2	chr11	1.40649	0.0304177	44.288	45.145	85.163	176.611	0.10149	0.10345	0.19515	0.40471
E4f1	chr17	1.40595	0.000873859	246.14	112.401	480.721	515.301	2.90696	1.32748	5.67742	6.08581
Serpinb9b	chr13	1.40442	0.285046	2.555	5.528	19.05	17.885	0.0416	0.08999	0.31012	0.29115
Dnah7b	chr1	1.40385	1.13187e-05	138.826	134.513	324.963	419.171	0.35392	0.34293	0.82846	1.06863
Ido1	chr8	1.40244	0.2863	2.555	5.528	16.808	20.12	0.04531	0.09802	0.29805	0.35677
Gpr133	chr5	1.40231	0.219212	18.737	3.685	43.702	39.123	0.11397	0.02242	0.26581	0.23796
Epha1	chr6	1.40123	4.63482e-07	264.025	289.295	599.501	894.231	2.53324	2.77569	5.75202	8.57986
Cdh1	chr8	1.40083	0.000727142	2735.64	2023.22	5286.81	7849.11	19.4671	14.3975	37.6215	55.8551
Havcr1	chr11	1.39799	NA	0	0	11.206	3.353	0	0	0.16773	0.05019
Rimbp2	chr5	1.39769	0.126995	13.627	16.584	41.461	54.772	0.10036	0.12214	0.30535	0.40338
Tctex1d1	chr4	1.39721	0.316033	2.555	1.843	13.447	12.296	0.03547	0.02558	0.18668	0.1707
Celf4	chr18	1.39693	1.19336e-10	302.352	258.892	723.883	775.746	1.71202	1.46593	4.09888	4.39254
Lurap1l	chr4	1.39219	0.157287	19.589	13.82	30.255	79.363	0.36207	0.25544	0.55922	1.4669
Tprg	chr16	1.38929	0.317737	1.703	3.685	7.844	22.356	0.04935	0.10676	0.22724	0.64764
Ddit4l	chr3	1.38887	3.7264e-05	112.424	105.952	279.02	310.745	1.29749	1.22281	3.2202	3.58635
Tnfsf11	chr14	1.38827	NA	0.852	0.921	11.206	6.707	0.01197	0.01295	0.15745	0.09423
Gpr158	chr2	1.38775	NA	0.852	0	11.206	5.589	0.00375	0	0.04928	0.02458
Adra2b	chr2	1.38636	0.023356	50.25	74.627	114.297	241.442	0.40092	0.59541	0.91192	1.92635
Tfpi2	chr6	1.38407	0.199228	28.958	6.449	85.163	36.887	0.60303	0.1343	1.77347	0.76815
4933417E11Rik	chr1	1.38014	0.319949	5.11	0.921	15.688	16.767	0.14682	0.02647	0.45073	0.48173
Lrrc18	chr14	1.37982	0.198655	20.441	11.977	22.411	88.305	0.23626	0.13843	0.25903	1.02064
Mmp12	chr9	1.37879	0.307625	2.555	4.607	20.17	13.413	0.02225	0.04011	0.17561	0.11678
Gbx2	chr1	1.37769	3.26057e-11	578.301	560.164	1251.67	1744.87	8.54214	8.27425	18.4885	25.7736
Tac4	chr11	1.37763	0.324043	5.11	2.764	3.362	40.24	0.12869	0.06961	0.08466	1.01338
Bcl11a	chr11	1.37608	0.264639	20.441	4.607	15.688	81.599	0.09148	0.02062	0.07021	0.36518
0610005C13Rik	chr7	1.37441	0.118276	40.881	16.584	122.141	54.772	1.14422	0.46416	3.41858	1.53299
Rtn4rl1	chr11	1.37421	0.00185165	61.322	73.706	182.652	184.435	0.58214	0.6997	1.73394	1.75087
Grin2c	chr11	1.37346	0.178317	14.479	13.82	26.893	65.95	0.09289	0.08866	0.17253	0.42309
AU040972	chr11	1.37117	0.0154678	44.288	39.617	125.503	108.426	1.33988	1.19856	3.79693	3.28028
9030625G05Rik	chr18	1.36845	0.225686	5.962	11.977	33.617	29.063	0.17882	0.35924	1.00829	0.87169
Rex2	chr4	1.36652	0.319055	2.555	3.685	14.567	15.649	0.02007	0.02895	0.11442	0.12292
Fxyd7	chr7	1.36485	NA	2.555	0.921	7.844	15.649	0.11835	0.04267	0.36331	0.72483
Slc15a5	chr6	1.36392	NA	0.852	0	12.326	4.471	0.01087	0	0.15729	0.05705
Avpr1a	chr10	1.36344	0.332472	4.258	0.921	16.808	12.296	0.05007	0.01083	0.19762	0.14456
Apln	chrX	1.36298	0.0316285	508.462	416.438	856.11	1747.1	5.07224	4.15424	8.54026	17.4285
Rnase10	chr14	1.36292	NA	0	1.843	15.688	5.589	0	0.03475	0.29589	0.10541
Gm1600	chr16	1.36149	0.254841	8.517	5.528	23.532	27.945	0.05957	0.03866	0.16458	0.19545
Klk11	chr7	1.35932	0.316536	3.407	3.685	13.447	19.002	0.07383	0.07987	0.29142	0.41183
Gm805	chr12	1.35833	0.33919	3.407	1.843	29.135	3.353	0.03386	0.01831	0.28953	0.03333
AA414768	chrX	1.35733	0.181738	18.737	8.292	41.461	45.829	0.35255	0.15602	0.78011	0.86231
Sycp3	chr10	1.35619	0.163525	16.182	21.19	31.376	86.07	0.45292	0.59309	0.87817	2.40898
Sult4a1	chr15	1.35544	7.37585e-10	254.657	254.285	629.756	690.794	3.35589	3.35099	8.29898	9.10334
Aspn	chr13	1.35445	0.0603011	23.847	28.561	77.319	72.656	0.31854	0.3815	1.03278	0.9705
Rhox2g	chrX	1.3544	NA	0	0	8.964	4.471	0	0	0.35189	0.17551
Ap1s3	chr1	1.35405	2.03131e-13	453.953	386.956	1066.78	1105.49	4.95677	4.22521	11.6482	12.071
4930591A17Rik	chr2	1.35383	NA	0	0	4.482	8.942	0	0	0.19151	0.38207
Ppef1	chrX	1.35383	NA	0	0	4.482	8.942	0	0	0.05669	0.1131
Efhc2	chrX	1.35259	0.00571321	103.907	59.886	249.885	193.378	1.27761	0.73634	3.07253	2.37772
Neurod1	chr2	1.35023	0.321561	1.703	6.449	15.688	21.238	0.02145	0.08121	0.19753	0.26742
Gpr3	chr4	1.34885	NA	2.555	0.921	16.808	6.707	0.03744	0.0135	0.24631	0.09828
Atg9b	chr5	1.34623	0.344979	2.555	0.921	1.121	29.063	0.02056	0.00741	0.00902	0.2339
BC048546	chr6	1.34518	0.344599	8.517	0	40.34	10.06	0.05693	0	0.26965	0.06725
Tll2	chr19	1.34379	0.341691	2.555	4.607	3.362	35.769	0.02382	0.04294	0.03134	0.33341
Rerg	chr6	1.34171	0.219356	15.331	21.19	20.17	100.601	0.20814	0.2877	0.27385	1.36585
Trim43c	chr9	1.34076	0.310346	3.407	6.449	14.567	25.709	0.05376	0.10177	0.22988	0.40571
Tmem51	chr4	1.3389	0.00408457	97.093	59.886	207.304	211.262	1.62703	1.00353	3.47388	3.5402
Cxcl14	chr13	1.3386	0.350356	0	4.607	5.603	29.063	0	0.07918	0.0963	0.49954
Tbc1d22bos	chr17	1.33658	0.260441	11.924	5.528	21.291	40.24	0.27757	0.12868	0.49563	0.93676
Pla2g10	chr16	1.33306	NA	0.852	1.843	13.447	6.707	0.01669	0.0361	0.26343	0.13139
Galnt12	chr4	1.33241	0.0853188	39.178	31.325	59.39	141.959	0.5552	0.44391	0.84162	2.01173
Ano9	chr7	1.33227	0.0408769	32.364	35.01	82.922	102.837	0.33743	0.36502	0.86455	1.07218
Ogn	chr13	1.33171	0.0976071	26.403	24.876	51.546	96.13	0.32643	0.30755	0.63729	1.1885
Ubl4b	chr3	1.33121	NA	0.852	0	8.964	6.707	0.01944	0	0.20459	0.15306
Pde6c	chr19	1.33064	0.261527	52.805	2.764	122.141	71.538	0.55965	0.02929	1.29452	0.7582
Akr1c19	chr13	1.33062	0.0201526	44.288	40.538	107.574	121.839	1.1198	1.02499	2.71996	3.08064
B3galt2	chr1	1.33025	0.00159849	80.911	70.021	193.857	202.32	0.55502	0.48031	1.32979	1.38784
Rhox6	chrX	1.33003	0.290003	21.292	1.843	41.461	44.712	0.77301	0.0669	1.50521	1.62323
Olfm4	chr14	1.32828	0.350356	0.852	4.607	13.447	15.649	0.01631	0.08821	0.25748	0.29965
Gm7102	chr19	1.32473	0.0400803	500.796	486.458	867.315	1834.29	9.68393	9.40667	16.7713	35.4698
Oas3	chr5	1.32348	0.00111134	102.203	76.47	236.439	229.147	0.68027	0.50899	1.57375	1.52522
Klf5	chr14	1.32336	3.77e-05	137.123	119.772	344.013	316.334	2.4963	2.18043	6.2627	5.75882
Zfp365	chr10	1.32156	1.4887e-05	156.712	169.523	469.516	365.517	1.15604	1.25055	3.46356	2.69637
Ccdc81	chr7	1.32141	0.35553	0	2.764	23.532	3.353	0	0.03225	0.27461	0.03913
AI854517	chr7	1.31982	0.188496	11.072	14.741	38.099	41.358	0.08738	0.11634	0.30069	0.32641
Rasgef1c	chr11	1.3197	0.317737	5.11	7.371	39.22	10.06	0.07151	0.10315	0.54885	0.14078
Scel	chr14	1.31915	0.190403	20.441	9.213	40.34	51.418	0.21025	0.09477	0.41494	0.52889
Esyt3	chr9	1.31841	0.01196	51.953	49.751	124.382	145.313	0.36328	0.34789	0.86975	1.0161
Klc3	chr7	1.3176	0.317123	7.665	4.607	36.979	11.178	0.1187	0.07133	0.57261	0.17309
Ttc29	chr8	1.31649	NA	0	0.921	7.844	7.825	0	0.01181	0.10054	0.10029
Echdc2	chr4	1.31599	2.59301e-05	160.119	140.041	344.013	422.524	3.84718	3.36478	8.26561	10.152
Adap2	chr11	1.31578	0.363502	5.11	0	14.567	17.885	0.10049	0	0.28645	0.35168
Gm10653	chr9	1.31565	0.301078	344.085	61.729	719.401	774.628	8.77063	1.57345	18.3374	19.7451
Fhad1	chr4	1.31541	0.288383	11.072	7.371	13.447	52.536	0.07718	0.05138	0.09373	0.36622
Got1l1	chr8	1.31451	0.135839	17.886	17.505	51.546	51.418	0.41421	0.4054	1.19374	1.19079
Pglyrp3	chr3	1.3144	0.128738	21.292	16.584	51.546	58.125	0.60293	0.4696	1.45962	1.64592
Prss42	chr9	1.31289	NA	0	0.921	2.241	15.649	0	0.01861	0.04526	0.31603
Psg17	chr7	1.31061	NA	0	1.843	14.567	5.589	0	0.02777	0.21951	0.08422
L1td1	chr4	1.3106	0.202395	522.089	172.287	800.082	1343.58	5.57286	1.83902	8.5402	14.3416
Prune2	chr19	1.30698	8.86166e-06	152.453	148.333	359.701	401.286	0.38264	0.3723	0.9028	1.00717
Glis1	chr4	1.3039	1.2964e-05	137.975	162.153	378.75	378.93	1.49203	1.75349	4.09574	4.09769
Kcnj15	chr16	1.30342	0.0123134	126.902	67.257	200.581	308.51	0.72922	0.38647	1.15259	1.77278
Slc28a2	chr2	1.3032	0.075271	105.61	31.325	227.474	149.784	0.84952	0.25197	1.82978	1.20484
Dnaaf1	chr8	1.30315	0.268745	12.775	5.528	25.773	35.769	0.14222	0.06154	0.2869	0.39818
Gm10538	chr1	1.30149	NA	1.703	0.921	4.482	15.649	0.02847	0.0154	0.07491	0.26154
Sidt1	chr16	1.30104	0.333908	3.407	6.449	13.447	25.709	0.02508	0.04749	0.09901	0.1893
4930564C03Rik	chr17	1.30067	0.272072	6.814	9.213	26.893	26.827	0.18102	0.24478	0.71451	0.71274
Dnmt3b	chr2	1.29856	0.00876342	4837.62	5026.74	9206.54	16408	35.1093	36.4817	66.8168	119.082
Nat8	chr6	1.29843	0.368779	8.517	0	24.652	20.12	0.28698	0	0.83065	0.67794
Hs3st5	chr10	1.29839	NA	0.852	0	4.482	11.178	0.00864	0	0.04548	0.11342
Ccdc114	chr7	1.29782	0.0762418	27.254	34.089	66.113	101.719	0.34891	0.43641	0.84638	1.30221
D230030E09Rik	chr12	1.2952	0.0700022	26.403	62.65	136.709	105.072	0.93793	2.22559	4.85646	3.7326
Susd5	chr9	1.29241	0.156218	13.627	24.876	61.631	49.183	0.11046	0.20165	0.49959	0.39868
Ccdc87	chr19	1.29188	NA	0.852	1.843	8.964	10.06	0.00846	0.01829	0.089	0.09988
D5Ertd605e	chr5	1.29158	0.105605	19.589	27.64	64.993	65.95	0.57925	0.81731	1.92183	1.95013
1700007G11Rik	chr5	1.29119	0.376416	0	6.449	26.893	11.178	0	0.23522	0.98089	0.40769
Slc5a7	chr17	1.29074	0.10859	20.441	26.718	57.149	73.774	0.12392	0.16198	0.34646	0.44725
Samd7	chr3	1.28776	0.375281	3.407	1.843	5.603	22.356	0.03353	0.01813	0.05514	0.22001
4930590J08Rik	chr6	1.2874	0.316956	9.369	4.607	34.737	15.649	0.08666	0.04261	0.32132	0.14475
Frmpd4	chrX	1.28691	0.359726	1.703	7.371	11.206	27.945	0.0059	0.02553	0.03881	0.0968
Ccdc109b	chr3	1.28535	0.263158	9.369	10.135	40.34	22.356	0.22322	0.24147	0.96117	0.53266
Adrb3	chr8	1.28518	0.261989	6.814	13.82	26.893	39.123	0.07655	0.15527	0.30216	0.43956
Iqsec3	chr6	1.284	0.0518136	36.623	44.223	81.801	133.017	0.14754	0.17816	0.32955	0.53588
Siglecf	chr7	1.28321	NA	0	0	5.603	6.707	0	0	0.0701	0.08391
Lyzl4	chr9	1.2825	0.379508	0.852	4.607	21.291	7.825	0.02685	0.14524	0.67128	0.2467
Mir181b-2	chr2	1.2824	0.290661	3.407	22.112	43.702	41.358	1.244	8.07423	15.958	15.1022
Col4a3	chr1	1.27972	0.371636	1.703	4.607	12.326	16.767	0.00621	0.0168	0.04496	0.06116
Trpm6	chr19	1.27964	0.139232	74.949	17.505	112.056	147.548	0.3616	0.08446	0.54063	0.71186
Nhlrc1	chr13	1.2782	0.375003	4.258	1.843	8.964	20.12	0.0583	0.02522	0.12272	0.27543
Ptchd3	chr11	1.2772	NA	0	0	11.206	2.236	0	0	0.10874	0.02169
Xkr7	chr2	1.27717	NA	1.703	2.764	10.085	13.413	0.01973	0.03202	0.11682	0.15538
Serpina1e	chr12	1.27613	NA	0	0	2.241	11.178	0	0	0.05126	0.25566
Lrrc38	chr4	1.27613	NA	0	0	2.241	11.178	0	0	0.03024	0.15085
Slc26a8	chr17	1.27535	0.385137	3.407	0.921	7.844	16.767	0.02912	0.00787	0.06705	0.14331
Klf9	chr19	1.27376	0.0139901	74.097	72.784	138.95	236.971	0.71312	0.70048	1.33726	2.28063
Adcy10	chr1	1.27298	0.367325	3.407	3.685	17.929	12.296	0.02054	0.02222	0.10809	0.07413
Gng4	chr13	1.27225	0.0217963	46.843	65.414	123.262	165.433	0.49563	0.69212	1.30419	1.75039
Sycp1	chr3	1.27176	NA	0	0	4.482	7.825	0	0	0.04095	0.07149
Eci1	chr17	1.27172	0.010175	146.491	142.805	222.992	513.065	4.21661	4.1105	6.41861	14.7681
Slc44a5	chr3	1.27104	0.0266874	143.085	166.759	200.581	599.135	1.09701	1.27852	1.53782	4.59347
Cml2	chr6	1.27091	NA	0	0	0	23.474	0	0	0	0.22474
Chchd10	chr10	1.27009	0.147189	358.563	140.041	579.331	811.515	11.8777	4.63899	19.1909	26.8822
Mpp4	chr1	1.26907	0.332603	5.11	7.371	30.255	14.531	0.05198	0.07498	0.30778	0.14782
Sult1b1	chr5	1.26662	0.367161	6.814	1.843	16.808	19.002	0.08217	0.02222	0.2027	0.22916
Mapkapk3	chr9	1.2666	0.0628857	46.843	29.482	86.283	115.132	0.52238	0.32878	0.96221	1.28393
2410124H12Rik	chr16	1.26653	0.306051	6.814	8.292	20.17	30.18	0.3035	0.36935	0.89845	1.34435
4930431F12Rik	chr5	1.26604	0.0107811	96.241	71.863	163.602	262.68	1.33612	0.99768	2.27129	3.6468
Slc25a31	chr3	1.26567	0.373052	5.962	1.843	21.291	12.296	0.08873	0.02742	0.31687	0.183
Spata22	chr11	1.26221	0.390863	7.665	0	17.929	22.356	0.18894	0	0.44194	0.55106
Herc6	chr6	1.25934	0.158735	26.403	26.718	41.461	106.19	0.15706	0.15894	0.24664	0.6317
1700001C02Rik	chr5	1.25877	NA	0	0.921	2.241	14.531	0	0.04064	0.09885	0.64091
Pced1b	chr15	1.2577	1.68504e-06	210.369	213.747	468.395	563.366	3.00286	3.05108	6.68599	8.04163
4930467K11Rik	chr10	1.25752	NA	0.852	0.921	3.362	13.413	0.03699	0.04002	0.14601	0.58261
Acpp	chr9	1.25389	0.130406	17.886	35.932	77.319	68.185	0.09429	0.18942	0.4076	0.35945
Nr3c1	chr18	1.25119	0.0271302	53.657	42.381	119.9	124.075	0.26624	0.21029	0.59492	0.61564
Ttc21a	chr9	1.25003	0.21505	10.22	22.112	44.822	48.065	0.07675	0.16604	0.33658	0.36093
Cox8c	chr12	1.2473	NA	0	0	3.362	8.942	0	0	0.22178	0.58996
Ces1c	chr8	1.24688	NA	0	1.843	3.362	16.767	0	0.03147	0.05741	0.28632
Abcb11	chr2	1.2461	0.391376	6.814	0.921	21.291	13.413	0.04371	0.00591	0.13659	0.08605
Gm11961	chr11	1.24484	0.391376	0	2.764	1.121	27.945	0	0.05557	0.02253	0.56182
Dscaml1	chr9	1.24387	0.375003	1.703	0	0	32.416	0.00777	0	0	0.14785
Caln1	chr5	1.24315	0.340961	11.924	4.607	14.567	42.476	0.12754	0.04927	0.15581	0.45432
Mt2	chr8	1.24121	0.00117612	452.25	222.96	950.237	699.736	25.5435	12.593	53.6702	39.5217
Mir181a-2	chr2	1.24109	0.263158	13.627	11.056	24.652	49.183	5.63075	4.56831	10.1864	20.3224
D10Bwg1379e	chr10	1.24084	0.0152692	54.508	88.447	171.446	184.435	0.20834	0.33806	0.6553	0.70495
Kctd8	chr5	1.24062	NA	1.703	0.921	8.964	8.942	0.01852	0.01001	0.09744	0.0972
4933401H06Rik	chr3	1.24036	0.3633	8.517	3.685	12.326	32.416	0.28544	0.12351	0.41311	1.08641
Gng3	chr19	1.23853	1.27207e-05	336.419	279.161	602.863	878.582	6.21819	5.15985	11.143	16.2392
Mir7663	chr10	1.23801	NA	1.703	0.921	10.085	7.825	0.87692	0.47431	5.19188	4.02814
G730013B05Rik	chr16	1.23757	0.142384	18.737	32.246	57.149	79.363	0.20495	0.35271	0.6251	0.86808
Ccdc170	chr10	1.23463	0.339847	5.962	7.371	26.893	17.885	0.08704	0.10761	0.39263	0.26111
4932438H23Rik	chr16	1.23462	NA	0	0	0	22.356	0	0	0	0.26157
Trpv6	chr6	1.23378	0.288213	9.369	17.505	60.51	21.238	0.10048	0.18775	0.64899	0.22778
Usp17la	chr7	1.23288	0.188756	40.881	41.46	40.34	186.671	0.48464	0.49149	0.47823	2.21295
Tex19.1	chr11	1.23279	0.362948	8.517	3.685	14.567	29.063	0.1538	0.06655	0.26306	0.52482
Slfn3	chr11	1.2323	NA	2.555	0.921	15.688	5.589	0.04418	0.01593	0.27128	0.09665
C630031E19Rik	chr12	1.23157	0.403021	5.962	0.921	17.929	13.413	0.06124	0.00946	0.18418	0.13779
Gm19299	chr9	1.22987	NA	1.703	0.921	11.206	6.707	0.03728	0.02016	0.24522	0.14677
Wnt3a	chr11	1.22913	0.000424632	131.161	199.927	405.644	391.226	1.49724	2.28222	4.63053	4.46595
Gc	chr5	1.2285	0.383979	13.627	0.921	32.496	23.474	0.23617	0.01597	0.56319	0.40682
Cyp2b10	chr7	1.22711	0.412583	0.852	4.607	21.291	6.707	0.01424	0.07703	0.35602	0.11215
Ogdhl	chr14	1.22543	0.011192	80.059	70.942	152.396	217.969	0.72895	0.64593	1.38758	1.98462
A630001G21Rik	chr1	1.22513	0.181929	20.441	16.584	44.822	55.889	0.33156	0.269	0.72705	0.90657
Bcl11b	chr12	1.22447	0.382997	5.962	11.056	5.603	58.125	0.02363	0.04382	0.02221	0.23038
Ccng1	chr11	1.22388	5.34323e-15	1383.15	1292.62	3540.98	2750.88	12.4565	11.6411	31.8895	24.774
1700108F19Rik	chr14	1.22357	0.411958	11.072	0	14.567	38.005	0.40057	0	0.52703	1.37498
Spink3	chr18	1.22181	0.316054	5385.26	1072.42	8869.25	11163.4	400.748	79.8047	660.01	830.728
Dgkb	chr12	1.22144	0.227456	10.22	25.797	52.666	48.065	0.05789	0.14612	0.29832	0.27226
Hsd17b11	chr5	1.22032	0.00773718	229.958	105.031	396.679	419.171	4.25041	1.94133	7.332	7.74772
Csmd1	chr8	1.21966	NA	2.555	1.843	14.567	7.825	0.00562	0.00405	0.03204	0.01721
Dennd2c	chr3	1.21875	0.24457	11.924	41.46	42.581	108.426	0.07528	0.26175	0.26884	0.68455
Grsf1	chr5	1.21841	1.58747e-24	5564.97	7010.35	14474.3	14900.1	61.5565	77.5444	160.106	164.817
Tfec	chr6	1.21793	0.349647	34.068	5.528	114.297	16.767	0.60137	0.09758	2.01761	0.29597
Gm10471	chr5	1.21769	0.410248	4.258	1.843	14.567	12.296	0.04002	0.01731	0.13688	0.11554
Bai2	chr4	1.21705	0.0882469	49.398	70.021	86.283	217.969	0.2822	0.40001	0.49292	1.24522
Fah	chr7	1.21685	0.00727571	73.246	98.582	183.772	232.5	1.45121	1.95318	3.64105	4.60649
Ttc39a	chr4	1.21671	0.0707221	44.288	33.168	82.922	112.897	0.56907	0.42618	1.06547	1.45063
4833419F23Rik	chr18	1.216	NA	2.555	0.921	21.291	2.236	0.09108	0.03284	0.75891	0.07969
F2rl1	chr13	1.21534	1.777e-05	240.178	366.686	714.919	719.856	2.73672	4.17823	8.14618	8.20243
Sord	chr2	1.21292	0.198436	606.406	209.14	1210.21	1000.42	8.42993	2.90735	16.8236	13.9073
Gm15910	chr10	1.21251	0.0317172	58.767	51.594	112.056	159.844	0.62075	0.54498	1.18363	1.68841
Mug-ps1	chr6	1.21251	NA	0	0.921	4.482	10.06	0	0.00618	0.03006	0.06746
Ddo	chr10	1.20772	0.418901	0.852	6.449	11.206	21.238	0.00892	0.06751	0.1173	0.22231
Ptprt	chr2	1.20759	0.0271302	60.47	48.83	123.262	144.195	0.15599	0.12596	0.31796	0.37196
Prrt3	chr6	1.20726	0.106631	29.809	28.561	66.113	82.716	0.23856	0.22857	0.5291	0.66197
Spt1	chr15	1.20576	NA	0	0	10.085	2.236	0	0	0.4964	0.11004
Rpl3l	chr17	1.20476	NA	0	0	2.241	10.06	0	0	0.04412	0.19807
S100a9	chr3	1.20476	NA	0	0	2.241	10.06	0	0	0.13431	0.6029
Olfr503	chr7	1.20476	NA	0	0	2.241	10.06	0	0	0.07241	0.32502
Dlgap1	chr17	1.20417	0.17119	22.996	21.19	70.595	45.829	0.09045	0.08335	0.27767	0.18026
4930512B01Rik	chr12	1.20343	0.17912	20.441	24.876	76.198	43.594	0.45173	0.54974	1.68394	0.9634
Gm11985	chr11	1.20288	NA	0	0.921	13.447	2.236	0	0.02885	0.42101	0.06999
Pik3ap1	chr19	1.20138	0.333011	7.665	11.977	17.929	42.476	0.09205	0.14383	0.21531	0.51009
Aifm3	chr16	1.19762	0.212364	33.216	12.899	52.666	71.538	0.38705	0.1503	0.61369	0.8336
Bin2	chr15	1.19738	0.320171	41.733	6.449	109.815	34.651	0.66257	0.10239	1.74346	0.55014
Fam129a	chr1	1.19733	0.059657	51.953	35.01	104.212	110.661	0.41419	0.27912	0.83082	0.88224
Ccdc113	chr8	1.19707	NA	0	0	0	21.238	0	0	0	0.52474
Cbx7	chr15	1.19593	0.268745	362.822	113.323	516.579	821.575	3.93841	1.23011	5.60744	8.91816
Fetub	chr16	1.19541	NA	0.852	0	0	24.591	0.01499	0	0	0.43288
Ssmem1	chr6	1.19478	NA	1.703	2.764	6.723	15.649	0.0335	0.05435	0.13221	0.30772
Impg2	chr16	1.19429	0.379582	5.962	7.371	32.496	12.296	0.02709	0.03349	0.14764	0.05586
Tpk1	chr6	1.19394	0.00025062	145.64	128.064	311.516	329.748	1.78516	1.56973	3.81837	4.04184
Wdr27	chr17	1.19378	NA	1.703	0.921	4.482	13.413	0.01939	0.01049	0.05102	0.15267
Hoxa1	chr6	1.19011	3.43848e-24	1336.31	1333.15	2911.22	3202.47	16.9623	16.9222	36.9532	40.6501
Bzrap1	chr11	1.18901	0.331921	14.479	11.977	15.688	63.714	0.0597	0.04939	0.06469	0.26271
Atf7ip2	chr16	1.18889	2.0514e-05	200.148	270.869	556.92	535.421	2.38171	3.22327	6.62719	6.37136
Nanog	chr6	1.18822	1.8292e-06	255.508	266.262	542.352	663.967	3.57887	3.7295	7.59665	9.30009
Otop3	chr11	1.18749	0.412104	2.555	7.371	11.206	25.709	0.03313	0.09557	0.14529	0.33334
Spa17	chr9	1.18748	0.0853188	40.881	35.932	76.198	114.014	1.8606	1.63532	3.46794	5.18904
Rorc	chr3	1.18706	0.242462	26.403	11.056	57.149	44.712	0.24272	0.10164	0.52537	0.41103
Kif27	chr13	1.18682	0.0434716	66.432	45.145	116.538	154.255	0.46755	0.31773	0.82019	1.08564
Sigirr	chr7	1.18658	0.22019	77.504	13.82	138.95	105.072	1.22306	0.21809	2.19271	1.6581
Inhbc	chr10	1.18599	0.425068	8.517	0.921	22.411	15.649	0.1359	0.0147	0.35762	0.24971
Myh4	chr11	1.18461	NA	0	0	4.482	6.707	0	0	0.02332	0.03489
Pdk4	chr6	1.18434	0.413129	5.962	2.764	15.688	16.767	0.05422	0.02514	0.14267	0.15249
6430531B16Rik	chr7	1.18373	0.371636	6.814	6.449	23.532	19.002	0.1843	0.17444	0.6365	0.51399
Samd3	chr10	1.1836	0.0608428	63.025	37.774	109.815	136.37	0.5569	0.33378	0.97033	1.20498
Srd5a2	chr17	1.1824	0.439229	5.11	1.843	2.241	32.416	0.18791	0.06776	0.08241	1.192
1700024G13Rik	chr14	1.18229	NA	0.852	0.921	6.723	7.825	0.0672	0.0727	0.53049	0.61738
Tmem232	chr17	1.18203	NA	0.852	1.843	13.447	4.471	0.01001	0.02165	0.15798	0.05253
Cpa2	chr6	1.18156	0.0252604	72.394	73.706	133.347	215.733	1.71579	1.74688	3.16041	5.11302
Als2cr12	chr1	1.17929	NA	3.407	0	16.808	6.707	0.06788	0	0.33492	0.13364
Prr22	chr17	1.17889	0.0997176	30.661	35.01	73.957	88.305	0.71323	0.8144	1.72037	2.05414
Gm5868	chr5	1.17844	0.439259	0	3.685	17.929	6.707	0	0.08386	0.40799	0.15262
Adck3	chr1	1.17477	0.160004	26.403	23.033	71.716	53.654	0.20342	0.17746	0.55253	0.41337
Pcdhga2	chr18	1.1734	0.0312983	52.805	54.358	133.347	121.839	0.3655	0.37625	0.92298	0.84332
Mctp1	chr13	1.17262	0.4416	3.407	2.764	4.482	23.474	0.02494	0.02024	0.03282	0.17187
Nptx2	chr5	1.17213	0.013408	115.83	70.942	230.836	209.027	1.4259	0.87331	2.84164	2.57316
Herc3	chr6	1.16607	7.98821e-05	344.085	260.734	577.09	807.044	2.28493	1.73143	3.83222	5.35925
Gpr55	chr1	1.16551	NA	0	0	3.362	7.825	0	0	0.0414	0.09636
Amdhd1	chr10	1.16469	0.355694	5.962	14.741	21.291	40.24	0.07733	0.19121	0.27617	0.52197
Ubxn11	chr4	1.16388	0.0883097	44.288	34.089	81.801	108.426	0.88193	0.67883	1.62893	2.15912
Galt	chr4	1.16275	0.005217	148.195	102.267	248.765	331.983	2.0583	1.4204	3.45513	4.61097
Mfsd7c	chr12	1.1626	0.0838796	51.953	35.01	121.021	89.423	0.47497	0.32007	1.10639	0.81752
BC023829	chrX	1.16155	1.67683e-08	404.555	409.067	830.337	1008.25	6.38732	6.45857	13.1098	15.9187
Dcdc2c	chr12	1.16054	0.0546635	659.212	673.487	1072.38	2102.56	14.4362	14.7488	23.4842	46.0443
Zar1	chr5	1.16034	0.441929	0.852	9.213	29.135	11.178	0.02124	0.22981	0.72671	0.27881
Dcx	chrX	1.15942	0.117319	34.068	49.751	72.837	131.899	0.11686	0.17066	0.24984	0.45244
Ptpn5	chr7	1.1589	0.23871	23.847	13.82	56.028	42.476	0.21688	0.12568	0.50955	0.3863
Ccr9	chr9	1.15877	0.446261	1.703	4.607	19.05	7.825	0.01218	0.03294	0.13621	0.05595
H2-M10.4	chr17	1.15794	NA	0	0	0	20.12	0	0	0	0.63438
Fas	chr19	1.1578	NA	1.703	2.764	13.447	7.825	0.0297	0.04819	0.23447	0.13643
Nrxn1	chr17	1.15748	0.0307799	59.619	69.099	175.928	126.31	0.2071	0.24004	0.61114	0.43878
Kcng3	chr17	1.1565	0.299835	10.22	23.033	60.51	30.18	0.09564	0.21553	0.56622	0.28241
2310039L15Rik	chr10	1.15629	0.000379225	287.873	351.024	550.196	905.409	14.0813	17.1703	26.9128	44.288
4933406J10Rik	chr7	1.15595	0.429572	5.11	3.685	14.567	16.767	0.16292	0.11749	0.46443	0.53455
Nptx1	chr11	1.15498	0.096101	44.288	36.853	118.78	77.127	0.26321	0.21902	0.70592	0.45838
Thpo	chr16	1.154	0.151254	80.059	26.718	106.453	157.608	1.00085	0.33402	1.33081	1.97031
S100a3	chr3	1.15163	NA	1.703	2.764	4.482	17.885	0.07513	0.12191	0.19769	0.78882
Pcsk2	chr2	1.15132	0.334092	16.182	9.213	49.305	22.356	0.10714	0.061	0.32645	0.14802
Pilra	chr5	1.15116	0.000489545	132.013	134.513	296.949	308.51	1.60187	1.63221	3.60325	3.74353
Hesx1	chr14	1.15092	0.0156961	133.716	80.155	280.141	215.733	3.69317	2.21384	7.73734	5.95845
Rubie	chr14	1.15077	0.145333	37.475	31.325	59.39	109.543	0.8382	0.70065	1.32838	2.45016
Col19a1	chr1	1.14991	0.446154	3.407	3.685	20.17	7.825	0.01015	0.01098	0.06008	0.02331
Pou2f3	chr9	1.14949	NA	1.703	1.843	2.241	19.002	0.02121	0.02294	0.02791	0.23661
Mia2	chr12	1.1488	0.235728	68.136	15.662	136.709	79.363	1.3143	0.30212	2.63705	1.53088
Spag6	chr16	1.14801	0.449904	1.703	5.528	8.964	20.12	0.02169	0.0704	0.11416	0.25622
Pla2g4f	chr2	1.1475	0.456616	2.555	2.764	16.808	6.707	0.02568	0.02778	0.16891	0.0674
Slc7a7	chr14	1.14578	0.358254	516.127	121.615	800.082	1037.31	6.46773	1.52399	10.026	12.9988
Pak6	chr2	1.14332	0.417407	7.665	6.449	10.085	35.769	0.05741	0.0483	0.07553	0.26789
Nfix	chr8	1.14299	0.384022	11.072	6.449	16.808	35.769	0.05121	0.02983	0.07774	0.16543
Lmcd1	chr6	1.14239	0.459241	2.555	4.607	28.014	3.353	0.04643	0.08372	0.50911	0.06094
Tmem150c	chr5	1.14112	0.190133	32.364	18.426	64.993	61.478	0.32966	0.18769	0.66201	0.62622
Gpr115	chr17	1.13773	0.431681	8.517	2.764	16.808	21.238	0.08729	0.02833	0.17227	0.21767
E130309D14Rik	chr11	1.13759	0.140283	41.733	27.64	68.354	99.483	0.32748	0.21689	0.53637	0.78064
Dtx1	chr5	1.13673	0.304777	16.182	11.056	40.34	32.416	0.13679	0.09346	0.341	0.27402
Dsg2	chr18	1.13622	1.43197e-06	1301.39	794.18	2374.47	2291.47	7.13353	4.35328	13.0156	12.5606
Igsf21	chr4	1.13453	0.161212	41.733	27.64	60.51	108.426	0.65528	0.43399	0.95011	1.70246
Rhox5	chrX	1.13353	0.460151	1039.07	96.739	2984.06	1550.37	40.7878	3.79741	117.137	60.8587
Ggt5	chr10	1.13171	0.463047	3.407	1.843	0	35.769	0.02586	0.01399	0	0.27152
Gzmm	chr10	1.13057	0.420949	5.962	6.449	24.652	14.531	0.13335	0.14425	0.5514	0.32502
Sertm1	chr3	1.13025	0.40711	7.665	9.213	12.326	39.123	0.07803	0.09378	0.12547	0.39824
Sel1l2	chr2	1.1299	NA	0	0	8.964	2.236	0	0	0.12687	0.03164
Rad9b	chr5	1.12971	0.0845725	42.585	56.201	90.766	140.841	0.83949	1.1079	1.78929	2.77646
Olfr541	chr7	1.12897	NA	0	0	2.241	8.942	0	0	0.07495	0.29906
Ceacam18	chr7	1.12851	NA	0	0	11.206	1.118	0	0	0.18167	0.01812
Kcnj9	chr1	1.12731	NA	0	0	1.121	11.178	0	0	0.01076	0.10735
Slamf6	chr1	1.12731	NA	0	0	1.121	11.178	0	0	0.0144	0.14369
4932415M13Rik	chr17	1.12731	NA	0	0	1.121	11.178	0	0	0.01149	0.1146
Zpbp	chr11	1.12691	0.434796	5.962	4.607	20.17	14.531	0.04869	0.03762	0.16474	0.11868
Oat	chr7	1.12687	2.06185e-20	1949.53	1684.18	3854.74	4112.35	28.4092	24.5424	56.1725	59.9265
Ppp1r1a	chr15	1.12619	0.000242069	361.118	434.864	671.217	1099.9	8.75702	10.5453	16.2768	26.6724
Schip1	chr3	1.12521	0.433863	7.665	3.685	20.17	16.767	0.0875	0.04207	0.23025	0.1914
F5	chr1	1.12469	0.0316321	115.83	63.571	212.907	197.849	0.49115	0.26956	0.90278	0.83893
Wdfy4	chr14	1.12432	0.460831	8.517	0.921	17.929	17.885	0.02763	0.00299	0.05816	0.05801
Cntnap4	chr8	1.12401	0.408848	5.11	10.135	28.014	17.885	0.03309	0.06562	0.18139	0.1158
Runx3	chr4	1.12317	0.380724	16.182	9.213	15.688	57.007	0.1306	0.07436	0.12661	0.46009
D030068K23Rik	chr8	1.12289	0.0303924	65.58	58.965	147.914	136.37	0.56009	0.50359	1.26326	1.16467
Lipe	chr7	1.12286	0.145099	36.623	30.404	96.368	63.714	0.35149	0.2918	0.92491	0.6115
Slc35g3	chr11	1.1224	NA	1.703	1.843	21.291	1.118	0.03571	0.03863	0.44633	0.02343
Tnik	chr3	1.12218	0.0161435	180.559	93.054	312.637	307.392	0.77292	0.39834	1.33831	1.31586
Dennd3	chr15	1.12205	0.144027	28.958	37.774	93.007	65.95	0.17161	0.22386	0.55118	0.39084
Cfap69	chr5	1.12013	0.0643991	84.318	67.257	117.659	232.5	0.81598	0.65087	1.13864	2.25001
Sh3gl2	chr4	1.11973	0.0100695	94.538	81.998	211.786	185.553	1.05802	0.91768	2.37021	2.07662
Syngr3	chr17	1.11884	0.327781	12.775	12.899	26.893	41.358	0.20479	0.20677	0.43111	0.66298
Bst2	chr8	1.1179	0.023356	126.051	71.863	219.63	229.147	5.16765	2.94614	9.00409	9.39423
Acnat1	chr4	1.11758	0.00229624	180.559	126.221	318.24	365.517	1.12325	0.78522	1.97975	2.27386
Tmem151a	chr19	1.11754	NA	0	2.764	20.17	2.236	0	0.022	0.16056	0.0178
Olfr1346	chr7	1.11733	NA	0	0	0	19.002	0	0	0	0.63348
Rbp3	chr14	1.11733	NA	1.703	0	7.844	7.825	0.01014	0	0.04669	0.04657
Gm8300	chr12	1.11717	NA	0	0.921	3.362	10.06	0	0.01546	0.05639	0.16876
Klk14	chr7	1.11519	0.35245	27.254	6.449	54.908	36.887	0.67392	0.15947	1.3577	0.91211
Vmn2r55	chr7	1.11354	0.281204	20.441	15.662	33.617	58.125	0.27362	0.20966	0.44999	0.77806
Oprk1	chr1	1.11283	0.188713	22.996	26.718	59.39	60.361	0.15342	0.17826	0.39623	0.4027
Cyb561	chr11	1.1114	0.00822134	90.28	95.818	222.992	192.26	1.14595	1.21625	2.83052	2.44042
Smpdl3a	chr10	1.11103	0.121161	31.513	45.145	80.68	98.365	0.55254	0.79157	1.41465	1.72474
Cpxm2	chr7	1.11042	0.457871	4.258	5.528	8.964	24.591	0.03814	0.04951	0.0803	0.22027
Slc39a4	chr15	1.10959	0.380724	210.369	48.83	327.204	394.58	2.96778	0.68887	4.61605	5.56654
T	chr17	1.10802	0.0837426	885.762	1710.9	2672.54	3299.71	13.5953	26.26	41.02	50.6462
Fam154b	chr7	1.10781	0.375003	17.034	6.449	26.893	38.005	0.19187	0.07264	0.30292	0.42808
Lgals9	chr11	1.10695	0.479286	10.22	0	14.567	29.063	0.20237	0	0.28844	0.57545
4930433N12Rik	chr9	1.10571	0.447477	5.11	11.977	47.064	7.825	0.11612	0.27216	1.06943	0.1778
Adh7	chr3	1.10495	NA	1.703	0	10.085	5.589	0.02573	0	0.15234	0.08442
Kcnj13	chr1	1.10378	0.0664175	54.508	45.145	106.453	120.721	1.2689	1.05093	2.47813	2.81027
Fam83c	chr2	1.10153	0.484682	0	6.449	30.255	4.471	0	0.08666	0.40655	0.06008
Cdhr3	chr12	1.10114	NA	1.703	0	1.121	17.885	0.01811	0	0.01192	0.19019
Sec14l4	chr11	1.10001	0.285109	36.623	12.899	48.184	76.01	0.39092	0.13768	0.51433	0.81134
Sp110	chr1	1.09928	0.466545	11.924	3.685	5.603	48.065	0.18998	0.05872	0.08927	0.7658
Otoa	chr7	1.09902	NA	0	2.764	11.206	7.825	0	0.02379	0.09644	0.06734
Sp5	chr2	1.09901	8.68504e-08	545.936	743.507	1423.11	1363.7	8.1756	11.1343	21.3117	20.422
Cfap126	chr1	1.09841	0.140628	62.174	79.234	86.283	242.56	1.88826	2.40639	2.62049	7.36674
Tmem132d	chr5	1.09776	0.429748	5.962	11.056	13.447	36.887	0.04376	0.08116	0.09871	0.27078
Cdx2	chr5	1.09742	0.103859	508.462	994.107	1953.14	1494.48	7.44401	14.554	28.5945	21.8796
G630071F17Rik	chr18	1.09737	NA	0.852	0.921	12.326	2.236	0.00868	0.00938	0.12555	0.02277
Krtcap3	chr5	1.09736	0.0988201	53.657	132.67	164.723	261.563	1.86394	4.60874	5.72218	9.08623
Gcm1	chr9	1.09631	0.472549	5.11	2.764	15.688	12.296	0.0789	0.04267	0.24221	0.18984
Opcml	chr9	1.0958	0.327137	11.924	30.404	32.496	76.01	0.06249	0.15934	0.17031	0.39836
Trim12a	chr7	1.09561	0.23131	23.847	30.404	43.702	87.188	0.49108	0.62608	0.89993	1.7954
Tex21	chr12	1.0948	0.460831	2.555	0	0	31.298	0.03577	0	0	0.43819
F2	chr2	1.0947	0.316033	66.432	10.135	108.695	86.07	1.04939	0.16009	1.71699	1.3596
Inadl	chr4	1.09419	8.60303e-08	687.317	548.187	1206.85	1456.48	2.45051	1.95446	4.3028	5.19282
Osbpl10	chr9	1.09415	0.272846	17.886	19.348	53.787	38.005	0.30004	0.32456	0.90229	0.63754
Unc5cl	chr17	1.09367	0.488517	3.407	4.607	2.241	31.298	0.03772	0.05101	0.02482	0.34657
Apol7a	chr15	1.09342	0.490447	5.962	0	15.688	13.413	0.07827	0	0.20596	0.1761
Tsix	chrX	1.09323	0.468318	6.814	2.764	20.17	12.296	0.04969	0.02016	0.1471	0.08967
Syndig1	chr2	1.09243	0.417472	13.627	8.292	13.447	49.183	0.20824	0.12671	0.20549	0.75158
Atp10b	chr11	1.09222	0.239469	18.737	24.876	57.149	48.065	0.08517	0.11307	0.25976	0.21847
Cdsn	chr17	1.09205	NA	0	0	5.603	4.471	0	0	0.0657	0.05243
H2-M5	chr17	1.09205	NA	0	0	5.603	4.471	0	0	0.15038	0.12001
Rit2	chr18	1.09205	NA	0	0	5.603	4.471	0	0	0.09764	0.07792
Pmis2	chr7	1.09188	NA	0	0	4.482	5.589	0	0	0.20137	0.25109
Rhox2b	chrX	1.09188	NA	0	0	4.482	5.589	0	0	0.18496	0.23063
Rasgrf1	chr9	1.09169	0.484633	5.962	3.685	3.362	33.534	0.03959	0.02447	0.02232	0.22268
1700112E06Rik	chr14	1.09156	0.425849	6.814	8.292	25.773	17.885	0.23487	0.28583	0.88843	0.61651
Krt35	chr11	1.09151	NA	0	1.843	3.362	13.413	0	0.0336	0.06131	0.24462
Hgd	chr16	1.08938	NA	0.852	0.921	4.482	8.942	0.01566	0.01694	0.08241	0.16441
Apela	chr8	1.08899	5.04157e-08	901.944	1193.11	1983.4	2511.67	29.0504	38.4285	63.8824	80.8974
D930020B18Rik	chr10	1.08768	NA	1.703	0	4.482	11.178	0.01561	0	0.04107	0.10243
Cfap53	chr18	1.08743	0.441929	5.962	8.292	13.447	29.063	0.08882	0.12353	0.20032	0.43295
E130102H24Rik	chr4	1.08665	NA	0.852	1.843	0	24.591	0.03576	0.07736	0	1.03242
Ccr7	chr11	1.08419	0.479587	3.407	4.607	10.085	17.885	0.05417	0.07325	0.16036	0.28437
Proca1	chr11	1.08309	0.428104	9.369	27.64	93.007	12.296	0.19445	0.57368	1.93042	0.25521
Atp1b2	chr11	1.08246	0.00222371	145.64	150.176	277.899	363.281	1.54565	1.59379	2.9493	3.85545
Tmco4	chr4	1.08081	0.169328	47.695	26.718	97.489	74.892	0.45087	0.25257	0.92158	0.70796
Rhbdl3	chr11	1.08067	0.215109	46.843	43.302	52.666	159.844	0.39051	0.36099	0.43905	1.33253
Cyyr1	chr16	1.07974	0.310561	51.953	12.899	56.028	105.072	0.80212	0.19914	0.86503	1.62223
Gm13546	chr2	1.07973	0.497201	9.369	0	19.05	20.12	0.28957	0	0.5888	0.62189
Ubd	chr17	1.0785	NA	0	0	3.362	6.707	0	0	0.11267	0.22477
Fabp1	chr6	1.07641	0.26204	62.174	20.269	134.467	63.714	3.96842	1.29374	8.58279	4.06674
Acaa1b	chr9	1.07627	0.462663	6.814	5.528	26.893	11.178	0.1282	0.10401	0.50602	0.21032
Bst1	chr5	1.07606	0.495585	17.034	0	49.305	15.649	0.22899	0	0.66281	0.21037
1700001L19Rik	chr13	1.07603	0.384022	7.665	16.584	35.858	27.945	0.13314	0.28805	0.62282	0.48538
Kcna2	chr3	1.07591	0.116587	104.758	71.863	113.177	286.154	0.28404	0.19485	0.30687	0.77588
Tuba4a	chr1	1.0757	0.00772637	296.39	156.625	459.431	524.243	4.53368	2.39579	7.0276	8.019
Sptlc3	chr2	1.07549	0.132701	51.953	45.145	143.432	77.127	0.59134	0.51385	1.63257	0.87788
Zic5	chr14	1.07543	0.236374	39.178	35.01	45.943	129.664	0.51629	0.46137	0.60544	1.70872
Gpx6	chr13	1.07521	0.356734	11.072	14.741	29.135	36.887	0.27551	0.36682	0.72498	0.91789
Lin7a	chr10	1.07493	0.225686	27.254	21.19	53.787	60.361	0.12522	0.09736	0.24712	0.27733
H2-Eb2	chr17	1.0748	0.488151	3.407	4.607	19.05	8.942	0.03165	0.0428	0.17699	0.08308
Fam163b	chr2	1.07463	0.0702692	50.25	84.762	134.467	165.433	0.53565	0.90353	1.43338	1.76346
Ptpn3	chr4	1.07312	0.000404008	179.708	171.366	350.736	401.286	0.88608	0.84495	1.72936	1.97861
Arhgap20	chr9	1.07131	0.456553	22.144	14.741	5.603	103.954	0.10927	0.07274	0.02765	0.51297
4930596I21Rik	chr1	1.07103	0.461673	5.962	7.371	11.206	29.063	0.40701	0.50318	0.76499	1.98405
Gm10696	chr3	1.06843	NA	0	0.921	1.121	13.413	0	0.01288	0.01566	0.18746
Skap1	chr11	1.06781	0.478815	4.258	8.292	7.844	32.416	0.06106	0.1189	0.11248	0.46483
Tmem176a	chr6	1.06629	0.00211894	136.271	127.143	280.141	283.918	3.82428	3.5681	7.86181	7.96782
Usp18	chr6	1.06621	0.441195	9.369	6.449	16.808	27.945	0.16612	0.11436	0.29805	0.49552
Slfn4	chr11	1.06611	0.498149	3.407	3.685	7.844	17.885	0.02699	0.0292	0.06214	0.14168
Ugt2b35	chr5	1.06583	NA	0	0.921	7.844	4.471	0	0.00862	0.07336	0.04181
4833427G06Rik	chr9	1.0654	NA	0	0.921	4.482	7.825	0	0.03733	0.18162	0.31705
Phactr3	chr2	1.06397	0.387929	17.886	16.584	17.929	71.538	0.09854	0.09137	0.09878	0.39413
Hp	chr8	1.06383	NA	3.407	1.843	12.326	8.942	0.07954	0.04302	0.28779	0.20879
4831440E17Rik	chr5	1.06373	0.415961	11.924	10.135	16.808	42.476	0.08006	0.06805	0.11286	0.2852
Spata31	chr13	1.06286	NA	1.703	0	12.326	3.353	0.01655	0	0.11973	0.03257
4930550C14Rik	chr9	1.06274	0.443117	5.962	11.977	34.737	15.649	0.15135	0.30406	0.88187	0.39728
Lemd3	chr10	1.06272	0.0176868	158.415	165.838	245.403	454.94	1.04887	1.09801	1.62481	3.01216
Arl14epl	chr18	1.0608	0.508377	5.11	0	15.688	10.06	0.07142	0	0.21925	0.1406
Mapk8ip2	chr15	1.06049	0.0024542	142.233	125.3	281.261	289.507	1.26211	1.11185	2.49578	2.56895
Mir7-1	chr13	1.05927	NA	0	0	1.121	10.06	0	0	0.32583	2.9252
1700013F07Rik	chr3	1.05927	NA	0	0	1.121	10.06	0	0	0.05944	0.53365
Gabrd	chr4	1.05927	NA	0	0	1.121	10.06	0	0	0.01873	0.16813
Gm166	chr7	1.05825	0.141567	34.068	53.437	85.163	110.661	0.42186	0.66171	1.05457	1.37032
Eddm3b	chr14	1.05696	NA	1.703	2.764	15.688	4.471	0.04317	0.07005	0.39762	0.11332
Tff3	chr17	1.05689	0.510468	9.369	0	12.326	26.827	0.64237	0	0.84516	1.83942
Ccno	chr13	1.05616	0.468941	5.11	13.82	10.085	45.829	0.08554	0.23134	0.16882	0.76716
Fank1	chr7	1.05323	0.507868	0.852	7.371	15.688	14.531	0.01355	0.11725	0.24957	0.23117
Dnase1l3	chr14	1.0524	0.513344	4.258	1.843	3.362	22.356	0.03615	0.01564	0.02854	0.18979
Fam57b	chr7	1.05223	0.0594505	106.462	67.257	151.276	226.911	1.05732	0.66796	1.5024	2.25357
Lgi3	chr14	1.04914	NA	0	0	7.844	2.236	0	0	0.07744	0.02207
D930028M14Rik	chr7	1.04914	NA	0	0	7.844	2.236	0	0	0.22935	0.06537
Bfsp2	chr9	1.0483	NA	0	0	2.241	7.825	0	0	0.04483	0.15651
Aqp11	chr7	1.04787	0.0628857	183.966	78.312	259.97	309.628	4.37001	1.86027	6.17545	7.35503
Abcc2	chr19	1.04613	0.502284	287.021	30.404	580.451	470.589	1.67256	0.17717	3.38247	2.74227
Zfp385b	chr2	1.04572	0.095961	48.547	49.751	96.368	118.486	0.4162	0.42653	0.82618	1.01579
Ifitm7	chr16	1.04565	NA	1.703	1.843	3.362	14.531	0.06184	0.0669	0.12204	0.52755
Igdcc4	chr9	1.04561	0.105279	138.826	128.064	149.035	435.938	0.69978	0.64553	0.75124	2.19742
Tspan8	chr10	1.04514	0.180891	183.114	49.751	333.928	188.906	3.77819	1.02652	6.88992	3.8977
Pcdhgb1	chr18	1.045	0.107151	61.322	47.909	144.553	95.012	0.42813	0.33448	1.00921	0.66334
Hsd17b2	chr8	1.0447	0.27622	70.691	17.505	104.212	101.719	1.73432	0.42947	2.55673	2.49556
F630042J09Rik	chr13	1.04358	0.454272	11.072	5.528	26.893	19.002	0.10989	0.05487	0.26692	0.1886
Foxr2	chrX	1.04294	0.175644	41.733	31.325	68.354	95.012	0.40853	0.30664	0.66913	0.93008
Astn2	chr4	1.04111	0.239778	44.288	20.269	71.716	76.01	0.28789	0.13176	0.46618	0.49409
Gm13247	chr4	1.04092	0.209895	34.068	24.876	67.234	65.95	0.33527	0.24481	0.66166	0.64902
Tm4sf5	chr11	1.04072	0.431503	63.025	3.685	96.368	79.363	2.02996	0.1187	3.10389	2.55617
Ehhadh	chr16	1.03943	0.171519	89.428	37.774	175.928	107.308	0.933	0.3941	1.83546	1.11954
Gm14085	chr2	1.03853	NA	1.703	3.685	7.844	13.413	0.0143	0.03094	0.06586	0.11263
Wdr72	chr9	1.03659	NA	4.258	0.921	5.603	16.767	0.02563	0.00554	0.03372	0.10091
Cyp4f13	chr17	1.03626	0.259327	41.733	21.19	54.908	89.423	0.76596	0.38893	1.00776	1.64126
6330403A02Rik	chr1	1.0344	0.00462744	125.199	122.536	268.935	250.385	0.59961	0.58686	1.28801	1.19917
Fam187b	chr7	1.03425	0.203287	26.403	44.223	68.354	89.423	0.311	0.52092	0.80516	1.05333
Stx11	chr10	1.03349	0.522621	5.11	3.685	31.376	2.236	0.06698	0.0483	0.41123	0.0293
Shb	chr4	1.03309	0.0238089	81.763	107.795	211.786	188.906	0.93572	1.23364	2.42376	2.16192
Gm9	chrX	1.03245	NA	0	0	16.808	0	0	0	0.3174	0
9530036O11Rik	chr5	1.03112	0.46942	9.369	5.528	17.929	23.474	0.10055	0.05933	0.19242	0.25193
Clec10a	chr11	1.03103	NA	0	0	0	16.767	0	0	0	0.35079
Svs1	chr6	1.03103	NA	0	0	0	16.767	0	0	0	0.18961
Naip1	chr13	1.03083	0.523285	16.182	0	48.184	12.296	0.09479	0	0.28225	0.07202
Halr1	chr6	1.03067	0.309636	24.699	17.505	39.22	59.243	1.39503	0.98871	2.21516	3.34609
Dcxr	chr11	1.02972	0.0494906	76.653	62.65	154.638	141.959	2.62216	2.14316	5.28992	4.85621
Entpd8	chr2	1.02889	0.52457	5.11	0	22.411	4.471	0.06959	0	0.3052	0.06089
Cd46	chr1	1.02714	0.469194	8.517	7.371	14.567	29.063	0.2205	0.19082	0.37713	0.7524
Zfp534	chr4	1.02653	0.524241	3.407	2.764	13.447	8.942	0.04776	0.03875	0.18851	0.12537
1110019D14Rik	chr6	1.02642	0.004808	123.496	128.985	273.417	252.62	2.58891	2.70399	5.73179	5.29581
Pabpc6	chr17	1.02624	0.527873	0.852	4.607	19.05	4.471	0.00834	0.04509	0.18648	0.04377
Atp10d	chr5	1.02574	0.0273701	82.614	97.66	208.425	171.022	0.42896	0.50709	1.08221	0.88801
Gpr26	chr7	1.02501	NA	1.703	0	10.085	4.471	0.01911	0	0.11315	0.05016
Mtap7d3	chrX	1.02496	0.00111624	311.72	279.161	486.324	737.741	3.50235	3.13653	5.46412	8.28893
Kcnj10	chr1	1.02462	0.47316	10.22	16.584	8.964	64.832	0.05936	0.09632	0.05207	0.37654
Stk31	chr6	1.02419	0.521734	5.962	1.843	15.688	11.178	0.05782	0.01787	0.15215	0.10841
Olfm3	chr3	1.02412	0.527714	5.962	2.764	2.241	31.298	0.03759	0.01743	0.01413	0.19736
F830016B08Rik	chr18	1.02396	0.0872487	63.025	90.29	124.382	203.438	0.60031	0.85999	1.18472	1.93771
A430090L17Rik	chr13	1.02105	0.297188	24.699	21.19	40.34	64.832	0.21037	0.18049	0.34359	0.55219
Optc	chr1	1.02025	0.485318	5.11	12.899	12.326	38.005	0.07741	0.1954	0.18673	0.57573
Serpinc1	chr1	1.01871	0.391885	57.064	11.056	119.9	45.829	0.82924	0.16066	1.74237	0.66599
Stk33	chr7	1.01784	0.470526	13.627	4.607	26.893	22.356	0.17875	0.06043	0.35278	0.29325
Ypel3	chr7	1.01733	0.00404858	154.157	223.881	366.424	414.7	4.59738	6.67676	10.9278	12.3675
Lrrc19	chr4	1.01684	0.497081	215.479	34.089	420.211	295.096	2.44023	0.38605	4.75876	3.34187
Ccdc106	chr7	1.01656	0.260453	22.144	43.302	58.269	88.305	0.33225	0.64971	0.87427	1.32493
Samd12	chr15	1.01652	0.467235	7.665	8.292	21.291	21.238	0.25772	0.27879	0.71585	0.71407
Gip	chr11	1.01538	NA	0.852	0.921	7.844	4.471	0.04121	0.04458	0.37955	0.21635
AI464131	chr4	1.01511	0.102716	131.161	61.729	169.205	242.56	0.98656	0.46431	1.27272	1.82448
Gstt3	chr10	1.01473	0.0918977	68.987	48.83	121.021	129.664	1.15666	0.8187	2.02908	2.17398
Rhox4d	chrX	1.01226	NA	0	0.921	12.326	1.118	0	0.03812	0.50999	0.04625
Nod2	chr8	1.01129	0.479815	5.962	14.741	13.447	42.476	0.04052	0.10018	0.09138	0.28866
Eci3	chr13	1.00862	0.53783	11.072	0	30.255	12.296	0.25832	0	0.70588	0.28687
Tmc1	chr19	1.00857	NA	0.852	2.764	8.964	7.825	0.00657	0.02131	0.06912	0.06033
2610206C17Rik	chr7	1.00715	0.457315	7.665	11.977	20.17	30.18	0.14019	0.21906	0.36891	0.55199
Dnah6	chr6	1.00707	0.326414	22.996	16.584	43.702	46.947	0.05708	0.04117	0.10848	0.11654
Foxd4	chr19	1.00672	0.077421	146.491	130.828	407.885	175.493	1.96176	1.752	5.46224	2.35014
Oxct1	chr15	1.00645	0.000890065	692.428	641.241	976.01	1747.1	6.24485	5.7832	8.80241	15.7567
Robo3	chr9	1.00637	0.365799	43.436	13.82	42.581	91.659	0.28863	0.09183	0.28295	0.60905
Fgl1	chr8	1.00598	0.065556	79.208	58.965	141.191	148.666	2.22088	1.65329	3.95881	4.1684
Cryl1	chr14	1.0048	0.132548	45.14	44.223	93.007	97.248	1.00535	0.98494	2.07144	2.16589
Ripk2	chr4	1.00472	0.000159561	311.72	307.722	717.16	542.128	5.14943	5.08338	11.847	8.95562
Rasgrp3	chr17	1.00449	0.0232208	2092.61	1744.06	3087.15	4845.61	13.3269	11.1072	19.6607	30.8596
Ubap1l	chr9	1.00435	0.538755	4.258	1.843	7.844	14.531	0.09684	0.0419	0.17837	0.33043
Ankrd33b	chr15	1.00318	0.170529	81.763	36.853	140.07	115.132	0.29856	0.13457	0.51147	0.42041
Igfbp6	chr15	1.0016	0.503631	17.886	2.764	16.808	41.358	0.43574	0.06734	0.4095	1.00759
Dear1	chr3	1.00117	0.502925	7.665	5.528	23.532	13.413	0.4585	0.33066	1.40758	0.80234
Anks1b	chr10	1.00074	0.457027	10.22	9.213	28.014	21.238	0.03123	0.02815	0.08559	0.06489
Grik3	chr4	1.00062	0.00190862	353.453	276.397	515.459	767.921	1.25533	0.98165	1.83071	2.72736
Tbc1d32	chr10	1.00012	0.000122803	292.983	318.778	545.714	693.029	1.27098	1.38288	2.36735	3.00642
Snph	chr2	0.998647	0.0804331	58.767	100.424	160.24	172.14	0.38852	0.66393	1.05939	1.13805
Dnajb3	chr1	0.99862	0.149413	41.733	45.145	100.851	83.834	1.28865	1.394	3.11411	2.58867
Upb1	chr10	0.997582	0.388282	14.479	18.426	49.305	27.945	0.14947	0.19022	0.50899	0.28848
Taf7l	chrX	0.997028	NA	0.852	0.921	3.362	8.942	0.01382	0.01495	0.05456	0.14513
Cxx1b	chrX	0.995598	0.0461057	77.504	83.84	147.914	185.553	1.97556	2.13707	3.7703	4.7297
Tec	chr5	0.992915	0.146568	69.839	43.302	99.73	139.724	0.82419	0.51102	1.17695	1.64893
Gzmc	chr14	0.992911	NA	0	0	4.482	4.471	0	0	0.1507	0.15033
Slc2a7	chr4	0.992911	NA	0	0	4.482	4.471	0	0	0.0892	0.08898
Npw	chr17	0.992314	0.526166	6.814	3.685	20.17	11.178	0.35308	0.19097	1.04523	0.57925
Plekhg6	chr6	0.99129	0.422183	22.996	9.213	30.255	46.947	0.2392	0.09584	0.31471	0.48834
Lrrc46	chr11	0.991216	0.325526	21.292	22.112	58.269	39.123	0.51514	0.53496	1.40975	0.94652
Gpr137c	chr14	0.990985	0.545382	3.407	3.685	5.603	19.002	0.04377	0.04735	0.07199	0.24417
Cd72	chr4	0.990805	NA	0.852	4.607	10.085	11.178	0.0178	0.09625	0.21072	0.23355
Acot13	chr13	0.989862	0.000798939	289.576	222.96	475.118	558.895	13.2561	10.2066	21.7497	25.5848
Zfp518a	chr19	0.989715	5.47986e-21	1917.16	2071.13	4021.7	3916.73	8.80196	9.50886	18.4642	17.9823
Prr18	chr17	0.989713	0.427285	9.369	29.482	30.255	62.596	0.08281	0.26058	0.26741	0.55326
Adam4	chr12	0.989116	0.199655	37.475	33.168	80.68	70.421	0.50508	0.44703	1.0874	0.94912
Sox17	chr1	0.98907	0.000283478	218.885	254.285	490.806	460.529	1.67857	1.95004	3.76385	3.53166
Kcns1	chr2	0.988871	NA	1.703	0.921	3.362	11.178	0.01972	0.01067	0.03893	0.12943
Gdpd4	chr7	0.987898	NA	0	0	8.964	1.118	0	0	0.0923	0.01151
Slc16a13	chr11	0.987709	0.000974139	470.987	300.351	735.089	819.339	5.8507	3.73103	9.13144	10.178
Morc2b	chr17	0.986727	NA	0	0	15.688	0	0	0	0.13279	0
Mtnr1b	chr9	0.986225	NA	2.555	2.764	17.929	3.353	0.0645	0.06977	0.4526	0.08465
Nobox	chr6	0.986116	NA	0	0	5.603	3.353	0	0	0.09295	0.05563
2310030A07Rik	chr1	0.985741	NA	0	0	3.362	5.589	0	0	0.17306	0.28772
Pramef17	chr4	0.985741	NA	0	0	3.362	5.589	0	0	0.0605	0.10058
Iqcf5	chr9	0.985741	NA	0	0	3.362	5.589	0	0	0.19406	0.32263
Irgm1	chr11	0.985444	0.0820127	77.504	57.122	145.673	133.017	1.0929	0.80549	2.05417	1.8757
C130026I21Rik	chr1	0.985337	NA	0	0	0	15.649	0	0	0	0.24933
Sntg2	chr12	0.984187	NA	3.407	0.921	4.482	14.531	0.04578	0.01238	0.06023	0.19526
1700095A21Rik	chr4	0.984111	0.43174	11.072	15.662	24.652	39.123	0.32526	0.46011	0.7242	1.14928
Abcb9	chr5	0.983327	NA	0	1.843	1.121	15.649	0	0.01736	0.01055	0.1474
Fbxl4	chr4	0.979336	0.0173138	106.462	127.143	254.368	217.969	0.88027	1.05126	2.10321	1.80225
Spats1	chr17	0.979152	0.298156	23.847	25.797	47.064	61.478	0.6456	0.69837	1.2741	1.66434
Clps	chr17	0.979042	NA	2.555	1.843	12.326	5.589	0.16243	0.11714	0.78357	0.35529
Gm17644	chr1	0.978794	1.20712e-09	1648.03	1807.63	2975.09	3870.9	16.173	17.7393	29.1962	37.9873
B4galnt3	chr6	0.978059	0.155909	49.398	44.223	84.042	111.779	0.5239	0.46902	0.89132	1.18549
Gm4432	chr17	0.978055	0.166317	70.691	42.381	141.191	96.13	2.37171	1.4219	4.73704	3.22522
Thy1	chr9	0.977579	0.0569853	97.093	201.77	293.587	316.334	1.75738	3.65202	5.31391	5.72563
Oprm1	chr10	0.976887	NA	4.258	0	7.844	13.413	0.0502	0	0.09246	0.15812
Ubash3a	chr17	0.976583	0.55845	4.258	1.843	22.411	2.236	0.04529	0.0196	0.23833	0.02377
Gpr183	chr14	0.975963	0.310725	30.661	19.348	53.787	55.889	0.32728	0.20652	0.57413	0.59657
Ugt1a5	chr1	0.974817	NA	0.852	0	17.929	0	0.00834	0	0.17551	0
Dlgap2	chr8	0.974774	0.406994	16.182	21.19	25.773	60.361	0.1127	0.14758	0.1795	0.42039
Gm7008	chr12	0.974508	0.522675	4.258	9.213	14.567	22.356	0.33349	0.72151	1.1408	1.75074
Slc25a12	chr2	0.974291	0.0371501	101.352	85.683	172.567	206.791	1.0885	0.92022	1.85334	2.22091
Speer8-ps1	chr5	0.974007	0.556462	6.814	0.921	11.206	15.649	0.19087	0.02581	0.31391	0.43839
Bdh1	chr16	0.973709	0.21263	35.771	47.909	68.354	108.426	0.33703	0.45139	0.64403	1.02158
Fam166b	chr4	0.973119	0.560222	0.852	10.135	1.121	43.594	0.01984	0.2361	0.0261	1.01557
Mdh1b	chr1	0.972173	0.521981	8.517	4.607	16.808	19.002	0.15632	0.08455	0.3085	0.34877
B930059L03Rik	chr12	0.970735	0.54745	5.11	3.685	10.085	16.767	0.12288	0.08861	0.2425	0.40317
Dpp7	chr2	0.970635	0.0142948	194.186	141.884	387.715	287.272	3.68466	2.69222	7.35683	5.45094
1700094J05Rik	chr10	0.970239	0.559186	3.407	3.685	20.17	4.471	0.10731	0.11608	0.63532	0.14083
Krt28	chr11	0.968933	NA	1.703	0	7.844	5.589	0.03592	0	0.16543	0.11787
Rnf112	chr11	0.968898	0.510613	9.369	6.449	26.893	14.531	0.09497	0.06537	0.27261	0.1473
Stmn1-rs1	chr9	0.968811	0.302861	34.068	25.797	45.943	83.834	1.09279	0.82749	1.47372	2.68915
Pm20d2	chr4	0.968684	0.00143378	275.949	286.531	460.551	657.26	1.55495	1.61458	2.59517	3.7036
Panx2	chr15	0.968107	0.543393	4.258	6.449	22.411	8.942	0.03919	0.05936	0.20627	0.0823
Trim67	chr8	0.968054	0.52457	15.331	2.764	19.05	30.18	0.05466	0.00985	0.06792	0.1076
Krt1	chr15	0.966617	0.490467	12.775	6.449	24.652	23.474	0.16395	0.08277	0.31637	0.30125
Pqlc2	chr4	0.966547	0.0468243	203.555	111.48	364.183	272.741	3.12277	1.71023	5.58699	4.18416
Vmn2r26	chr6	0.965508	NA	0.852	0	1.121	11.178	0.01042	0	0.0137	0.13669
LOC381967	chr7	0.964381	0.537427	5.11	6.449	11.206	21.238	0.11014	0.139	0.24152	0.45775
Klk13	chr7	0.964338	0.514361	5.11	13.82	34.737	14.531	0.15535	0.42013	1.05602	0.44175
Dppa5a	chr9	0.964031	0.547389	5.11	5.528	7.844	23.474	0.25114	0.27167	0.38549	1.1536
Hcfc1r1	chr17	0.964023	0.00184157	264.877	199.006	437.019	482.885	6.6919	5.02772	11.0409	12.1997
Dnajc12	chr10	0.963545	0.0522062	77.504	112.401	201.701	181.082	1.78307	2.58592	4.64037	4.16599
Adam7	chr14	0.962194	NA	0	0	2.241	6.707	0	0	0.02029	0.06073
1700019N19Rik	chr19	0.962194	NA	0	0	2.241	6.707	0	0	0.07625	0.22818
1810020O05Rik	chr6	0.962194	NA	0	0	2.241	6.707	0	0	0.06722	0.20116
Mobp	chr9	0.96176	0.501194	19.589	11.056	66.113	11.178	0.13855	0.0782	0.46761	0.07906
Snora78	chr17	0.961671	0.322406	22.144	24.876	56.028	45.829	4.42929	4.97568	11.2068	9.16685
Acbd7	chr2	0.960591	0.513311	5.962	10.135	24.652	16.767	0.34995	0.59488	1.44704	0.98418
Eda2r	chrX	0.960437	0.0248458	110.72	103.188	231.956	195.613	0.59773	0.55707	1.25223	1.05603
Lamb3	chr1	0.960121	0.445446	33.216	26.718	19.05	120.721	0.2505	0.2015	0.14366	0.91044
Mocos	chr18	0.959702	NA	3.407	0.921	11.206	6.707	0.0371	0.01003	0.12202	0.07303
2610203C22Rik	chr1	0.95952	NA	2.555	3.685	7.844	13.413	0.06445	0.09296	0.19785	0.33834
Jph4	chr14	0.958946	0.0345853	131.161	129.907	202.822	319.688	0.91755	0.90878	1.41887	2.23642
D630003M21Rik	chr2	0.958209	0.326487	41.733	28.561	43.702	108.426	0.25652	0.17556	0.26862	0.66646
1700048O20Rik	chr9	0.957513	0.000451974	315.127	309.564	526.664	701.972	5.35501	5.26048	8.9497	11.9287
Acot4	chr12	0.957361	0.540176	15.331	2.764	12.326	38.005	0.20707	0.03733	0.16649	0.51332
Trim43b	chr9	0.956439	0.00367222	189.076	174.13	321.601	395.697	2.62495	2.41745	4.4648	5.49347
Gnat2	chr3	0.955883	0.112395	96.241	75.548	125.503	223.558	1.70271	1.33661	2.2204	3.95519
Kng2	chr16	0.954559	NA	1.703	0.921	1.121	14.531	0.02121	0.01147	0.01395	0.18094
Ttyh1	chr7	0.954504	0.0444196	123.496	154.782	209.545	346.515	0.99747	1.25018	1.6925	2.7988
Mthfs	chr9	0.952213	0.338355	19.589	27.64	56.028	45.829	0.80099	1.13018	2.29098	1.87395
Sgk2	chr2	0.951687	0.548158	11.072	6.449	5.603	43.594	0.11021	0.06419	0.05577	0.43391
Snord8	chr14	0.95147	NA	0	0.921	11.206	1.118	0	0.29225	3.55449	0.35457
Gm5148	chr3	0.950462	0.310928	25.551	24.876	52.666	54.772	0.6604	0.64295	1.36124	1.41565
Gm15787	chr5	0.949653	0.503177	16.182	5.528	22.411	31.298	0.36428	0.12444	0.50451	0.70456
F8	chrX	0.948245	0.145333	68.987	48.83	135.588	103.954	0.28851	0.20421	0.56704	0.43475
Fancl	chr11	0.945505	7.63777e-07	465.025	504.885	982.733	897.585	8.19493	8.89736	17.3183	15.8177
Anxa11	chr14	0.945475	0.0764085	72.394	91.211	142.311	184.435	0.94923	1.19596	1.866	2.41832
Teddm1b	chr1	0.945132	0.00732375	215.479	215.59	340.651	505.241	2.67778	2.67916	4.23332	6.27869
Ppfia4	chr1	0.944516	0.0451222	91.983	100.424	168.084	213.498	0.47611	0.51981	0.87002	1.10508
Emb	chr13	0.944417	0.145916	15764.9	8150.94	23475.8	24945.7	188.814	97.6228	281.167	298.772
Sesn2	chr4	0.944356	0.00361881	223.996	235.859	376.509	523.125	2.64942	2.78974	4.45335	6.18753
Rspo1	chr4	0.943831	0.0416583	86.873	108.716	184.893	202.32	1.48751	1.86153	3.1659	3.4643
Cntd1	chr11	0.943542	0.403783	33.216	13.82	39.22	64.832	0.46818	0.19479	0.5528	0.9138
Stard6	chr18	0.943407	0.203139	36.623	44.223	84.042	81.599	0.70731	0.8541	1.62313	1.57594
Chil1	chr1	0.942724	NA	2.555	0	5.603	10.06	0.04751	0	0.10417	0.18705
Rgs7	chr1	0.942513	0.570917	3.407	3.685	11.206	11.178	0.04302	0.04653	0.14149	0.14114
Ly6e	chr15	0.942368	1.21811e-07	1435.96	1332.23	2283.71	3068.33	19.5975	18.1819	31.1673	41.8757
Tmprss2	chr16	0.942217	0.351371	1274.13	458.819	1753.68	1967.31	12.6581	4.5582	17.4222	19.5445
Prss48	chr3	0.942016	0.371025	19.589	24.876	36.979	59.243	0.64822	0.82316	1.22366	1.9604
Shisa6	chr11	0.94183	0.0857764	154.157	119.772	182.652	364.399	0.64659	0.50237	0.76611	1.52843
Rbpms2	chr9	0.941503	2.23047e-15	1469.17	1374.61	2674.78	2803.41	23.5874	22.0693	42.9434	45.0085
Plac1	chrX	0.941165	0.126666	119.237	83.84	270.056	138.606	3.49949	2.46063	7.92585	4.06794
Morc1	chr16	0.940725	0.544838	5.11	9.213	26.893	11.178	0.05262	0.09486	0.2769	0.11509
D430020J02Rik	chr12	0.940587	1.90124e-05	377.301	462.504	816.89	808.161	4.097	5.02219	8.87037	8.77559
Podnl1	chr8	0.940244	NA	0.852	0.921	5.603	5.589	0.01286	0.01391	0.08459	0.08438
Cngb1	chr8	0.939753	NA	2.555	2.764	16.808	3.353	0.012	0.01298	0.07895	0.01575
1700018B24Rik	chr3	0.938956	NA	0	0	14.567	0	0	0	0.13575	0
Rhox2f	chrX	0.938956	NA	0	0	14.567	0	0	0	0.58724	0
Nfib	chr4	0.938081	0.188012	63.025	55.279	84.042	156.49	0.21418	0.18785	0.2856	0.5318
Nanos3	chr8	0.938028	NA	0.852	0.921	16.808	0	0.03664	0.03963	0.72307	0
Fxyd2	chr9	0.937905	0.563079	189.076	21.19	309.275	292.861	5.83838	0.65433	9.54994	9.04308
Olfr316	chr11	0.937596	NA	0	0	0	14.531	0	0	0	0.49547
Gpr160	chr3	0.937457	0.445943	12.775	17.505	26.893	41.358	0.18096	0.24796	0.38094	0.58583
C3	chr17	0.936883	0.522382	18.737	4.607	20.17	38.005	0.11463	0.02818	0.1234	0.23251
Pcdh10	chr3	0.936115	0.46942	20.441	18.426	17.929	71.538	0.05441	0.04905	0.04773	0.19043
Dst	chr1	0.935896	7.39179e-14	4937.27	4774.29	8282.08	10356.3	5.16806	4.99746	8.66922	10.8404
Fam26f	chr10	0.935747	0.461145	9.369	22.112	30.255	41.358	0.27191	0.64176	0.87811	1.20036
Mfsd11	chr11	0.935185	5.05103e-13	1324.38	1363.56	2424.9	2731.88	13.3946	13.7908	24.5249	27.6297
Tll1	chr8	0.935073	0.343516	22.996	31.325	42.581	72.656	0.14654	0.19962	0.27135	0.463
Dlx4	chr11	0.934147	0.579819	2.555	4.607	17.929	5.589	0.04409	0.07949	0.30936	0.09644
Dlgap3	chr4	0.933841	0.392633	15.331	32.246	41.461	61.478	0.11019	0.23178	0.29801	0.44189
Pianp	chr6	0.933758	0.208137	40.881	48.83	75.078	107.308	0.54887	0.65559	1.00799	1.44071
Syna	chr5	0.932993	NA	3.407	0.921	13.447	4.471	0.03666	0.00992	0.14471	0.04812
2410021H03Rik	chr17	0.930732	0.462572	13.627	17.505	22.411	48.065	0.5616	0.72142	0.92361	1.98084
Zfp296	chr7	0.929329	0.540748	9.369	5.528	15.688	22.356	0.19229	0.11346	0.32199	0.45885
Arap2	chr5	0.927366	0.00198716	272.542	212.826	493.047	443.762	1.16256	0.90783	2.10315	1.89291
Gmfg	chr7	0.926709	0.0403129	98.797	97.66	179.29	204.555	2.79257	2.76045	5.06779	5.78193
Gm11127	chr17	0.9263	0.452442	10.22	23.954	40.34	35.769	0.2388	0.55971	0.94257	0.83577
Car5b	chrX	0.925771	0.10907	67.284	105.952	146.794	195.613	0.61262	0.9647	1.33657	1.78107
Scd3	chr19	0.925625	0.0845127	97.093	111.48	153.517	257.091	0.87869	1.00889	1.38932	2.32667
Slc25a45	chr19	0.925494	0.563422	17.886	5.528	58.269	5.589	0.30642	0.09471	0.99828	0.09575
Pdpn	chr4	0.923582	8.1209e-05	835.512	573.063	1306.58	1391.65	14.2675	9.78581	22.3115	23.7642
Fhit	chr14	0.922773	0.457203	11.072	32.246	63.872	32.416	0.35228	1.02598	2.03222	1.03138
Marveld3	chr8	0.922656	0.33674	35.771	25.797	45.943	82.716	0.35049	0.25277	0.45016	0.81048
Snord16a	chr9	0.921864	0.0942251	66.432	71.863	132.226	139.724	22.9252	24.7994	45.6303	48.2175
Spn	chr7	0.921756	0.551277	27.254	2.764	19.05	58.125	0.18229	0.01849	0.12742	0.38878
Nkx6-3	chr8	0.921667	NA	0.852	0.921	3.362	7.825	0.01196	0.01294	0.04721	0.10989
Kcnk3	chr5	0.921576	0.188049	72.394	41.46	115.418	112.897	0.5967	0.34172	0.95132	0.93053
Slc16a11	chr11	0.921089	0.26748	33.216	33.168	64.993	70.421	0.59402	0.59315	1.16229	1.25937
Otop1	chr5	0.92033	0.589274	11.924	0	16.808	23.474	0.11887	0	0.16757	0.23402
4732456N10Rik	chr15	0.919488	0.560321	8.517	5.528	26.893	10.06	0.10555	0.06851	0.33329	0.12467
Lpin3	chr2	0.919287	0.195057	40.881	49.751	91.886	89.423	0.36441	0.44348	0.81906	0.7971
Pnp2	chr14	0.918713	0.533162	12.775	6.449	31.376	15.649	0.32804	0.1656	0.80565	0.40183
Slc45a1	chr4	0.918154	0.540176	10.22	9.213	11.206	36.887	0.12523	0.11289	0.1373	0.45196
Dpp4	chr2	0.917611	0.3533	759.711	292.981	1232.62	968.005	3.7863	1.46018	6.14321	4.82441
Prdm11	chr2	0.917253	0.555912	6.814	11.056	8.964	36.887	0.11442	0.18566	0.15054	0.61945
Krt15	chr11	0.915429	0.429748	20.441	14.741	36.979	39.123	0.3732	0.26914	0.67515	0.71429
Ybx2	chr11	0.915362	0.102133	66.432	71.863	144.553	126.31	1.33388	1.44293	2.90245	2.53617
Prrg4	chr2	0.915357	0.0376188	100.5	117.008	194.978	225.793	1.10894	1.29109	2.15143	2.49145
Fhdc1	chr3	0.915321	0.0219155	224.847	209.14	313.757	523.125	1.16268	1.08146	1.62243	2.70507
Cldn15	chr5	0.914892	NA	3.407	2.764	7.844	12.296	0.0578	0.04689	0.13308	0.2086
Klhl32	chr4	0.914586	0.304302	26.403	44.223	82.922	61.478	0.3475	0.58205	1.09137	0.80915
Gpr75	chr11	0.91356	0.568378	11.924	2.764	14.567	24.591	0.12815	0.0297	0.15656	0.26429
Dydc1	chr14	0.91352	NA	0.852	0.921	11.206	1.118	0.02688	0.02908	0.35366	0.03528
Rph3a	chr5	0.913118	NA	4.258	1.843	16.808	4.471	0.0292	0.01263	0.11525	0.03066
Sema7a	chr9	0.911919	0.247782	37.475	51.594	70.595	108.426	0.35934	0.49473	0.67693	1.03967
Hrh3	chr2	0.911614	0.54643	4.258	23.954	17.929	51.418	0.05094	0.28657	0.21449	0.61513
Dnaaf3	chr7	0.910683	0.219212	53.657	46.066	76.198	122.957	0.76976	0.66086	1.09314	1.76394
Marco	chr1	0.910601	NA	0	0	7.844	1.118	0	0	0.12409	0.01768
Emr1	chr17	0.909594	NA	0	0	1.121	7.825	0	0	0.01084	0.07572
Rims4	chr2	0.909594	NA	0	0	1.121	7.825	0	0	0.0423	0.29533
Spink4	chr4	0.909594	NA	0	0	1.121	7.825	0	0	0.08954	0.62523
Usp17ld	chr7	0.909594	NA	0	0	1.121	7.825	0	0	0.02148	0.15001
4930453L07Rik	chr8	0.909594	NA	0	0	1.121	7.825	0	0	0.02445	0.17075
Mpzl3	chr9	0.909208	0.468503	18.737	14.741	50.425	23.474	0.56852	0.44727	1.52998	0.71222
Tex40	chr19	0.908861	0.588601	5.11	5.528	4.482	26.827	0.20548	0.22227	0.18023	1.07869
Pdx1	chr5	0.905387	NA	3.407	0.921	7.844	8.942	0.08313	0.02248	0.1914	0.2182
Itk	chr11	0.905337	NA	0.852	0	3.362	6.707	0.00573	0	0.0226	0.04509
Ifih1	chr2	0.905206	0.298305	28.958	34.089	63.872	63.714	0.16477	0.19397	0.36344	0.36254
Mzb1	chr18	0.905015	NA	5.11	0.921	14.567	6.707	0.17713	0.03193	0.50493	0.23247
Mid1ip1	chrX	0.904766	3.9117e-05	524.644	433.022	842.663	965.77	8.00174	6.60434	12.8521	14.7297
Glyatl3	chr17	0.904251	0.577956	5.11	8.292	7.844	27.945	0.18382	0.29827	0.28216	1.00522
H2-M10.2	chr17	0.904155	NA	1.703	1.843	8.964	5.589	0.05403	0.05845	0.28436	0.17728
Tex15	chr8	0.903545	0.0580874	166.932	140.962	217.389	375.577	0.62348	0.52649	0.81194	1.40276
Opn4	chr14	0.901915	NA	0.852	0	10.085	1.118	0.00932	0	0.11039	0.01224
Parp10	chr15	0.900794	0.505868	13.627	10.135	23.532	30.18	0.12605	0.09374	0.21767	0.27916
Sgk1	chr10	0.899975	0.0365363	505.055	234.937	668.976	746.683	3.81535	1.7748	5.05367	5.64069
Ptpn6	chr6	0.899599	0.0601041	149.047	101.345	208.425	272.741	1.92616	1.30971	2.69351	3.52468
Ntn5	chr7	0.89879	NA	0.852	2.764	12.326	3.353	0.01207	0.03917	0.17468	0.04752
Rbm47	chr5	0.898458	0.556647	821.033	144.648	1164.26	1194.92	4.75969	0.83855	6.74946	6.92716
Slc7a9	chr7	0.89797	0.587966	109.017	12.899	206.183	128.546	1.72555	0.20416	3.26354	2.03466
Angptl3	chr4	0.897869	0.569705	7.665	6.449	11.206	24.591	0.15007	0.12626	0.21939	0.48145
Ctsc	chr7	0.896254	0.589836	809.11	88.447	1207.97	1264.22	10.2786	1.1236	15.3456	16.0602
Fcrl1	chr3	0.895664	0.568988	22.996	3.685	53.787	13.413	0.35365	0.05668	0.82718	0.20628
Slc39a8	chr3	0.895186	0.141682	1406.15	761.934	2033.82	2170.75	11.2676	6.10546	16.2972	17.3944
Sall4	chr2	0.894624	6.69602e-11	10480.1	12995.3	19742.1	24054.8	64.8749	80.4445	122.209	148.906
Sema6a	chr18	0.893961	1.31068e-23	3461.29	3507.48	6670.71	6299.86	15.7668	15.9772	30.3862	28.697
1700128F08Rik	chr9	0.89342	0.290003	34.068	53.437	66.113	108.426	0.96382	1.5118	1.87043	3.0675
Cfi	chr3	0.892503	0.457203	98.797	17.505	183.772	64.832	1.49665	0.26518	2.78392	0.98212
4933402E13Rik	chrX	0.892234	0.607295	691.576	29.482	1492.59	1077.55	10.7248	0.45721	23.1468	16.7105
AU022754	chr15	0.892181	0.473365	12.775	19.348	28.014	41.358	0.13481	0.20416	0.29561	0.43642
Hepacam2	chr6	0.891059	0.607873	5.962	0.921	17.929	5.589	0.08373	0.01294	0.2518	0.07849
Gm19619	chr5	0.890938	0.327838	34.068	33.168	50.425	84.952	0.37459	0.3647	0.55446	0.9341
Aes	chr10	0.890874	0.0015151	233.364	239.544	416.849	470.589	4.86939	4.99833	8.69799	9.81933
C130060C02Rik	chr19	0.890452	0.507868	12.775	12.899	35.858	21.238	0.34675	0.35009	0.97326	0.57644
Tshb	chr3	0.890414	NA	0	0.921	6.723	3.353	0	0.04486	0.32734	0.16327
Ckmt1	chr2	0.890277	0.571494	19.589	0	68.354	102.837	0.38714	0	1.35088	2.03236
Dhrs11	chr11	0.889637	0.342024	67.284	23.954	97.489	87.188	1.48694	0.52938	2.15446	1.9268
Lad1	chr1	0.889585	7.42505e-05	449.695	468.953	953.599	762.332	4.7199	4.92203	10.0088	8.00127
Akr1c13	chr13	0.889512	0.402685	34.068	18.426	64.993	43.594	0.86838	0.46969	1.65665	1.11119
Lrrc34	chr3	0.889318	0.422178	19.589	23.954	34.737	55.889	0.33433	0.40883	0.59287	0.95387
Unc79	chr12	0.889143	0.404558	22.144	21.19	49.305	40.24	0.0784	0.07502	0.17456	0.14247
Pah	chr10	0.889058	NA	0	0	13.447	0	0	0	0.19705	0
BC049715	chr6	0.888353	0.576492	5.962	8.292	11.206	24.591	0.16409	0.22822	0.30841	0.67682
Spin2c	chrX	0.888236	0.000835194	877.245	1230.89	2357.66	1586.14	21.0938	29.5972	56.6911	38.1395
Tspan17	chr13	0.888191	0.602398	5.962	5.528	3.362	30.18	0.12032	0.11157	0.06785	0.6091
1700019D03Rik	chr1	0.888117	0.165021	73.246	60.807	104.212	155.373	2.75799	2.28963	3.924	5.85039
Slco1a4	chr6	0.888034	NA	2.555	0.921	5.603	8.942	0.02099	0.00757	0.04602	0.07346
Rgs9	chr11	0.887763	0.235758	37.475	56.201	94.127	89.423	0.13796	0.2069	0.34653	0.32921
Hdgfl1	chr13	0.887729	NA	0	0	0	13.413	0	0	0	0.21125
Fam43b	chr4	0.887729	NA	0	0	0	13.413	0	0	0	0.17796
Kcnh4	chr11	0.887221	0.461145	11.924	27.64	42.581	41.358	0.09895	0.22938	0.35338	0.34323
Mir6979	chr18	0.8866	NA	0	0	3.362	4.471	0	0	1.88515	2.50731
Il1b	chr2	0.8866	NA	0	0	3.362	4.471	0	0	0.07955	0.10581
Luzp4	chrX	0.8866	NA	0	0	3.362	4.471	0	0	0.05213	0.06934
Syk	chr13	0.886473	0.101637	82.614	76.47	134.467	169.904	0.4921	0.4555	0.80097	1.01206
Gucy2e	chr11	0.886446	0.361272	21.292	50.673	71.716	73.774	0.08026	0.19101	0.27033	0.27809
Irgm2	chr11	0.886406	0.160969	73.246	55.279	109.815	138.606	0.65457	0.49401	0.98138	1.23867
1700034O15Rik	chr6	0.886065	NA	0	0.921	1.121	10.06	0	0.03905	0.04749	0.42634
Fam228b	chr12	0.885831	0.450703	15.331	20.269	40.34	34.651	0.16682	0.22055	0.43895	0.37705
Btn2a2	chr13	0.88542	0.534115	12.775	8.292	26.893	21.238	0.13449	0.08729	0.28312	0.22358
Ano2	chr6	0.884766	0.610629	11.072	0	8.964	29.063	0.08854	0	0.07169	0.23241
Xkr4	chr1	0.884741	0.413615	27.254	19.348	58.269	38.005	0.23552	0.16719	0.50354	0.32842
Cyp4a31	chr4	0.884311	0.60551	7.665	1.843	20.17	7.825	0.09594	0.02306	0.25246	0.09793
Mzf1	chr7	0.883606	0.476068	11.924	22.112	31.376	41.358	0.1041	0.19305	0.27392	0.36108
Asic1	chr15	0.883372	0.032746	115.83	129.907	216.269	247.031	0.72186	0.80959	1.3478	1.53952
Atp5l	chr9	0.883341	2.28048e-10	4054.92	4580.82	7059.54	8926.66	248.222	280.415	432.151	546.447
Klk7	chr7	0.882958	0.555779	7.665	14.741	13.447	39.123	0.13795	0.26528	0.24199	0.70406
Cdh10	chr15	0.882843	0.243423	65.58	58.043	162.482	79.363	0.60483	0.53532	1.49852	0.73194
Gm16130	chr9	0.882623	NA	4.258	0	10.085	8.942	0.04778	0	0.11315	0.10033
Slc5a1	chr5	0.881927	0.577914	9.369	5.528	24.652	12.296	0.0748	0.04414	0.19684	0.09818
Cyp3a13	chr5	0.881486	NA	2.555	0	8.964	5.589	0.02715	0	0.09527	0.05939
Itpr3	chr17	0.881199	0.0511098	300.648	205.455	344.013	612.548	1.05021	0.71768	1.20169	2.13972
Fam169b	chr7	0.881071	0.217444	63.877	80.155	93.007	186.671	0.71108	0.89229	1.03535	2.07802
5830418P13Rik	chr9	0.880996	NA	0.852	0	2.241	7.825	0.01228	0	0.03231	0.11282
Rho	chr6	0.880337	0.580956	10.22	4.607	23.532	13.413	0.09918	0.0447	0.22836	0.13017
Gm5083	chr13	0.879885	0.603294	5.962	3.685	19.05	7.825	0.1555	0.09612	0.49686	0.20408
Lenep	chr3	0.879748	0.364152	38.326	29.482	90.766	45.829	1.80176	1.38599	4.26698	2.15449
Rab11fip5	chr6	0.879399	0.602381	126.051	12.899	207.304	174.375	0.64638	0.06614	1.06304	0.89418
Tdrp	chr8	0.878477	0.0386122	464.173	234.016	737.33	576.779	5.91824	2.98372	9.401	7.35396
Srrm4	chr5	0.878463	0.0849182	178.856	107.795	225.233	318.57	0.75139	0.45286	0.94623	1.33835
6530411M01Rik	chr17	0.877971	NA	1.703	0.921	6.723	5.589	0.04388	0.02373	0.1732	0.14398
Mir5622	chr2	0.876268	0.577914	5.962	8.292	17.929	16.767	3.12038	4.3399	9.38385	8.77559
Trpc5	chrX	0.875402	0.516131	12.775	27.64	20.17	68.185	0.09649	0.20875	0.15234	0.51497
Pmch	chr10	0.87437	0.60305	2.555	8.292	14.567	14.531	0.10727	0.34812	0.61158	0.61007
Gm19897	chr7	0.874057	0.528839	13.627	11.056	19.05	35.769	0.26432	0.21445	0.3695	0.69381
Hist3h2ba	chr11	0.873866	0.199655	57.915	54.358	126.624	89.423	3.93665	3.69486	8.60694	6.07833
Psg23	chr7	0.873844	0.167399	77.504	53.437	128.865	121.839	1.11698	0.77012	1.85718	1.75592
Tapbpl	chr6	0.873725	0.00128934	264.877	274.554	459.431	539.892	4.01256	4.15915	6.9598	8.17869
9930111J21Rik1	chr11	0.873666	0.288383	41.733	40.538	62.751	98.365	0.33926	0.32955	0.51012	0.79964
Mir6352	chr1	0.873517	0.568938	11.924	5.528	17.929	23.474	3.22798	1.49652	4.85372	6.35474
Cyb5rl	chr4	0.873256	0.301078	36.623	46.066	61.631	100.601	0.71656	0.90133	1.20587	1.96836
Il1r2	chr1	0.872738	0.61623	5.962	1.843	20.17	4.471	0.1393	0.04305	0.47129	0.10447
Gm1653	chr3	0.872382	0.612633	2.555	5.528	15.688	7.825	0.0331	0.07162	0.20324	0.10137
Acer2	chr4	0.872169	2.2605e-06	822.737	728.766	1296.49	1560.43	5.53842	4.90583	8.72758	10.5044
Fam151b	chr13	0.871839	0.54643	11.072	9.213	20.17	25.709	0.25141	0.2092	0.458	0.58377
Rptoros	chr11	0.871722	0.416547	17.886	32.246	45.943	55.889	0.4354	0.78499	1.11842	1.36056
Ifi44	chr3	0.871431	0.427055	20.441	23.954	36.979	53.654	0.22074	0.25868	0.39933	0.57941
Abca15	chr7	0.870725	NA	0	0	5.603	2.236	0	0	0.03298	0.01316
Zmynd10	chr9	0.870718	0.605829	28.958	0.921	13.447	67.067	0.51875	0.0165	0.24089	1.20145
Gm694	chr4	0.8707	NA	0.852	4.607	3.362	16.767	0.02955	0.15985	0.11665	0.58181
Rom1	chr19	0.870622	0.101007	78.356	101.345	151.276	187.789	1.61248	2.08558	3.11309	3.86448
Mir135b	chr1	0.870135	NA	0	0	2.241	5.589	0	0	0.72556	1.8094
4933406F09Rik	chr14	0.870135	NA	0	0	2.241	5.589	0	0	0.05443	0.13574
1700029P11Rik	chr15	0.870135	NA	0	0	2.241	5.589	0	0	0.06873	0.1714
Wfdc10	chr2	0.870135	NA	0	0	2.241	5.589	0	0	0.15333	0.38238
Adh4	chr3	0.870135	NA	0	0	2.241	5.589	0	0	0.05364	0.13377
Ampd1	chr3	0.870135	NA	0	0	2.241	5.589	0	0	0.03005	0.07494
Ms4a7	chr19	0.869865	0.618729	0	8.292	13.447	15.649	0	0.15174	0.24608	0.28638
Cpt1c	chr7	0.869839	0.00463673	231.661	245.072	388.835	494.063	2.60377	2.7545	4.37034	5.55306
Slc34a3	chr2	0.869626	0.60009	13.627	1.843	22.411	17.885	0.20834	0.02817	0.34264	0.27344
Atp1a2	chr1	0.869502	0.196533	51.102	93.975	128.865	148.666	0.25771	0.47392	0.64988	0.74974
Dgkk	chrX	0.869394	2.47155e-06	1315.02	1478.72	2194.06	2938.67	6.04892	6.80195	10.0924	13.5175
3632454L22Rik	chrX	0.868828	0.615275	1.703	8.292	22.411	6.707	0.01022	0.04973	0.13441	0.04022
Gm9961	chr16	0.868565	NA	5.11	0.921	8.964	11.178	0.29718	0.05358	0.52133	0.65004
Osmr	chr15	0.868168	0.518231	10.22	20.269	23.532	42.476	0.06638	0.13165	0.15284	0.27588
Aoc1	chr6	0.867753	0.596118	14.479	2.764	30.255	13.413	0.15815	0.03019	0.33047	0.14651
Cytip	chr2	0.867126	NA	5.11	0	14.567	6.707	0.02798	0	0.07977	0.03672
Olfml2a	chr2	0.866864	0.0324433	119.237	132.67	226.354	242.56	1.55436	1.72947	2.95071	3.16198
Slc37a2	chr9	0.865895	0.497959	18.737	12.899	26.893	40.24	0.13265	0.09131	0.19038	0.28487
Rsph9	chr17	0.865707	0.550982	19.589	9.213	15.688	49.183	0.65304	0.30714	0.52299	1.6396
Antxr1	chr6	0.865324	0.0116931	294.686	283.767	420.211	650.553	1.75801	1.69287	2.50685	3.881
Dnali1	chr4	0.865265	0.587944	11.924	8.292	7.844	41.358	0.1795	0.12483	0.11809	0.62262
D7Ertd143e	chr7	0.864808	0.599351	6.814	5.528	10.085	21.238	0.09586	0.07778	0.14189	0.29881
Tnfrsf12a	chr17	0.864603	0.321051	86.873	31.325	117.659	114.014	2.82705	1.01939	3.8289	3.7103
A830018L16Rik	chr1	0.86369	0.0638336	105.61	166.759	258.85	249.267	0.39992	0.63147	0.9802	0.94391
1700034J05Rik	chr6	0.862731	0.412583	21.292	37.774	43.702	74.892	0.32874	0.5832	0.67472	1.15627
Tmem120b	chr5	0.862434	0.121738	80.911	75.548	164.723	129.664	1.36606	1.27553	2.7811	2.18918
Msantd1	chr5	0.861874	0.526004	11.924	12.899	29.135	24.591	0.13407	0.14503	0.32758	0.2765
Pde9a	chr17	0.86187	0.240016	46.843	106.873	138.95	155.373	0.71271	1.62606	2.11409	2.36397
Greb1l	chr18	0.859941	2.39175e-14	7137.2	6928.35	14016	11573.6	26.6159	25.837	52.2681	43.1599
Bspry	chr4	0.859917	0.233606	68.136	55.279	86.283	149.784	1.22759	0.99596	1.55455	2.69863
Syt17	chr7	0.859417	0.43057	22.144	32.246	36.979	72.656	0.43005	0.62625	0.71815	1.41104
Ffar2	chr7	0.859369	NA	0.852	1.843	4.482	7.825	0.00946	0.02048	0.04981	0.08695
Man2b2	chr5	0.858359	0.00352025	294.686	231.252	498.65	467.236	2.69486	2.11476	4.56008	4.2728
2810459M11Rik	chr1	0.85831	0.587966	173.746	28.561	252.127	230.265	1.63801	0.26926	2.37695	2.17084
Pacsin3	chr2	0.857672	0.237383	67.284	72.784	88.524	178.846	0.92228	0.99768	1.21343	2.4515
Cplx1	chr5	0.857172	0.550656	7.665	15.662	23.532	27.945	0.10982	0.22439	0.33713	0.40035
Gas6	chr8	0.857101	0.140992	234.216	106.873	265.573	375.577	2.83655	1.29433	3.21631	4.54855
Pon1	chr6	0.856855	NA	0.852	2.764	4.482	10.06	0.01768	0.05737	0.09303	0.2088
Nfasc	chr1	0.854276	0.0468243	222.292	161.231	284.623	424.76	0.67258	0.48783	0.86117	1.28518
Slc5a5	chr8	0.853639	0.460831	15.331	27.64	39.22	48.065	0.16442	0.29644	0.42064	0.51551
5830473C10Rik	chr5	0.852963	NA	1.703	0	1.121	12.296	0.02387	0	0.0157	0.1723
Chga	chr12	0.852813	0.182867	69.839	62.65	146.794	102.837	1.16534	1.04539	2.44942	1.71595
Pigz	chr16	0.85115	NA	0.852	0.921	5.603	4.471	0.01225	0.01325	0.08056	0.06429
Padi1	chr4	0.85115	NA	0.852	0.921	5.603	4.471	0.00712	0.0077	0.04684	0.03738
1700001K23Rik	chr19	0.84838	NA	0	1.843	8.964	3.353	0	0.11858	0.57688	0.21579
Cd6	chr19	0.847112	0.630257	11.924	0	11.206	26.827	0.12342	0	0.11598	0.27767
Ccdc28a	chr10	0.846295	0.267995	45.992	73.706	140.07	87.188	1.23867	1.98509	3.77245	2.34818
4921525O09Rik	chr13	0.846203	0.628654	0.852	8.292	11.206	15.649	0.00817	0.07958	0.10755	0.15019
5430402O13Rik	chr6	0.845483	0.627391	5.11	2.764	14.567	7.825	0.15936	0.08619	0.45428	0.24401
Gm20756	chr6	0.845377	NA	0	2.764	2.241	13.413	0	0.05546	0.04497	0.26916
Lrp2	chr2	0.845007	0.158638	3834.33	2169.72	6060	5132.89	7.78502	4.40527	12.3039	10.4215
A930013F10Rik	chr8	0.844941	0.157798	63.025	86.604	128.865	149.784	0.81583	1.12105	1.66809	1.93888
Kcnv2	chr19	0.84473	NA	0.852	1.843	8.964	3.353	0.00527	0.0114	0.05545	0.02074
Zbtb38	chr9	0.84415	0.0684286	206.11	129.907	265.573	353.221	1.58214	0.99719	2.0386	2.7114
Pld4	chr12	0.843555	0.618729	2.555	9.213	14.567	15.649	0.04057	0.14627	0.23128	0.24845
Rasgrp1	chr2	0.842753	0.218826	55.36	50.673	93.007	106.19	0.34055	0.31171	0.57213	0.65323
Oxsm	chr14	0.842272	0.0354506	126.051	155.704	251.006	263.798	1.05502	1.3032	2.10086	2.20793
Cd79b	chr11	0.841848	NA	3.407	0.921	7.844	7.825	0.0893	0.02415	0.20561	0.20511
1700003M07Rik	chr4	0.841504	0.316457	40.881	46.987	62.751	105.072	0.55456	0.63739	0.85123	1.42532
Ntm	chr9	0.841376	0.561656	37.475	10.135	19.05	84.952	0.6509	0.17603	0.33087	1.47554
C730036E19Rik	chr1	0.84114	0.564168	18.737	8.292	17.929	41.358	0.22288	0.09863	0.21327	0.49196
Klk9	chr7	0.840989	0.592769	5.11	12.899	17.929	23.474	0.1088	0.27461	0.38172	0.49976
Spata17	chr1	0.839377	0.575378	12.775	7.371	24.652	20.12	0.24389	0.14071	0.47062	0.3841
Gbp4	chr5	0.839122	NA	0	4.607	2.241	19.002	0	0.03188	0.01551	0.1315
Epcam	chr17	0.839071	4.25016e-08	1613.11	1641.8	2594.1	3251.65	24.5789	25.016	39.5262	49.5452
Kctd4	chr14	0.838752	0.348483	49.398	28.561	82.922	67.067	0.51452	0.29748	0.86369	0.69855
Gm1968	chr16	0.836996	NA	1.703	1.843	6.723	6.707	0.05447	0.05893	0.21501	0.21447
9330182O14Rik	chr15	0.836615	NA	0	0	12.326	0	0	0	0.18855	0
Gdf5	chr2	0.836615	NA	0	0	12.326	0	0	0	0.16721	0
G530011O06Rik	chrX	0.836551	1.44723e-06	805.703	883.548	1642.74	1388.29	10.631	11.6581	21.6755	18.3181
4930528D03Rik	chr13	0.83548	0.434035	27.254	23.954	39.22	61.478	0.69078	0.60714	0.99405	1.55822
Gm5420	chr10	0.835327	NA	0	0	0	12.296	0	0	0	0.17503
1700013G24Rik	chr4	0.835327	NA	0	0	0	12.296	0	0	0	0.37271
Hoxa11os	chr6	0.835128	NA	0	5.528	12.326	8.942	0	0.0944	0.21049	0.1527
Gm17455	chr10	0.835046	0.632847	5.11	2.764	6.723	15.649	0.18725	0.10128	0.24637	0.57343
Irak4	chr15	0.83467	0.103859	108.165	81.998	173.687	175.493	1.20282	0.91183	1.93143	1.95151
6330419J24Rik	chrX	0.834205	0.030184	247.843	452.369	620.792	649.435	2.54018	4.6364	6.36258	6.65616
Fam227b	chr2	0.834132	NA	1.703	1.843	7.844	5.589	0.02879	0.03114	0.13258	0.09446
Tiam2	chr17	0.833652	0.0093555	229.106	188.871	378.75	376.695	1.03328	0.85182	1.70818	1.69891
Hpdl	chr4	0.833469	0.547937	16.182	12.899	19.05	42.476	0.31721	0.25284	0.37342	0.83264
Tubal3	chr13	0.833246	NA	3.407	3.685	10.085	10.06	0.03456	0.03738	0.10229	0.10204
Slc27a5	chr7	0.833102	NA	0.852	0	8.964	1.118	0.01148	0	0.12082	0.01507
Foxo6	chr4	0.832616	0.616112	5.11	7.371	13.447	16.767	0.06348	0.09156	0.16704	0.20828
Cdc42bpg	chr19	0.831362	0.0978436	115.83	156.625	197.219	300.685	0.60685	0.82058	1.03326	1.57533
Efcab12	chr6	0.831085	0.286157	45.14	40.538	84.042	77.127	0.55568	0.49903	1.03458	0.94946
Mab21l1	chr3	0.83097	0.58736	15.331	8.292	39.22	13.413	0.1733	0.09373	0.44335	0.15163
Stoml3	chr3	0.83071	0.61623	3.407	13.82	12.326	29.063	0.12382	0.5023	0.44801	1.05632
Ctsh	chr9	0.830608	0.637262	1750.23	112.401	3035.6	2413.31	33.8652	2.17485	58.7358	46.695
Gad1os	chr2	0.830567	0.555779	11.924	20.269	17.929	50.301	0.4212	0.71599	0.63333	1.77683
Aga	chr8	0.829972	0.00384267	256.36	230.331	457.189	418.053	6.24075	5.6071	11.1297	10.177
Cyfip2	chr11	0.82933	9.85261e-07	708.61	777.596	1395.1	1257.51	3.16585	3.47406	6.23287	5.61817
Mrpl34	chr8	0.828395	0.000201258	767.377	879.863	1242.7	1703.51	37.3037	42.7719	60.4104	82.8111
Apoe	chr7	0.828033	0.599187	7186.6	1294.46	9624.51	9597.34	180.402	32.4943	241.6	240.918
Zfp677	chr17	0.82795	0.167904	68.987	117.929	160.24	183.317	0.74397	1.27176	1.72805	1.97692
Samd15	chr12	0.827832	0.611455	5.11	9.213	16.808	16.767	0.07913	0.14267	0.26028	0.25963
Heatr9	chr11	0.82776	NA	0	0	6.723	1.118	0	0	0.11376	0.01891
Catsperb	chr12	0.82776	NA	0	0	6.723	1.118	0	0	0.05682	0.00945
1700125H20Rik	chr11	0.826847	NA	0	0	1.121	6.707	0	0	0.03609	0.21601
Camkk1	chr11	0.826412	0.502336	32.364	24.876	89.645	25.709	0.29451	0.22636	0.81575	0.23395
Def6	chr17	0.825327	0.388974	44.288	30.404	51.546	91.659	0.6108	0.41931	0.7109	1.26412
Ocstamp	chr2	0.825182	NA	0.852	0	4.482	4.471	0.01367	0	0.07196	0.07178
Ccdc159	chr9	0.824912	0.538987	21.292	13.82	21.291	51.418	0.43278	0.2809	0.43275	1.04512
Serpinb6c	chr13	0.824328	0.587115	7.665	13.82	30.255	16.767	0.18126	0.3268	0.71545	0.39649
Ldhc	chr7	0.823729	0.502336	36.623	12.899	41.461	58.125	0.87792	0.3092	0.9939	1.39338
Wdr31	chr4	0.82339	0.05878	172.894	189.792	252.127	403.522	2.12337	2.3309	3.09645	4.95579
Gcgr	chr11	0.821954	0.571697	14.479	10.135	17.929	34.651	0.23571	0.16499	0.29188	0.56411
Cpeb1	chr7	0.821119	0.628353	11.072	11.056	3.362	51.418	0.11166	0.11149	0.0339	0.51853
1700015F17Rik	chr5	0.821078	NA	3.407	0.921	11.206	4.471	0.15068	0.04075	0.49563	0.19776
4931428L18Rik	chr1	0.820986	0.588601	12.775	9.213	14.567	33.534	0.36672	0.26447	0.41816	0.96259
Fam13c	chr10	0.820871	0.189199	59.619	87.526	143.432	126.31	0.5334	0.78308	1.28326	1.13008
Rell2	chr18	0.820626	NA	3.407	2.764	17.929	2.236	0.06055	0.04912	0.31864	0.03973
Lgals4	chr7	0.820498	NA	0	2.764	3.362	11.178	0	0.06032	0.07336	0.24394
Lrrn2	chr1	0.820424	0.332132	34.068	46.987	68.354	83.834	0.31974	0.44099	0.64153	0.78681
Cdh12	chr15	0.820169	NA	0.852	0.921	7.844	2.236	0.00474	0.00513	0.04368	0.01245
Aim1	chr10	0.819987	0.0885336	166.932	198.084	422.452	238.089	0.70688	0.8388	1.78889	1.0082
Stpg2	chr3	0.819956	NA	2.555	0.921	7.844	5.589	0.02847	0.01027	0.08741	0.06228
4921509C19Rik	chr2	0.819735	NA	0.852	0	5.603	3.353	0.00997	0	0.0656	0.03926
Gm6578	chr6	0.819735	NA	0.852	0	5.603	3.353	0.02735	0	0.17991	0.10768
Nudt6	chr3	0.819723	0.392746	25.551	41.46	69.475	58.125	0.74089	1.20219	2.01454	1.68543
5730435O14Rik	chr10	0.818822	NA	0	0.921	8.964	1.118	0	0.04689	0.45627	0.05689
Tmem125	chr4	0.818667	0.495774	91.131	14.741	113.177	97.248	1.53697	0.24862	1.90877	1.64012
Stxbp3b	chr19	0.818591	0.602139	11.072	6.449	19.05	20.12	0.34528	0.20112	0.59406	0.62745
Atp9a	chr2	0.8185	0.154251	69.839	100.424	150.155	159.844	0.56279	0.80925	1.21	1.28808
1700023L04Rik	chr6	0.818244	NA	1.703	0	5.603	5.589	0.0808	0	0.26578	0.26512
9230105E05Rik	chr10	0.817844	0.175478	63.025	86.604	142.311	130.781	0.87965	1.20874	1.98625	1.82532
Grin3b	chr10	0.815723	0.439229	29.809	45.145	42.581	101.719	0.28592	0.43302	0.40843	0.97566
A2m	chr6	0.814508	0.461145	26.403	24.876	35.858	63.714	0.17751	0.16724	0.24108	0.42835
Unc5d	chr8	0.813153	0.577817	13.627	23.954	14.567	64.832	0.04641	0.08159	0.04962	0.22082
Cntn2	chr1	0.812957	0.523285	16.182	34.089	28.014	72.656	0.0533	0.11227	0.09226	0.23929
Setd4	chr16	0.812539	0.0853188	105.61	107.795	174.808	209.027	1.81727	1.85486	3.00797	3.59679
Tex13	chrX	0.811953	0.644421	5.11	3.685	16.808	6.707	0.07584	0.05469	0.24945	0.09953
Agtrap	chr4	0.811725	0.0320605	396.038	384.192	495.289	897.585	3.08685	2.99452	3.86045	6.99607
Htr1b	chr9	0.811241	NA	2.555	0.921	8.964	4.471	0.06911	0.02492	0.24248	0.12094
Clic6	chr16	0.811236	0.578106	2078.99	486.458	2872	2538.5	17.4425	4.08133	24.0958	21.2977
Pcdhga4	chr18	0.811048	0.461426	34.068	20.269	63.872	41.358	0.23596	0.14039	0.44239	0.28645
Ltb4r2	chr14	0.810373	NA	0	0.921	4.482	4.471	0	0.02011	0.09782	0.09757
Pcsk1	chr13	0.810225	0.133713	91.131	77.391	153.517	150.902	1.13745	0.96595	1.91612	1.88347
Awat2	chrX	0.809281	0.513344	20.441	15.662	39.22	32.416	0.30207	0.23146	0.57959	0.47904
Gm10046	chr7	0.809073	0.350356	47.695	33.168	85.163	65.95	2.36991	1.64806	4.23164	3.27696
Tbx6	chr7	0.809055	0.0320845	300.648	425.651	502.012	791.395	5.50517	7.7941	9.19234	14.4912
Krt80	chr15	0.80889	NA	1.703	3.685	10.085	6.707	0.03015	0.06524	0.17853	0.11872
Aass	chr6	0.808782	0.638574	305.758	46.066	645.444	232.5	2.59439	0.39088	5.47666	1.97279
2900041M22Rik	chr11	0.808573	NA	1.703	3.685	6.723	10.06	0.0398	0.08611	0.1571	0.23506
Mir6948	chr14	0.808573	NA	1.703	3.685	6.723	10.06	0.86278	1.86662	3.40543	5.0955
Hfe	chr13	0.808565	0.608809	7.665	11.056	13.447	27.945	0.13979	0.20162	0.24522	0.50962
Il22ra1	chr4	0.808483	0.633612	184.818	23.954	201.701	304.039	0.99638	0.12914	1.0874	1.63911
Lca5l	chr16	0.806557	0.43057	44.288	22.112	59.39	67.067	0.43874	0.21905	0.58834	0.6644
C920025E04Rik	chr17	0.806544	NA	0.852	3.685	5.603	10.06	0.02075	0.08978	0.1365	0.24509
Ripply1	chrX	0.806484	0.647372	4.258	3.685	12.326	8.942	0.19695	0.17044	0.57008	0.41358
Vstm2l	chr2	0.80647	NA	3.407	3.685	5.603	14.531	0.07849	0.08491	0.12909	0.3348
1810062G17Rik	chr3	0.80622	0.647372	4.258	3.685	8.964	12.296	0.1468	0.12704	0.30902	0.42385
Pemt	chr11	0.805712	0.261625	68.136	75.548	91.886	171.022	1.72974	1.91793	2.33269	4.34168
Slc39a5	chr10	0.805484	0.372128	213.775	48.83	276.779	214.615	3.13119	0.71522	4.05401	3.14349
Btbd8	chr5	0.805145	0.524627	19.589	14.741	36.979	31.298	0.54247	0.40822	1.02403	0.86672
Nsmf	chr2	0.804235	0.0202603	176.301	225.724	358.58	353.221	1.88378	2.41187	3.83145	3.77419
Ccdc103	chr11	0.804112	0.595866	11.072	11.977	14.567	34.651	0.19317	0.20896	0.25415	0.60454
Hipk4	chr7	0.803991	0.536917	12.775	20.269	31.376	34.651	0.16619	0.26368	0.40816	0.45078
1700056E22Rik	chr1	0.803719	0.618729	7.665	8.292	13.447	22.356	0.24893	0.26928	0.43668	0.72601
Il1r1	chr1	0.803096	0.2191	91.983	58.965	152.396	121.839	0.5737	0.36776	0.9505	0.75991
4930470H14Rik	chr17	0.802967	3.67198e-06	1153.19	1134.15	1766.01	2243.4	20.8848	20.5398	31.983	40.6288
Susd3	chr13	0.80259	0.654288	11.072	0	19.05	14.531	0.24247	0	0.41717	0.31822
Fzd5	chr1	0.802424	0.402412	966.673	433.022	1544.13	1084.26	4.39063	1.96678	7.01346	4.92469
Scgb2b23-ps	chr7	0.802364	NA	3.407	2.764	10.085	7.825	0.20733	0.16821	0.61377	0.47619
Stk32c	chr7	0.802282	0.654288	2.555	4.607	3.362	17.885	0.03521	0.06348	0.04632	0.24644
Slc26a10	chr10	0.802155	0.334726	37.475	83.84	118.78	105.072	0.5313	1.18865	1.68401	1.48967
Asb14	chr14	0.801935	0.623966	10.22	5.528	13.447	22.356	0.15276	0.08263	0.20099	0.33415
Epb4.1l3	chr17	0.800767	8.0483e-05	2371.12	1734.85	3154.38	4043.04	18.4082	13.4685	24.4891	31.3882
Muc6	chr7	0.80032	0.46942	28.958	21.19	39.22	57.007	0.11133	0.08147	0.15079	0.21917
Plk3	chr4	0.800093	0.366806	66.432	32.246	80.68	102.837	0.88137	0.42782	1.0704	1.36435
Cdh23	chr10	0.800072	NA	4.258	0	4.482	13.413	0.01188	0	0.01251	0.03743
Aplnr	chr2	0.799748	0.0735778	2907.68	2746.46	3900.68	6154.55	25.6204	24.1998	34.3699	54.2294
Proz	chr8	0.799216	0.606407	30.661	4.607	50.425	25.709	0.40153	0.06033	0.66035	0.33668
Impa2	chr18	0.798432	0.104853	111.572	108.716	168.084	224.676	2.52795	2.46324	3.80838	5.0906
LOC100504608	chr10	0.796822	NA	1.703	0	11.206	1.118	0.07653	0	0.50343	0.05022
Rps6kl1	chr12	0.796098	0.340961	58.767	45.145	68.354	122.957	0.72829	0.55947	0.8471	1.52378
Inpp1	chr1	0.795229	0.222586	85.169	58.043	141.191	117.368	1.50767	1.02748	2.49936	2.07765
Syt9	chr7	0.795223	0.139232	95.39	107.795	150.155	212.38	0.785	0.88709	1.23569	1.74776
Lrriq3	chr3	0.794948	0.646776	7.665	4.607	23.532	6.707	0.09084	0.05459	0.27886	0.07948
2310001H17Rik	chr6	0.794546	NA	0.852	0	13.447	0	0.03478	0	0.54912	0
5430437J10Rik	chr15	0.794223	NA	0	1.843	5.603	5.589	0	0.04963	0.1509	0.15052
Cxcr2	chr1	0.793773	0.000110426	1241.77	1270.5	1814.19	2567.56	12.8149	13.1114	18.7222	26.4969
Anxa4	chr6	0.793578	0.214978	273.394	101.345	335.048	339.808	4.28632	1.58891	5.25294	5.32757
Plg	chr17	0.793036	0.657555	126.051	9.213	249.885	125.192	1.43681	0.10502	2.84836	1.42703
Tnnt3	chr7	0.791758	0.0995669	107.314	128.985	235.318	183.317	3.00625	3.61335	6.59213	5.1354
Apobec3	chr15	0.791341	0.0469436	166.08	173.209	254.368	343.161	2.12098	2.21201	3.24848	4.38244
Celsr3	chr9	0.791014	0.0238089	297.241	205.455	429.175	453.822	0.80838	0.55876	1.16719	1.23422
Ccdc121	chr1	0.790428	NA	1.703	4.607	2.241	17.885	0.02941	0.07953	0.03869	0.30876
Drd4	chr7	0.790412	NA	1.703	2.764	6.723	7.825	0.04004	0.06497	0.15804	0.18392
Liph	chr16	0.790358	0.576492	11.924	15.662	34.737	21.238	0.09701	0.12742	0.28261	0.17278
Nxf2	chrX	0.789765	NA	4.258	0	19.05	1.118	0.05427	0	0.24278	0.01425
Drd5	chr5	0.78937	NA	1.703	0.921	15.688	0	0.01909	0.01033	0.17582	0
Crhr2	chr6	0.78927	NA	1.703	5.528	11.206	8.942	0.01816	0.05895	0.11949	0.09535
Slc25a40	chr5	0.78843	0.0567276	125.199	138.198	227.474	235.853	1.38537	1.52921	2.51707	2.60979
Unc93b1	chr19	0.788262	0.612168	5.962	19.348	34.737	19.002	0.08262	0.26813	0.48141	0.26335
Upp1	chr11	0.788161	0.000798939	340.678	378.664	624.153	627.08	6.98331	7.76196	12.7941	12.8541
Pcdh1	chr18	0.787937	1.84479e-05	1169.38	906.582	1757.04	1846.59	9.41117	7.29619	14.1407	14.8614
Tuba8	chr6	0.787366	0.658742	0	6.449	4.482	19.002	0	0.14143	0.09829	0.41672
Brinp1	chr4	0.786924	0.660451	5.962	1.843	11.206	10.06	0.05582	0.01725	0.10492	0.09419
Clec2i	chr6	0.786862	NA	0.852	1.843	5.603	5.589	0.01112	0.02405	0.07313	0.07295
Olfr94	chr17	0.786751	NA	0	0.921	6.723	2.236	0	0.02492	0.18186	0.06047
Gm17019	chr5	0.786751	NA	0	0.921	6.723	2.236	0	0.02471	0.1803	0.05995
Mrgprf	chr7	0.786751	NA	0	0.921	6.723	2.236	0	0.01442	0.10525	0.035
Hoxb1	chr11	0.784718	0.0155151	808.258	987.658	1119.44	2013.14	12.2205	14.933	16.9255	30.4378
Slfn5	chr11	0.784404	7.3969e-06	1338.01	1419.76	2076.4	2694.99	7.01588	7.44451	10.8876	14.1312
Sh3bgrl2	chr9	0.783958	8.55472e-05	678.8	558.322	1054.45	1088.73	6.09046	5.00948	9.46093	9.76848
Oit1	chr14	0.783778	NA	1.703	0.921	11.206	1.118	0.04276	0.02313	0.28129	0.02806
9530091C08Rik	chr9	0.783681	0.0215	236.771	269.948	374.268	509.712	0.93211	1.06271	1.4734	2.0066
Cym	chr3	0.783609	NA	0.852	3.685	0	21.238	0.02167	0.09378	0	0.54047
Cnga4	chr7	0.783296	NA	0.852	1.843	6.723	4.471	0.01078	0.02333	0.08514	0.05662
Spaca4	chr7	0.783296	NA	0.852	1.843	6.723	4.471	0.03767	0.0815	0.29738	0.19776
Slc5a10	chr11	0.78235	NA	1.703	0.921	7.844	3.353	0.02366	0.0128	0.10895	0.04658
Snord47	chr1	0.781929	0.0412188	148.195	148.333	255.488	262.68	71.5972	71.6639	123.434	126.908
Gm4278	chr14	0.781584	NA	0	0	11.206	0	0	0	0.24169	0
Erv3	chr2	0.781159	NA	1.703	1.843	2.241	11.178	0.01584	0.01713	0.02083	0.10391
Mir28b	chr8	0.780843	0.665989	3.407	4.607	19.05	3.353	1.3373	1.80829	7.47776	1.31634
Tigit	chr16	0.780464	0.564944	13.627	17.505	24.652	36.887	0.44438	0.57084	0.80391	1.20288
Fam186b	chr15	0.780227	NA	0	0	3.362	3.353	0	0	0.03312	0.03304
Fam3b	chr16	0.780227	NA	0	0	3.362	3.353	0	0	0.12405	0.12375
Mir32	chr4	0.780227	NA	0	0	3.362	3.353	0	0	1.50812	1.50439
Gm5893	chr7	0.780227	NA	0	0	3.362	3.353	0	0	0.05615	0.05601
Pcdh11x	chrX	0.780145	0.544421	26.403	38.696	101.971	24.591	0.09441	0.13837	0.36464	0.08794
Scn1a	chr2	0.779922	0.440097	41.733	23.954	59.39	62.596	0.15815	0.09077	0.22506	0.23721
D130017N08Rik	chr5	0.779628	0.175948	79.208	90.29	129.985	169.904	1.45888	1.66299	2.39412	3.12936
Cyp2c44	chr19	0.779502	NA	5.962	0	6.723	14.531	0.08522	0	0.0961	0.20771
Rprml	chr11	0.778882	NA	1.703	0	2.241	8.942	0.0499	0	0.06565	0.26196
Nr5a1	chr2	0.778657	NA	5.11	0	21.291	1.118	0.05445	0	0.22687	0.01191
Slc26a7	chr4	0.777557	NA	0.852	0.921	8.964	1.118	0.01128	0.0122	0.11873	0.0148
Prdm6	chr18	0.77749	0.00682982	371.339	281.003	575.969	554.423	4.48339	3.39272	6.95401	6.69387
Plcxd1	chr5	0.777307	0.201229	81.763	124.379	218.51	146.43	0.72389	1.10119	1.93458	1.29642
Phf11a	chr14	0.777185	NA	1.703	5.528	6.723	13.413	0.03951	0.12821	0.15594	0.3111
Sh2d4b	chr14	0.777161	0.639392	14.479	4.607	30.255	12.296	0.35084	0.11162	0.73311	0.29794
Lace1	chr10	0.775557	0.187238	74.097	87.526	126.624	158.726	0.92595	1.09375	1.58233	1.9835
Fggy	chr4	0.77554	0.107259	177.152	113.323	242.041	267.152	2.05057	1.31173	2.80167	3.09232
Chrna1	chr2	0.775284	0.0610399	126.902	140.962	229.715	236.971	0.92249	1.0247	1.66987	1.72262
1700003E16Rik	chr6	0.774457	0.668121	0.852	6.449	1.121	23.474	0.01305	0.09879	0.01717	0.35959
Iqcg	chr16	0.773976	0.126691	132.013	148.333	188.254	302.921	1.02946	1.15673	1.46805	2.36224
Dennd1c	chr17	0.773667	0.316536	67.284	91.211	91.886	192.26	0.83814	1.13619	1.1446	2.39492
Gadd45b	chr10	0.773452	0.377714	40.881	40.538	60.51	87.188	1.01407	1.00556	1.50097	2.1627
Oxtr	chr6	0.773343	NA	0	3.685	2.241	14.531	0	0.02534	0.01541	0.0999
C130060K24Rik	chr6	0.773088	NA	4.258	2.764	11.206	7.825	0.04529	0.02939	0.11917	0.08321
Dleu7	chr14	0.772994	0.510277	23.847	19.348	43.702	38.005	0.56223	0.45615	1.03032	0.89601
4930563F08Rik	chr5	0.772106	0.668758	5.11	4.607	3.362	22.356	0.3116	0.2809	0.20499	1.3632
Etv4	chr11	0.77199	0.0318569	275.949	446.842	680.181	571.19	3.70964	6.00699	9.14383	7.67864
Tmem89	chr9	0.771784	NA	0	0	4.482	2.236	0	0	0.26163	0.13049
Phyh	chr2	0.77143	0.0203027	392.631	269.948	623.033	523.125	8.36495	5.7512	13.2736	11.1451
Slc9a2	chr1	0.771357	NA	0	0	2.241	4.471	0	0	0.02015	0.0402
Dux	chr10	0.771357	NA	0	0	2.241	4.471	0	0	0.03476	0.06934
A330076C08Rik	chr13	0.771357	NA	0	0	2.241	4.471	0	0	0.03633	0.07249
Eno4	chr19	0.770828	0.388547	52.805	32.246	70.595	83.834	0.64599	0.39448	0.86363	1.02558
Nefl	chr14	0.770777	0.00111624	343.233	352.867	581.572	614.784	5.38664	5.53783	9.1271	9.64832
Chn1os3	chr2	0.7707	0.610243	20.441	10.135	47.064	15.649	0.23713	0.11757	0.54598	0.18154
P2rx4	chr5	0.770268	0.413804	160.97	43.302	227.474	145.313	2.53638	0.68231	3.58427	2.28967
Tbx10	chr19	0.769939	NA	3.407	3.685	16.808	3.353	0.06017	0.06509	0.29687	0.05923
0610038B21Rik	chr8	0.769543	0.455079	26.403	33.168	62.751	46.947	0.5444	0.6839	1.2939	0.96802
Apoc1	chr7	0.769497	0.669228	290.428	22.112	437.019	372.224	16.4628	1.2534	24.7723	21.0994
Clstn3	chr6	0.769467	0.178317	74.097	101.345	152.396	155.373	0.58071	0.79426	1.19435	1.21768
Mylk4	chr13	0.769038	0.609065	16.182	10.135	16.808	36.887	0.09009	0.05642	0.09357	0.20535
Gucy2f	chrX	0.768643	0.584847	16.182	13.82	38.099	21.238	0.05083	0.04341	0.11967	0.06671
Kcnj3	chr2	0.768139	0.458237	48.547	23.033	61.631	70.421	0.908	0.4308	1.15272	1.31712
Rhbdf2	chr11	0.767622	0.119792	107.314	157.546	249.885	211.262	0.85685	1.25794	1.99523	1.68684
Lct	chr1	0.767179	0.559186	17.034	16.584	36.979	27.945	0.08675	0.08446	0.18833	0.14232
Ecm2	chr13	0.766682	0.243736	73.246	70.021	103.092	149.784	0.63964	0.61148	0.90029	1.30804
1810034E14Rik	chr13	0.76597	0.276581	55.36	57.122	106.453	92.776	0.96476	0.99546	1.85516	1.61681
Tyrobp	chr7	0.765752	NA	4.258	1.843	2.241	16.767	0.23627	0.10224	0.12434	0.93027
Stac2	chr11	0.765293	0.634698	5.962	15.662	14.567	31.298	0.0614	0.16132	0.15004	0.32236
D830005E20Rik	chr10	0.764421	0.421087	37.475	43.302	52.666	93.894	0.63819	0.73744	0.89691	1.59902
D630032N06Rik	chr11	0.764394	0.590664	14.479	13.82	21.291	34.651	0.71044	0.67811	1.04469	1.70027
Etfa	chr9	0.764052	5.54455e-06	1331.2	1275.11	1967.71	2477.02	28.5547	27.3516	42.2081	53.1331
Efemp2	chr19	0.763804	0.0312249	334.716	277.318	424.693	629.315	5.70641	4.72786	7.24039	10.7289
Prss12	chr3	0.763562	0.361413	130.309	54.358	118.78	212.38	1.56968	0.65479	1.43079	2.55828
Napb	chr2	0.762877	0.226146	62.174	81.998	124.382	128.546	0.52869	0.69727	1.05768	1.09309
Col14a1	chr15	0.762726	0.483799	41.733	21.19	66.113	50.301	0.20325	0.1032	0.32199	0.24498
Gm5779	chr10	0.762664	NA	3.407	1.843	6.723	8.942	0.11795	0.0638	0.23279	0.30961
Rspo4	chr2	0.762633	0.581926	14.479	14.741	25.773	31.298	0.19177	0.19524	0.34136	0.41454
Rspo3	chr10	0.762577	0.296895	964.118	1684.18	1915.04	2774.35	12.6363	22.0738	25.0997	36.3623
Lgr5	chr10	0.761895	0.0350022	193.335	199.006	296.949	377.813	1.28876	1.32657	1.97945	2.51849
Zap70	chr1	0.76098	0.666888	2.555	9.213	12.326	15.649	0.02949	0.10633	0.14226	0.18061
Acrbp	chr6	0.760711	0.0223282	219.737	189.792	359.701	343.161	3.20357	2.767	5.24411	5.00298
Prelp	chr1	0.76006	NA	3.407	0	1.121	15.649	0.0297	0	0.00977	0.13643
Tfeb	chr17	0.760026	0.565963	113.275	12.899	90.766	152.019	1.25831	0.14328	1.00826	1.68869
Nap1l2	chrX	0.759045	0.231138	65.58	71.863	110.936	129.664	0.79027	0.86598	1.33682	1.5625
Iqgap1	chr7	0.758848	3.20948e-11	2767.16	2578.78	4277.19	4788.61	11.8084	11.0046	18.2522	20.4346
Sez6l2	chr7	0.758703	0.441409	45.14	40.538	49.305	106.19	0.37314	0.3351	0.40756	0.87779
Naip2	chr13	0.758357	0.386411	34.068	49.751	76.198	73.774	0.22045	0.32194	0.49307	0.47739
D730045A05Rik	chr18	0.757734	0.622832	16.182	10.135	14.567	39.123	0.40045	0.2508	0.36049	0.96815
Wdr78	chr4	0.757006	0.161523	120.941	140.962	171.446	282.801	1.0013	1.16707	1.41945	2.34139
Dennd2d	chr3	0.75698	0.60551	16.182	19.348	15.688	54.772	0.11474	0.13718	0.11123	0.38835
D630045M09Rik	chr13	0.756378	0.475874	118.386	31.325	179.29	95.012	2.84663	0.75322	4.31111	2.28461
Gm16551	chr9	0.756091	0.678845	6.814	0	13.447	8.942	0.07904	0	0.15599	0.10374
Pcgf5	chr19	0.755188	0.0875623	272.542	169.523	429.175	331.983	5.6718	3.5279	8.93145	6.90881
Rgs11	chr17	0.75501	0.679462	1.703	6.449	10.085	11.178	0.02667	0.10096	0.15788	0.17499
BC048502	chr15	0.75487	0.653477	7.665	12.899	36.979	7.825	0.33294	0.56024	1.60616	0.33986
Myo3a	chr2	0.754747	NA	0.852	0.921	3.362	5.589	0.01041	0.01126	0.04108	0.06829
Kcnd1	chrX	0.754621	0.376416	57.064	39.617	101.971	70.421	0.91615	0.63604	1.63714	1.1306
Pla2g2c	chr4	0.754255	0.679733	0.852	11.977	6.723	26.827	0.01653	0.23246	0.13049	0.52068
Rbp1	chr9	0.754233	2.40978e-10	4090.69	4848	7244.44	7864.76	48.9004	57.9534	86.6006	94.016
1810014B01Rik	chr10	0.753922	0.0507192	148.195	164.917	276.779	259.327	2.87273	3.19688	5.3653	5.027
Slc15a1	chr14	0.753607	0.46875	37.475	23.954	57.149	54.772	0.37683	0.24087	0.57466	0.55076
Helz2	chr2	0.753191	0.0142948	246.14	217.432	397.8	392.344	0.76463	0.67545	1.23576	1.21881
Slc17a9	chr2	0.752581	0.665989	7.665	4.607	11.206	16.767	0.10957	0.06585	0.16017	0.23966
Prkcg	chr7	0.751646	0.653942	7.665	15.662	42.581	7.825	0.07728	0.1579	0.42928	0.07888
H2afj	chr6	0.751576	0.000110624	587.669	645.847	976.01	1111.08	10.1012	11.1011	16.7761	19.0978
Vsig10	chr5	0.751284	0.369728	58.767	41.46	72.837	105.072	0.45522	0.32116	0.56421	0.81392
Apoc3	chr9	0.750948	0.674306	65.58	0.921	178.169	79.363	2.76065	0.03878	7.50016	3.34084
Slc41a2	chr10	0.750375	0.644695	13.627	5.528	19.05	21.238	0.09757	0.03958	0.13639	0.15206
Catip	chr1	0.75032	0.58353	17.886	14.741	38.099	24.591	0.26733	0.22033	0.56946	0.36756
Mir6385	chr9	0.750038	0.622373	13.627	9.213	21.291	24.591	4.07559	2.75549	6.36761	7.35478
Tmem42	chr9	0.749909	0.203353	80.911	72.784	136.709	129.664	2.43146	2.18725	4.10824	3.89653
Pla2g12b	chr10	0.74976	0.684139	264.877	15.662	532.267	244.796	7.80303	0.4614	15.6801	7.21146
Abcb6	chr1	0.749616	0.0202987	203.555	236.78	366.424	382.284	2.17945	2.53518	3.92327	4.09308
Cd55	chr1	0.749214	0.239578	199.297	92.132	289.105	217.969	2.47767	1.14539	3.59417	2.7098
Morc4	chrX	0.748492	0.397905	1320.98	636.634	2003.57	1477.72	9.40875	4.53446	14.2705	10.5251
Ripk4	chr16	0.748045	0.0154678	298.945	259.813	423.573	525.361	2.64447	2.29831	3.74693	4.64735
Hprt	chrX	0.748043	5.46953e-09	1196.63	1192.19	1982.28	2039.96	27.8564	27.753	46.1454	47.4883
Gpr35	chr1	0.747137	0.515578	23.847	28.561	60.51	35.769	0.16649	0.1994	0.42246	0.24973
E330011O21Rik	chr16	0.746541	NA	2.555	2.764	4.482	11.178	0.08464	0.09156	0.14848	0.37028
Mir665	chr12	0.745472	0.674112	4.258	7.371	8.964	17.885	1.42266	2.46235	2.99485	5.97487
Tmem79	chr3	0.745326	0.378893	54.508	50.673	118.78	67.067	0.73246	0.68091	1.5961	0.90122
Atp6ap1l	chr13	0.745218	0.678016	7.665	4.607	23.532	5.589	0.20469	0.12301	0.62838	0.14924
Gm4566	chr17	0.74499	NA	3.407	0.921	11.206	3.353	0.2011	0.05438	0.66146	0.19795
9630028B13Rik	chr1	0.744265	0.622832	9.369	16.584	19.05	32.416	0.08638	0.1529	0.17564	0.29887
Kcns2	chr15	0.74408	NA	5.11	0	20.17	1.118	0.02873	0	0.11339	0.00628
Nr1h4	chr10	0.743648	0.66648	11.072	4.607	10.085	24.591	0.14859	0.06182	0.13534	0.33002
Ttc16	chr2	0.743231	0.563825	21.292	15.662	34.737	34.651	0.17522	0.12889	0.28587	0.28516
Ces2g	chr8	0.742856	NA	2.555	0	4.482	7.825	0.02807	0	0.04923	0.08594
Krt33b	chr11	0.742819	NA	1.703	0.921	14.567	0	0.03383	0.0183	0.28935	0
Aim1l	chr4	0.742319	0.277923	63.877	59.886	98.609	116.25	0.42133	0.39501	0.65042	0.76678
Dmgdh	chr13	0.741922	0.493289	25.551	59.886	98.609	55.889	0.26935	0.63129	1.0395	0.58916
Wisp3	chr10	0.741703	0.495519	26.403	26.718	44.822	51.418	0.58472	0.59171	0.99265	1.13872
Ldoc1	chrX	0.741586	0.476003	86.873	65.414	218.51	55.889	2.04352	1.53874	5.14003	1.31469
Col4a4	chr1	0.741495	NA	4.258	2.764	4.482	14.531	0.01713	0.01112	0.01803	0.05844
2310034G01Rik	chr19	0.741342	0.656599	6.814	13.82	33.617	10.06	0.27153	0.55075	1.3397	0.40092
Alox5	chr6	0.741052	0.608199	14.479	13.82	21.291	33.534	0.16084	0.15352	0.2365	0.3725
Tc2n	chr12	0.740777	0.11745	155.86	160.31	211.786	327.512	0.80608	0.8291	1.09532	1.69384
Chrna4	chr2	0.74017	0.0852342	141.381	131.749	249.885	214.615	1.00064	0.93247	1.76859	1.51897
Lhpp	chr7	0.74017	0.000217083	993.927	1296.3	2076.4	1768.34	19.423	25.3318	40.5763	34.5563
Gm5134	chr10	0.740106	NA	1.703	1.843	8.964	3.353	0.01886	0.0204	0.09926	0.03713
Rtn4r	chr16	0.739386	0.647372	11.072	7.371	16.808	21.238	0.18554	0.12351	0.28167	0.35589
Tbc1d10c	chr19	0.738885	0.683325	9.369	2.764	6.723	22.356	0.16726	0.04935	0.12003	0.39912
Tldc2	chr2	0.738667	0.691166	3.407	3.685	20.17	1.118	0.16742	0.18111	0.99125	0.05493
Mir6353	chr1	0.738612	NA	0	0	5.603	1.118	0	0	1.55705	0.31064
Taar7e	chr10	0.738612	NA	0	0	5.603	1.118	0	0	0.16337	0.03259
Gm884	chr11	0.738612	NA	0	0	5.603	1.118	0	0	0.03845	0.00767
Tmigd1	chr11	0.738612	NA	0	0	5.603	1.118	0	0	0.1288	0.0257
Esp8	chr17	0.738612	NA	0	0	5.603	1.118	0	0	0.19528	0.03896
Lrrc43	chr5	0.738612	NA	0	0	5.603	1.118	0	0	0.086	0.01716
Gm12505	chr4	0.737814	0.689873	5.11	2.764	6.723	13.413	0.21199	0.11466	0.27891	0.55644
Gm11190	chr11	0.737813	NA	0	0	1.121	5.589	0	0	0.01031	0.05141
Cd3g	chr9	0.737813	NA	0	0	1.121	5.589	0	0	0.0344	0.17157
Prss43	chr9	0.737813	NA	0	0	1.121	5.589	0	0	0.01767	0.08811
Gm21284	chr6	0.737475	0.561511	51.953	47.909	28.014	157.608	0.43635	0.40238	0.23529	1.32373
Ccdc153	chr9	0.736954	0.677099	4.258	10.135	7.844	24.591	0.12314	0.29306	0.22682	0.7111
Vsig8	chr1	0.736562	NA	1.703	0	5.603	4.471	0.02847	0	0.09364	0.07473
Trim12c	chr7	0.735511	0.381305	43.436	67.257	116.538	77.127	0.36511	0.56533	0.97958	0.6483
Ndufaf6	chr4	0.735422	0.0140452	292.983	301.273	439.26	560.012	8.50337	8.74397	12.7489	16.2535
Sfmbt2	chr2	0.735262	0.528616	546.788	196.242	639.841	715.385	1.87949	0.67455	2.19934	2.45901
Gm6602	chr3	0.734311	0.552741	20.441	20.269	34.737	40.24	0.33311	0.33032	0.5661	0.65578
4933417O13Rik	chr7	0.73391	NA	0.852	1.843	14.567	0	0.01753	0.03792	0.29978	0
Matk	chr10	0.731911	0.536528	26.403	29.482	32.496	69.303	0.35631	0.39787	0.43854	0.93526
Ttll3	chr6	0.731407	0.265393	76.653	76.47	106.453	156.49	0.60787	0.60642	0.84419	1.24099
Cnga3	chr1	0.73131	0.625178	15.331	11.056	19.05	32.416	0.12563	0.0906	0.15611	0.26565
Ccdc148	chr2	0.731276	0.530845	44.288	20.269	43.702	73.774	0.38209	0.17487	0.37703	0.63647
Tekt5	chr16	0.730994	NA	0	0.921	0	12.296	0	0.01627	0	0.21717
Spock2	chr10	0.730448	0.331103	99.648	145.569	124.382	299.567	0.79931	1.16765	0.99771	2.40292
Atp6v0a4	chr6	0.730187	0.656161	10.22	8.292	24.652	13.413	0.0977	0.07927	0.23567	0.12823
Rp1	chr1	0.730121	NA	2.555	0	3.362	8.942	0.00823	0	0.01083	0.02881
Slc5a12	chr2	0.729806	0.510882	40.03	22.112	64.993	46.947	0.24216	0.13377	0.39318	0.28401
Mir5119	chr11	0.729724	NA	1.703	3.685	11.206	4.471	0.93846	2.03036	6.17359	2.46332
Slc6a20b	chr9	0.72913	0.507134	37.475	26.718	73.957	41.358	0.35802	0.25526	0.70657	0.39513
Ggnbp1	chr17	0.728755	0.441409	40.03	36.853	54.908	80.481	0.70463	0.64871	0.96653	1.41669
Gpat2	chr2	0.72872	0.62377	20.441	21.19	14.567	65.95	0.24426	0.25322	0.17407	0.78807
Mertk	chr2	0.728705	0.0542435	166.08	169.523	300.311	263.798	1.46708	1.4975	2.65282	2.33028
Tfap2e	chr4	0.72841	NA	1.703	0	6.723	3.353	0.02527	0	0.09973	0.04974
Rem2	chr14	0.728178	0.619935	10.22	38.696	25.773	68.185	0.17009	0.64397	0.42891	1.13473
Kif12	chr4	0.728028	0.361207	51.953	50.673	75.078	102.837	0.72512	0.70724	1.04786	1.4353
Gbp3	chr3	0.72796	NA	1.703	0	3.362	6.707	0.018	0	0.03552	0.07087
4930474M22Rik	chr17	0.72786	NA	0.852	0	4.482	3.353	0.04363	0	0.22962	0.17179
Umodl1	chr17	0.72786	NA	0.852	0	4.482	3.353	0.0053	0	0.02791	0.02088
Scn9a	chr2	0.727417	NA	3.407	2.764	1.121	17.885	0.01076	0.00873	0.00354	0.0565
Fbxw17	chr13	0.726857	0.0369748	210.369	196.242	312.637	368.87	3.701	3.45247	5.5002	6.48951
Tap1	chr17	0.726757	0.527714	24.699	23.033	43.702	42.476	0.26293	0.24519	0.46522	0.45217
Coch	chr12	0.7266	0.154174	109.017	163.074	249.885	210.144	1.276	1.90871	2.9248	2.45965
Zfp941	chr7	0.726382	0.0931487	133.716	157.546	224.112	266.034	1.07422	1.26566	1.80043	2.13721
Ldhal6b	chr17	0.726228	0.64241	16.182	9.213	15.688	34.651	0.35168	0.20023	0.34094	0.75306
Mir6364	chr2	0.726205	NA	2.555	0.921	1.121	12.296	1.67163	0.60276	0.73311	8.04429
Rtp3	chr9	0.725499	0.567228	22.996	22.112	54.908	27.945	0.29415	0.28284	0.70236	0.35746
Hnf4a	chr2	0.725233	0.70028	850.843	43.302	1385.02	1016.07	6.1311	0.31203	9.9803	7.32171
Cyp4b1	chr4	0.724849	0.695219	3.407	6.449	16.808	6.707	0.05718	0.10825	0.28212	0.11257
Zcchc18	chrX	0.724708	0.155025	100.5	111.48	164.723	193.378	0.94861	1.05225	1.55481	1.82528
Sntb1	chr15	0.724451	0.558627	35.771	24.876	30.255	80.481	0.52175	0.36283	0.4413	1.17388
Nr3c2	chr8	0.724178	0.640776	18.737	7.371	30.255	21.238	0.14397	0.05663	0.23247	0.16319
Cfhr1	chr1	0.723971	NA	1.703	4.607	3.362	14.531	0.03088	0.08352	0.06095	0.26347
Pinc	chr1	0.723704	NA	0	0	10.085	0	0	0	0.20302	0
A530046M15Rik	chr13	0.723704	NA	0	0	10.085	0	0	0	0.20592	0
Gm13446	chr2	0.723704	NA	0	0	10.085	0	0	0	0.15548	0
Spag16	chr1	0.723522	0.11745	119.237	164.917	239.8	238.089	0.76542	1.05866	1.53936	1.52837
Kcnab3	chr11	0.723069	0.525209	42.585	20.269	49.305	63.714	0.52712	0.25089	0.6103	0.78866
6230400D17Rik	chr14	0.722761	0.439229	33.216	57.122	89.645	68.185	0.95873	1.64874	2.58746	1.96805
Zbtb7b	chr3	0.722612	0.299836	60.47	78.312	135.588	101.719	0.51463	0.66647	1.15391	0.86567
1700029F12Rik	chr13	0.722518	NA	0	0	0	10.06	0	0	0	0.26705
Xdh	chr17	0.722518	NA	0	0	0	10.06	0	0	0	0.06847
Ptprh	chr7	0.722518	NA	0	0	0	10.06	0	0	0	0.07859
Mak	chr13	0.721737	0.517923	25.551	39.617	41.461	74.892	0.22507	0.34898	0.36522	0.65971
Ttc34	chr4	0.721476	0.623966	9.369	25.797	24.652	42.476	0.09194	0.25316	0.24193	0.41684
Henmt1	chr3	0.721377	0.700061	1.703	10.135	5.603	23.474	0.0251	0.14935	0.08257	0.34592
Loxl4	chr19	0.721009	0.48052	27.254	36.853	56.028	57.007	0.15742	0.21286	0.32361	0.32927
Dnajc22	chr15	0.720825	0.348782	137.123	59.886	194.978	144.195	2.94536	1.28633	4.18807	3.09727
Agap2	chr10	0.720427	0.597937	26.403	15.662	53.787	24.591	0.14717	0.0873	0.2998	0.13707
Slc22a4	chr11	0.720407	NA	0.852	3.685	11.206	3.353	0.01183	0.05121	0.15571	0.0466
Sox30	chr11	0.720362	0.694409	4.258	6.449	7.844	16.767	0.04465	0.06762	0.08225	0.1758
Krt13	chr11	0.719464	NA	0	2.764	6.723	5.589	0	0.06606	0.16068	0.13357
Dmrta1	chr4	0.718777	0.325119	77.504	66.335	93.007	153.137	0.59757	0.51145	0.71709	1.18071
Rhov	chr2	0.718506	0.700389	5.11	3.685	14.567	6.707	0.09685	0.06984	0.27608	0.12711
BC025920	chr10	0.718215	0.349417	47.695	58.043	93.007	88.305	0.79248	0.96442	1.54536	1.46724
Pdzd4	chrX	0.717899	0.00726385	420.737	430.258	608.465	802.573	3.32643	3.4017	4.81064	6.34529
Rhox9	chrX	0.717658	NA	0	4.607	2.241	15.649	0	0.16402	0.07979	0.55718
Bid	chr6	0.717557	0.00602009	391.779	386.034	572.607	716.503	6.50619	6.41078	9.50915	11.8988
Atp8b3	chr10	0.717432	0.436217	38.326	58.965	104.212	64.832	0.27286	0.41979	0.74192	0.46156
4930404H11Rik	chr12	0.717248	NA	1.703	1.843	10.085	2.236	0.06974	0.07544	0.41291	0.09153
Fam159a	chr4	0.717183	0.588284	19.589	17.505	40.34	27.945	0.68427	0.61148	1.40914	0.97615
Asap3	chr4	0.717075	0.506797	31.513	50.673	45.943	99.483	0.17729	0.28508	0.25847	0.55968
Cyp4f17	chr17	0.716848	0.489942	25.551	46.987	59.39	68.185	0.47394	0.87157	1.10162	1.26476
S1pr5	chr9	0.716295	0.479237	38.326	59.886	53.787	118.486	0.48239	0.75376	0.67699	1.49132
Cyp2s1	chr7	0.715916	0.561453	93.686	17.505	93.007	108.426	1.1225	0.20974	1.11435	1.29909
BC051142	chr17	0.715814	0.64411	13.627	26.718	64.993	13.413	0.21734	0.42613	1.03656	0.21393
Gdf9	chr11	0.715617	0.705394	4.258	4.607	19.05	3.353	0.07413	0.08019	0.33161	0.05837
Fgfr1	chr8	0.715489	8.204e-06	2588.3	2568.65	3667.6	4829.97	16.1754	16.0526	22.9204	30.1845
Vstm2a	chr11	0.715341	NA	4.258	0	6.723	8.942	0.03685	0	0.05818	0.07738
Npy4r	chr14	0.715341	NA	4.258	0	6.723	8.942	0.07027	0	0.11095	0.14757
Fam198b	chr3	0.715315	0.167695	295.538	184.265	507.615	298.45	1.40047	0.87317	2.40543	1.41426
Pou6f1	chr15	0.715248	0.636945	22.996	14.741	14.567	58.125	0.15785	0.10119	0.09999	0.39898
Hsd3b2	chr3	0.715066	NA	0.852	0	5.603	2.236	0.01486	0	0.09775	0.039
Ggt1	chr10	0.714528	0.530475	43.436	23.033	43.702	74.892	0.6746	0.35772	0.67873	1.16313
Mug1	chr6	0.713907	NA	0	2.764	7.844	4.471	0	0.01864	0.05289	0.03015
Mir6391	chr14	0.71364	NA	0	1.843	4.482	5.589	0	0.5564	1.35344	1.68761
Nt5e	chr9	0.713463	0.26856	81.763	156.625	225.233	177.728	0.71721	1.3739	1.97572	1.55901
1110020A21Rik	chr17	0.712424	0.475856	29.809	36.853	60.51	55.889	0.76731	0.94861	1.55757	1.43862
Pcsk1n	chrX	0.71198	0.367191	57.915	46.066	84.042	93.894	0.82934	0.65966	1.20347	1.34455
Noxred1	chr12	0.711624	0.500168	33.216	28.561	61.631	46.947	0.73874	0.63521	1.37069	1.04412
Mir18	chr14	0.711379	0.701198	5.11	4.607	13.447	8.942	1.67163	1.50691	4.39868	2.9252
Elmod1	chr9	0.711007	0.581478	23.847	37.774	28.014	83.834	0.28748	0.45537	0.33771	1.01062
Folr1	chr7	0.710697	0.679733	532.309	87.526	784.394	505.241	11.8808	1.95352	17.5072	11.2767
Ccnb1ip1	chr14	0.710144	NA	4.258	0	1.121	16.767	0.08868	0	0.02334	0.34916
Cenpo	chr12	0.709797	0.00579057	534.864	582.276	777.67	1063.02	3.8675	4.21032	5.62318	7.68647
A730090N16Rik	chr3	0.709256	0.601001	18.737	16.584	26.893	38.005	0.42546	0.37656	0.61066	0.86296
Gm15133	chr7	0.709055	NA	5.11	0	13.447	4.471	0.19288	0	0.50754	0.16876
Grk1	chr8	0.70898	0.558762	24.699	20.269	39.22	41.358	0.10441	0.08568	0.16579	0.17483
Stim1	chr7	0.708674	0.195909	192.483	108.716	270.056	234.736	1.6772	0.9473	2.35312	2.04536
Mir302a	chr3	0.7086	0.709335	2.555	5.528	5.603	14.531	1.16287	2.51588	2.54996	6.61349
Naprt	chr15	0.708316	0.333931	88.576	80.155	98.609	187.789	1.47174	1.33182	1.63845	3.12021
Nr0b1	chrX	0.708301	NA	0.852	1.843	1.121	10.06	0.01491	0.03225	0.01962	0.1761
Tfpi	chr2	0.708265	0.0368183	955.601	550.03	1382.77	1106.61	7.93892	4.56952	11.4878	9.19347
Snord42b	chr11	0.707177	0.630672	11.924	16.584	21.291	32.416	6.80809	9.46886	12.1563	18.5085
Acadl	chr1	0.706533	0.0180683	249.546	242.308	412.367	397.933	4.0229	3.9062	6.6477	6.41501
Speer4b	chr5	0.705894	NA	0	1.843	6.723	3.353	0	0.02927	0.1068	0.05327
Ntrk2	chr13	0.705485	0.170207	126.902	111.48	227.474	169.904	0.2839	0.2494	0.5089	0.38011
Chd5	chr4	0.704927	0.636945	23.847	9.213	23.532	39.123	0.07895	0.0305	0.0779	0.12952
Gpatch3	chr4	0.70429	0.0852342	152.453	162.153	238.68	281.683	2.39019	2.54226	3.74206	4.41627
Ttll9	chr2	0.704172	0.658862	9.369	14.741	14.567	32.416	0.09427	0.14832	0.14658	0.32617
Kcns3	chr12	0.704024	0.630422	18.737	12.899	39.22	20.12	0.19235	0.13241	0.40263	0.20655
Grip1os2	chr10	0.703958	NA	5.11	1.843	10.085	7.825	0.22196	0.08003	0.43804	0.33986
Trim34a	chr7	0.703854	0.630257	17.886	11.977	33.617	22.356	0.2177	0.14578	0.40918	0.27211
Npl	chr1	0.703698	0.659621	909.61	204.534	1333.47	840.577	20.3598	4.57808	29.8471	18.8147
Ubtfl1	chr9	0.703571	NA	1.703	0.921	3.362	6.707	0.02027	0.01096	0.04	0.07981
Oca2	chr7	0.703243	NA	1.703	4.607	17.929	1.118	0.01714	0.04637	0.18046	0.01125
C330018D20Rik	chr18	0.703107	0.0868637	218.034	170.445	360.821	281.683	2.83755	2.21821	4.69581	3.66589
C230024C17Rik	chr1	0.702929	NA	4.258	2.764	12.326	5.589	0.04008	0.02601	0.116	0.0526
Ltc4s	chr11	0.702588	NA	2.555	1.843	3.362	10.06	0.13646	0.09841	0.17954	0.53728
Kcnj6	chr16	0.702569	NA	2.555	4.607	7.844	10.06	0.01153	0.02079	0.0354	0.0454
9230116L04Rik	chr12	0.702139	0.671604	6.814	12.899	23.532	15.649	0.13381	0.25332	0.46215	0.30734
Tmem150b	chr7	0.702115	0.662204	6.814	18.426	17.929	31.298	0.0626	0.1693	0.16473	0.28756
Stx3	chr19	0.702054	0.00878587	1275.84	843.932	1540.77	1936.01	8.04208	5.31961	9.71206	12.2034
P2ry13	chr3	0.70134	NA	0	0.921	5.603	2.236	0	0.01145	0.06965	0.02779
Mapk4	chr18	0.701286	0.074302	161.822	210.983	312.637	301.803	1.10138	1.43597	2.12784	2.0541
Apoc4	chr7	0.700722	NA	4.258	0	11.206	4.471	0.25817	0	0.67933	0.27106
Ifi27l2b	chr12	0.700488	0.706313	28.958	0.921	54.908	12.296	0.83199	0.02647	1.57757	0.35327
Gm14137	chr2	0.69996	0.701446	12.775	3.685	28.014	7.825	0.13081	0.03773	0.28684	0.08012
Tulp2	chr7	0.699853	0.460831	46.843	33.168	62.751	74.892	0.66293	0.46939	0.88806	1.05987
1110032A03Rik	chr9	0.699826	0.147011	161.822	276.397	319.36	405.757	2.85171	4.87081	5.62794	7.15048
B230208H11Rik	chr10	0.699288	0.215867	91.131	85.683	153.517	140.841	2.42118	2.27643	4.07864	3.74187
Lyplal1	chr1	0.698737	0.00330453	456.508	387.877	683.543	696.383	9.09061	7.72393	13.6116	13.8673
Mybpc2	chr7	0.698346	0.712653	5.11	7.371	3.362	25.709	0.04428	0.06387	0.02913	0.22278
Gldc	chr19	0.697826	0.0133477	1731.49	1013.46	2343.1	2148.39	14.3659	8.40843	19.4402	17.8248
Fam213a	chr14	0.697471	0.000134203	2172.67	1904.37	2845.11	3794.89	44.3912	38.9094	58.1301	77.5358
Pgc	chr17	0.697282	0.706802	12.775	1.843	15.688	16.767	0.28988	0.04181	0.35596	0.38044
Apol6	chr15	0.696943	0.706802	5.11	5.528	11.206	12.296	0.04778	0.05168	0.10476	0.11495
Lrrc55	chr2	0.696424	0.256474	110.72	79.234	178.169	138.606	1.19896	0.858	1.92935	1.50093
Cdk5r2	chr1	0.696051	0.66638	9.369	16.584	13.447	36.887	0.1088	0.1926	0.15617	0.42839
Nfe2l2	chr2	0.695923	3.93925e-05	1566.27	1244.71	2216.47	2355.18	19.9214	15.8315	28.1915	29.9557
Deptor	chr15	0.695552	0.0687442	212.924	293.902	367.544	463.882	0.77087	1.06404	1.33066	1.67944
Pdzk1	chr3	0.694752	0.542308	561.267	211.904	693.628	659.496	7.15618	2.70179	8.84379	8.4086
Bambi-ps1	chr2	0.694097	0.565913	29.809	22.112	34.737	57.007	0.77046	0.57151	0.89784	1.47343
Cldn20	chr17	0.69395	0.720544	5.11	2.764	3.362	16.767	0.24315	0.13151	0.15995	0.79778
Ano7	chr1	0.693761	0.643378	19.589	17.505	15.688	53.654	0.15306	0.13678	0.12258	0.41924
Snora20	chr17	0.693287	NA	0.852	1.843	3.362	6.707	0.43846	0.94861	1.73063	3.45269
Psg29	chr7	0.692684	0.635655	12.775	15.662	26.893	25.709	0.07373	0.0904	0.15522	0.14838
Unc80	chr1	0.692454	0.514134	30.661	51.594	50.425	91.659	0.07115	0.11972	0.11701	0.21269
D330041H03Rik	chr17	0.691854	0.0160569	367.932	381.428	526.664	694.147	7.78592	8.0715	11.1449	14.689
Abcc4	chr14	0.691685	0.0419773	491.428	313.25	664.494	650.553	2.61789	1.66872	3.53984	3.46558
Myom2	chr8	0.691526	NA	5.962	0	6.723	12.296	0.0378	0	0.04263	0.07796
Stra6l	chr4	0.690736	0.594605	21.292	63.571	110.936	40.24	0.18543	0.55362	0.9661	0.35044
Zfp750	chr11	0.690583	0.623132	26.403	22.112	20.17	68.185	0.25567	0.21412	0.19532	0.66027
Tmem130	chr5	0.690111	0.619648	28.958	12.899	29.135	46.947	0.33261	0.14816	0.33465	0.53925
Tnfsf4	chr1	0.689967	NA	4.258	0.921	15.688	1.118	0.08311	0.01798	0.30619	0.02182
Mir7650	chr9	0.689064	0.561677	26.403	22.112	41.461	43.594	14.053	11.7692	22.0679	23.2033
Mir370	chr12	0.689041	NA	2.555	4.607	5.603	12.296	1.01567	1.83118	2.22718	4.88767
Mttp	chr3	0.68885	0.69406	908.758	145.569	1207.97	930	6.47122	1.03659	8.60186	6.62248
Slain1os	chr14	0.68876	0.524627	42.585	28.561	45.943	77.127	0.43264	0.29017	0.46676	0.78359
Phf11d	chr14	0.688512	0.64241	17.034	11.977	31.376	22.356	0.19915	0.14003	0.36683	0.26137
Slc13a4	chr6	0.688443	0.720199	1812.41	144.648	2466.36	2074.62	16.6129	1.32587	22.6071	19.0163
Pcmtd1	chr1	0.688434	0.000208415	839.771	832.876	1224.78	1482.19	5.04045	4.99906	7.35131	8.89635
Prg4	chr1	0.687963	0.603294	17.034	21.19	33.617	34.651	0.12504	0.15555	0.24677	0.25436
Cgref1	chr5	0.687504	0.571697	89.428	19.348	100.851	90.541	2.10995	0.45649	2.37945	2.13621
Ppap2c	chr10	0.687322	0.23954	290.428	155.704	275.658	461.647	5.52418	2.96161	5.24325	8.7809
Ggact	chr14	0.686915	0.320765	74.097	84.762	160.24	103.954	2.15654	2.46692	4.66366	3.0255
Ppp1r16b	chr2	0.686913	2.19201e-07	1505.8	1479.64	2275.86	2541.85	7.29176	7.16512	11.0208	12.3088
AI197445	chr13	0.686079	0.647876	28.958	10.135	22.411	50.301	0.1621	0.05673	0.12545	0.28157
Rapgef5	chr12	0.685967	0.059657	252.953	193.478	376.509	350.986	1.99237	1.52392	2.96555	2.76452
Slfn9	chr11	0.685794	0.00279936	545.936	449.605	802.323	809.279	4.44612	3.6616	6.53414	6.59079
Chst7	chrX	0.685689	0.373707	51.102	90.29	114.297	121.839	0.7311	1.29175	1.63523	1.74312
Grhl2	chr15	0.685549	0.00633241	350.046	409.067	619.671	609.195	2.22253	2.59727	3.93444	3.86793
Rab17	chr1	0.685413	0.7058	39.178	0.921	50.425	33.534	0.63093	0.01484	0.81206	0.54004
Scarna6	chr1	0.685206	NA	1.703	0.921	2.241	7.825	0.21569	0.11666	0.28379	0.99079
Naaladl1	chr19	0.684455	0.439229	107.314	45.145	146.794	110.661	1.50581	0.63347	2.05979	1.55278
Slc22a1	chr17	0.684014	0.705609	9.369	4.607	14.567	14.531	0.14762	0.07259	0.22953	0.22897
Gm5615	chr9	0.683988	0.669535	8.517	13.82	20.17	22.356	0.1142	0.18531	0.27046	0.29976
Acsl6	chr11	0.683963	0.303143	126.051	165.838	155.758	327.512	1.28771	1.69417	1.59119	3.3458
Ganc	chr2	0.683878	0.18852	142.233	103.188	214.027	188.906	0.92977	0.67453	1.39908	1.23487
Gm20199	chr9	0.68247	0.0477667	313.424	252.442	402.282	516.419	2.46249	1.98337	3.16062	4.05736
Cutc	chr19	0.682458	0.263978	178.004	167.681	387.715	182.2	4.27365	4.0258	9.30852	4.37437
Gm14827	chrX	0.682378	0.369671	56.212	55.279	97.489	88.305	0.57146	0.56198	0.99109	0.89773
Nlrp10	chr7	0.68134	NA	5.962	1.843	3.362	16.767	0.04176	0.01291	0.02355	0.11745
3100003L05Rik	chr7	0.681262	NA	0.852	0	6.723	1.118	0.04028	0	0.31798	0.05286
Fam134b	chr15	0.681256	0.25351	150.75	88.447	203.942	190.024	1.22676	0.71975	1.65962	1.54636
Rasal1	chr5	0.681125	0.668619	22.144	7.371	35.858	20.12	0.20678	0.06883	0.33484	0.18788
Gimap3	chr6	0.680905	NA	1.703	1.843	5.603	5.589	0.02494	0.02698	0.08203	0.08182
Gimap9	chr6	0.680397	0.402685	67.284	45.145	90.766	97.248	1.52779	1.02509	2.06099	2.20817
Adam1b	chr5	0.679925	NA	0	0.921	11.206	0	0	0.01003	0.12202	0
Olfr701	chr7	0.679925	NA	0	0.921	11.206	0	0	0.00945	0.11489	0
Ndfip2	chr14	0.679741	0.00407786	606.406	537.131	1026.43	817.104	7.83027	6.93574	13.2539	10.5509
Vwa8	chr14	0.679473	0.0281967	310.017	292.981	545.714	429.231	1.3531	1.27875	2.38183	1.87343
Hist1h2aa	chr13	0.678755	NA	0	0.921	0	11.178	0	0.06401	0	0.7766
2610528J11Rik	chr4	0.678733	0.700265	446.288	70.942	572.607	465	15.3169	2.43477	19.6522	15.9591
A630012P03Rik	chrX	0.678528	0.564458	22.144	34.089	40.34	57.007	0.35264	0.54285	0.6424	0.90782
Myh14	chr7	0.67836	0.505562	40.881	29.482	58.269	61.478	0.19502	0.14064	0.27797	0.29327
Pde6a	chr18	0.677473	NA	1.703	1.843	4.482	6.707	0.01274	0.01378	0.03353	0.05017
Ssh3	chr19	0.676939	0.613688	17.886	19.348	32.496	33.534	0.20597	0.2228	0.37422	0.38616
Lrrc74b	chr16	0.676935	0.637875	20.441	12.899	24.652	35.769	0.28772	0.18156	0.347	0.50349
Nfxl1	chr5	0.676916	6.20445e-07	1118.28	1150.73	1798.5	1837.64	9.56883	9.84656	15.3894	15.7243
Patl2	chr2	0.676479	0.730197	7.665	2.764	23.532	2.236	0.0989	0.03566	0.30361	0.02884
Btg3	chr16	0.676093	NA	3.407	2.764	8.964	6.707	0.04065	0.03298	0.10696	0.08002
Pnpla1	chr17	0.675672	0.390567	57.064	53.437	101.971	81.599	0.39973	0.37432	0.71431	0.5716
Cr2	chr1	0.675563	0.563972	24.699	30.404	38.099	57.007	0.12496	0.15382	0.19276	0.28842
Neurl3	chr1	0.675224	0.548099	36.623	23.954	47.064	57.007	0.44525	0.29123	0.57219	0.69308
Nmur2	chr11	0.674966	0.695866	5.962	12.899	15.688	21.238	0.05715	0.12364	0.15038	0.20359
Ly6g5b	chr17	0.674778	0.630281	19.589	14.741	34.737	26.827	0.58364	0.43921	1.03498	0.79929
1700047E10Rik	chr14	0.67449	0.305803	72.394	80.155	110.936	139.724	4.00249	4.43158	6.13337	7.72499
Gm19522	chr16	0.673977	0.631412	12.775	32.246	29.135	51.418	0.15857	0.40025	0.36163	0.63822
Slc8b1	chr5	0.673495	0.390585	78.356	52.515	124.382	92.776	0.85409	0.57243	1.35579	1.01128
Amph	chr13	0.67275	0.00125395	551.046	579.512	969.287	841.695	5.35584	5.63251	9.42088	8.18077
Gm13497	chr2	0.672418	0.72616	2.555	9.213	10.085	15.649	0.03937	0.14197	0.1554	0.24113
Ooep	chr9	0.67232	0.464236	39.178	57.122	67.234	93.894	1.01932	1.48618	1.74927	2.44291
Cacnb4	chr2	0.672253	0.390124	52.805	60.807	104.212	83.834	0.191	0.21994	0.37694	0.30323
Cyp2d22	chr15	0.672229	0.645473	16.182	14.741	33.617	22.356	0.18332	0.167	0.38084	0.25326
Gm12253	chr11	0.672164	0.643302	15.331	15.662	23.532	32.416	0.35504	0.36272	0.54497	0.75071
Pp2d1	chr17	0.671945	0.5978	31.513	18.426	34.737	52.536	0.39968	0.2337	0.44058	0.66632
Nkapl	chr13	0.671657	0.435296	46.843	47.909	70.595	87.188	1.01102	1.03402	1.52367	1.88178
Cubn	chr2	0.671331	0.730797	7787.04	173.209	12568.2	10757.6	21.5929	0.48029	34.8507	29.83
Frs3	chr17	0.670931	0.517197	28.958	40.538	61.631	55.889	0.42593	0.59627	0.90652	0.82207
Sec24d	chr3	0.670563	0.126375	391.779	218.353	488.565	498.534	3.18984	1.77782	3.97786	4.05902
Ak5	chr3	0.670073	0.647012	19.589	13.82	21.291	39.123	0.19825	0.13986	0.21547	0.39593
Slc16a9	chr10	0.6698	0.706119	219.737	35.932	299.19	209.027	1.93671	0.31669	2.63699	1.84231
Glo1	chr17	0.669552	0.123255	6096.43	4005.91	8393.01	7924.01	98.7357	64.8783	135.93	128.334
Acvr1c	chr2	0.669238	NA	2.555	0	11.206	1.118	0.00887	0	0.03889	0.00388
Dydc2	chr14	0.668613	0.726264	10.22	2.764	10.085	17.885	0.54215	0.14662	0.53497	0.94871
Maats1	chr16	0.668151	0.590628	19.589	27.64	40.34	41.358	0.22248	0.31392	0.45816	0.46972
Ccdc84	chr9	0.668022	0.0648392	185.669	221.117	330.566	323.041	5.0351	5.9964	8.9645	8.76043
Map1a	chr2	0.667894	0.0354371	496.538	375.9	600.621	799.219	1.30901	0.99098	1.58341	2.10697
Mtmr7	chr8	0.667729	0.0164302	323.644	289.295	500.891	480.649	2.94936	2.63635	4.56462	4.38015
BC033916	chr17	0.667693	0.185774	175.449	174.13	212.907	353.221	6.82738	6.77605	8.285	13.7452
Exoc6b	chr6	0.667595	1.28557e-05	982.855	1048.46	1685.33	1550.37	5.67371	6.05245	9.72885	8.94981
4931429L15Rik	chr9	0.667284	0.700265	6.814	11.056	17.929	16.767	0.10504	0.17044	0.2764	0.25849
Mir6399	chr4	0.667278	NA	0	0.921	1.121	6.707	0	0.34444	0.41892	2.50731
Prph	chr15	0.665686	0.630257	27.254	13.82	42.581	30.18	0.45891	0.2327	0.717	0.50818
Cd22	chr7	0.665474	0.518961	35.771	31.325	58.269	54.772	0.25409	0.22251	0.4139	0.38906
Cyp7b1	chr3	0.665457	0.594605	32.364	19.348	36.979	52.536	0.46923	0.28051	0.53613	0.76169
G630093K05Rik	chr13	0.665188	NA	0	0	3.362	2.236	0	0	0.03015	0.02005
Smcp	chr3	0.665188	NA	0	0	3.362	2.236	0	0	0.11875	0.07897
Oog4	chr4	0.665188	NA	0	0	3.362	2.236	0	0	0.05389	0.03584
Mug2	chr6	0.665188	NA	0	0	3.362	2.236	0	0	0.02323	0.01545
Mir7679	chr11	0.664957	NA	0	0	2.241	3.353	0	0	1.11713	1.67154
Mir543	chr12	0.664957	NA	0	0	2.241	3.353	0	0	0.92604	1.38562
Vmn1r45	chr6	0.664957	NA	0	0	2.241	3.353	0	0	0.02166	0.03241
Olfr893	chr9	0.664957	NA	0	0	2.241	3.353	0	0	0.07471	0.11179
Mageb4	chrX	0.664957	NA	0	0	2.241	3.353	0	0	0.02931	0.04386
6030443J06Rik	chr5	0.66421	0.339231	79.208	96.739	109.815	177.728	0.57525	0.70257	0.79754	1.29077
D930032P07Rik	chr19	0.663896	0.648532	20.441	11.977	30.255	27.945	0.48851	0.28624	0.72307	0.66785
Zfp459	chr13	0.663815	0.110747	148.195	169.523	265.573	244.796	1.39754	1.59868	2.50447	2.30853
Slc38a4	chr15	0.66363	0.137494	3901.61	4879.32	5784.34	8345.41	31.1607	38.9693	46.1973	66.6516
Magi2	chr5	0.663276	0.444626	56.212	58.043	69.475	119.603	0.24405	0.25201	0.30164	0.51928
AF366264	chr8	0.663256	0.728707	5.11	6.449	7.844	16.767	0.05613	0.07084	0.08616	0.18417
Oas1a	chr5	0.663211	NA	2.555	3.685	10.085	5.589	0.0425	0.0613	0.16775	0.09296
BC027072	chr17	0.662677	NA	0	0	8.964	0	0	0	0.05624	0
1700049E15Rik	chr6	0.662677	NA	0	0	8.964	0	0	0	0.30566	0
Tas2r138	chr6	0.662677	NA	0	0	8.964	0	0	0	0.28265	0
Gm2027	chr12	0.661629	0.582594	22.996	26.718	42.581	42.476	0.23873	0.27737	0.44205	0.44096
Ppp1r27	chr11	0.661618	NA	0.852	0.921	3.362	4.471	0.03451	0.03733	0.13622	0.18117
Gm11564	chr11	0.661554	NA	0	0	0	8.942	0	0	0	0.40639
Hsd17b3	chr13	0.661554	NA	0	0	0	8.942	0	0	0	0.21837
Serpinb9c	chr13	0.661554	NA	0	0	0	8.942	0	0	0	0.14364
Lcn4	chr2	0.661554	NA	0	0	0	8.942	0	0	0	0.36281
Cypt12	chr3	0.661554	NA	0	0	0	8.942	0	0	0	0.55171
Olfr46	chr7	0.661554	NA	0	0	0	8.942	0	0	0	0.23598
Fbxw21	chr9	0.661554	NA	0	0	0	8.942	0	0	0	0.18898
LOC100503280	chrX	0.661554	NA	0	0	0	8.942	0	0	0	0.16636
B130006D01Rik	chr11	0.66127	0.326487	74.949	86.604	153.517	109.543	0.73829	0.8531	1.51222	1.07906
Cntnap1	chr11	0.660745	0.715671	11.924	5.528	11.206	23.474	0.06986	0.03239	0.06565	0.13753
Slc43a2	chr11	0.660333	0.199153	515.275	229.409	598.38	602.488	2.23747	0.99616	2.59834	2.61617
Mir3473f	chr3	0.659933	0.266455	97.093	106.873	136.709	193.378	14.4505	15.9061	20.3465	28.7806
9930111H07Rik	chr1	0.659014	0.646776	19.589	15.662	22.411	40.24	0.74928	0.59909	0.85723	1.5392
Map3k8	chr18	0.658868	0.652942	18.737	13.82	35.858	22.356	0.23471	0.17311	0.44917	0.28003
Gm20337	chr12	0.658784	0.503109	40.881	42.381	53.787	84.952	1.12418	1.16541	1.47907	2.33606
Slc6a18	chr13	0.658042	0.244698	97.945	103.188	143.432	181.082	0.69825	0.73563	1.02253	1.29094
Gm5415	chr1	0.658003	0.734944	4.258	5.528	10.085	11.178	0.03568	0.04632	0.0845	0.09366
Col9a3	chr2	0.657472	0.235232	91.983	103.188	159.12	155.373	1.01496	1.1386	1.75576	1.71442
Fam227a	chr15	0.657355	0.341435	78.356	81.998	104.212	156.49	0.47439	0.49643	0.63093	0.94743
Mnd1	chr3	0.657314	0.00180112	581.707	510.413	847.145	884.171	20.9011	18.3394	30.4385	31.7688
Hnf1b	chr11	0.657158	0.143202	715.423	345.496	917.741	782.452	7.4939	3.61899	9.61313	8.19601
Fmo5	chr3	0.657095	0.677099	17.034	9.213	22.411	25.709	0.10057	0.05439	0.13232	0.15179
Slc17a7	chr7	0.657087	NA	1.703	1.843	0	14.531	0.01819	0.01968	0	0.15521
Clrn1	chr3	0.655751	0.701579	16.182	7.371	13.447	31.298	0.16483	0.07508	0.13697	0.3188
Trpm3	chr19	0.655475	0.612152	28.106	21.19	30.255	54.772	0.08234	0.06208	0.08864	0.16046
Tmem37	chr1	0.655334	0.472316	280.207	70.021	317.119	261.563	8.65237	2.16212	9.79215	8.07665
Gpr111	chr17	0.655292	NA	3.407	0	2.241	11.178	0.03259	0	0.02144	0.10692
Fam159b	chr13	0.654509	NA	4.258	0	5.603	8.942	0.10208	0	0.13431	0.21437
Tagap	chr17	0.653035	NA	2.555	1.843	5.603	6.707	0.02609	0.01881	0.0572	0.06847
Ltbr	chr6	0.652953	0.0656891	249.546	219.275	410.126	335.337	3.74599	3.29157	6.15647	5.0338
Ccdc38	chr10	0.6529	0.445446	63.877	64.493	136.709	73.774	0.54883	0.55411	1.17459	0.63386
[truncated: 22,037 more rows]
