# Supplementary material for: EHMT2 directs DNA methylation for efficient gene silencing in mouse embryos
Source: HighWire-hosted journal article supplement (doi:10.1101/gr.198291.115), 2015-11-17
Supplement: SuppTable_S3.xlsx [file SuppTable_S3.xlsx]

## Sheet: Primer sequences
Methylation sensitive PCR (McrBC digestion )
IAP	TATGCCGAGGGTGGTTCTCTA
	TGCGGCAAAACTTTATTGCTT
Kcnq1ot1	CGGATCACTTGAGCACTAC
	GCCAAGTGGATCGCGCCAAG
H19	GATCAGGCATTTGTGCACTTAC
	TAGGTTACCTGGGACATTGC
Snrpn	AGGTTGTGACTGGGATCCTG
	TGCAGCGGCAACAGAACTTCT
Sodium Bisulfite PCR (followed by COBRA or Sequencing)
Dazl	GATTTTTGTTATTTTTTAGTTTTTTTAGGAT
	AAAATTCTCTCAACTAACCTAACTTATTTCT
Dpep3	GAGTAGTTAGGGTGTAGGTTATTTATAGAGA
	TCAAACACTAACACACATAAATCTAACC
Tex12	TAAGTTAGTTTGGAATTTTTTGGGTAGT
	AACTTACTCCAACTTCTCCACAATATAAA
Rho	GTATAGAGGGTTTTAATTTTTATGTGTTTTT
	ATCTCTCTACTCATACCTCCAAATATAACA
Crygd	GGGGTTGGGAGTAGGGTTTATATAGTA
	AATCTCCCATAAACTTAAAATTTTCACC
Cplx4	GGTTTTGGAGAATTGAAATTTTGTTAA
	AACCTAACATACACAAAACCCTTCTCT
Mfrp	AAGGAAAGGAAGTTGATAATTTTGTTAT
	ACTAAAATCCTAACCCTAACACTAAACAAC
Asz1	TAAGTTAAAGTTTTGGGAAAAAGTTAGG
	TTATTTCTAATAAAAATCCATCTCACCC
Naa11	GGTAGGTAGAGTAGGTTGTAGTGTTGTATG
	AAAAAACTCATCAAATTAAATTCAATCC
Cyct	TGGAATAAGAATTTAGTTTTTTAAATGTTT
	CAACAATTACACCTTACATCTTAACCTC
Trim13	TGGTTTTTATGGAAGGAGTTTTAGTTAAG
	CCAAAAACCTTATCCTCTAAATAAACAAAT
Aplnr	TGTTGTATTGGTTTTGTGATTTTGATATT
	AAACTATTTACAAAACTCCATCCCTTTC
Tff3	TTTAGTGGTAGTATAAGGTGGTGTGTAGG
	AAACATACTAAATTCCAACCCCAAAC
Tenm2	AGGAATTTTTTAATTATAAGAATTAGATAGGG
	ATAACAAATACCACAACTCCAACCTC
Enpp1	TTTTTTGAATTATTAGAGATTGAATGGG
	AACTCTTACACCAAAAATCAAACCTAAC
Sh3tc2	AGAAGGTTGTATTTTTTGGTTGTTTTTT
	AACATCTTCTTAAAACAATTTTCCATAAC
Pou5f1	AGAATTGAGGAGTGGTTTTAGAAATAAT
	CCACCTAAAAACCCTTAAAAACTTAAC
Dppa3	TAGATTGATTGTTAATTGGGTTTTG
	AAAACTCCCTAATCCTCCACTAAATC
Peg3	TTGATAATAGTAGTTTGATTGGT
	ATCTACAACCTTATCAATTACCCTTAAAAA
Kcnq1ot1	GGTGAGGTTATATTAGTTAGTTA
	ACCATACCTAAAAAAACCATA
H19	GTTGTGTAGATTTGGTTATAGT
	TTCTCCTAATCTCTAATCTCAA
Snrpn	ATTGGTGAGTAATTTTTTGGA
	ACAAAACTCCTACATCCTAAAAC
IAP (5' LTR)	GATAGTTGTGTTTTAAGTGGTAAATAAATA
	ATTCTAATTCTAAAATAAAAAATCTTCCTTA
RLTR4 (5' LTR)	TAAATTTGTGTGTTTGTTAATGTTTTGATT
	AAATCRATAATCCCTAAACAAAAATCTCCA
ETnERV (5' LTR)	AAATTTGAGTTTTGATTAGTATGAAATTGT
	AACTTTAAACCCTTTCTTCTTCCACCTAAA
ChIP-qPCR
Actb	CGCTGTGGCGTCCTATAAAA
	AAGGAGCTGCAAAGAAGCTG
Ube2f	CAGCTGCAAACCGGTCGGATTC
	GGTCACCGAAGCGCAAGCATC
Rhox11	GCTCACTGGTCTCGGCCACC
	CCGAAAGAGGGCCACCAGAGC
Asz1	CCAGCCGTCATCCTCACTAT
	ATCAGGTTCCGGTGTGAAAG
Naa11	TCTTTGCTTGTGGGGTTCTT
	CAGTGAGGTGGAACCCAAGT
Cyct	ACCAGCAAAGCGCTTACATT
	TCCTCTCAGTCGCGTTACCT
Trim13	TTTGAGGAAACCCTCCACAG
	AGTCATGGAAAAGCCCCTCT
Aplnr	TGTACGCCAGTGTCTTTTGC
	CCATGACAGGCACAGCTAGA
Tenm2	CTTCAAGGTCTCGCTGGAAC
	GTCGCGGAGTTCTGTTTCAT
Tff3	GCGAGCGAGGTGTCTATTTC
	ATCACGCTGCTTCCACTTCT
Slc38a4	TCACTTTGCTCCAGGCTCTT
	GCATGCTCCCGTTGTTAAAT
Tex101	CCCTTCTCCTCCTTCCATTC
	GACACACTGTGGCCTGAAAA
Sycp1	TCAATTTAACGGTTGGTCCAG
	ATTTTGAGCGCAGACTTGGT
RT-qPCR
Actb	GCGGACTGTTACTGAGCTGCG
	TGTTTGCTCCAACCAACTGCTGTC
Rpl13a	GGTCCTCAAGACCAACGGACTC
	GTGCGCTGTCAGCTCTCTAATG
Dnmt1	CAAAAGAGGAGGCTGCTACCA
	AAAAACATCAGTGCACGTGGG
Dnmt3a	TCCCAAGCTGGTGCTAATTC
	GGTCCAGGAGGCTCTTTAGG
Dnmt3b	CACCTCACCTGTCCCCTTTTT
	CACTGAGCAGGAGAAAGCTGA
Uhrf1	CTTCTTCACTCCCCTCACCA
	TCCATGACACCCAGTCAGTG
Tet1	GCCTCCTCTTACGTTGGTGA
	TCAGCCGTTTTATCACAGCA
Tet2	GGAGAGTTGGCATTCAGCAG
	CAGTCCAAAGCTGTCCTCGT
Tet3	CTTCCTTGGCCTTGACACAT
	ACGCTCCTTCCCTTAAGCAC
Asz1	CCCGAATCCACACACTGTAAC
	CGGGAAAATGACCCAACTC
Naa11	ATCTGCTGGGCTGTTACCAC
	TGTCTCCAGGGCAGCATAAT
Cyct	CATGAGGATGTGGCCTGTTT
	GGAATATTTGGAGAACCCGAAG
Trim13	CACTCTAATTTGCCCACAAGC
	GCGGCAAAGACAGTTTATCC
Tenm2	CTGAGCCACCCAGAGAAGAG
	GGCAGACAGTAGCAGCAACA
Sh3tc2	GAGGAGCTGCAGAACACCAT
	TCTCTGAAGAGCACCCGAAG
